# Supplementary material for: Inheritance of heat tolerance in perennial ryegrass (Lolium perenne, Poaceae): evidence from progeny array analysis
Source: PeerJ. 2021 Jul 20;9:e11782. doi: 10.7717/peerj.11782 (PMC8300491; doi:10.7717/peerj.11782)
Supplement: Supplemental Information 1 — Data were collected at 40 days of exposure to heat stress for chlorophyll florescence (Fv/Fm) and Hydrogen peroxide (H2O2) content, while data of leaf properties; specific leaf area, leaf water content, leaf thickness and leaf density were collected before stress. [file peerj-09-11782-s001.xls]

## Sheet: data
; simulated data, described in K7N4.loc
nind = 86
ntrt = 16
miss = *
ind	genotype	Fv/Fm-0	Fv/Fm-10	Fv/Fm-20	Fv/Fm-30	Fv/Fm-40	H2O2-con	H2O2-40	MDA-con	MDA-40	LWC	LA	SLA	LT	LD
1	*	*	*	*	*	*	*	*	*	*	*	*	*	*	*
2	*	*	*	*	*	*	*	*	*	*	*	*	*	*	*
3	*	*	*	*	*	*	*	*	*	*	*	*	*	*	*
4	*	*	*	*	*	*	*	*	*	*	*	*	*	*	*
5	*	*	*	*	*	*	*	*	*	*	*	*	*	*	*
6	*	*	*	*	*	*	*	*	*	*	*	*	*	*	*
8	*	*	*	*	*	*	*	*	*	*	*	*	*	*	*
9	9	0.778	0.758	0.753	0.721	0.761	0.2	0.51	16.2	*	79.3	1.95	27.6	156	232
10	*	*	*	*	*	*	*	*	*	*	*	*	*	*	*
11	*	*	*	*	*	*	*	*	*	*	*	*	*	*	*
12	*	*	*	*	*	*	*	*	*	*	*	*	*	*	*
13	13	0.802	0.768	0.759	0.762	0.718	0.16	0.79	13.45	51.08	79.7	3.36	23.6	191	223
14	*	*	*	*	*	*	*	*	*	*	*	*	*	*	*
15	*	*	*	*	*	*	*	*	*	*	*	*	*	*	*
16	16	0.791	0.773	0.766	0.752	0.743	0.16	0.62	15.83	*	79.6	2.31	27.6	167	217
17	*	*	*	*	*	*	*	*	*	*	*	*	*	*	*
18	18	0.786	0.762	0.761	0.725	0.705	0.24	0.45	18.7	*	79.1	2.47	27.5	155	235
20	*	*	*	*	*	*	*	*	*	*	*	*	*	*	*
21	*	*	*	*	*	*	*	*	*	*	*	*	*	*	*
22	*	*	*	*	*	*	*	*	*	*	*	*	*	*	*
23	23	0.799	0.765	0.758	0.739	0.657	0.18	0.88	17.09	45.66	76.6	3.73	24	204	205
24	*	*	*	*	*	*	*	*	*	*	*	*	*	*	*
26	26	0.794	0.773	0.743	0.739	0.724	0.17	0.71	15.89	*	77.7	2.51	25.9	165	235
30	*	*	*	*	*	*	*	*	*	*	*	*	*	*	*
31	*	*	*	*	*	*	*	*	*	*	*	*	*	*	*
32	32	0.791	0.754	0.724	0.658	0.722	0.19	0.65	17.65	*	79.5	2.69	28.1	178	200
33	*	*	*	*	*	*	*	*	*	*	*	*	*	*	*
34	*	*	*	*	*	*	*	*	*	*	*	*	*	*	*
35	35	0.786	0.748	0.709	0.693	0.759	0.22	0.87	18.43	*	79.1	2.82	28.1	173	206
36	36	0.782	0.773	0.765	0.744	0.742	0.19	0.32	19.18	*	78.9	2.92	27.8	165	218
37	37	0.79	0.74	0.603	0.742	0.711	0.24	0.78	18.36	*	78.6	2.97	27.3	186	197
38	*	*	*	*	*	*	*	*	*	*	*	*	*	*	*
39	*	*	*	*	*	*	*	*	*	*	*	*	*	*	*
40	40	0.787	0.754	0.714	0.746	0.736	0.17	0.86	16.9	*	77.4	3.6	23.8	159	267
41	*	*	*	*	*	*	*	*	*	*	*	*	*	*	*
42	42	0.778	0.756	0.761	0.764	0.735	0.16	0.89	18.05	41.46	82.7	1.85	33.4	179	168
44	*	*	*	*	*	*	*	*	*	*	*	*	*	*	*
45	45	0.796	0.761	0.73	0.532	0.734	0.18	0.39	21.12	*	77.9	3.04	26.2	141	270
46	*	*	*	*	*	*	*	*	*	*	*	*	*	*	*
47	*	*	*	*	*	*	*	*	*	*	*	*	*	*	*
48	48	0.798	0.759	0.73	0.747	0.694	0.24	0.76	15.69	*	78	3.18	26.4	213	178
49	*	*	*	*	*	*	*	*	*	*	*	*	*	*	*
50	50	0.797	0.757	0.747	0.718	0.725	0.2	0.46	18.37	*	78.5	3.28	26.8	170	220
51	*	*	*	*	*	*	*	*	*	*	*	*	*	*	*
52	*	*	*	*	*	*	*	*	*	*	*	*	*	*	*
53	*	*	*	*	*	*	*	*	*	*	*	*	*	*	*
54	54	0.801	0.764	0.738	0.724	0.703	0.15	0.86	10.8	35.32	80.2	3.01	24	151	276
55	55	0.779	0.757	0.746	0.672	0.564	0.18	1.34	14.97	*	78.2	3.32	26.1	171	224
56	56	0.78	0.761	0.747	0.723	0.666	0.21	0.79	14.97	24.2	76.1	4.84	22.9	*	*
58	*	*	*	*	*	*	*	*	*	*	*	*	*	*	*
59	59	0.802	0.773	0.761	0.74	0.73	0.22	0.77	20.79	33.08	78	3.4	26.1	165	232
60	60	0.787	0.763	0.764	0.752	0.711	0.19	0.97	17.73	*	78.7	3.48	26.4	166	228
61	*	*	*	*	*	*	*	*	*	*	*	*	*	*	*
63	63	0.8	0.765	0.749	0.693	0.628	0.19	0.95	18.25	*	77.8	3.71	26	164	235
64	*	*	*	*	*	*	*	*	*	*	*	*	*	*	*
65	*	*	*	*	*	*	*	*	*	*	*	*	*	*	*
66	*	*	*	*	*	*	*	*	*	*	*	*	*	*	*
67	*	*	*	*	*	*	*	*	*	*	*	*	*	*	*
68	68	0.802	0.768	0.77	0.77	0.749	0.17	0.74	16.17	*	80.1	3.44	23.8	179	234
69	69	0.798	0.767	0.75	0.776	0.767	0.18	0.71	15.55	*	80.4	2.39	30.1	209	170
70	*	*	*	*	*	*	*	*	*	*	*	*	*	*	*
71	*	*	*	*	*	*	*	*	*	*	*	*	*	*	*
72	*	*	*	*	*	*	*	*	*	*	*	*	*	*	*
73	*	*	*	*	*	*	*	*	*	*	*	*	*	*	*
74	*	*	*	*	*	*	*	*	*	*	*	*	*	*	*
75	*	*	*	*	*	*	*	*	*	*	*	*	*	*	*
76	*	*	*	*	*	*	*	*	*	*	*	*	*	*	*
77	*	*	*	*	*	*	*	*	*	*	*	*	*	*	*
88	*	*	*	*	*	*	*	*	*	*	*	*	*	*	*
89	*	*	*	*	*	*	*	*	*	*	*	*	*	*	*
90	90	0.794	0.759	0.768	0.756	0.751	0.16	0.75	12.27	26.28	81.3	2.91	29	162	214
92	92	0.807	0.76	0.762	0.624	0.701	0.2	0.94	20.79	67.64	81.4	4.48	28.4	159	222
95	95	0.794	0.782	0.761	0.726	0.685	0.22	1.03	13.63	38.51	78.1	3.01	24.9	170	238
97	97	0.788	0.749	0.771	0.745	0.718	0.2	0.65	14.93	23.16	80.7	2.63	35.4	166	173
98	98	0.779	0.762	0.76	0.698	0.681	0.2	1.09	16.01	*	77.8	3.98	26.4	152	249
100	*	*	*	*	*	*	*	*	*	*	*	*	*	*	*
101	101	0.791	0.73	0.74	0.658	0.483	0.2	1.57	22.51	*	78.7	4.45	25.5	184	214
102	102	0.797	0.761	0.716	0.683	0.712	0.24	0.84	18.46	*	77.8	4.54	26.3	163	235
103	103	0.79	0.773	0.756	0.735	0.742	0.18	0.74	19.64	48.38	77.9	4.09	26.6	187	201
104	104	0.802	0.783	0.77	0.747	0.748	0.25	0.89	16.19	50.41	76.7	5.8	23.7	206	206
105	*	*	*	*	*	*	*	*	*	*	*	*	*	*	*
106	*	*	*	*	*	*	*	*	*	*	*	*	*	*	*
107	*	*	*	*	*	*	*	*	*	*	*	*	*	*	*
108	*	*	*	*	*	*	*	*	*	*	*	*	*	*	*
109	109	0.788	0.764	0.756	0.761	0.731	0.31	1.15	18.54	52.21	80.2	4.5	29.2	162	213
110	*	*	*	*	*	*	*	*	*	*	*	*	*	*	*

## Sheet: FVFM0
Nr	Group	Position	Locus	LOD	# Iter.	mu_ac{00}	mu_ad{00}	mu_bc{00}	mu_bd{00}	Variance	% Expl.	GIC_1	GIC_2	GIC_m
1	LG1(K7)	0	TAT-ccaa-150	0	3	0.792	0.792	0.7919	0.7919	6.38727e-05	0	1	0	0.5
2	LG1(K7)	1		0	3	0.791891	0.791891	0.791971	0.791971	6.38736e-05	0	0.963	0	0.482
3	LG1(K7)	2		0	4	0.791777	0.791777	0.792048	0.792048	6.38574e-05	0	0.934	0	0.467
4	LG1(K7)	3		0.01	4	0.791659	0.791659	0.792129	0.792129	6.38219e-05	0.1	0.914	0	0.457
5	LG1(K7)	4		0.01	5	0.791542	0.791542	0.792213	0.792213	6.37666e-05	0.2	0.902	0	0.451
6	LG1(K7)	5		0.02	5	0.791429	0.791429	0.792295	0.792295	6.36936e-05	0.3	0.898	0	0.449
7	LG1(K7)	6		0.03	5	0.791324	0.791324	0.792375	0.792375	6.3607e-05	0.4	0.902	0	0.451
8	LG1(K7)	7		0.04	5	0.791227	0.791227	0.79245	0.79245	6.35116e-05	0.6	0.915	0	0.458
9	LG1(K7)	8		0.05	5	0.79114	0.79114	0.792518	0.792518	6.34125e-05	0.7	0.936	0	0.468
10	LG1(K7)	9		0.06	4	0.791063	0.791063	0.79258	0.79258	6.33137e-05	0.9	0.965	0	0.483
11	LG1(K7)	9.931	LmSSR16-6G-230	0.07	4	0.791	0.791	0.792632	0.792632	6.32249e-05	1	1	0	0.5
12	LG1(K7)	10.931		0.06	5	0.79104	0.79104	0.79259	0.79259	6.32899e-05	0.9	0.96	0	0.48
13	LG1(K7)	11.931		0.05	5	0.791108	0.791108	0.79253	0.79253	6.33842e-05	0.8	0.93	0	0.465
14	LG1(K7)	12.931		0.03	6	0.791208	0.791208	0.792452	0.792452	6.35008e-05	0.6	0.911	0	0.455
15	LG1(K7)	13.931		0.02	6	0.791338	0.791338	0.792355	0.792355	6.36252e-05	0.4	0.901	0	0.45
16	LG1(K7)	14.931		0.01	6	0.791491	0.791491	0.792246	0.792246	6.37375e-05	0.2	0.901	0	0.451
17	LG1(K7)	15.931		0.01	5	0.791654	0.791654	0.792132	0.792132	6.382e-05	0.1	0.912	0	0.456
18	LG1(K7)	16.931		0	4	0.791814	0.791814	0.792023	0.792023	6.38646e-05	0	0.932	0	0.466
19	LG1(K7)	17.931		0	3	0.79196	0.79196	0.791926	0.791926	6.38748e-05	0	0.963	0	0.481
20	LG1(K7)	18.855	GTC-cttg-170	0	3	0.792077	0.792077	0.79185	0.79185	6.38628e-05	0	1	0	0.5
21	LG1(K7)	19.855		0	3	0.792017	0.792017	0.79189	0.79189	6.38713e-05	0	0.955	0	0.477
22	LG1(K7)	20.855		0	3	0.791954	0.791954	0.79193	0.79193	6.3875e-05	0	0.926	0	0.463
23	LG1(K7)	21.855		0	3	0.791889	0.791889	0.79197	0.79197	6.38736e-05	0	0.915	0	0.458
24	LG1(K7)	22.855		0	3	0.791823	0.791823	0.792009	0.792009	6.38669e-05	0	0.921	0	0.461
25	LG1(K7)	23.855		0	4	0.791755	0.791755	0.792048	0.792048	6.38552e-05	0	0.944	0	0.472
26	LG1(K7)	24.855		0	4	0.791687	0.791687	0.792084	0.792084	6.38386e-05	0.1	0.984	0	0.492
27	LG1(K7)	25.16	CaiSSRB01A19-150	0	4	0.791667	0.791667	0.792095	0.792095	6.38326e-05	0.1	1	0	0.5
28	LG1(K7)	26.16		0	4	0.791667	0.791667	0.792095	0.792095	6.38326e-05	0.1	0.982	0	0.491
29	LG1(K7)	26.505	ATC-caac-280	0	4	0.791667	0.791667	0.792095	0.792095	6.38326e-05	0.1	1	0	0.5
30	LG1(K7)	27.505		0.01	4	0.791632	0.791632	0.792119	0.792119	6.38199e-05	0.1	0.965	0	0.482
31	LG1(K7)	28.505		0.01	4	0.791597	0.791597	0.792143	0.792143	6.38053e-05	0.1	0.936	0	0.468
32	LG1(K7)	29.505		0.01	5	0.791563	0.791563	0.792168	0.792168	6.3789e-05	0.1	0.914	0	0.457
33	LG1(K7)	30.505		0.01	5	0.79153	0.79153	0.792193	0.792193	6.37713e-05	0.2	0.897	0	0.449
34	LG1(K7)	31.505		0.01	5	0.791499	0.791499	0.792218	0.792218	6.37526e-05	0.2	0.887	0	0.443
35	LG1(K7)	32.505		0.01	5	0.791471	0.791471	0.792241	0.792241	6.37337e-05	0.2	0.883	0	0.441
36	LG1(K7)	33.505		0.02	5	0.791446	0.791446	0.792264	0.792264	6.37151e-05	0.3	0.885	0	0.442
37	LG1(K7)	34.505		0.02	5	0.791424	0.791424	0.792284	0.792284	6.36974e-05	0.3	0.893	0	0.446
38	LG1(K7)	35.505		0.02	5	0.791406	0.791406	0.792303	0.792303	6.36812e-05	0.3	0.907	0	0.453
39	LG1(K7)	36.505		0.02	5	0.791392	0.791392	0.792319	0.792319	6.3667e-05	0.3	0.927	0	0.464
40	LG1(K7)	37.505		0.02	5	0.791382	0.791382	0.792334	0.792334	6.36551e-05	0.3	0.954	0	0.477
41	LG1(K7)	38.505		0.02	4	0.791375	0.791375	0.792346	0.792346	6.36457e-05	0.4	0.986	0	0.493
42	LG1(K7)	38.68	GCT-cgct-120	0.02	4	0.791374	0.791374	0.792347	0.792347	6.36444e-05	0.4	0.993	0	0.496
43	LG1(K7)	39.68		0.01	5	0.79163	0.79163	0.792173	0.792173	6.3803e-05	0.1	0.953	0	0.476
44	LG1(K7)	40.68		0	4	0.7919	0.7919	0.791971	0.791971	6.38739e-05	0	0.955	0	0.477
45	LG1(K7)	41.68		0	4	0.792132	0.792132	0.791779	0.791779	6.38442e-05	0	1	0	0.5
46	LG1(K7)	41.686	GTT-caat-170	0	4	0.792133	0.792133	0.791778	0.791778	6.38438e-05	0	1	0	0.5
47	LG1(K7)	42.686		0.02	5	0.791446	0.791446	0.79235	0.79235	6.36723e-05	0.3	0.938	0	0.469
48	LG1(K7)	43.686		0.12	5	0.790735	0.790735	0.792941	0.792941	6.26679e-05	1.9	0.935	0	0.468
49	LG1(K7)	44.686		0.27	4	0.790236	0.790236	0.793358	0.793358	6.14587e-05	3.8	0.992	0	0.496
50	LG1(K7)	44.782	GTT-cgag-400	0.29	4	0.7902	0.7902	0.793389	0.793389	6.13539e-05	3.9	1	0	0.5
51	LG1(K7)	45.782		0.29	5	0.790229	0.790229	0.793468	0.793468	6.12605e-05	4.1	0.964	0	0.482
52	LG1(K7)	46.782		0.29	5	0.790268	0.790268	0.793541	0.793541	6.1198e-05	4.2	0.937	0	0.469
53	LG1(K7)	47.782		0.28	5	0.790316	0.790316	0.793604	0.793604	6.11729e-05	4.2	0.92	0	0.46
54	LG1(K7)	48.782		0.28	5	0.790376	0.790376	0.793657	0.793657	6.1191e-05	4.2	0.912	0	0.456
55	LG1(K7)	49.782		0.27	5	0.790448	0.790448	0.793695	0.793695	6.12564e-05	4.1	0.914	0	0.457
56	LG1(K7)	50.782		0.26	5	0.790531	0.790531	0.793718	0.793718	6.13704e-05	3.9	0.925	0	0.462
57	LG1(K7)	51.782		0.25	5	0.790625	0.790625	0.793723	0.793723	6.15307e-05	3.7	0.945	0	0.473
58	LG1(K7)	52.782		0.24	5	0.790728	0.790728	0.79371	0.79371	6.17304e-05	3.4	0.975	0	0.488
59	LG1(K7)	53.44	TAG-ctgg-300	0.23	4	0.7908	0.7908	0.793692	0.793692	6.18779e-05	3.1	1	0	0.5
60	LG1(K7)	54.44		0.53	6	0.790017	0.790017	0.79471	0.79471	5.85497e-05	8.3	0.825	0	0.413
61	LG1(K7)	55.44		0.74	4	0.78979	0.78979	0.794857	0.794857	5.7602e-05	9.8	0.998	0	0.499
62	LG1(K7)	55.445	TGG-cggg-310	0.74	4	0.789789	0.789789	0.794857	0.794857	5.76022e-05	9.8	1	0	0.5
63	LG1(K7)	56.445		0.42	7	0.790215	0.790215	0.794505	0.794505	5.94527e-05	6.9	0.872	0	0.436
64	LG1(K7)	57.445		0.12	7	0.790981	0.790981	0.793498	0.793498	6.23806e-05	2.3	0.855	0	0.428
65	LG1(K7)	58.445		0	4	0.791892	0.791892	0.792023	0.792023	6.38712e-05	0	0.951	0	0.475
66	LG1(K7)	58.696	TAG-cgga-140	0	4	0.792063	0.792063	0.791717	0.791717	6.38477e-05	0	0.992	0	0.496
67	LG1(K7)	59.595	CaiSSRB06A04-220	0.02	4	0.791579	0.791579	0.792429	0.792429	6.36988e-05	0.3	1	0	0.5
68	LG1(K7)	60.419	CaiSSRB06A04-210	0.01	4	0.791714	0.791714	0.792333	0.792333	6.37864e-05	0.1	1	0	0.5
69	LG1(K7)	61.419		0.07	5	0.791268	0.791268	0.793027	0.793027	6.31449e-05	1.1	0.953	0	0.477
70	LG1(K7)	62.419		0.17	4	0.790956	0.790956	0.793454	0.793454	6.23857e-05	2.3	0.998	0	0.499
71	LG1(K7)	62.446	GTG-ccag-120	0.17	4	0.79095	0.79095	0.793462	0.793462	6.23691e-05	2.4	1	0	0.5
72	LG1(K7)	63.446		0.07	4	0.791306	0.791306	0.793	0.793	6.32038e-05	1.1	0.972	0	0.486
73	LG1(K7)	63.83	GCG-cgcg-150	0.04	4	0.791476	0.791476	0.79275	0.79275	6.34996e-05	0.6	1	0	0.5
74	LG1(K7)	63.869	LmSSR18-2B-190*	0.04	4	0.791476	0.791476	0.79275	0.79275	6.34996e-05	0.6	1	0	0.5
75	LG1(K7)	64.57	TAC-cctc-310	0.17	4	0.79095	0.79095	0.793462	0.793462	6.23691e-05	2.4	1	0	0.5
76	LG1(K7)	64.694	CaiSSRB02M22-300	0.17	4	0.79095	0.79095	0.793462	0.793462	6.23691e-05	2.4	1	0	0.5
77	LG1(K7)	64.694	TCT-cgtt-150	0.17	4	0.79095	0.79095	0.793462	0.793462	6.23691e-05	2.4	1	0	0.5
78	LG1(K7)	64.694	CaiSSRD03H10-230	0.17	4	0.79095	0.79095	0.793462	0.793462	6.23691e-05	2.4	1	0	0.5
79	LG1(K7)	64.694	ATA-cgaa130	0.17	4	0.79095	0.79095	0.793462	0.793462	6.23691e-05	2.4	1	0	0.5
80	LG1(K7)	64.694	AGC-cgat240	0.17	4	0.79095	0.79095	0.793462	0.793462	6.23691e-05	2.4	1	0	0.5
81	LG1(K7)	65.582	CaiSSRB02M22-320	0.02	4	0.791579	0.791579	0.792429	0.792429	6.36988e-05	0.3	1	0	0.5
82	LG1(K7)	65.582	LmSSR13-2H	0.02	4	0.791579	0.791579	0.792429	0.792429	6.36988e-05	0.3	1	0	0.5
83	LG1(K7)	65.582	TTG-ctcg-170	0.02	4	0.791579	0.791579	0.792429	0.792429	6.36988e-05	0.3	1	0	0.5
84	LG1(K7)	65.582	AGT-cgat300	0.02	4	0.791579	0.791579	0.792429	0.792429	6.36988e-05	0.3	1	0	0.5
85	LG1(K7)	66.523	TCC-catc-360	0.02	4	0.791579	0.791579	0.792429	0.792429	6.36988e-05	0.3	1	0	0.5
86	LG1(K7)	67.523		0.05	5	0.791334	0.791334	0.792797	0.792797	6.3356e-05	0.8	0.936	0	0.468
87	LG1(K7)	68.523		0.09	5	0.791158	0.791158	0.793096	0.793096	6.29709e-05	1.4	0.941	0	0.47
88	LG1(K7)	69.383	TTT-cgtc-400	0.12	4	0.7911	0.7911	0.793231	0.793231	6.27911e-05	1.7	1	0	0.5
89	LG1(K7)	70.383		0.41	7	0.790192	0.790192	0.794441	0.794441	5.95034e-05	6.8	0.895	0	0.448
90	LG1(K7)	71.383		0.66	5	0.789896	0.789896	0.794717	0.794717	5.82016e-05	8.9	0.991	0	0.495
91	LG1(K7)	71.429	LmSSR1-6G	0.67	4	0.789895	0.789895	0.794714	0.794714	5.82014e-05	8.9	1	0	0.5
92	LG1(K7)	72.429		0.42	7	0.789938	0.789938	0.794252	0.794252	5.92479e-05	7.2	0.867	0	0.433
93	LG1(K7)	73.429		0.14	6	0.790685	0.790685	0.79312	0.79312	6.23938e-05	2.3	0.905	0	0.452
94	LG1(K7)	73.986	CaiSSRD09J21-170	0.04	4	0.791267	0.791267	0.7925	0.7925	6.3498e-05	0.6	1	0	0.5
95	LG1(K7)	74.986		0.05	4	0.791218	0.791218	0.792538	0.792538	6.34432e-05	0.7	0.87	0	0.435
96	LG1(K7)	75.986		0.05	5	0.791187	0.791187	0.792561	0.792561	6.34075e-05	0.7	0.824	0	0.412
97	LG1(K7)	76.986		0.05	4	0.791181	0.791181	0.792568	0.792568	6.33983e-05	0.7	0.862	0	0.431
98	LG1(K7)	77.986		0.05	4	0.791197	0.791197	0.792557	0.792557	6.34166e-05	0.7	0.985	0	0.492
99	LG1(K7)	78.077	TAA-caga-600	0.05	4	0.7912	0.7912	0.792556	0.792556	6.34195e-05	0.7	1	0	0.5
100	LG1(K7)	79.077		0.09	6	0.790876	0.790876	0.792852	0.792852	6.29043e-05	1.5	0.907	0	0.453
101	LG1(K7)	80.077		0.16	7	0.790486	0.790486	0.793224	0.793224	6.20086e-05	2.9	0.832	0	0.416
102	LG1(K7)	81.077		0.25	9	0.790051	0.790051	0.793654	0.793654	6.06368e-05	5.1	0.775	0	0.387
103	LG1(K7)	82.077		0.35	10	0.789631	0.789631	0.794086	0.794086	5.89193e-05	7.8	0.736	0	0.368
104	LG1(K7)	83.077		0.47	11	0.789304	0.789304	0.794449	0.794449	5.72612e-05	10.4	0.716	0	0.358
105	LG1(K7)	84.077		0.58	10	0.789102	0.789102	0.794708	0.794708	5.60211e-05	12.3	0.713	0	0.356
106	LG1(K7)	85.077		0.68	9	0.789015	0.789015	0.794874	0.794874	5.52936e-05	13.4	0.728	0	0.364
107	LG1(K7)	86.077		0.76	9	0.789018	0.789018	0.794967	0.794967	5.50288e-05	13.8	0.762	0	0.381
108	LG1(K7)	87.077		0.82	8	0.789092	0.789092	0.795004	0.795004	5.51478e-05	13.7	0.814	0	0.407
109	LG1(K7)	88.077		0.86	7	0.789221	0.789221	0.794996	0.794996	5.55668e-05	13	0.883	0	0.442
110	LG1(K7)	89.077		0.89	5	0.789391	0.789391	0.794952	0.794952	5.61993e-05	12	0.972	0	0.486
111	LG1(K7)	89.361	GTT-caat-120	0.89	4	0.789444	0.789444	0.794933	0.794933	5.64054e-05	11.7	1	0	0.5
112	LG2(K7)	0	TAA-cggg	0.06	4	0.791316	0.791316	0.792786	0.792786	6.33473e-05	0.8	1	0	0.5
113	LG2(K7)	1		0.03	4	0.791461	0.791461	0.79255	0.79255	6.35829e-05	0.5	0.976	0	0.488
114	LG2(K7)	1.886	AAC-ccgt180	0.01	4	0.791611	0.791611	0.792333	0.792333	6.37458e-05	0.2	1	0	0.5
115	LG2(K7)	2.886		0.02	4	0.791581	0.791581	0.792387	0.792387	6.37147e-05	0.3	0.968	0	0.484
116	LG2(K7)	3.886		0.02	4	0.791553	0.791553	0.792443	0.792443	6.36805e-05	0.3	0.968	0	0.484
117	LG2(K7)	4.886		0.03	4	0.791526	0.791526	0.7925	0.7925	6.36437e-05	0.4	1	0	0.5
118	LG2(K7)	4.891	TAC-ccag-250	0.03	4	0.791526	0.791526	0.7925	0.7925	6.36435e-05	0.4	1	0	0.5
119	LG2(K7)	5.891		0.02	4	0.791549	0.791549	0.792471	0.792471	6.36676e-05	0.3	0.962	0	0.481
120	LG2(K7)	6.891		0.02	5	0.791575	0.791575	0.792437	0.792437	6.36934e-05	0.3	0.928	0	0.464
121	LG2(K7)	7.891		0.02	5	0.791603	0.791603	0.792399	0.792399	6.37206e-05	0.2	0.897	0	0.449
122	LG2(K7)	8.891		0.01	5	0.791636	0.791636	0.792357	0.792357	6.37483e-05	0.2	0.87	0	0.435
123	LG2(K7)	9.891		0.01	5	0.791671	0.791671	0.792309	0.792309	6.37759e-05	0.2	0.846	0	0.423
124	LG2(K7)	10.891		0.01	5	0.79171	0.79171	0.792257	0.792257	6.38022e-05	0.1	0.825	0	0.413
125	LG2(K7)	11.891		0	5	0.791752	0.791752	0.792201	0.792201	6.38261e-05	0.1	0.808	0	0.404
126	LG2(K7)	12.891		0	5	0.791796	0.791796	0.79214	0.79214	6.38464e-05	0	0.794	0	0.397
127	LG2(K7)	13.891		0	5	0.791843	0.791843	0.792075	0.792075	6.3862e-05	0	0.783	0	0.391
128	LG2(K7)	14.891		0	5	0.791891	0.791891	0.792008	0.792008	6.38718e-05	0	0.775	0	0.388
129	LG2(K7)	15.891		0	2	0.79194	0.79194	0.791938	0.791938	6.38751e-05	0	0.771	0	0.385
130	LG2(K7)	16.891		0	5	0.79199	0.79199	0.791867	0.791867	6.38715e-05	0	0.769	0	0.385
131	LG2(K7)	17.891		0	5	0.792039	0.792039	0.791796	0.791796	6.38608e-05	0	0.771	0	0.386
132	LG2(K7)	18.891		0	6	0.792087	0.792087	0.791726	0.791726	6.38436e-05	0	0.776	0	0.388
133	LG2(K7)	19.891		0	6	0.792133	0.792133	0.791657	0.791657	6.38206e-05	0.1	0.785	0	0.392
134	LG2(K7)	20.891		0.01	6	0.792176	0.792176	0.791592	0.791592	6.37929e-05	0.1	0.796	0	0.398
135	LG2(K7)	21.891		0.01	6	0.792217	0.792217	0.79153	0.79153	6.37617e-05	0.2	0.811	0	0.405
136	LG2(K7)	22.891		0.01	6	0.792254	0.792254	0.791473	0.791473	6.37284e-05	0.2	0.829	0	0.414
137	LG2(K7)	23.891		0.02	5	0.792287	0.792287	0.79142	0.79142	6.36944e-05	0.3	0.85	0	0.425
138	LG2(K7)	24.891		0.02	5	0.792317	0.792317	0.791371	0.791371	6.36606e-05	0.3	0.875	0	0.437
139	LG2(K7)	25.891		0.02	5	0.792344	0.792344	0.791328	0.791328	6.3628e-05	0.4	0.902	0	0.451
140	LG2(K7)	26.891		0.03	5	0.792366	0.792366	0.791289	0.791289	6.35975e-05	0.4	0.934	0	0.467
141	LG2(K7)	27.891		0.03	4	0.792386	0.792386	0.791256	0.791256	6.35696e-05	0.5	0.969	0	0.484
142	LG2(K7)	28.72	GTA-cggt-350	0.04	4	0.7924	0.7924	0.791231	0.791231	6.35487e-05	0.5	1	0	0.5
143	LG2(K7)	29.72		0.01	4	0.79221	0.79221	0.791523	0.791523	6.37623e-05	0.2	0.964	0	0.482
144	LG2(K7)	30.72		0	4	0.791996	0.791996	0.791852	0.791852	6.38701e-05	0	0.952	0	0.476
145	LG2(K7)	31.72		0	4	0.791781	0.791781	0.792183	0.792183	6.38365e-05	0.1	0.965	0	0.483
146	LG2(K7)	32.646	GTA-ccaa-150	0.02	4	0.7916	0.7916	0.792462	0.792462	6.36979e-05	0.3	1	0	0.5
147	LG2(K7)	32.646	TAA-ccta-120	0.02	4	0.7916	0.7916	0.792462	0.792462	6.36979e-05	0.3	1	0	0.5
148	LG2(K7)	33.646		0.01	4	0.791754	0.791754	0.792206	0.792206	6.38258e-05	0.1	0.965	0	0.482
149	LG2(K7)	34.646		0	3	0.791942	0.791942	0.791936	0.791936	6.38751e-05	0	0.998	0	0.499
150	LG2(K7)	34.678	LmSSR2-11G	0	3	0.791947	0.791947	0.791929	0.791929	6.3875e-05	0	1	0	0.5
151	LG2(K7)	34.978	GGT-cttt-110	0.04	4	0.791389	0.791389	0.7926	0.7926	6.35114e-05	0.6	1	0	0.5
152	LG2(K7)	35.173	LmSSR9-7G-220*	0.04	4	0.791389	0.791389	0.7926	0.7926	6.35114e-05	0.6	1	0	0.5
153	LG2(K7)	35.173	GTT-cgag-200	0.04	4	0.791389	0.791389	0.7926	0.7926	6.35114e-05	0.6	1	0	0.5
154	LG2(K7)	35.173	TTT-ccca-350	0.04	4	0.791389	0.791389	0.7926	0.7926	6.35114e-05	0.6	1	0	0.5
155	LG2(K7)	35.173	AAG-cacg-410	0.04	4	0.791389	0.791389	0.7926	0.7926	6.35114e-05	0.6	1	0	0.5
156	LG2(K7)	36.14	LmSSR1-10A-280	0.03	4	0.791526	0.791526	0.7925	0.7925	6.36435e-05	0.4	1	0	0.5
157	LG2(K7)	36.432	TTC-cccg-290	0.03	4	0.791526	0.791526	0.7925	0.7925	6.36435e-05	0.4	1	0	0.5
158	LG2(K7)	36.432	AGG-cgtt450	0.03	4	0.791526	0.791526	0.7925	0.7925	6.36435e-05	0.4	1	0	0.5
159	LG2(K7)	36.873	LmSSR15-11G-130	0	3	0.791947	0.791947	0.791929	0.791929	6.3875e-05	0	1	0	0.5
160	LG2(K7)	37.503	TAA-caga-580	0.03	4	0.791526	0.791526	0.7925	0.7925	6.36435e-05	0.4	1	0	0.5
161	LG2(K7)	37.678	GGA-cgaa	0.03	4	0.791526	0.791526	0.7925	0.7925	6.36435e-05	0.4	1	0	0.5
162	LG2(K7)	38.162	GAC-cccc-210	0	3	0.79205	0.79205	0.791769	0.791769	6.38563e-05	0	1	0	0.5
163	LG2(K7)	38.162	ATA-cctt240	0	3	0.79205	0.79205	0.791769	0.791769	6.38563e-05	0	1	0	0.5
164	LG2(K7)	38.162	AGG-cgtt290	0	3	0.79205	0.79205	0.791769	0.791769	6.38563e-05	0	1	0	0.5
165	LG2(K7)	38.881	LmSSR4-8H	0.03	4	0.792369	0.792369	0.791357	0.791357	6.36252e-05	0.4	1	0	0.5
166	LG2(K7)	39.881		0	4	0.791826	0.791826	0.792094	0.792094	6.38576e-05	0	0.957	0	0.478
167	LG2(K7)	40.453	LmSSRHL5D12*	0.03	4	0.791526	0.791526	0.7925	0.7925	6.36435e-05	0.4	1	0	0.5
168	LG2(K7)	40.927	CaiSSRD02N07	0.03	4	0.791526	0.791526	0.7925	0.7925	6.36435e-05	0.4	1	0	0.5
169	LG2(K7)	41.207	LmSSR13-11B*	0	3	0.792056	0.792056	0.7918	0.7918	6.38589e-05	0	1	0	0.5
170	LG2(K7)	42.03	TTT-ccgt	0.03	4	0.791526	0.791526	0.7925	0.7925	6.36435e-05	0.4	1	0	0.5
171	LG2(K7)	43.003	ATT-cgtt500	0.03	4	0.791526	0.791526	0.7925	0.7925	6.36435e-05	0.4	1	0	0.5
172	LG2(K7)	44.003		0.03	4	0.791526	0.791526	0.7925	0.7925	6.36433e-05	0.4	0.951	0	0.476
173	LG2(K7)	45.003		0.03	4	0.791526	0.791526	0.7925	0.7925	6.36433e-05	0.4	0.942	0	0.471
174	LG2(K7)	46.003		0.03	4	0.791526	0.791526	0.7925	0.7925	6.36434e-05	0.4	0.973	0	0.487
175	LG2(K7)	46.449	TTG-ctcg-140	0.03	4	0.791526	0.791526	0.7925	0.7925	6.36435e-05	0.4	1	0	0.5
176	LG3(K7)	0	LmSSR1-10A-220	0.07	4	0.792706	0.792706	0.791125	0.791125	6.32509e-05	1	1	0	0.5
177	LG3(K7)	1		0.04	4	0.792529	0.792529	0.791336	0.791336	6.35193e-05	0.6	0.967	0	0.484
178	LG3(K7)	2		0.01	4	0.79231	0.79231	0.791578	0.791578	6.37412e-05	0.2	0.971	0	0.486
179	LG3(K7)	2.781	ATG-caag-280	0	4	0.792125	0.792125	0.791765	0.791765	6.38427e-05	0.1	1	0	0.5
180	LG3(K7)	3.781		0	4	0.792165	0.792165	0.791728	0.791728	6.38274e-05	0.1	0.958	0	0.479
181	LG3(K7)	4.781		0.01	5	0.79221	0.79221	0.791689	0.791689	6.38075e-05	0.1	0.922	0	0.461
182	LG3(K7)	5.781		0.01	5	0.792257	0.792257	0.791648	0.791648	6.37825e-05	0.1	0.892	0	0.446
183	LG3(K7)	6.781		0.01	6	0.792306	0.792306	0.791605	0.791605	6.37525e-05	0.2	0.868	0	0.434
184	LG3(K7)	7.781		0.01	6	0.792356	0.792356	0.791563	0.791563	6.37184e-05	0.2	0.849	0	0.425
185	LG3(K7)	8.781		0.02	7	0.792404	0.792404	0.791524	0.791524	6.36818e-05	0.3	0.837	0	0.418
186	LG3(K7)	9.781		0.02	7	0.792449	0.792449	0.791488	0.791488	6.36452e-05	0.4	0.83	0	0.415
187	LG3(K7)	10.781		0.02	7	0.792487	0.792487	0.791458	0.791458	6.36112e-05	0.4	0.829	0	0.415
188	LG3(K7)	11.781		0.02	7	0.792518	0.792518	0.791434	0.791434	6.35827e-05	0.5	0.834	0	0.417
189	LG3(K7)	12.781		0.03	7	0.792541	0.792541	0.791418	0.791418	6.35616e-05	0.5	0.845	0	0.423
190	LG3(K7)	13.781		0.03	6	0.792555	0.792555	0.79141	0.79141	6.35492e-05	0.5	0.862	0	0.431
191	LG3(K7)	14.781		0.03	6	0.792561	0.792561	0.791409	0.791409	6.35455e-05	0.5	0.884	0	0.442
192	LG3(K7)	15.781		0.03	5	0.792559	0.792559	0.791415	0.791415	6.35498e-05	0.5	0.912	0	0.456
193	LG3(K7)	16.781		0.03	5	0.792551	0.792551	0.791425	0.791425	6.35606e-05	0.5	0.947	0	0.473
194	LG3(K7)	17.781		0.03	4	0.792538	0.792538	0.79144	0.79144	6.35763e-05	0.5	0.987	0	0.494
195	LG3(K7)	18.053	TAT-cctt-130	0.03	4	0.792533	0.792533	0.791444	0.791444	6.35811e-05	0.5	0.999	0	0.5
196	LG3(K7)	19.053		0.03	4	0.792573	0.792573	0.791426	0.791426	6.35501e-05	0.5	0.965	0	0.482
197	LG3(K7)	20.053		0.04	5	0.792611	0.792611	0.79141	0.79141	6.35197e-05	0.6	0.937	0	0.468
198	LG3(K7)	21.053		0.04	5	0.792647	0.792647	0.791397	0.791397	6.34915e-05	0.6	0.914	0	0.457
199	LG3(K7)	22.053		0.04	5	0.79268	0.79268	0.791388	0.791388	6.34666e-05	0.6	0.897	0	0.449
200	LG3(K7)	23.053		0.04	5	0.792709	0.792709	0.791382	0.791382	6.34465e-05	0.7	0.886	0	0.443
201	LG3(K7)	24.053		0.04	6	0.792733	0.792733	0.791381	0.791381	6.3432e-05	0.7	0.881	0	0.44
202	LG3(K7)	25.053		0.04	5	0.792752	0.792752	0.791384	0.791384	6.34241e-05	0.7	0.881	0	0.44
203	LG3(K7)	26.053		0.04	5	0.792765	0.792765	0.791391	0.791391	6.34228e-05	0.7	0.887	0	0.443
204	LG3(K7)	27.053		0.04	5	0.792772	0.792772	0.791403	0.791403	6.34281e-05	0.7	0.899	0	0.449
205	LG3(K7)	28.053		0.04	5	0.792774	0.792774	0.791417	0.791417	6.34395e-05	0.7	0.916	0	0.458
206	LG3(K7)	29.053		0.04	5	0.79277	0.79277	0.791435	0.791435	6.34562e-05	0.7	0.939	0	0.47
207	LG3(K7)	30.053		0.04	4	0.792762	0.792762	0.791455	0.791455	6.34772e-05	0.6	0.968	0	0.484
208	LG3(K7)	30.984	GTT-ccat-210	0.04	4	0.79275	0.79275	0.791476	0.791476	6.34996e-05	0.6	1	0	0.5
209	LG3(K7)	31.984		0.03	5	0.792697	0.792697	0.791503	0.791503	6.35447e-05	0.5	0.934	0	0.467
210	LG3(K7)	32.984		0.02	6	0.792612	0.792612	0.791551	0.791551	6.36137e-05	0.4	0.882	0	0.441
211	LG3(K7)	33.984		0.01	7	0.792488	0.792488	0.791622	0.791622	6.37012e-05	0.3	0.843	0	0.421
212	LG3(K7)	34.984		0.01	7	0.792321	0.792321	0.791719	0.791719	6.3791e-05	0.1	0.817	0	0.409
213	LG3(K7)	35.984		0	6	0.792118	0.792118	0.791836	0.791836	6.38567e-05	0	0.806	0	0.403
214	LG3(K7)	36.984		0	5	0.7919	0.7919	0.791962	0.791962	6.38742e-05	0	0.807	0	0.404
215	LG3(K7)	37.984		0	6	0.791692	0.791692	0.792081	0.792081	6.38401e-05	0.1	0.822	0	0.411
216	LG3(K7)	38.984		0.01	6	0.791517	0.791517	0.79218	0.79218	6.37735e-05	0.2	0.851	0	0.425
217	LG3(K7)	39.984		0.02	6	0.791385	0.791385	0.792255	0.792255	6.37002e-05	0.3	0.892	0	0.446
218	LG3(K7)	40.984		0.02	5	0.791295	0.791295	0.792307	0.792307	6.36385e-05	0.4	0.948	0	0.474
219	LG3(K7)	41.755	LmSSR1-8H-600	0.03	4	0.79125	0.79125	0.792333	0.792333	6.36035e-05	0.4	1	0	0.5
220	LG3(K7)	42.755		0.02	5	0.791338	0.791338	0.792298	0.792298	6.36593e-05	0.3	0.947	0	0.474
221	LG3(K7)	43.755		0.01	5	0.791469	0.791469	0.792234	0.792234	6.37364e-05	0.2	0.92	0	0.46
222	LG3(K7)	44.755		0.01	5	0.791626	0.791626	0.792147	0.792147	6.38101e-05	0.1	0.919	0	0.459
223	LG3(K7)	45.755		0	4	0.791782	0.791782	0.792049	0.792049	6.38579e-05	0	0.943	0	0.472
224	LG3(K7)	46.755		0	3	0.791916	0.791916	0.791956	0.791956	6.38747e-05	0	0.993	0	0.497
225	LG3(K7)	46.861	GCG-cgcg-250	0	3	0.791929	0.791929	0.791947	0.791947	6.3875e-05	0	1	0	0.5
226	LG3(K7)	47.028	LmSSR18-11E	0.07	4	0.791067	0.791067	0.792667	0.792667	6.32404e-05	1	1	0	0.5
227	LG3(K7)	47.951	CaiSSRB08J20	0.5	4	0.789667	0.789667	0.793833	0.793833	5.95707e-05	6.7	1	0	0.5
228	LG3(K7)	48.697	TAA-caga-250	0.23	4	0.790286	0.790286	0.793158	0.793158	6.18601e-05	3.2	1	0	0.5
229	LG3(K7)	49.559	ATA-caaa-250	0.49	4	0.789385	0.789385	0.7936	0.7936	5.96326e-05	6.6	1	0	0.5
230	LG3(K7)	50.118	TTC-cgtc-160	0.19	4	0.79025	0.79025	0.792905	0.792905	6.22442e-05	2.6	1	0	0.5
231	LG3(K7)	50.989	TAC-ccag-280	0.1	4	0.790769	0.790769	0.7927	0.7927	6.29851e-05	1.4	1	0	0.5
232	LG3(K7)	51.529	ATA-ccct190	0.41	4	0.789615	0.789615	0.79345	0.79345	6.03645e-05	5.5	1	0	0.5
233	LG3(K7)	52.529		0.38	5	0.789664	0.789664	0.793455	0.793455	6.04249e-05	5.4	0.909	0	0.455
234	LG3(K7)	53.529		0.34	5	0.789767	0.789767	0.793391	0.793391	6.07204e-05	4.9	0.901	0	0.451
235	LG3(K7)	54.529		0.29	4	0.789954	0.789954	0.793239	0.793239	6.12956e-05	4	0.977	0	0.488
236	LG3(K7)	54.717	GCA-cgca	0.28	4	0.79	0.79	0.7932	0.7932	6.14303e-05	3.8	1	0	0.5
237	LG3(K7)	55.679	LmSSR15-9D-490*	1.28	4	0.787364	0.787364	0.794227	0.794227	5.34063e-05	16.4	1	0	0.5
238	LG3(K7)	56.679		0.27	5	0.789873	0.789873	0.793115	0.793115	6.14451e-05	3.8	0.993	0	0.496
239	LG3(K7)	56.712	ATT-cgtt190	0.25	4	0.79	0.79	0.793048	0.793048	6.17258e-05	3.4	1	0	0.5
240	LG3(K7)	57.712		0.25	4	0.79	0.79	0.793048	0.793048	6.17257e-05	3.4	0.994	0	0.497
241	LG3(K7)	57.887	TAT-cctt-310	0.25	4	0.79	0.79	0.793048	0.793048	6.17258e-05	3.4	1	0	0.5
242	LG3(K7)	57.911	ATC-caac-260	0.25	4	0.79	0.79	0.793048	0.793048	6.17258e-05	3.4	1	0	0.5
243	LG3(K7)	57.911	TTA-cgtg-170	0.25	4	0.79	0.79	0.793048	0.793048	6.17258e-05	3.4	1	0	0.5
244	LG3(K7)	57.957	TAG-cgga-100	0.32	5	0.789717	0.789717	0.793263	0.793263	6.09335e-05	4.6	0.993	0	0.497
245	LG3(K7)	58.162	TAC-ccag-70	0.59	4	0.789154	0.789154	0.79375	0.79375	5.88316e-05	7.9	1	0	0.5
246	LG3(K7)	59.162		0.46	6	0.789217	0.789217	0.793615	0.793615	5.93149e-05	7.1	0.936	0	0.468
247	LG3(K7)	60.162		0.29	6	0.789687	0.789687	0.793272	0.793272	6.08726e-05	4.7	0.941	0	0.47
248	LG3(K7)	61.016	LmSSR18-10D	0.15	4	0.790417	0.790417	0.79281	0.79281	6.25501e-05	2.1	1	0	0.5
249	LG3(K7)	62.016		0.23	5	0.78999	0.78999	0.793032	0.793032	6.17441e-05	3.3	0.963	0	0.482
250	LG3(K7)	62.382	LmSSRS393D1-260*	0.25	4	0.79	0.79	0.793048	0.793048	6.17258e-05	3.4	1	0	0.5
251	LG3(K7)	62.382	LmSSRH1-2G	0.25	4	0.79	0.79	0.793048	0.793048	6.17258e-05	3.4	1	0	0.5
252	LG3(K7)	63.382		0.5	5	0.789277	0.789277	0.793636	0.793636	5.93577e-05	7.1	0.98	0	0.49
253	LG3(K7)	63.843	GGG-cgag-490	0.59	4	0.789154	0.789154	0.79375	0.79375	5.88316e-05	7.9	1	0	0.5
254	LG3(K7)	64.347	LmSSR12-6B*	0.29	4	0.790071	0.790071	0.793316	0.793316	6.13041e-05	4	1	0	0.5
255	LG3(K7)	65.347		0.08	4	0.79097	0.79097	0.792657	0.792657	6.31797e-05	1.1	0.974	0	0.487
256	LG3(K7)	65.491	LmSSR9-7B	0.05	4	0.791143	0.791143	0.792526	0.792526	6.34076e-05	0.7	1	0	0.5
257	LG3(K7)	66.343	GTG-caag-310	0.41	4	0.789273	0.789273	0.793273	0.793273	6.03196e-05	5.6	1	0	0.5
258	LG3(K7)	67.343		0.24	5	0.790004	0.790004	0.793045	0.793045	6.17345e-05	3.4	0.987	0	0.494
259	LG3(K7)	67.379	TCC-catc-200	0.22	4	0.790083	0.790083	0.793	0.793	6.19066e-05	3.1	1	0	0.5
260	LG3(K7)	68.379		0.41	7	0.789228	0.789228	0.793569	0.793569	5.94573e-05	6.9	0.915	0	0.457
261	LG3(K7)	69.379		0.55	7	0.788859	0.788859	0.793797	0.793797	5.81527e-05	9	0.92	0	0.46
262	LG3(K7)	70.257	ATT-cgtt310	0.58	4	0.789	0.789	0.793619	0.793619	5.8938e-05	7.7	1	0	0.5
263	LG3(K7)	71.257		0.66	4	0.788627	0.788627	0.793634	0.793634	5.82634e-05	8.8	0.992	0	0.496
264	LG3(K7)	71.515	LmSSR13-8B	0.68	4	0.788545	0.788545	0.793636	0.793636	5.81157e-05	9	1	0	0.5
265	LG3(K7)	72.125	AAT-ccgt290	0.68	4	0.788545	0.788545	0.793636	0.793636	5.81157e-05	9	1	0	0.5
266	LG3(K7)	73.042	GAA-ctaa-255	0.73	4	0.788846	0.788846	0.79395	0.79395	5.76558e-05	9.7	1	0	0.5
267	LG3(K7)	74.042		0.73	4	0.788846	0.788846	0.79395	0.79395	5.7655e-05	9.7	0.991	0	0.496
268	LG3(K7)	74.355	GTG-cttt	0.73	4	0.788846	0.788846	0.79395	0.79395	5.76558e-05	9.7	1	0	0.5
269	LG3(K7)	75.355		0.82	6	0.788287	0.788287	0.794097	0.794097	5.59927e-05	12.3	0.936	0	0.468
270	LG3(K7)	76.355		0.8	6	0.788192	0.788192	0.79401	0.79401	5.61161e-05	12.1	0.939	0	0.47
271	LG3(K7)	77.263	LmSSR15-10H*	0.68	4	0.788545	0.788545	0.793636	0.793636	5.81157e-05	9	1	0	0.5
272	LG3(K7)	78.263		1.22	4	0.787751	0.787751	0.794332	0.794332	5.38514e-05	15.7	0.999	0	0.499
273	LG3(K7)	78.268	ATT-caat-300	1.22	4	0.78775	0.78775	0.794333	0.794333	5.3846e-05	15.7	1	0	0.5
274	LG3(K7)	79.268		1.17	5	0.787762	0.787762	0.794264	0.794264	5.41652e-05	15.2	0.931	0	0.466
275	LG3(K7)	80.268		1.11	5	0.787779	0.787779	0.794172	0.794172	5.45865e-05	14.5	0.92	0	0.46
276	LG3(K7)	81.268		1.05	5	0.787805	0.787805	0.794053	0.794053	5.51368e-05	13.7	0.967	0	0.484
277	LG3(K7)	81.645	LmSSR2-12F180	1.02	4	0.787818	0.787818	0.794	0.794	5.53829e-05	13.3	1	0	0.5
278	LG3(K7)	82.645		0.75	6	0.788426	0.788426	0.793971	0.793971	5.67366e-05	11.2	0.849	0	0.424
279	LG3(K7)	83.645		0.45	6	0.789365	0.789365	0.793661	0.793661	5.94419e-05	6.9	0.87	0	0.435
280	LG3(K7)	84.395	LmSSRH17-1G	0.25	4	0.790214	0.790214	0.793211	0.793211	6.16823e-05	3.4	1	0	0.5
281	LG3(K7)	85.395		0.27	6	0.790038	0.790038	0.793318	0.793318	6.12543e-05	4.1	0.94	0	0.47
282	LG3(K7)	86.395		0.29	7	0.789848	0.789848	0.79343	0.79343	6.07573e-05	4.9	0.888	0	0.444
283	LG3(K7)	87.395		0.32	8	0.789648	0.789648	0.793544	0.793544	6.01971e-05	5.8	0.842	0	0.421
284	LG3(K7)	88.395		0.34	9	0.789443	0.789443	0.793656	0.793656	5.95905e-05	6.7	0.804	0	0.402
285	LG3(K7)	89.395		0.36	10	0.789241	0.789241	0.793758	0.793758	5.89674e-05	7.7	0.774	0	0.387
286	LG3(K7)	90.395		0.38	10	0.789054	0.789054	0.793847	0.793847	5.83706e-05	8.6	0.75	0	0.375
287	LG3(K7)	91.395		0.4	11	0.78889	0.78889	0.793916	0.793916	5.78468e-05	9.4	0.733	0	0.367
288	LG3(K7)	92.395		0.41	12	0.78876	0.78876	0.793961	0.793961	5.74484e-05	10.1	0.724	0	0.362
289	LG3(K7)	93.395		0.41	12	0.788677	0.788677	0.793977	0.793977	5.7227e-05	10.4	0.721	0	0.361
290	LG3(K7)	94.395		0.4	13	0.78865	0.78865	0.793961	0.793961	5.7225e-05	10.4	0.726	0	0.363
291	LG3(K7)	95.395		0.39	13	0.788692	0.788692	0.793908	0.793908	5.74837e-05	10	0.738	0	0.369
292	LG3(K7)	96.395		0.36	12	0.788813	0.788813	0.793813	0.793813	5.80182e-05	9.2	0.756	0	0.378
293	LG3(K7)	97.395		0.33	12	0.789012	0.789012	0.793678	0.793678	5.87864e-05	8	0.782	0	0.391
294	LG3(K7)	98.395		0.3	10	0.789272	0.789272	0.793512	0.793512	5.9682e-05	6.6	0.815	0	0.407
295	LG3(K7)	99.395		0.26	9	0.789558	0.789558	0.793333	0.793333	6.05559e-05	5.2	0.855	0	0.428
296	LG3(K7)	100.395		0.23	7	0.789837	0.789837	0.79316	0.79316	6.13087e-05	4	0.902	0	0.451
297	LG3(K7)	101.395		0.2	5	0.790091	0.790091	0.793003	0.793003	6.19081e-05	3.1	0.957	0	0.479
298	LG3(K7)	102.099	GTA-cact-50	0.19	4	0.79025	0.79025	0.792905	0.792905	6.22442e-05	2.6	1	0	0.5
299	LG3(K7)	103.099		0.19	5	0.790173	0.790173	0.79294	0.79294	6.21077e-05	2.8	0.966	0	0.483
300	LG3(K7)	104.099		0.2	5	0.790102	0.790102	0.792971	0.792971	6.19809e-05	3	0.938	0	0.469
301	LG3(K7)	105.099		0.2	6	0.790041	0.790041	0.792996	0.792996	6.18697e-05	3.1	0.915	0	0.458
302	LG3(K7)	106.099		0.21	6	0.789991	0.789991	0.793015	0.793015	6.17796e-05	3.3	0.898	0	0.449
303	LG3(K7)	107.099		0.21	6	0.789954	0.789954	0.793027	0.793027	6.17156e-05	3.4	0.887	0	0.443
304	LG3(K7)	108.099		0.21	6	0.78993	0.78993	0.793031	0.793031	6.16817e-05	3.4	0.881	0	0.441
305	LG3(K7)	109.099		0.21	6	0.789921	0.789921	0.793026	0.793026	6.16806e-05	3.4	0.881	0	0.44
306	LG3(K7)	110.099		0.21	6	0.789927	0.789927	0.793013	0.793013	6.1714e-05	3.4	0.886	0	0.443
307	LG3(K7)	111.099		0.2	6	0.789948	0.789948	0.792991	0.792991	6.17816e-05	3.3	0.898	0	0.449
308	LG3(K7)	112.099		0.2	6	0.789985	0.789985	0.79296	0.79296	6.18816e-05	3.1	0.914	0	0.457
309	LG3(K7)	113.099		0.19	5	0.790037	0.790037	0.79292	0.79292	6.20098e-05	2.9	0.937	0	0.468
310	LG3(K7)	114.099		0.18	5	0.790102	0.790102	0.792873	0.792873	6.216e-05	2.7	0.965	0	0.482
311	LG3(K7)	115.099		0.18	4	0.790179	0.790179	0.79282	0.79282	6.23243e-05	2.4	0.999	0	0.499
312	LG3(K7)	115.136	GGG-cgag-520	0.18	4	0.790182	0.790182	0.792818	0.792818	6.23306e-05	2.4	1	0	0.5
313	LG3(K7)	116.136		0.17	5	0.79019	0.79019	0.792841	0.792841	6.22984e-05	2.5	0.962	0	0.481
314	LG3(K7)	117.136		0.17	5	0.790202	0.790202	0.792862	0.792862	6.2273e-05	2.5	0.927	0	0.463
315	LG3(K7)	118.136		0.16	6	0.790218	0.790218	0.792881	0.792881	6.22552e-05	2.5	0.895	0	0.447
316	LG3(K7)	119.136		0.16	6	0.790238	0.790238	0.792897	0.792897	6.22458e-05	2.6	0.865	0	0.433
317	LG3(K7)	120.136		0.15	6	0.790263	0.790263	0.792911	0.792911	6.22454e-05	2.6	0.838	0	0.419
318	LG3(K7)	121.136		0.15	7	0.790291	0.790291	0.792923	0.792923	6.22543e-05	2.5	0.814	0	0.407
319	LG3(K7)	122.136		0.14	7	0.790324	0.790324	0.792931	0.792931	6.22731e-05	2.5	0.793	0	0.396
320	LG3(K7)	123.136		0.14	7	0.790362	0.790362	0.792937	0.792937	6.23018e-05	2.5	0.774	0	0.387
321	LG3(K7)	124.136		0.13	7	0.790403	0.790403	0.792939	0.792939	6.23401e-05	2.4	0.758	0	0.379
322	LG3(K7)	125.136		0.12	7	0.790449	0.790449	0.792937	0.792937	6.23878e-05	2.3	0.744	0	0.372
323	LG3(K7)	126.136		0.12	7	0.790498	0.790498	0.792932	0.792932	6.2444e-05	2.2	0.733	0	0.366
324	LG3(K7)	127.136		0.11	7	0.790551	0.790551	0.792924	0.792924	6.2508e-05	2.1	0.724	0	0.362
325	LG3(K7)	128.136		0.11	8	0.790606	0.790606	0.792912	0.792912	6.25783e-05	2	0.718	0	0.359
326	LG3(K7)	129.136		0.1	8	0.790664	0.790664	0.792897	0.792897	6.26543e-05	1.9	0.714	0	0.357
327	LG3(K7)	130.136		0.09	7	0.790725	0.790725	0.792878	0.792878	6.27347e-05	1.8	0.713	0	0.357
328	LG3(K7)	131.136		0.09	7	0.790787	0.790787	0.792857	0.792857	6.28174e-05	1.7	0.714	0	0.357
329	LG3(K7)	132.136		0.08	7	0.790849	0.790849	0.792833	0.792833	6.29013e-05	1.5	0.718	0	0.359
330	LG3(K7)	133.136		0.07	7	0.790912	0.790912	0.792806	0.792806	6.29851e-05	1.4	0.724	0	0.362
331	LG3(K7)	134.136		0.07	7	0.790975	0.790975	0.792777	0.792777	6.30676e-05	1.3	0.733	0	0.366
332	LG3(K7)	135.136		0.06	7	0.791038	0.791038	0.792746	0.792746	6.31477e-05	1.1	0.744	0	0.372
333	LG3(K7)	136.136		0.06	7	0.791099	0.791099	0.792714	0.792714	6.32244e-05	1	0.758	0	0.379
334	LG3(K7)	137.136		0.05	6	0.791159	0.791159	0.79268	0.79268	6.32972e-05	0.9	0.774	0	0.387
335	LG3(K7)	138.136		0.05	6	0.791217	0.791217	0.792645	0.792645	6.33651e-05	0.8	0.793	0	0.397
336	LG3(K7)	139.136		0.04	6	0.791273	0.791273	0.79261	0.79261	6.34281e-05	0.7	0.815	0	0.407
337	LG3(K7)	140.136		0.04	6	0.791327	0.791327	0.792575	0.792575	6.34859e-05	0.6	0.839	0	0.419
338	LG3(K7)	141.136		0.03	5	0.791378	0.791378	0.792539	0.792539	6.35385e-05	0.5	0.865	0	0.433
339	LG3(K7)	142.136		0.03	5	0.791426	0.791426	0.792503	0.792503	6.35858e-05	0.5	0.895	0	0.448
340	LG3(K7)	143.136		0.03	5	0.791472	0.791472	0.792468	0.792468	6.36281e-05	0.4	0.927	0	0.464
341	LG3(K7)	144.136		0.02	4	0.791515	0.791515	0.792434	0.792434	6.36656e-05	0.3	0.962	0	0.481
342	LG3(K7)	145.125	TTA-ccga-190	0.02	4	0.791556	0.791556	0.7924	0.7924	6.36983e-05	0.3	1	0	0.5
343	LG4(K7)	0	GTG-cgct-160	0.28	4	0.790412	0.790412	0.793562	0.793562	6.13956e-05	3.9	1	0	0.5
344	LG4(K7)	1		0.8	6	0.789496	0.789496	0.795106	0.795106	5.61365e-05	12.1	0.931	0	0.466
345	LG4(K7)	1.775	GTT-ccat-150	1.13	4	0.789316	0.789316	0.7955	0.7955	5.45335e-05	14.6	1	0	0.5
346	LG4(K7)	2.775		1.11	5	0.789308	0.789308	0.795442	0.795442	5.46578e-05	14.4	0.955	0	0.477
347	LG4(K7)	3.775		1.09	5	0.7893	0.7893	0.795377	0.795377	5.48019e-05	14.2	0.931	0	0.466
348	LG4(K7)	4.775		1.07	5	0.789293	0.789293	0.795306	0.795306	5.49653e-05	13.9	0.93	0	0.465
349	LG4(K7)	5.775		1.05	5	0.789286	0.789286	0.795228	0.795228	5.51472e-05	13.7	0.95	0	0.475
350	LG4(K7)	6.775		1.03	4	0.789279	0.789279	0.795145	0.795145	5.5346e-05	13.4	0.993	0	0.496
351	LG4(K7)	6.91	TAA-ccta-360	1.02	4	0.789278	0.789278	0.795133	0.795133	5.53741e-05	13.3	1	0	0.5
352	LG4(K7)	7.91		1.02	4	0.789277	0.789277	0.795134	0.795134	5.53692e-05	13.3	0.977	0	0.489
353	LG4(K7)	8.91		1.02	4	0.789277	0.789277	0.795134	0.795134	5.53708e-05	13.3	0.985	0	0.492
354	LG4(K7)	9.422	TAG-ctgg-185	1.02	4	0.789278	0.789278	0.795133	0.795133	5.53741e-05	13.3	1	0	0.5
355	LG4(K7)	10.284	TGA-cgga-120	1.02	4	0.789278	0.789278	0.795133	0.795133	5.53741e-05	13.3	1	0	0.5
356	LG4(K7)	11.284		1.02	4	0.789277	0.789277	0.795134	0.795134	5.53702e-05	13.3	0.965	0	0.482
357	LG4(K7)	12.284		1.02	4	0.789278	0.789278	0.795134	0.795134	5.53728e-05	13.3	0.989	0	0.494
358	LG4(K7)	12.476	GTT-ccat-220	1.02	4	0.789278	0.789278	0.795133	0.795133	5.53741e-05	13.3	1	0	0.5
359	LG4(K7)	13.476		0.98	5	0.789347	0.789347	0.795114	0.795114	5.56449e-05	12.9	0.904	0	0.452
360	LG4(K7)	14.476		0.93	5	0.789434	0.789434	0.795087	0.795087	5.59875e-05	12.3	0.871	0	0.435
361	LG4(K7)	15.476		0.88	5	0.789542	0.789542	0.795051	0.795051	5.6416e-05	11.7	0.9	0	0.45
362	LG4(K7)	16.476		0.82	4	0.789676	0.789676	0.795003	0.795003	5.69416e-05	10.9	0.993	0	0.497
363	LG4(K7)	16.53	LmSSR11-3E-210*	0.82	4	0.789684	0.789684	0.795	0.795	5.69729e-05	10.8	1	0	0.5
364	LG4(K7)	17.53		0.93	5	0.789428	0.789428	0.795088	0.795088	5.59663e-05	12.4	0.965	0	0.482
365	LG4(K7)	18.429	ATA-cctt90	1.02	4	0.789278	0.789278	0.795133	0.795133	5.53741e-05	13.3	1	0	0.5
366	LG4(K7)	18.429	TAT-cgtt	1.02	4	0.789278	0.789278	0.795133	0.795133	5.53741e-05	13.3	1	0	0.5
367	LG4(K7)	18.51	ATC-cggt290	1.02	4	0.789278	0.789278	0.795133	0.795133	5.53741e-05	13.3	1	0	0.5
368	LG4(K7)	18.557	CaiSSRB08G02-140	1.54	4	0.788529	0.788529	0.795562	0.795562	5.15204e-05	19.3	1	0	0.5
369	LG4(K7)	19.506	TTC-ctcc	1.02	4	0.789278	0.789278	0.795133	0.795133	5.53741e-05	13.3	1	0	0.5
370	LG4(K7)	19.506	LmSSR2-7H	1.02	4	0.789278	0.789278	0.795133	0.795133	5.53741e-05	13.3	1	0	0.5
371	LG4(K7)	19.833	ATA-ctaa-170	1.02	4	0.789278	0.789278	0.795133	0.795133	5.53741e-05	13.3	1	0	0.5
372	LG4(K7)	19.834	CaiSSRA01D16	1.02	4	0.789278	0.789278	0.795133	0.795133	5.53741e-05	13.3	1	0	0.5
373	LG4(K7)	20.295	GAC-cgtt-140	1.02	4	0.789278	0.789278	0.795133	0.795133	5.53741e-05	13.3	1	0	0.5
374	LG4(K7)	20.548	LmSSRS393D1-180*	1.02	4	0.789278	0.789278	0.795133	0.795133	5.53741e-05	13.3	1	0	0.5
375	LG4(K7)	20.548	TCA-cata	1.02	4	0.789278	0.789278	0.795133	0.795133	5.53741e-05	13.3	1	0	0.5
376	LG4(K7)	20.548	GAA-cgtg-220	1.02	4	0.789278	0.789278	0.795133	0.795133	5.53741e-05	13.3	1	0	0.5
377	LG4(K7)	20.548	LmSSR16-12B	1.02	4	0.789278	0.789278	0.795133	0.795133	5.53741e-05	13.3	1	0	0.5
378	LG4(K7)	20.688	TAG-cctg-120	1.02	4	0.789278	0.789278	0.795133	0.795133	5.53741e-05	13.3	1	0	0.5
379	LG4(K7)	20.846	ATC-ccat150	1.02	4	0.789278	0.789278	0.795133	0.795133	5.53741e-05	13.3	1	0	0.5
380	LG4(K7)	21.281	GTC-cgct-380	0.62	4	0.789706	0.789706	0.794312	0.794312	5.85748e-05	8.3	1	0	0.5
381	LG4(K7)	21.645	TTT-ctct	1.54	4	0.788529	0.788529	0.795562	0.795562	5.15204e-05	19.3	1	0	0.5
382	LG4(K7)	21.84	ATA-cctt120	1.54	4	0.788529	0.788529	0.795562	0.795562	5.15204e-05	19.3	1	0	0.5
383	LG4(K7)	22.59	ATA-caaa-210	1.27	4	0.788625	0.788625	0.795059	0.795059	5.35361e-05	16.2	1	0	0.5
384	LG4(K7)	22.792	AAC-cacc-250	1.67	4	0.788188	0.788188	0.795471	0.795471	5.06264e-05	20.7	1	0	0.5
385	LG4(K7)	23.324	ATC-cggt190	1.02	4	0.789278	0.789278	0.795133	0.795133	5.53741e-05	13.3	1	0	0.5
386	LG4(K7)	24.324		1.02	4	0.789277	0.789277	0.795134	0.795134	5.53711e-05	13.3	0.93	0	0.465
387	LG4(K7)	25.253	AAC-ccgt200	1.02	4	0.789278	0.789278	0.795133	0.795133	5.53741e-05	13.3	1	0	0.5
388	LG4(K7)	25.253	AAC-ccgt100	1.02	4	0.789278	0.789278	0.795133	0.795133	5.53741e-05	13.3	1	0	0.5
389	LG4(K7)	26.253		0.99	5	0.789335	0.789335	0.795118	0.795118	5.55983e-05	13	0.952	0	0.476
390	LG4(K7)	27.253		0.95	5	0.789406	0.789406	0.795097	0.795097	5.58754e-05	12.5	0.93	0	0.465
391	LG4(K7)	28.253		0.9	5	0.789492	0.789492	0.795069	0.795069	5.62141e-05	12	0.933	0	0.467
392	LG4(K7)	29.253		0.86	5	0.789595	0.789595	0.795033	0.795033	5.66223e-05	11.4	0.962	0	0.481
393	LG4(K7)	29.995	GTT-caat-140	0.82	4	0.789684	0.789684	0.795	0.795	5.69729e-05	10.8	1	0	0.5
394	LG4(K7)	30.995		0.96	5	0.789592	0.789592	0.795403	0.795403	5.57465e-05	12.7	0.942	0	0.471
395	LG4(K7)	31.868	GGT-cgat	1.06	4	0.78955	0.78955	0.795615	0.795615	5.50917e-05	13.8	1	0	0.5
396	LG4(K7)	32.868		1.1	6	0.789314	0.789314	0.79577	0.79577	5.38185e-05	15.7	0.889	0	0.445
397	LG4(K7)	33.868		1.06	7	0.789297	0.789297	0.795746	0.795746	5.38152e-05	15.7	0.86	0	0.43
398	LG4(K7)	34.868		0.93	6	0.789527	0.789527	0.795499	0.795499	5.52891e-05	13.4	0.912	0	0.456
399	LG4(K7)	35.59	TTG-cgta-220	0.8	4	0.78985	0.78985	0.795154	0.795154	5.71589e-05	10.5	1	0	0.5
400	LG5(K7)	0	CaiSSRb120-240	0.12	4	0.792941	0.792941	0.790875	0.790875	6.28088e-05	1.7	1	0	0.5
401	LG5(K7)	0	CaiSSRb120-260	0.12	4	0.792941	0.792941	0.790875	0.790875	6.28088e-05	1.7	1	0	0.5
402	LG5(K7)	1		0.12	4	0.792971	0.792971	0.79085	0.79085	6.27506e-05	1.8	0.973	0	0.486
403	LG5(K7)	2		0.13	4	0.792994	0.792994	0.79083	0.79083	6.27052e-05	1.8	0.956	0	0.478
404	LG5(K7)	3		0.13	4	0.793008	0.793008	0.790816	0.790816	6.26747e-05	1.9	0.95	0	0.475
405	LG5(K7)	4		0.13	4	0.793014	0.793014	0.790809	0.790809	6.26598e-05	1.9	0.955	0	0.477
406	LG5(K7)	5		0.13	4	0.793012	0.793012	0.790807	0.790807	6.26608e-05	1.9	0.97	0	0.485
407	LG5(K7)	6		0.14	4	0.793002	0.793002	0.790812	0.790812	6.26769e-05	1.9	0.996	0	0.498
408	LG5(K7)	6.123	AAT-cgct165	0.14	4	0.793	0.793	0.790813	0.790813	6.26799e-05	1.9	1	0	0.5
409	LG5(K7)	7.123		0.19	5	0.793288	0.793288	0.790621	0.790621	6.20973e-05	2.8	0.941	0	0.47
410	LG5(K7)	8.123		0.26	5	0.79358	0.79358	0.790459	0.790459	6.14465e-05	3.8	0.91	0	0.455
411	LG5(K7)	9.123		0.33	5	0.793855	0.793855	0.790331	0.790331	6.07953e-05	4.8	0.907	0	0.453
412	LG5(K7)	10.123		0.41	5	0.794101	0.794101	0.790237	0.790237	6.01959e-05	5.8	0.931	0	0.466
413	LG5(K7)	11.123		0.48	4	0.794314	0.794314	0.79017	0.79017	5.96733e-05	6.6	0.984	0	0.492
414	LG5(K7)	11.346	ATA-ccct140	0.5	4	0.794357	0.794357	0.790158	0.790158	5.95679e-05	6.7	1	0	0.5
415	LG5(K7)	12.346		0.33	5	0.793904	0.793904	0.790362	0.790362	6.07768e-05	4.9	0.976	0	0.488
416	LG5(K7)	13.346		0.18	4	0.793268	0.793268	0.790727	0.790727	6.2264e-05	2.5	0.992	0	0.496
417	LG5(K7)	13.56	LmSSR10-10D130	0.15	4	0.793125	0.793125	0.790824	0.790824	6.25521e-05	2.1	1	0	0.5
418	LG5(K7)	14.56		0.13	4	0.79306	0.79306	0.790882	0.790882	6.26892e-05	1.9	0.969	0	0.485
419	LG5(K7)	15.56		0.12	4	0.792992	0.792992	0.790945	0.790945	6.2829e-05	1.6	0.953	0	0.477
420	LG5(K7)	16.56		0.1	4	0.792919	0.792919	0.791014	0.791014	6.29687e-05	1.4	0.952	0	0.476
421	LG5(K7)	17.56		0.09	4	0.792843	0.792843	0.791087	0.791087	6.31054e-05	1.2	0.966	0	0.483
422	LG5(K7)	18.56		0.07	4	0.792763	0.792763	0.791164	0.791164	6.32359e-05	1	0.994	0	0.497
423	LG5(K7)	18.726	TCT-catt-230	0.07	4	0.79275	0.79275	0.791176	0.791176	6.32567e-05	1	1	0	0.5
424	LG5(K7)	19.726		0.03	6	0.792449	0.792449	0.79139	0.79139	6.35952e-05	0.4	0.889	0	0.444
425	LG5(K7)	20.375	TGA-cgga-220	0	4	0.792111	0.792111	0.791733	0.791733	6.38397e-05	0.1	1	0	0.5
426	LG5(K7)	21.375		0.02	5	0.791548	0.791548	0.792383	0.792383	6.37014e-05	0.3	0.909	0	0.454
427	LG5(K7)	22.375		0.11	4	0.790985	0.790985	0.792966	0.792966	6.28952e-05	1.5	0.953	0	0.476
428	LG5(K7)	22.725	TAA-ccat-120	0.15	4	0.790824	0.790824	0.793125	0.793125	6.25521e-05	2.1	1	0	0.5
429	LG5(K7)	23.725		0.07	5	0.791204	0.791204	0.792844	0.792844	6.32095e-05	1	0.955	0	0.478
430	LG5(K7)	24.725		0.02	4	0.791627	0.791627	0.792395	0.792395	6.37328e-05	0.2	0.972	0	0.486
431	LG5(K7)	25.046	TAC-cctc-170	0.01	4	0.79175	0.79175	0.792231	0.792231	6.38199e-05	0.1	0.99	0	0.495
432	LG5(K7)	26.002	GAA-cgtg-150	0	3	0.791842	0.791842	0.792071	0.792071	6.38623e-05	0	1	0	0.5
433	LG5(K7)	26.002	CaiSSRB03C04-180	0	3	0.791842	0.791842	0.792071	0.792071	6.38623e-05	0	1	0	0.5
434	LG5(K7)	26.002	GTA-cggt-220	0	3	0.791842	0.791842	0.792071	0.792071	6.38623e-05	0	1	0	0.5
435	LG5(K7)	26.002	LmSSR16-4F-230	0	3	0.791842	0.791842	0.792071	0.792071	6.38623e-05	0	1	0	0.5
436	LG5(K7)	26.002	CaiSSRB03C04-175	0	3	0.791842	0.791842	0.792071	0.792071	6.38623e-05	0	1	0	0.5
437	LG5(K7)	27.002		0.07	5	0.791257	0.791257	0.792968	0.792968	6.3173e-05	1.1	0.992	0	0.496
438	LG5(K7)	27.284	ATC-caac-100	0.11	4	0.79115	0.79115	0.793154	0.793154	6.29164e-05	1.5	1	0	0.5
439	LG5(K7)	28.284		0.11	4	0.79115	0.79115	0.793154	0.793154	6.29164e-05	1.5	0.994	0	0.497
440	LG5(K7)	28.482	LmSSRS143D2*	0.11	4	0.79115	0.79115	0.793154	0.793154	6.29164e-05	1.5	1	0	0.5
441	LG5(K7)	28.482	LmSSR2-12F-450	0.11	4	0.79115	0.79115	0.793154	0.793154	6.29164e-05	1.5	1	0	0.5
442	LG5(K7)	28.482	TAG-ctgg-180	0.11	4	0.79115	0.79115	0.793154	0.793154	6.29164e-05	1.5	1	0	0.5
443	LG5(K7)	29.088	AAT-ccgt350	0.11	4	0.79115	0.79115	0.793154	0.793154	6.29164e-05	1.5	1	0	0.5
444	LG5(K7)	30.077	AAC-ccgt450	0.01	4	0.791667	0.791667	0.792417	0.792417	6.37449e-05	0.2	1	0	0.5
445	LG5(K7)	31.077		0.08	5	0.791246	0.791246	0.792998	0.792998	6.31409e-05	1.1	0.942	0	0.471
446	LG5(K7)	32.077		0.18	4	0.79087	0.79087	0.793402	0.793402	6.23118e-05	2.4	0.99	0	0.495
447	LG5(K7)	32.166	TGA-cgga-260	0.19	4	0.790842	0.790842	0.793429	0.793429	6.22411e-05	2.6	1	0	0.5
448	LG5(K7)	32.742	TCT-cgtt-180	0.11	4	0.79115	0.79115	0.793154	0.793154	6.29164e-05	1.5	1	0	0.5
449	LG5(K7)	33.742		0.22	5	0.790802	0.790802	0.793825	0.793825	6.17309e-05	3.4	0.977	0	0.488
450	LG5(K7)	34.742		0.34	5	0.790611	0.790611	0.794243	0.794243	6.0814e-05	4.8	0.988	0	0.494
451	LG5(K7)	35.084	LmSSR2-12F-600	0.38	4	0.790571	0.790571	0.794333	0.794333	6.06003e-05	5.1	1	0	0.5
452	LG5(K7)	35.084	LmSSR7-10D	0.38	4	0.790571	0.790571	0.794333	0.794333	6.06003e-05	5.1	1	0	0.5
453	LG5(K7)	36.084		0.33	5	0.790538	0.790538	0.794126	0.794126	6.08112e-05	4.8	0.895	0	0.448
454	LG5(K7)	37.084		0.27	6	0.790566	0.790566	0.793845	0.793845	6.12581e-05	4.1	0.859	0	0.43
455	LG5(K7)	38.084		0.2	5	0.790677	0.790677	0.793483	0.793483	6.19267e-05	3.1	0.891	0	0.446
456	LG5(K7)	39.084		0.14	4	0.79087	0.79087	0.793084	0.793084	6.26508e-05	1.9	0.992	0	0.496
457	LG5(K7)	39.14	GTG-cgct-240	0.13	4	0.790882	0.790882	0.793063	0.793063	6.26879e-05	1.9	1	0	0.5
458	LG5(K7)	40.14		0.16	5	0.790762	0.790762	0.793225	0.793225	6.23613e-05	2.4	0.893	0	0.447
459	LG5(K7)	41.14		0.18	6	0.790686	0.790686	0.793354	0.793354	6.21012e-05	2.8	0.842	0	0.421
460	LG5(K7)	42.14		0.19	5	0.790666	0.790666	0.793435	0.793435	6.19702e-05	3	0.847	0	0.423
461	LG5(K7)	43.14		0.2	5	0.790705	0.790705	0.793462	0.793462	6.1996e-05	2.9	0.907	0	0.454
462	LG5(K7)	43.883	TTC-ccgc	0.2	4	0.790768	0.790768	0.793446	0.793446	6.21098e-05	2.8	0.989	0	0.494
463	LG5(K7)	44.883		0.22	7	0.790567	0.790567	0.793801	0.793801	6.13205e-05	4	0.903	0	0.451
464	LG5(K7)	45.883		0.2	8	0.79065	0.79065	0.793783	0.793783	6.14983e-05	3.7	0.891	0	0.445
465	LG5(K7)	46.883		0.13	6	0.790994	0.790994	0.793365	0.793365	6.25271e-05	2.1	0.954	0	0.477
466	LG5(K7)	47.286	TCC-cgtc-490	0.11	4	0.79115	0.79115	0.793154	0.793154	6.29164e-05	1.5	1	0	0.5
467	LG5(K7)	48.286		0.1	4	0.79118	0.79118	0.793117	0.793117	6.29805e-05	1.4	0.958	0	0.479
468	LG5(K7)	49.286		0.09	4	0.791211	0.791211	0.793076	0.793076	6.3048e-05	1.3	0.924	0	0.462
469	LG5(K7)	50.286		0.08	4	0.791246	0.791246	0.793031	0.793031	6.31184e-05	1.2	0.897	0	0.448
470	LG5(K7)	51.286		0.07	5	0.791283	0.791283	0.792982	0.792982	6.31907e-05	1.1	0.876	0	0.438
471	LG5(K7)	52.286		0.06	5	0.791322	0.791322	0.792929	0.792929	6.32642e-05	1	0.863	0	0.431
472	LG5(K7)	53.286		0.06	5	0.791363	0.791363	0.792872	0.792872	6.33378e-05	0.8	0.856	0	0.428
473	LG5(K7)	54.286		0.05	5	0.791406	0.791406	0.792811	0.792811	6.34101e-05	0.7	0.857	0	0.428
474	LG5(K7)	55.286		0.04	5	0.79145	0.79145	0.792747	0.792747	6.34799e-05	0.6	0.864	0	0.432
475	LG5(K7)	56.286		0.03	4	0.791496	0.791496	0.792681	0.792681	6.35461e-05	0.5	0.878	0	0.439
476	LG5(K7)	57.286		0.03	4	0.791541	0.791541	0.792612	0.792612	6.36074e-05	0.4	0.9	0	0.45
477	LG5(K7)	58.286		0.02	4	0.791587	0.791587	0.792542	0.792542	6.36629e-05	0.3	0.928	0	0.464
478	LG5(K7)	59.286		0.02	4	0.791632	0.791632	0.792471	0.792471	6.37119e-05	0.3	0.963	0	0.482
479	LG5(K7)	60.057	GAC-cagt-230	0.01	4	0.791667	0.791667	0.792417	0.792417	6.37449e-05	0.2	0.995	0	0.498
480	LG6(K7)	0	ATC-ctac-250	0.48	4	0.789955	0.789955	0.794016	0.794016	5.97553e-05	6.4	0.994	0	0.497
481	LG6(K7)	1		0.49	6	0.789853	0.789853	0.794142	0.794142	5.92813e-05	7.2	0.955	0	0.478
482	LG6(K7)	2		0.49	7	0.789761	0.789761	0.794257	0.794257	5.88259e-05	7.9	0.921	0	0.46
483	LG6(K7)	3		0.5	8	0.789684	0.789684	0.794356	0.794356	5.84251e-05	8.5	0.891	0	0.446
484	LG6(K7)	4		0.49	8	0.789628	0.789628	0.794432	0.794432	5.81139e-05	9	0.866	0	0.433
485	LG6(K7)	5		0.49	9	0.789596	0.789596	0.794481	0.794481	5.79172e-05	9.3	0.845	0	0.423
486	LG6(K7)	6		0.47	9	0.789589	0.789589	0.794502	0.794502	5.78519e-05	9.4	0.829	0	0.414
487	LG6(K7)	7		0.45	9	0.789609	0.789609	0.794494	0.794494	5.79221e-05	9.3	0.817	0	0.408
488	LG6(K7)	8		0.43	10	0.789655	0.789655	0.794457	0.794457	5.81228e-05	9	0.809	0	0.404
489	LG6(K7)	9		0.4	10	0.789727	0.789727	0.794393	0.794393	5.84456e-05	8.5	0.805	0	0.403
490	LG6(K7)	10		0.37	10	0.789822	0.789822	0.794302	0.794302	5.88721e-05	7.8	0.806	0	0.403
491	LG6(K7)	11		0.34	9	0.789939	0.789939	0.794187	0.794187	5.9379e-05	7	0.811	0	0.406
492	LG6(K7)	12		0.3	9	0.790074	0.790074	0.794051	0.794051	5.99343e-05	6.2	0.821	0	0.41
493	LG6(K7)	13		0.27	8	0.790221	0.790221	0.7939	0.7939	6.05066e-05	5.3	0.835	0	0.417
494	LG6(K7)	14		0.23	8	0.790376	0.790376	0.793738	0.793738	6.10621e-05	4.4	0.853	0	0.427
495	LG6(K7)	15		0.2	7	0.790532	0.790532	0.793573	0.793573	6.15758e-05	3.6	0.876	0	0.438
496	LG6(K7)	16		0.17	6	0.790684	0.790684	0.793409	0.793409	6.20302e-05	2.9	0.903	0	0.451
497	LG6(K7)	17		0.14	6	0.790829	0.790829	0.793252	0.793252	6.24175e-05	2.3	0.934	0	0.467
498	LG6(K7)	18		0.12	5	0.790963	0.790963	0.793103	0.793103	6.27384e-05	1.8	0.97	0	0.485
499	LG6(K7)	18.747	GTT-cgag-410	0.11	4	0.791056	0.791056	0.793	0.793	6.29377e-05	1.5	1	0	0.5
500	LG6(K7)	19.747		0.05	5	0.791353	0.791353	0.792744	0.792744	6.34034e-05	0.7	0.9	0	0.45
501	LG6(K7)	20.747		0.01	4	0.791715	0.791715	0.792298	0.792298	6.37948e-05	0.1	0.926	0	0.463
502	LG6(K7)	21.336	ATC-ccat100	0	3	0.791905	0.791905	0.792	0.792	6.3873e-05	0	1	0	0.5
503	LG6(K7)	22.336		0	4	0.792108	0.792108	0.791685	0.791685	6.38322e-05	0.1	0.909	0	0.455
504	LG6(K7)	23.043	LmSSR2-5G-280	0.02	4	0.792263	0.792263	0.7915	0.7915	6.37329e-05	0.2	1	0	0.5
505	LG6(K7)	24.043		0	4	0.792014	0.792014	0.791838	0.791838	6.38676e-05	0	0.932	0	0.466
506	LG6(K7)	25.043		0.01	4	0.791743	0.791743	0.792206	0.792206	6.38229e-05	0.1	0.956	0	0.478
507	LG6(K7)	25.519	LmSSR1-9G-170	0.01	4	0.791632	0.791632	0.792357	0.792357	6.37465e-05	0.2	1	0	0.5
508	LG6(K7)	26.197	ATA-cgaa140	0.01	4	0.791722	0.791722	0.7922	0.7922	6.38185e-05	0.1	1	0	0.5
509	LG6(K7)	26.197	GAC-ctac-450	0.01	4	0.791722	0.791722	0.7922	0.7922	6.38185e-05	0.1	1	0	0.5
510	LG6(K7)	27.036	TAT-cctt-140	0.02	4	0.792263	0.792263	0.7915	0.7915	6.37329e-05	0.2	1	0	0.5
511	LG6(K7)	27.104	LmSSR7-6H-160*	0.02	4	0.792263	0.792263	0.7915	0.7915	6.37329e-05	0.2	1	0	0.5
512	LG6(K7)	27.104	GTT-ctcg-170	0.02	4	0.792263	0.792263	0.7915	0.7915	6.37329e-05	0.2	1	0	0.5
513	LG6(K7)	27.104	ATT-ccat110	0.02	4	0.792263	0.792263	0.7915	0.7915	6.37329e-05	0.2	1	0	0.5
514	LG6(K7)	27.195	LmSSR11-4H-200*	0.02	4	0.792263	0.792263	0.7915	0.7915	6.37329e-05	0.2	1	0	0.5
515	LG6(K7)	28.195		0.02	4	0.792293	0.792293	0.791485	0.791485	6.37146e-05	0.3	0.965	0	0.483
516	LG6(K7)	29.195		0.02	4	0.792323	0.792323	0.791471	0.791471	6.36954e-05	0.3	0.983	0	0.491
517	LG6(K7)	29.524	CaiSSRB04O03-290	0.02	4	0.792333	0.792333	0.791467	0.791467	6.36889e-05	0.3	1	0	0.5
518	LG6(K7)	29.524	ATG-caag-170	0.02	4	0.792333	0.792333	0.791467	0.791467	6.36889e-05	0.3	1	0	0.5
519	LG6(K7)	30.524		0.02	4	0.792333	0.792333	0.791467	0.791467	6.36889e-05	0.3	0.998	0	0.499
520	LG6(K7)	30.575	AAC-cacc-550	0.02	4	0.792333	0.792333	0.791467	0.791467	6.36889e-05	0.3	1	0	0.5
521	LG6(K7)	31.575		0.02	4	0.792333	0.792333	0.791467	0.791467	6.36888e-05	0.3	0.955	0	0.478
522	LG6(K7)	32.218	CaiSSRB04O03-300	0.02	4	0.792333	0.792333	0.791467	0.791467	6.36889e-05	0.3	1	0	0.5
523	LG6(K7)	33.218		0.1	5	0.792894	0.792894	0.790957	0.790957	6.29365e-05	1.5	0.92	0	0.46
524	LG6(K7)	33.94	ATG-caag-165	0.18	4	0.79325	0.79325	0.790706	0.790706	6.22585e-05	2.5	1	0	0.5
525	LG6(K7)	34.94		0	4	0.791971	0.791971	0.7919	0.7919	6.38738e-05	0	0.932	0	0.466
526	LG6(K7)	35.252	CaiSSRB08C21-150	0.01	4	0.791632	0.791632	0.792357	0.792357	6.37465e-05	0.2	1	0	0.5
527	LG6(K7)	36.252		0.01	4	0.791631	0.791631	0.792357	0.792357	6.37465e-05	0.2	0.954	0	0.477
528	LG6(K7)	37.252		0.01	4	0.791632	0.791632	0.792357	0.792357	6.37465e-05	0.2	0.978	0	0.489
529	LG6(K7)	37.556	TCG-cgtg-210	0.01	4	0.791632	0.791632	0.792357	0.792357	6.37465e-05	0.2	1	0	0.5
530	LG6(K7)	38.556		0.01	4	0.791631	0.791631	0.792357	0.792357	6.37464e-05	0.2	0.946	0	0.473
531	LG6(K7)	39.556		0.01	4	0.791631	0.791631	0.792357	0.792357	6.37464e-05	0.2	0.929	0	0.464
532	LG6(K7)	40.556		0.01	4	0.791631	0.791631	0.792357	0.792357	6.37464e-05	0.2	0.947	0	0.473
533	LG6(K7)	41.545	ATC-ctac-600	0.01	4	0.791632	0.791632	0.792357	0.792357	6.37466e-05	0.2	1	0	0.5
534	LG6(K7)	42.545		0.01	4	0.791632	0.791632	0.792357	0.792357	6.37465e-05	0.2	0.994	0	0.497
535	LG6(K7)	42.734	ATA-ctaa-220	0.01	4	0.791632	0.791632	0.792357	0.792357	6.37465e-05	0.2	1	0	0.5
536	LG6(K7)	43.734		0.02	4	0.791604	0.791604	0.792401	0.792401	6.37203e-05	0.2	0.961	0	0.48
537	LG6(K7)	44.734		0.02	4	0.791576	0.791576	0.792445	0.792445	6.36915e-05	0.3	0.931	0	0.465
538	LG6(K7)	45.734		0.02	4	0.791549	0.791549	0.79249	0.79249	6.36603e-05	0.3	0.911	0	0.456
539	LG6(K7)	46.734		0.03	4	0.791523	0.791523	0.792536	0.792536	6.36268e-05	0.4	0.901	0	0.45
540	LG6(K7)	47.734		0.03	4	0.791497	0.791497	0.792582	0.792582	6.35912e-05	0.4	0.901	0	0.45
541	LG6(K7)	48.734		0.04	4	0.791472	0.791472	0.792627	0.792627	6.35536e-05	0.5	0.91	0	0.455
542	LG6(K7)	49.734		0.04	4	0.791448	0.791448	0.792673	0.792673	6.35143e-05	0.6	0.929	0	0.464
543	LG6(K7)	50.734		0.04	4	0.791424	0.791424	0.792719	0.792719	6.34734e-05	0.6	0.957	0	0.479
544	LG6(K7)	51.734		0.05	4	0.791402	0.791402	0.792765	0.792765	6.34314e-05	0.7	0.996	0	0.498
545	LG6(K7)	51.825	TAT-ccaa-180	0.05	4	0.7914	0.7914	0.792769	0.792769	6.34275e-05	0.7	1	0	0.5
546	LG6(K7)	52.825		0.03	5	0.791466	0.791466	0.792652	0.792652	6.35374e-05	0.5	0.963	0	0.481
547	LG6(K7)	53.825		0.02	5	0.791561	0.791561	0.792499	0.792499	6.36634e-05	0.3	0.936	0	0.468
548	LG6(K7)	54.825		0.01	6	0.791685	0.791685	0.79231	0.79231	6.37809e-05	0.1	0.919	0	0.459
549	LG6(K7)	55.825		0	5	0.791831	0.791831	0.792095	0.792095	6.38582e-05	0	0.912	0	0.456
550	LG6(K7)	56.825		0	5	0.791984	0.791984	0.791876	0.791876	6.38723e-05	0	0.916	0	0.458
551	LG6(K7)	57.825		0	5	0.792128	0.792128	0.791674	0.791674	6.38252e-05	0.1	0.93	0	0.465
552	LG6(K7)	58.825		0.01	5	0.79225	0.79225	0.791508	0.791508	6.37413e-05	0.2	0.955	0	0.477
553	LG6(K7)	59.825		0.02	4	0.792347	0.792347	0.791383	0.791383	6.36485e-05	0.4	0.989	0	0.495
554	LG6(K7)	60.089	CaiSSRA03M16-170	0.03	4	0.792368	0.792368	0.791357	0.791357	6.36253e-05	0.4	1	0	0.5
555	LG6(K7)	61.089		0.02	5	0.792335	0.792335	0.791401	0.791401	6.36619e-05	0.3	0.945	0	0.472
556	LG6(K7)	62.089		0.01	6	0.792279	0.792279	0.791476	0.791476	6.37179e-05	0.2	0.899	0	0.449
557	LG6(K7)	63.089		0.01	7	0.792192	0.792192	0.791595	0.791595	6.37878e-05	0.1	0.862	0	0.431
558	LG6(K7)	64.089		0	7	0.792069	0.792069	0.791763	0.791763	6.38522e-05	0	0.833	0	0.416
559	LG6(K7)	65.089		0	6	0.79191	0.79191	0.791979	0.791979	6.38739e-05	0	0.813	0	0.407
560	LG6(K7)	66.089		0	9	0.791723	0.791723	0.79223	0.79223	6.38121e-05	0.1	0.802	0	0.401
561	LG6(K7)	67.089		0.01	10	0.791532	0.791532	0.792483	0.792483	6.3654e-05	0.3	0.799	0	0.4
562	LG6(K7)	68.089		0.02	10	0.791366	0.791366	0.792701	0.792701	6.34381e-05	0.7	0.805	0	0.403
563	LG6(K7)	69.089		0.04	10	0.791241	0.791241	0.792865	0.792865	6.32293e-05	1	0.82	0	0.41
564	LG6(K7)	70.089		0.05	9	0.791164	0.791164	0.792968	0.792968	6.30774e-05	1.2	0.844	0	0.422
565	LG6(K7)	71.089		0.07	8	0.791128	0.791128	0.79302	0.79302	6.29981e-05	1.4	0.876	0	0.438
566	LG6(K7)	72.089		0.08	6	0.791124	0.791124	0.793033	0.793033	6.29834e-05	1.4	0.917	0	0.458
567	LG6(K7)	73.089		0.09	5	0.791141	0.791141	0.793018	0.793018	6.30142e-05	1.3	0.966	0	0.483
568	LG6(K7)	73.68	CaiSSRb101	0.09	4	0.791158	0.791158	0.793	0.793	6.30463e-05	1.3	1	0	0.5
569	LG6(K7)	74.68		0.11	5	0.791052	0.791052	0.793161	0.793161	6.27906e-05	1.7	0.963	0	0.482
570	LG6(K7)	75.68		0.13	6	0.790953	0.790953	0.793315	0.793315	6.25186e-05	2.1	0.936	0	0.468
571	LG6(K7)	76.68		0.16	6	0.790871	0.790871	0.793449	0.793449	6.22622e-05	2.5	0.919	0	0.46
572	LG6(K7)	77.68		0.18	6	0.790811	0.790811	0.793555	0.793555	6.20512e-05	2.9	0.912	0	0.456
573	LG6(K7)	78.68		0.19	6	0.790774	0.790774	0.793631	0.793631	6.19037e-05	3.1	0.915	0	0.458
574	LG6(K7)	79.68		0.21	6	0.79076	0.79076	0.793677	0.793677	6.18247e-05	3.2	0.928	0	0.464
575	LG6(K7)	80.68		0.22	5	0.790765	0.790765	0.793698	0.793698	6.1809e-05	3.2	0.95	0	0.475
576	LG6(K7)	81.68		0.23	4	0.790786	0.790786	0.793698	0.793698	6.18468e-05	3.2	0.982	0	0.491
577	LG6(K7)	82.127	ATA-cctt170	0.23	4	0.7908	0.7908	0.793692	0.793692	6.18779e-05	3.1	1	0	0.5
578	LG7(K7)	0	TAA-caga-320	0.14	4	0.793778	0.793778	0.79125	0.79125	6.26077e-05	2	1	0	0.5
579	LG7(K7)	1		0.28	9	0.794965	0.794965	0.790703	0.790703	6.01356e-05	5.9	0.871	0	0.435
580	LG7(K7)	2		0.38	10	0.795452	0.795452	0.790373	0.790373	5.8374e-05	8.6	0.837	0	0.419
581	LG7(K7)	3		0.36	8	0.794815	0.794815	0.790479	0.790479	5.9677e-05	6.6	0.9	0	0.45
582	LG7(K7)	3.696	CaiSSRB06D01	0.3	4	0.794083	0.794083	0.790714	0.790714	6.12486e-05	4.1	1	0	0.5
583	LG7(K7)	4.696		0.3	6	0.794233	0.794233	0.790616	0.790616	6.08397e-05	4.8	0.932	0	0.466
584	LG7(K7)	5.696		0.28	7	0.794177	0.794177	0.790604	0.790604	6.08873e-05	4.7	0.897	0	0.449
585	LG7(K7)	6.696		0.24	6	0.793949	0.793949	0.79067	0.79067	6.13231e-05	4	0.897	0	0.449
586	LG7(K7)	7.696		0.2	6	0.793626	0.793626	0.790792	0.790792	6.19411e-05	3	0.932	0	0.466
587	LG7(K7)	8.691	GAC-cccc-190	0.15	4	0.793286	0.793286	0.790947	0.790947	6.25395e-05	2.1	1	0	0.5
588	LG7(K7)	9.562	TAT-ctat-160	0.19	4	0.793538	0.793538	0.7909	0.7909	6.22131e-05	2.6	1	0	0.5
589	LG7(K7)	10.34	GAT-cggt-190	0.04	4	0.7926	0.7926	0.791389	0.791389	6.35114e-05	0.6	1	0	0.5
590	LG7(K7)	11.003	AAA-caca-130	0.56	4	0.794833	0.794833	0.790286	0.790286	5.90895e-05	7.5	1	0	0.5
591	LG7(K7)	11.082	TTT-ccca-230	0.56	4	0.794833	0.794833	0.790286	0.790286	5.90895e-05	7.5	1	0	0.5
592	LG7(K7)	11.323	TTG-cgta-110	0.56	4	0.794833	0.794833	0.790286	0.790286	5.90895e-05	7.5	1	0	0.5
593	LG7(K7)	11.793	LmSSR9-9G	0.19	4	0.793538	0.793538	0.7909	0.7909	6.22131e-05	2.6	1	0	0.5
594	LG7(K7)	12.359	GTG-ccag-270	0.56	4	0.794833	0.794833	0.790286	0.790286	5.90895e-05	7.5	1	0	0.5
595	LG7(K7)	12.359	CaiSSRB01P02	0.56	4	0.794833	0.794833	0.790286	0.790286	5.90895e-05	7.5	1	0	0.5
596	LG7(K7)	13.258	TTT-cgtc-300	0.21	4	0.793615	0.793615	0.79085	0.79085	6.20493e-05	2.9	1	0	0.5
597	LG7(K7)	13.258	LmSSR17-8D-280	0.21	4	0.793615	0.793615	0.79085	0.79085	6.20493e-05	2.9	1	0	0.5
598	LG7(K7)	13.721	LmSSRFL33A9*	0.21	4	0.793615	0.793615	0.79085	0.79085	6.20493e-05	2.9	1	0	0.5
599	LG7(K7)	13.727	LmSSR10-12D-270	0.21	4	0.793615	0.793615	0.79085	0.79085	6.20493e-05	2.9	1	0	0.5
600	LG7(K7)	13.874	TTA-ccct	0.21	4	0.793615	0.793615	0.79085	0.79085	6.20493e-05	2.9	1	0	0.5
601	LG7(K7)	14.133	LmSSR10-12D-280	0.56	4	0.794833	0.794833	0.790286	0.790286	5.90895e-05	7.5	1	0	0.5
602	LG7(K7)	14.991	LmSSR11-2E-450	0.44	4	0.794214	0.794214	0.790263	0.790263	6.00619e-05	6	1	0	0.5
603	LG7(K7)	15.355	CaiSSRA01A09-220	0.13	4	0.793133	0.793133	0.790944	0.790944	6.26872e-05	1.9	1	0	0.5
604	LG7(K7)	15.758	TTC-cccg-190	0.03	4	0.7925	0.7925	0.791526	0.791526	6.36435e-05	0.4	1	0	0.5
605	LG7(K7)	16.758		0.12	6	0.79324	0.79324	0.790919	0.790919	6.25474e-05	2.1	0.937	0	0.468
606	LG7(K7)	17.284	ATC-cgct380	0.15	4	0.7932	0.7932	0.790889	0.790889	6.25508e-05	2.1	1	0	0.5
607	LG7(K7)	18.284		0.34	5	0.793986	0.793986	0.790391	0.790391	6.07071e-05	5	0.967	0	0.484
608	LG7(K7)	18.878	TAC-cctc-280	0.44	4	0.794214	0.794214	0.790263	0.790263	6.00619e-05	6	1	0	0.5
609	LG7(K7)	19.878		0.44	4	0.794214	0.794214	0.790263	0.790263	6.00615e-05	6	0.994	0	0.497
610	LG7(K7)	20.069	CaiSSRB01J02-310	0.44	4	0.794214	0.794214	0.790263	0.790263	6.00619e-05	6	1	0	0.5
611	LG7(K7)	21.069		0.4	5	0.794198	0.794198	0.790325	0.790325	6.0228e-05	5.7	0.87	0	0.435
612	LG7(K7)	22.069		0.35	5	0.794089	0.794089	0.790472	0.790472	6.07193e-05	4.9	0.89	0	0.445
613	LG7(K7)	22.799	LmSSRT132E-110*	0.29	4	0.793923	0.793923	0.79065	0.79065	6.13174e-05	4	1	0	0.5
614	LG7(K7)	23.799		0.33	5	0.793982	0.793982	0.790444	0.790444	6.08207e-05	4.8	0.839	0	0.42
615	LG7(K7)	24.799		0.33	5	0.793857	0.793857	0.790386	0.790386	6.08977e-05	4.7	0.928	0	0.464
616	LG7(K7)	25.088	TTG-cccc	0.33	4	0.7938	0.7938	0.790389	0.790389	6.09902e-05	4.5	1	0	0.5
617	LG7(K7)	26.088		0.6	7	0.794793	0.794793	0.789729	0.789729	5.75678e-05	9.9	0.952	0	0.476
618	LG7(K7)	27.088		0.85	7	0.795258	0.795258	0.789389	0.789389	5.54111e-05	13.3	0.942	0	0.471
619	LG7(K7)	28.088		1.01	6	0.795286	0.795286	0.789253	0.789253	5.48856e-05	14.1	0.969	0	0.485
620	LG7(K7)	28.628	LmSSRS363H7*	1.07	4	0.7952	0.7952	0.789222	0.789222	5.50155e-05	13.9	1	0	0.5
621	LG7(K7)	29.628		1.06	6	0.795394	0.795394	0.789142	0.789142	5.42125e-05	15.1	0.919	0	0.459
622	LG7(K7)	30.628		1.02	7	0.795551	0.795551	0.789103	0.789103	5.36298e-05	16	0.857	0	0.428
623	LG7(K7)	31.628		0.96	8	0.795656	0.795656	0.789111	0.789111	5.33624e-05	16.5	0.814	0	0.407
624	LG7(K7)	32.628		0.87	9	0.795687	0.795687	0.789175	0.789175	5.35164e-05	16.2	0.789	0	0.395
625	LG7(K7)	33.628		0.75	10	0.795609	0.795609	0.789313	0.789313	5.42381e-05	15.1	0.784	0	0.392
626	LG7(K7)	34.628		0.61	10	0.795364	0.795364	0.789557	0.789557	5.57172e-05	12.8	0.797	0	0.399
627	LG7(K7)	35.628		0.46	10	0.794891	0.794891	0.789931	0.789931	5.79463e-05	9.3	0.829	0	0.415
628	LG7(K7)	36.628		0.31	8	0.794267	0.794267	0.790382	0.790382	6.02499e-05	5.7	0.88	0	0.44
629	LG7(K7)	37.628		0.2	6	0.793676	0.793676	0.790797	0.790797	6.18909e-05	3.1	0.95	0	0.475
630	LG7(K7)	38.211	CaiSSRB08L24	0.15	4	0.793385	0.793385	0.791	0.791	6.25175e-05	2.1	1	0	0.5
631	LG7(K7)	39.211		0.35	11	0.794631	0.794631	0.790062	0.790062	5.88215e-05	7.9	0.838	0	0.419
632	LG7(K7)	40.211		0.73	18	0.796262	0.796262	0.788691	0.788691	4.98327e-05	22	0.74	0	0.37
633	LG7(K7)	41.211		1.02	14	0.796516	0.796516	0.788283	0.788283	4.71425e-05	26.2	0.705	0	0.353
634	LG7(K7)	42.211		1.1	12	0.796218	0.796218	0.788335	0.788335	4.84542e-05	24.1	0.734	0	0.367
635	LG7(K7)	43.211		1.03	9	0.795575	0.795575	0.788709	0.788709	5.21307e-05	18.4	0.826	0	0.413
636	LG7(K7)	44.211		0.9	5	0.794811	0.794811	0.789249	0.789249	5.61502e-05	12.1	0.981	0	0.491
637	LG7(K7)	44.296	TAC-cagc-110	0.89	4	0.79475	0.79475	0.789294	0.789294	5.64403e-05	11.6	0.997	0	0.499
638	LG1(N4)	0	LmSSR16-6G-250	0.54	4	0.793789	0.789429	0.793789	0.789429	5.92299e-05	7.3	0	1	0.5
639	LG1(N4)	1		0.52	5	0.793801	0.789472	0.793801	0.789472	5.92823e-05	7.2	0	0.95	0.475
640	LG1(N4)	2		0.51	5	0.79381	0.78952	0.79381	0.78952	5.93493e-05	7.1	0	0.906	0.453
641	LG1(N4)	3		0.49	5	0.793815	0.789571	0.793815	0.789571	5.94315e-05	7	0	0.868	0.434
642	LG1(N4)	4		0.47	5	0.793817	0.789625	0.793817	0.789625	5.95295e-05	6.8	0	0.836	0.418
643	LG1(N4)	5		0.45	6	0.793816	0.789684	0.793816	0.789684	5.96437e-05	6.6	0	0.81	0.405
644	LG1(N4)	6		0.43	6	0.79381	0.789747	0.79381	0.789747	5.97743e-05	6.4	0	0.79	0.395
645	LG1(N4)	7		0.41	6	0.7938	0.789814	0.7938	0.789814	5.99212e-05	6.2	0	0.777	0.388
646	LG1(N4)	8		0.39	6	0.793785	0.789886	0.793785	0.789886	6.00839e-05	5.9	0	0.769	0.384
647	LG1(N4)	9		0.37	6	0.793766	0.789961	0.793766	0.789961	6.02616e-05	5.7	0	0.767	0.383
648	LG1(N4)	10		0.35	6	0.793742	0.790041	0.793742	0.790041	6.04528e-05	5.4	0	0.77	0.385
649	LG1(N4)	11		0.33	6	0.793713	0.790124	0.793713	0.790124	6.06557e-05	5	0	0.78	0.39
650	LG1(N4)	12		0.31	6	0.793678	0.79021	0.793678	0.79021	6.08679e-05	4.7	0	0.796	0.398
651	LG1(N4)	13		0.29	6	0.793639	0.790298	0.793639	0.790298	6.10864e-05	4.4	0	0.818	0.409
652	LG1(N4)	14		0.27	5	0.793595	0.790389	0.793595	0.790389	6.13081e-05	4	0	0.845	0.423
653	LG1(N4)	15		0.25	5	0.793547	0.79048	0.793547	0.79048	6.15295e-05	3.7	0	0.879	0.44
654	LG1(N4)	16		0.23	5	0.793495	0.790571	0.793495	0.790571	6.17474e-05	3.3	0	0.919	0.46
655	LG1(N4)	17		0.21	4	0.793439	0.790662	0.793439	0.790662	6.19586e-05	3	0	0.965	0.483
656	LG1(N4)	17.681	TTA-ccga-500	0.2	4	0.7934	0.790722	0.7934	0.790722	6.20973e-05	2.8	0	1	0.5
657	LG1(N4)	18.681		0.26	5	0.793568	0.790463	0.793568	0.790463	6.14708e-05	3.8	0	0.941	0.47
658	LG1(N4)	19.681		0.32	5	0.793663	0.790257	0.793663	0.790257	6.09746e-05	4.5	0	0.932	0.466
659	LG1(N4)	20.681		0.37	4	0.793702	0.790104	0.793702	0.790104	6.064e-05	5.1	0	0.974	0.487
660	LG1(N4)	21.015	GTA-ccaa-170	0.38	4	0.793706	0.790063	0.793706	0.790063	6.05596e-05	5.2	0	1	0.5
661	LG1(N4)	22.015		0.32	5	0.79359	0.790163	0.79359	0.790163	6.09424e-05	4.6	0	0.946	0.473
662	LG1(N4)	23.015		0.26	5	0.793451	0.790291	0.793451	0.790291	6.13822e-05	3.9	0	0.908	0.454
663	LG1(N4)	24.015		0.2	6	0.793285	0.790451	0.793285	0.790451	6.18723e-05	3.1	0	0.885	0.443
664	LG1(N4)	25.015		0.15	6	0.793089	0.790647	0.793089	0.790647	6.23895e-05	2.3	0	0.878	0.439
665	LG1(N4)	26.015		0.1	6	0.792869	0.790878	0.792869	0.790878	6.28881e-05	1.5	0	0.887	0.443
666	LG1(N4)	27.015		0.06	5	0.792637	0.791129	0.792637	0.791129	6.33104e-05	0.9	0	0.911	0.456
667	LG1(N4)	28.015		0.03	4	0.792409	0.791384	0.792409	0.791384	6.3614e-05	0.4	0	0.951	0.475
668	LG1(N4)	28.913	CaiSSRB01A19-140	0.01	4	0.792222	0.7916	0.792222	0.7916	6.37791e-05	0.2	0	1	0.5
669	LG1(N4)	29.913		0.03	5	0.792457	0.791341	0.792457	0.791341	6.35654e-05	0.5	0	0.944	0.472
670	LG1(N4)	30.913		0.07	5	0.792689	0.791104	0.792689	0.791104	6.32486e-05	1	0	0.929	0.465
671	LG1(N4)	31.913		0.1	5	0.792885	0.790917	0.792885	0.790917	6.29085e-05	1.5	0	0.955	0.477
672	LG1(N4)	32.652	LmSSR16-6G-180	0.14	4	0.793	0.790813	0.793	0.790813	6.26799e-05	1.9	0	1	0.5
673	LG1(N4)	33.652		0.05	5	0.792615	0.791252	0.792615	0.791252	6.3411e-05	0.7	0	0.911	0.455
674	LG1(N4)	34.652		0	4	0.792144	0.791742	0.792144	0.791742	6.38347e-05	0.1	0	0.936	0.468
675	LG1(N4)	35.219	TAA-caga-590	0	3	0.791875	0.792	0.791875	0.792	6.38712e-05	0	0	1	0.5
676	LG1(N4)	36.219		0.01	4	0.791685	0.792175	0.791685	0.792175	6.3815e-05	0.1	0	0.953	0.476
677	LG1(N4)	37.219		0.02	5	0.791469	0.792367	0.791469	0.792367	6.36738e-05	0.3	0	0.921	0.46
678	LG1(N4)	38.219		0.04	6	0.791246	0.792561	0.791246	0.792561	6.34442e-05	0.7	0	0.905	0.452
679	LG1(N4)	39.219		0.07	6	0.791036	0.792735	0.791036	0.792735	6.31563e-05	1.1	0	0.904	0.452
680	LG1(N4)	40.219		0.1	5	0.790856	0.792877	0.790856	0.792877	6.28598e-05	1.6	0	0.919	0.46
681	LG1(N4)	41.219		0.13	5	0.790713	0.792982	0.790713	0.792982	6.25968e-05	2	0	0.95	0.475
682	LG1(N4)	42.219		0.17	4	0.790605	0.793052	0.790605	0.793052	6.239e-05	2.3	0	0.997	0.498
683	LG1(N4)	42.276	TAC-ccag-50	0.17	4	0.7906	0.793056	0.7906	0.793056	6.23801e-05	2.3	0	1	0.5
684	LG1(N4)	43.276		0.11	5	0.790866	0.792854	0.790866	0.792854	6.28938e-05	1.5	0	0.917	0.458
685	LG1(N4)	44.276		0.05	5	0.791177	0.792607	0.791177	0.792607	6.33662e-05	0.8	0	0.883	0.441
686	LG1(N4)	45.276		0.02	4	0.79151	0.792327	0.79151	0.792327	6.37087e-05	0.3	0	0.899	0.449
687	LG1(N4)	46.276		0	4	0.791831	0.792041	0.791831	0.792041	6.38641e-05	0	0	0.964	0.482
688	LG1(N4)	46.638	CaiSSRB06A04-230	0	2	0.791938	0.791941	0.791938	0.791941	6.38751e-05	0	0	1	0.5
689	LG1(N4)	47.638		0	2	0.791937	0.791941	0.791937	0.791941	6.38751e-05	0	0	0.943	0.471
690	LG1(N4)	48.638		0	2	0.791937	0.791941	0.791937	0.791941	6.38751e-05	0	0	0.971	0.486
691	LG1(N4)	48.972	LmSSR16-2F	0	2	0.791938	0.791941	0.791938	0.791941	6.38751e-05	0	0	1	0.5
692	LG1(N4)	49.972		0	2	0.791937	0.791941	0.791937	0.791941	6.38751e-05	0	0	0.965	0.482
693	LG1(N4)	50.972		0	2	0.791937	0.791941	0.791937	0.791941	6.38751e-05	0	0	0.987	0.494
694	LG1(N4)	51.195	CaiSSRB06A04-200	0	2	0.791938	0.791941	0.791938	0.791941	6.38751e-05	0	0	1	0.5
695	LG1(N4)	52.195		0	2	0.791937	0.791941	0.791937	0.791941	6.38751e-05	0	0	0.965	0.482
696	LG1(N4)	53.155	LmSSRpre8*	0	2	0.791938	0.791941	0.791938	0.791941	6.38751e-05	0	0	1	0.5
697	LG1(N4)	53.155	ATC-cgct250	0	2	0.791938	0.791941	0.791938	0.791941	6.38751e-05	0	0	1	0.5
698	LG1(N4)	54.155		0	2	0.791937	0.791941	0.791937	0.791941	6.38751e-05	0	0	0.954	0.477
699	LG1(N4)	54.995	GAT-ctat-190	0	2	0.791938	0.791941	0.791938	0.791941	6.38751e-05	0	0	1	0.5
700	LG1(N4)	55.995		0.01	5	0.79164	0.792222	0.79164	0.792222	6.37904e-05	0.1	0	0.924	0.462
701	LG1(N4)	56.995		0.03	5	0.791354	0.792494	0.791354	0.792494	6.35509e-05	0.5	0	0.934	0.467
702	LG1(N4)	57.757	CaiSSRD09J21-160	0.06	4	0.791188	0.792647	0.791188	0.792647	6.3343e-05	0.8	0	1	0.5
703	LG1(N4)	58.757		0.08	4	0.791085	0.792822	0.791085	0.792822	6.3121e-05	1.2	0	0.924	0.462
704	LG1(N4)	59.757		0.11	4	0.790998	0.793004	0.790998	0.793004	6.28731e-05	1.6	0	0.936	0.468
705	LG1(N4)	60.471	TCT-catt-150	0.13	4	0.790944	0.793133	0.790944	0.793133	6.26872e-05	1.9	0	1	0.5
706	LG1(N4)	61.331	CaiSSRB02M22-310	0.08	4	0.791118	0.792813	0.791118	0.792813	6.31576e-05	1.1	0	1	0.5
707	LG1(N4)	61.331	CaiSSRB02M22-290	0.08	4	0.791118	0.792813	0.791118	0.792813	6.31576e-05	1.1	0	1	0.5
708	LG1(N4)	61.331	CaiSSRD03H10-250	0.08	4	0.791118	0.792813	0.791118	0.792813	6.31576e-05	1.1	0	1	0.5
709	LG1(N4)	62.331		0.01	4	0.791707	0.792218	0.791707	0.792218	6.38103e-05	0.1	0	0.999	0.499
710	LG1(N4)	62.357	GCT-cgct-500	0.01	4	0.791722	0.7922	0.791722	0.7922	6.38186e-05	0.1	0	1	0.5
711	LG1(N4)	63.357		0.09	5	0.791038	0.792877	0.791038	0.792877	6.30306e-05	1.3	0	0.953	0.477
712	LG1(N4)	64.282	AGC-cgat210	0.22	4	0.7905	0.793294	0.7905	0.793294	6.19251e-05	3.1	0	1	0.5
713	LG1(N4)	65.147	ATA-cgaa150	0.22	4	0.7905	0.793294	0.7905	0.793294	6.19251e-05	3.1	0	1	0.5
714	LG1(N4)	66.147		0.16	5	0.790678	0.793203	0.790678	0.793203	6.22809e-05	2.5	0	0.893	0.446
715	LG1(N4)	67.147		0.1	6	0.790942	0.793016	0.790942	0.793016	6.28009e-05	1.7	0	0.852	0.426
716	LG1(N4)	68.147		0.05	6	0.79127	0.792725	0.79127	0.792725	6.33492e-05	0.8	0	0.877	0.439
717	LG1(N4)	69.147		0.01	5	0.791602	0.792371	0.791602	0.792371	6.37294e-05	0.2	0	0.97	0.485
718	LG1(N4)	69.293	GCT-cgct-110	0.01	5	0.791646	0.792319	0.791646	0.792319	6.3764e-05	0.2	0	0.989	0.494
719	LG1(N4)	70.293		0	5	0.79183	0.79207	0.79183	0.79207	6.38607e-05	0	0	0.879	0.439
720	LG1(N4)	71.293		0	5	0.792063	0.791804	0.792063	0.791804	6.38584e-05	0	0	0.817	0.408
721	LG1(N4)	72.293		0.01	6	0.792317	0.791555	0.792317	0.791555	6.37298e-05	0.2	0	0.803	0.401
722	LG1(N4)	73.293		0.03	6	0.792558	0.791357	0.792558	0.791357	6.35149e-05	0.6	0	0.837	0.418
723	LG1(N4)	74.293		0.06	5	0.792759	0.791222	0.792759	0.791222	6.32877e-05	0.9	0	0.918	0.459
724	LG1(N4)	74.964	TTC-cgtc-150	0.08	4	0.792867	0.791167	0.792867	0.791167	6.31586e-05	1.1	0	1	0.5
725	LG1(N4)	75.964		0.09	5	0.792988	0.791102	0.792988	0.791102	6.29976e-05	1.4	0	0.93	0.465
726	LG1(N4)	76.964		0.1	5	0.79309	0.791058	0.79309	0.791058	6.28608e-05	1.6	0	0.887	0.443
727	LG1(N4)	77.964		0.11	6	0.793162	0.791038	0.793162	0.791038	6.27736e-05	1.7	0	0.869	0.434
728	LG1(N4)	78.964		0.11	6	0.793198	0.791046	0.793198	0.791046	6.27499e-05	1.8	0	0.877	0.439
729	LG1(N4)	79.964		0.11	5	0.7932	0.791077	0.7932	0.791077	6.27886e-05	1.7	0	0.912	0.456
730	LG1(N4)	80.964		0.11	4	0.79317	0.791129	0.79317	0.791129	6.28772e-05	1.6	0	0.973	0.486
731	LG1(N4)	81.312	ATA-ccat170	0.11	4	0.793154	0.79115	0.793154	0.79115	6.29164e-05	1.5	0	1	0.5
732	LG2(N4)	0	GAT-cggc	0.19	4	0.793538	0.7909	0.793538	0.7909	6.22131e-05	2.6	0	1	0.5
733	LG2(N4)	1		0.13	5	0.793278	0.791024	0.793278	0.791024	6.26496e-05	1.9	0	0.94	0.47
734	LG2(N4)	2		0.08	5	0.79298	0.791184	0.79298	0.791184	6.30889e-05	1.2	0	0.904	0.452
735	LG2(N4)	3		0.04	5	0.792658	0.791382	0.792658	0.791382	6.34745e-05	0.6	0	0.892	0.446
736	LG2(N4)	4		0.01	5	0.792337	0.791609	0.792337	0.791609	6.37437e-05	0.2	0	0.905	0.453
737	LG2(N4)	5		0	4	0.792044	0.791846	0.792044	0.791846	6.38653e-05	0	0	0.943	0.472
738	LG2(N4)	5.928	LmSSR2-12F-300	0	3	0.791813	0.792059	0.791813	0.792059	6.386e-05	0	0	1	0.5
739	LG2(N4)	6.928		0	3	0.791863	0.792009	0.791863	0.792009	6.38698e-05	0	0	0.967	0.484
740	LG2(N4)	7.928		0	3	0.791917	0.79196	0.791917	0.79196	6.38746e-05	0	0	0.952	0.476
741	LG2(N4)	8.928		0	3	0.791971	0.791912	0.791971	0.791912	6.38742e-05	0	0	0.955	0.478
742	LG2(N4)	9.928		0	3	0.792027	0.791865	0.792027	0.791865	6.38686e-05	0	0	0.975	0.488
743	LG2(N4)	10.623	TAT-cagt-300	0	3	0.792067	0.791833	0.792067	0.791833	6.38616e-05	0	0	1	0.5
744	LG2(N4)	11.623		0	3	0.792067	0.791833	0.792067	0.791833	6.38616e-05	0	0	0.996	0.498
745	LG2(N4)	11.664	GCG-cgcg-210	0	3	0.792067	0.791833	0.792067	0.791833	6.38616e-05	0	0	1	0.5
746	LG2(N4)	12.664		0	3	0.792067	0.791833	0.792067	0.791833	6.38616e-05	0	0	0.967	0.484
747	LG2(N4)	13.664		0	3	0.792067	0.791833	0.792067	0.791833	6.38616e-05	0	0	0.952	0.476
748	LG2(N4)	14.664		0	3	0.792067	0.791833	0.792067	0.791833	6.38616e-05	0	0	0.955	0.478
749	LG2(N4)	15.664		0	3	0.792067	0.791833	0.792067	0.791833	6.38616e-05	0	0	0.976	0.488
750	LG2(N4)	16.322	ATC-cggt80	0	3	0.792067	0.791833	0.792067	0.791833	6.38616e-05	0	0	1	0.5
751	LG2(N4)	17.322		0.01	4	0.792268	0.791653	0.792268	0.791653	6.3781e-05	0.1	0	0.978	0.489
752	LG2(N4)	18.322		0.03	4	0.792452	0.79147	0.792452	0.79147	6.36348e-05	0.4	0	0.982	0.491
753	LG2(N4)	19.016	GAG-cacc-260	0.04	4	0.792563	0.791353	0.792563	0.791353	6.35097e-05	0.6	0	1	0.5
754	LG2(N4)	19.016	GTT-cgag-180	0.04	4	0.792563	0.791353	0.792563	0.791353	6.35097e-05	0.6	0	1	0.5
755	LG2(N4)	20.016		0.04	4	0.792563	0.791353	0.792563	0.791353	6.35096e-05	0.6	0	0.991	0.496
756	LG2(N4)	20.358	ATA-cctt160	0.04	4	0.792563	0.791353	0.792563	0.791353	6.35097e-05	0.6	0	1	0.5
757	LG2(N4)	21.358		0.02	4	0.792376	0.791528	0.792376	0.791528	6.36955e-05	0.3	0	0.967	0.483
758	LG2(N4)	22.358		0.01	4	0.792172	0.79172	0.792172	0.79172	6.38242e-05	0.1	0	0.943	0.472
759	LG2(N4)	23.358		0	3	0.791954	0.791925	0.791954	0.791925	6.38749e-05	0	0	0.929	0.465
760	LG2(N4)	24.358		0	4	0.791731	0.792135	0.791731	0.792135	6.38343e-05	0.1	0	0.924	0.462
761	LG2(N4)	25.358		0.02	5	0.79151	0.792343	0.79151	0.792343	6.37021e-05	0.3	0	0.929	0.465
762	LG2(N4)	26.358		0.04	5	0.7913	0.792539	0.7913	0.792539	6.34919e-05	0.6	0	0.943	0.472
763	LG2(N4)	27.358		0.07	4	0.791108	0.79272	0.791108	0.79272	6.32261e-05	1	0	0.967	0.483
764	LG2(N4)	28.354	AGT-cgat250	0.11	4	0.790938	0.792882	0.790938	0.792882	6.29304e-05	1.5	0	1	0.5
765	LG2(N4)	28.354	LmSSR9-7G-140*	0.11	4	0.790938	0.792882	0.790938	0.792882	6.29304e-05	1.5	0	1	0.5
766	LG2(N4)	29.354		0.13	4	0.790789	0.792929	0.790789	0.792929	6.27365e-05	1.8	0	0.991	0.495
767	LG2(N4)	29.732	LmSSR11-4H120*	0.14	4	0.790733	0.792944	0.790733	0.792944	6.2663e-05	1.9	0	1	0.5
768	LG2(N4)	30.732		0.15	4	0.790646	0.792991	0.790646	0.792991	6.25146e-05	2.1	0	0.971	0.486
769	LG2(N4)	31.732		0.17	4	0.790561	0.793034	0.790561	0.793034	6.23664e-05	2.4	0	0.955	0.477
770	LG2(N4)	32.732		0.18	4	0.79048	0.793073	0.79048	0.793073	6.22212e-05	2.6	0	0.95	0.475
771	LG2(N4)	33.732		0.2	4	0.790404	0.793107	0.790404	0.793107	6.20818e-05	2.8	0	0.958	0.479
772	LG2(N4)	34.732		0.22	4	0.790333	0.793138	0.790333	0.793138	6.195e-05	3	0	0.978	0.489
773	LG2(N4)	35.458	ATA-cgaa260	0.23	4	0.790286	0.793158	0.790286	0.793158	6.18601e-05	3.2	0	1	0.5
774	LG2(N4)	36.458		0.23	4	0.790286	0.793158	0.790286	0.793158	6.18598e-05	3.2	0	0.983	0.492
775	LG2(N4)	36.756	TAG-cagg-310	0.23	4	0.790286	0.793158	0.790286	0.793158	6.18601e-05	3.2	0	1	0.5
776	LG2(N4)	37.756		0.21	5	0.790357	0.793124	0.790357	0.793124	6.20001e-05	2.9	0	0.963	0.482
777	LG2(N4)	38.756		0.18	5	0.790437	0.793084	0.790437	0.793084	6.21555e-05	2.7	0	0.933	0.467
778	LG2(N4)	39.756		0.16	5	0.790526	0.793035	0.790526	0.793035	6.23259e-05	2.4	0	0.91	0.455
779	LG2(N4)	40.756		0.14	5	0.790625	0.792978	0.790625	0.792978	6.25097e-05	2.1	0	0.895	0.447
780	LG2(N4)	41.756		0.12	5	0.790734	0.792912	0.790734	0.792912	6.27037e-05	1.8	0	0.886	0.443
781	LG2(N4)	42.756		0.1	6	0.790853	0.792835	0.790853	0.792835	6.29023e-05	1.5	0	0.884	0.442
782	LG2(N4)	43.756		0.08	5	0.79098	0.792749	0.79098	0.792749	6.30984e-05	1.2	0	0.888	0.444
783	LG2(N4)	44.756		0.06	5	0.791111	0.792655	0.791111	0.792655	6.32826e-05	0.9	0	0.9	0.45
784	LG2(N4)	45.756		0.04	5	0.791244	0.792555	0.791244	0.792555	6.34466e-05	0.7	0	0.919	0.46
785	LG2(N4)	46.756		0.03	5	0.791373	0.792453	0.791373	0.792453	6.35839e-05	0.5	0	0.945	0.472
786	LG2(N4)	47.756		0.02	4	0.791495	0.792352	0.791495	0.792352	6.36918e-05	0.3	0	0.978	0.489
787	LG2(N4)	48.341	ATA-cggt120	0.02	4	0.791563	0.792294	0.791563	0.792294	6.37414e-05	0.2	0	1	0.5
788	LG2(N4)	49.341		0.02	4	0.791539	0.792321	0.791539	0.792321	6.37223e-05	0.2	0	0.963	0.481
789	LG2(N4)	50.341		0.02	4	0.791516	0.792349	0.791516	0.792349	6.37017e-05	0.3	0	0.93	0.465
790	LG2(N4)	51.341		0.02	5	0.791493	0.792377	0.791493	0.792377	6.36798e-05	0.3	0	0.902	0.451
791	LG2(N4)	52.341		0.02	5	0.79147	0.792404	0.79147	0.792404	6.36569e-05	0.3	0	0.877	0.439
792	LG2(N4)	53.341		0.02	5	0.791449	0.792432	0.791449	0.792432	6.36333e-05	0.4	0	0.858	0.429
793	LG2(N4)	54.341		0.03	5	0.791428	0.792459	0.791428	0.792459	6.36092e-05	0.4	0	0.842	0.421
794	LG2(N4)	55.341		0.03	5	0.791409	0.792486	0.791409	0.792486	6.35852e-05	0.5	0	0.831	0.415
795	LG2(N4)	56.341		0.03	5	0.791391	0.792511	0.791391	0.792511	6.35617e-05	0.5	0	0.824	0.412
796	LG2(N4)	57.341		0.03	5	0.791376	0.792535	0.791376	0.792535	6.35391e-05	0.5	0	0.821	0.41
797	LG2(N4)	58.341		0.03	5	0.791362	0.792558	0.791362	0.792558	6.35178e-05	0.6	0	0.822	0.411
798	LG2(N4)	59.341		0.04	5	0.79135	0.792579	0.79135	0.792579	6.34984e-05	0.6	0	0.828	0.414
799	LG2(N4)	60.341		0.04	5	0.791341	0.792598	0.791341	0.792598	6.3481e-05	0.6	0	0.838	0.419
800	LG2(N4)	61.341		0.04	5	0.791334	0.792614	0.791334	0.792614	6.34661e-05	0.6	0	0.852	0.426
801	LG2(N4)	62.341		0.04	5	0.791329	0.792629	0.791329	0.792629	6.34539e-05	0.7	0	0.87	0.435
802	LG2(N4)	63.341		0.04	5	0.791326	0.792641	0.791326	0.792641	6.34446e-05	0.7	0	0.893	0.446
803	LG2(N4)	64.341		0.05	5	0.791326	0.792652	0.791326	0.792652	6.34382e-05	0.7	0	0.92	0.46
804	LG2(N4)	65.341		0.05	4	0.791328	0.792659	0.791328	0.792659	6.34346e-05	0.7	0	0.951	0.475
805	LG2(N4)	66.341		0.05	4	0.791332	0.792665	0.791332	0.792665	6.34339e-05	0.7	0	0.986	0.493
806	LG2(N4)	66.691	CaiSSRD01B11-250	0.05	4	0.791333	0.792667	0.791333	0.792667	6.34343e-05	0.7	0	1	0.5
807	LG2(N4)	66.691	LmSSR13-4G	0.05	4	0.791333	0.792667	0.791333	0.792667	6.34343e-05	0.7	0	1	0.5
808	LG2(N4)	66.691	CaiSSRD01B11-200	0.05	4	0.791333	0.792667	0.791333	0.792667	6.34343e-05	0.7	0	1	0.5
809	LG2(N4)	66.691	TTA-ctca-700	0.05	4	0.791333	0.792667	0.791333	0.792667	6.34343e-05	0.7	0	1	0.5
810	LG2(N4)	66.691	TAC-ctgc	0.05	4	0.791333	0.792667	0.791333	0.792667	6.34343e-05	0.7	0	1	0.5
811	LG2(N4)	67.691		0.06	4	0.791263	0.792745	0.791263	0.792745	6.33303e-05	0.9	0	0.964	0.482
812	LG2(N4)	68.691		0.07	5	0.791203	0.792813	0.791203	0.792813	6.32322e-05	1	0	0.944	0.472
813	LG2(N4)	69.691		0.08	5	0.791157	0.792866	0.791157	0.792866	6.31501e-05	1.1	0	0.939	0.47
814	LG2(N4)	70.691		0.08	5	0.791127	0.792904	0.791127	0.792904	6.30913e-05	1.2	0	0.951	0.475
815	LG2(N4)	71.691		0.09	4	0.791113	0.792927	0.791113	0.792927	6.30588e-05	1.3	0	0.978	0.489
816	LG2(N4)	72.251	GAC-cgtt-360	0.09	4	0.791111	0.792933	0.791111	0.792933	6.30519e-05	1.3	0	1	0.5
817	LG2(N4)	73.251		0.07	4	0.791194	0.792845	0.791194	0.792845	6.31996e-05	1.1	0	0.934	0.467
818	LG2(N4)	74.251		0.06	4	0.791284	0.792747	0.791284	0.792747	6.33453e-05	0.8	0	0.888	0.444
819	LG2(N4)	75.251		0.04	4	0.79138	0.79264	0.79138	0.79264	6.34833e-05	0.6	0	0.862	0.431
820	LG2(N4)	76.251		0.03	4	0.791481	0.792523	0.791481	0.792523	6.36073e-05	0.4	0	0.856	0.428
821	LG2(N4)	77.251		0.02	4	0.791584	0.7924	0.791584	0.7924	6.37113e-05	0.3	0	0.87	0.435
822	LG2(N4)	78.251		0.01	4	0.791686	0.792273	0.791686	0.792273	6.37908e-05	0.1	0	0.904	0.452
823	LG2(N4)	79.251		0	4	0.791786	0.792145	0.791786	0.792145	6.38436e-05	0	0	0.959	0.479
824	LG2(N4)	79.836	GAG-cccg-200	0	3	0.791842	0.792071	0.791842	0.792071	6.38623e-05	0	0	1	0.5
825	LG3(N4)	0	TAA-ctga-480	0.05	4	0.792588	0.79125	0.792588	0.79125	6.34278e-05	0.7	0	1	0.5
826	LG3(N4)	1		0.05	4	0.792628	0.791214	0.792628	0.791214	6.33753e-05	0.8	0	0.962	0.481
827	LG3(N4)	2		0.06	5	0.792669	0.791176	0.792669	0.791176	6.33178e-05	0.9	0	0.927	0.463
828	LG3(N4)	3		0.06	5	0.792712	0.791137	0.792712	0.791137	6.32553e-05	1	0	0.894	0.447
829	LG3(N4)	4		0.07	6	0.792757	0.791098	0.792757	0.791098	6.31876e-05	1.1	0	0.864	0.432
830	LG3(N4)	5		0.07	6	0.792802	0.791058	0.792802	0.791058	6.3115e-05	1.2	0	0.835	0.418
831	LG3(N4)	6		0.08	6	0.792849	0.791018	0.792849	0.791018	6.30377e-05	1.3	0	0.81	0.405
832	LG3(N4)	7		0.08	7	0.792896	0.790978	0.792896	0.790978	6.29559e-05	1.4	0	0.786	0.393
833	LG3(N4)	8		0.09	7	0.792943	0.790939	0.792943	0.790939	6.28704e-05	1.6	0	0.765	0.382
834	LG3(N4)	9		0.09	7	0.792991	0.7909	0.792991	0.7909	6.27821e-05	1.7	0	0.746	0.373
835	LG3(N4)	10		0.1	7	0.793038	0.790862	0.793038	0.790862	6.26917e-05	1.9	0	0.729	0.364
836	LG3(N4)	11		0.1	8	0.793084	0.790825	0.793084	0.790825	6.26e-05	2	0	0.714	0.357
837	LG3(N4)	12		0.11	8	0.793129	0.790791	0.793129	0.790791	6.25088e-05	2.1	0	0.702	0.351
838	LG3(N4)	13		0.11	8	0.793172	0.790758	0.793172	0.790758	6.24191e-05	2.3	0	0.691	0.346
839	LG3(N4)	14		0.12	8	0.793213	0.790728	0.793213	0.790728	6.23322e-05	2.4	0	0.683	0.341
840	LG3(N4)	15		0.13	8	0.793252	0.790701	0.793252	0.790701	6.22495e-05	2.5	0	0.676	0.338
841	LG3(N4)	16		0.13	8	0.793288	0.790676	0.793288	0.790676	6.21722e-05	2.7	0	0.672	0.336
842	LG3(N4)	17		0.14	8	0.79332	0.790655	0.79332	0.790655	6.21014e-05	2.8	0	0.67	0.335
843	LG3(N4)	18		0.14	8	0.79335	0.790637	0.79335	0.790637	6.20381e-05	2.9	0	0.67	0.335
844	LG3(N4)	19		0.15	8	0.793376	0.790622	0.793376	0.790622	6.19831e-05	3	0	0.672	0.336
845	LG3(N4)	20		0.15	8	0.793398	0.790611	0.793398	0.790611	6.19371e-05	3	0	0.675	0.338
846	LG3(N4)	21		0.16	8	0.793417	0.790603	0.793417	0.790603	6.19005e-05	3.1	0	0.681	0.341
847	LG3(N4)	22		0.16	8	0.793432	0.790599	0.793432	0.790599	6.18736e-05	3.1	0	0.689	0.345
848	LG3(N4)	23		0.16	8	0.793443	0.790597	0.793443	0.790597	6.18564e-05	3.2	0	0.7	0.35
849	LG3(N4)	24		0.17	8	0.793451	0.790599	0.793451	0.790599	6.18489e-05	3.2	0	0.712	0.356
850	LG3(N4)	25		0.17	7	0.793455	0.790604	0.793455	0.790604	6.18511e-05	3.2	0	0.726	0.363
851	LG3(N4)	26		0.17	7	0.793455	0.790611	0.793455	0.790611	6.18617e-05	3.2	0	0.743	0.371
852	LG3(N4)	27		0.17	7	0.793453	0.790621	0.793453	0.790621	6.18808e-05	3.1	0	0.761	0.381
853	LG3(N4)	28		0.18	7	0.793447	0.790634	0.793447	0.790634	6.19075e-05	3.1	0	0.782	0.391
854	LG3(N4)	29		0.18	6	0.793438	0.790649	0.793438	0.790649	6.19415e-05	3	0	0.805	0.403
855	LG3(N4)	30		0.18	6	0.793427	0.790666	0.793427	0.790666	6.19813e-05	3	0	0.831	0.415
856	LG3(N4)	31		0.18	6	0.793413	0.790685	0.793413	0.790685	6.20266e-05	2.9	0	0.858	0.429
857	LG3(N4)	32		0.18	6	0.793397	0.790705	0.793397	0.790705	6.20764e-05	2.8	0	0.888	0.444
858	LG3(N4)	33		0.18	5	0.793378	0.790727	0.793378	0.790727	6.213e-05	2.7	0	0.921	0.46
859	LG3(N4)	34		0.18	5	0.793359	0.79075	0.793359	0.79075	6.21865e-05	2.6	0	0.956	0.478
860	LG3(N4)	35		0.18	4	0.793337	0.790773	0.793337	0.790773	6.22452e-05	2.6	0	0.993	0.497
861	LG3(N4)	35.179	LmSSR18-2E	0.18	4	0.793333	0.790778	0.793333	0.790778	6.22559e-05	2.5	0	1	0.5
862	LG3(N4)	36.179		0.16	5	0.793285	0.790838	0.793285	0.790838	6.23926e-05	2.3	0	0.962	0.481
863	LG3(N4)	37.179		0.14	5	0.793217	0.790911	0.793217	0.790911	6.25608e-05	2.1	0	0.935	0.468
864	LG3(N4)	38.179		0.11	5	0.793128	0.790998	0.793128	0.790998	6.27557e-05	1.8	0	0.919	0.459
865	LG3(N4)	39.179		0.09	5	0.793018	0.791098	0.793018	0.791098	6.29673e-05	1.4	0	0.913	0.456
866	LG3(N4)	40.179		0.07	5	0.792889	0.791209	0.792889	0.791209	6.31813e-05	1.1	0	0.917	0.459
867	LG3(N4)	41.179		0.05	5	0.792746	0.791327	0.792746	0.791327	6.3381e-05	0.8	0	0.932	0.466
868	LG3(N4)	42.179		0.03	4	0.792597	0.791447	0.792597	0.791447	6.35514e-05	0.5	0	0.958	0.479
869	LG3(N4)	43.179		0.02	4	0.792448	0.791564	0.792448	0.791564	6.36839e-05	0.3	0	0.994	0.497
870	LG3(N4)	43.315	LmSSR15-8G	0.02	4	0.792429	0.791579	0.792429	0.791579	6.36988e-05	0.3	0	1	0.5
871	LG3(N4)	44.315		0.01	4	0.792273	0.791712	0.792273	0.791712	6.37991e-05	0.1	0	0.969	0.484
872	LG3(N4)	45.315		0	4	0.792079	0.791852	0.792079	0.791852	6.38629e-05	0	0	0.967	0.483
873	LG3(N4)	46.315		0	3	0.791865	0.791983	0.791865	0.791983	6.38719e-05	0	0	0.994	0.497
874	LG3(N4)	46.461	GAG-cgga	0	3	0.791833	0.792	0.791833	0.792	6.38687e-05	0	0	1	0.5
875	LG3(N4)	47.461		0	4	0.791834	0.791998	0.791834	0.791998	6.3869e-05	0	0	0.942	0.471
876	LG3(N4)	48.461		0	4	0.791837	0.791994	0.791837	0.791994	6.38695e-05	0	0	0.901	0.45
877	LG3(N4)	49.461		0	4	0.791843	0.791989	0.791843	0.791989	6.38703e-05	0	0	0.876	0.438
878	LG3(N4)	50.461		0	4	0.791851	0.791984	0.791851	0.791984	6.38712e-05	0	0	0.866	0.433
879	LG3(N4)	51.461		0	4	0.791861	0.791977	0.791861	0.791977	6.38721e-05	0	0	0.873	0.437
880	LG3(N4)	52.461		0	4	0.791873	0.791971	0.791873	0.791971	6.3873e-05	0	0	0.896	0.448
881	LG3(N4)	53.461		0	4	0.791885	0.791964	0.791885	0.791964	6.38738e-05	0	0	0.935	0.468
882	LG3(N4)	54.461		0	3	0.791898	0.791957	0.791898	0.791957	6.38744e-05	0	0	0.991	0.495
883	LG3(N4)	54.605	TTA-cgtg-150	0	3	0.7919	0.791957	0.7919	0.791957	6.38744e-05	0	0	1	0.5
884	LG3(N4)	55.605		0	4	0.792034	0.791896	0.792034	0.791896	6.3871e-05	0	0	0.936	0.468
885	LG3(N4)	56.605		0	4	0.792168	0.791827	0.792168	0.791827	6.38495e-05	0	0	0.907	0.454
886	LG3(N4)	57.605		0.01	5	0.792285	0.791759	0.792285	0.791759	6.38127e-05	0.1	0	0.912	0.456
887	LG3(N4)	58.605		0.01	4	0.792374	0.791699	0.792374	0.791699	6.37709e-05	0.2	0	0.952	0.476
888	LG3(N4)	59.299	LmSSRH15-9F-360*	0.01	4	0.792417	0.791667	0.792417	0.791667	6.37449e-05	0.2	0	1	0.5
889	LG3(N4)	60.299		0.06	4	0.792861	0.791372	0.792861	0.791372	6.3352e-05	0.8	0	0.953	0.477
890	LG3(N4)	61.202	GTA-ccaa-300	0.11	4	0.793154	0.79115	0.793154	0.79115	6.29164e-05	1.5	0	1	0.5
891	LG3(N4)	62.202		0.19	5	0.79362	0.790852	0.79362	0.790852	6.20478e-05	2.9	0	0.953	0.477
892	LG3(N4)	63.202		0.3	5	0.794019	0.790595	0.794019	0.790595	6.10804e-05	4.4	0	0.941	0.47
893	LG3(N4)	64.202		0.4	5	0.79431	0.790404	0.79431	0.790404	6.02349e-05	5.7	0	0.963	0.481
894	LG3(N4)	64.927	TAT-ccaa-210	0.48	4	0.794462	0.7903	0.794462	0.7903	5.97403e-05	6.5	0	1	0.5
895	LG3(N4)	65.927		0.51	4	0.794443	0.790194	0.794443	0.790194	5.9505e-05	6.8	0	0.976	0.488
896	LG3(N4)	66.831	GTA-cact-160	0.53	4	0.794429	0.790105	0.794429	0.790105	5.93096e-05	7.1	0	1	0.5
897	LG3(N4)	66.831	GAC-cccc-180	0.53	4	0.794429	0.790105	0.794429	0.790105	5.93096e-05	7.1	0	1	0.5
898	LG3(N4)	66.831	ATG-cgat80	0.53	4	0.794429	0.790105	0.794429	0.790105	5.93096e-05	7.1	0	1	0.5
899	LG3(N4)	66.831	LmSSRH14-4A	0.53	4	0.794429	0.790105	0.794429	0.790105	5.93096e-05	7.1	0	1	0.5
900	LG3(N4)	67.831		0.39	5	0.794196	0.790361	0.794196	0.790361	6.03146e-05	5.6	0	0.977	0.488
901	LG3(N4)	68.58	ATG-ctag-150	0.27	4	0.793846	0.7907	0.793846	0.7907	6.15119e-05	3.7	0	1	0.5
902	LG3(N4)	69.58		0.3	5	0.793998	0.790603	0.793998	0.790603	6.11244e-05	4.3	0	0.967	0.484
903	LG3(N4)	70.58		0.32	6	0.794112	0.790524	0.794112	0.790524	6.07984e-05	4.8	0	0.944	0.472
904	LG3(N4)	71.58		0.34	6	0.794185	0.790463	0.794185	0.790463	6.05598e-05	5.2	0	0.929	0.465
905	LG3(N4)	72.58		0.36	6	0.794219	0.79042	0.794219	0.79042	6.0413e-05	5.4	0	0.924	0.462
906	LG3(N4)	73.58		0.37	6	0.794218	0.790392	0.794218	0.790392	6.03485e-05	5.5	0	0.928	0.464
907	LG3(N4)	74.58		0.38	5	0.794192	0.790375	0.794192	0.790375	6.03523e-05	5.5	0	0.941	0.471
908	LG3(N4)	75.58		0.38	5	0.794144	0.790368	0.794144	0.790368	6.04101e-05	5.4	0	0.963	0.482
909	LG3(N4)	76.58		0.39	4	0.794081	0.790368	0.794081	0.790368	6.05092e-05	5.3	0	0.995	0.497
910	LG3(N4)	76.72	LmSSR7-3E	0.39	4	0.794071	0.790368	0.794071	0.790368	6.05257e-05	5.2	0	1	0.5
911	LG3(N4)	77.72		0.39	5	0.794112	0.790329	0.794112	0.790329	6.03761e-05	5.5	0	0.951	0.476
912	LG3(N4)	78.72		0.38	5	0.794139	0.790305	0.794139	0.790305	6.0281e-05	5.6	0	0.912	0.456
913	LG3(N4)	79.72		0.38	6	0.794151	0.790298	0.794151	0.790298	6.02455e-05	5.7	0	0.882	0.441
914	LG3(N4)	80.72		0.37	6	0.794147	0.790308	0.794147	0.790308	6.02721e-05	5.6	0	0.862	0.431
915	LG3(N4)	81.72		0.35	6	0.794129	0.790334	0.794129	0.790334	6.03599e-05	5.5	0	0.851	0.426
916	LG3(N4)	82.72		0.34	6	0.794095	0.790376	0.794095	0.790376	6.05058e-05	5.3	0	0.851	0.425
917	LG3(N4)	83.72		0.32	6	0.794046	0.790434	0.794046	0.790434	6.07042e-05	5	0	0.859	0.43
918	LG3(N4)	84.72		0.3	6	0.793982	0.790506	0.793982	0.790506	6.09467e-05	4.6	0	0.877	0.439
919	LG3(N4)	85.72		0.28	5	0.793905	0.79059	0.793905	0.79059	6.12222e-05	4.2	0	0.905	0.452
920	LG3(N4)	86.72		0.25	5	0.793814	0.790682	0.793814	0.790682	6.15171e-05	3.7	0	0.942	0.471
921	LG3(N4)	87.72		0.23	4	0.793714	0.79078	0.793714	0.79078	6.18172e-05	3.2	0	0.989	0.495
922	LG3(N4)	87.924	GTT-ctcg-340	0.23	4	0.793692	0.7908	0.793692	0.7908	6.18779e-05	3.1	0	1	0.5
923	LG3(N4)	88.924		0.26	5	0.79382	0.790676	0.79382	0.790676	6.14998e-05	3.7	0	0.946	0.473
924	LG3(N4)	89.924		0.28	5	0.79393	0.790562	0.79393	0.790562	6.11328e-05	4.3	0	0.905	0.453
925	LG3(N4)	90.924		0.31	6	0.79402	0.790464	0.79402	0.790464	6.08051e-05	4.8	0	0.879	0.439
926	LG3(N4)	91.924		0.34	6	0.794086	0.790386	0.794086	0.790386	6.05413e-05	5.2	0	0.866	0.433
927	LG3(N4)	92.924		0.36	6	0.794128	0.790333	0.794128	0.790333	6.0359e-05	5.5	0	0.868	0.434
928	LG3(N4)	93.924		0.37	6	0.794146	0.790305	0.794146	0.790305	6.02695e-05	5.6	0	0.883	0.442
929	LG3(N4)	94.924		0.38	5	0.79414	0.790305	0.79414	0.790305	6.02777e-05	5.6	0	0.913	0.456
930	LG3(N4)	95.924		0.39	5	0.794111	0.790331	0.794111	0.790331	6.03822e-05	5.5	0	0.956	0.478
931	LG3(N4)	96.706	TAT-ccaa-110	0.39	4	0.794071	0.790368	0.794071	0.790368	6.05257e-05	5.2	0	1	0.5
932	LG3(N4)	97.706		0.52	6	0.79461	0.790086	0.79461	0.790086	5.89247e-05	7.8	0	0.973	0.486
933	LG3(N4)	98.706		0.65	6	0.794942	0.789928	0.794942	0.789928	5.78345e-05	9.5	0	0.964	0.482
934	LG3(N4)	99.706		0.75	5	0.795125	0.789846	0.795125	0.789846	5.7206e-05	10.4	0	0.973	0.486
935	LG3(N4)	100.699	LmSSR15-7C-100	0.84	4	0.795231	0.7898	0.795231	0.7898	5.68336e-05	11	0	1	0.5
936	LG3(N4)	101.699		0.84	4	0.795231	0.789799	0.795231	0.789799	5.68297e-05	11	0	0.976	0.488
937	LG3(N4)	102.699		0.84	4	0.795231	0.7898	0.795231	0.7898	5.68323e-05	11	0	0.992	0.496
938	LG3(N4)	102.895	ATA-cggt250	0.84	4	0.795231	0.7898	0.795231	0.7898	5.68336e-05	11	0	1	0.5
939	LG3(N4)	103.895		0.98	7	0.795714	0.78954	0.795714	0.78954	5.48174e-05	14.2	0	0.956	0.478
940	LG3(N4)	104.895		1.1	7	0.796001	0.789367	0.796001	0.789367	5.34241e-05	16.4	0	0.923	0.461
941	LG3(N4)	105.895		1.19	7	0.796131	0.789257	0.796131	0.789257	5.26336e-05	17.6	0	0.901	0.45
942	LG3(N4)	106.895		1.27	6	0.796176	0.78918	0.796176	0.78918	5.21857e-05	18.3	0	0.89	0.445
943	LG3(N4)	107.895		1.34	6	0.796178	0.78912	0.796178	0.78912	5.19261e-05	18.7	0	0.889	0.445
944	LG3(N4)	108.895		1.39	6	0.796154	0.789069	0.796154	0.789069	5.17804e-05	18.9	0	0.9	0.45
945	LG3(N4)	109.895		1.44	5	0.796114	0.789025	0.796114	0.789025	5.17107e-05	19	0	0.922	0.461
946	LG3(N4)	110.895		1.48	5	0.796062	0.788985	0.796062	0.788985	5.16959e-05	19.1	0	0.954	0.477
947	LG3(N4)	111.895		1.51	4	0.796003	0.788949	0.796003	0.788949	5.17234e-05	19	0	0.998	0.499
948	LG3(N4)	111.943	ATT-cggt200	1.51	4	0.796	0.788947	0.796	0.788947	5.17257e-05	19	0	1	0.5
949	LG4(N4)	0	AAA-caca-200	0.21	4	0.790467	0.793167	0.790467	0.793167	6.20677e-05	2.8	0	1	0.5
950	LG4(N4)	1		0.2	4	0.790475	0.793151	0.790475	0.793151	6.21003e-05	2.8	0	0.967	0.483
951	LG4(N4)	2		0.19	4	0.790485	0.793134	0.790485	0.793134	6.21369e-05	2.7	0	0.938	0.469
952	LG4(N4)	3		0.19	4	0.790497	0.793116	0.790497	0.793116	6.21774e-05	2.7	0	0.914	0.457
953	LG4(N4)	4		0.18	5	0.79051	0.793096	0.79051	0.793096	6.22217e-05	2.6	0	0.895	0.447
954	LG4(N4)	5		0.18	5	0.790526	0.793075	0.790526	0.793075	6.22695e-05	2.5	0	0.88	0.44
955	LG4(N4)	6		0.17	5	0.790543	0.793053	0.790543	0.793053	6.23205e-05	2.4	0	0.87	0.435
956	LG4(N4)	7		0.16	5	0.790563	0.793029	0.790563	0.793029	6.23746e-05	2.3	0	0.864	0.432
957	LG4(N4)	8		0.16	5	0.790584	0.793004	0.790584	0.793004	6.24313e-05	2.3	0	0.863	0.432
958	LG4(N4)	9		0.15	5	0.790606	0.792978	0.790606	0.792978	6.24902e-05	2.2	0	0.867	0.433
959	LG4(N4)	10		0.14	5	0.79063	0.792951	0.79063	0.792951	6.2551e-05	2.1	0	0.875	0.437
960	LG4(N4)	11		0.14	5	0.790656	0.792923	0.790656	0.792923	6.26132e-05	2	0	0.888	0.444
961	LG4(N4)	12		0.13	4	0.790683	0.792894	0.790683	0.792894	6.26764e-05	1.9	0	0.905	0.453
962	LG4(N4)	13		0.13	4	0.790712	0.792864	0.790712	0.792864	6.27401e-05	1.8	0	0.927	0.464
963	LG4(N4)	14		0.12	4	0.790742	0.792834	0.790742	0.792834	6.2804e-05	1.7	0	0.954	0.477
964	LG4(N4)	15		0.11	4	0.790772	0.792803	0.790772	0.792803	6.28674e-05	1.6	0	0.985	0.493
965	LG4(N4)	15.428	AAA-caca-240	0.11	4	0.790786	0.792789	0.790786	0.792789	6.28944e-05	1.5	0	1	0.5
966	LG4(N4)	16.428		0.11	4	0.790785	0.79279	0.790785	0.79279	6.2894e-05	1.5	0	0.965	0.482
967	LG4(N4)	17.428		0.11	4	0.790786	0.792789	0.790786	0.792789	6.28944e-05	1.5	0	0.997	0.499
968	LG4(N4)	17.471	CaiSSRB02F09	0.11	4	0.790786	0.792789	0.790786	0.792789	6.28944e-05	1.5	0	1	0.5
969	LG4(N4)	18.471		0.09	4	0.790928	0.792716	0.790928	0.792716	6.30898e-05	1.2	0	0.967	0.484
970	LG4(N4)	19.471		0.07	4	0.79108	0.792629	0.79108	0.792629	6.32824e-05	0.9	0	0.971	0.486
971	LG4(N4)	20.237	LmSSR15-11G-180	0.05	4	0.7912	0.792556	0.7912	0.792556	6.34195e-05	0.7	0	1	0.5
972	LG4(N4)	21.237		0.04	4	0.791298	0.792452	0.791298	0.792452	6.35467e-05	0.5	0	0.967	0.484
973	LG4(N4)	22.237		0.02	4	0.79141	0.792344	0.79141	0.792344	6.36608e-05	0.3	0	0.972	0.486
974	LG4(N4)	22.985	TAG-cctg-170	0.02	4	0.7915	0.792263	0.7915	0.792263	6.37329e-05	0.2	0	1	0.5
975	LG4(N4)	23.985		0.02	4	0.7915	0.792263	0.7915	0.792263	6.37328e-05	0.2	0	0.981	0.49
976	LG4(N4)	24.384	GTC-cgct-210	0.02	4	0.7915	0.792263	0.7915	0.792263	6.37329e-05	0.2	0	1	0.5
977	LG4(N4)	25.384		0.02	4	0.7915	0.792263	0.7915	0.792263	6.37328e-05	0.2	0	0.977	0.488
978	LG4(N4)	26.384		0.02	4	0.7915	0.792263	0.7915	0.792263	6.37328e-05	0.2	0	0.988	0.494
979	LG4(N4)	26.722	ATA-cctt110	0.02	4	0.7915	0.792263	0.7915	0.792263	6.37329e-05	0.2	0	1	0.5
980	LG4(N4)	26.722	TTC-cccg-380	0.02	4	0.7915	0.792263	0.7915	0.792263	6.37329e-05	0.2	0	1	0.5
981	LG4(N4)	27.234	GTG-ccag-260	0.02	4	0.7915	0.792263	0.7915	0.792263	6.37329e-05	0.2	0	1	0.5
982	LG4(N4)	27.234	GTA-cggt-180	0.02	4	0.7915	0.792263	0.7915	0.792263	6.37329e-05	0.2	0	1	0.5
983	LG4(N4)	27.97	CaiSSRB08G02-170	0.02	4	0.7915	0.792263	0.7915	0.792263	6.37329e-05	0.2	0	1	0.5
984	LG4(N4)	28.97		0.02	4	0.7915	0.792263	0.7915	0.792263	6.37328e-05	0.2	0	0.965	0.482
985	LG4(N4)	29.844	ATG-cgat280	0.02	4	0.7915	0.792263	0.7915	0.792263	6.37329e-05	0.2	0	1	0.5
986	LG4(N4)	30.156	TAC-cagc-300	0.02	4	0.7915	0.792263	0.7915	0.792263	6.37329e-05	0.2	0	1	0.5
987	LG4(N4)	31.156		0.02	4	0.7915	0.792263	0.7915	0.792263	6.37329e-05	0.2	0	0.999	0.499
988	LG4(N4)	31.188	GAA-cgtg-460	0.02	4	0.7915	0.792263	0.7915	0.792263	6.37329e-05	0.2	0	1	0.5
989	LG4(N4)	32.188		0.01	4	0.791563	0.792227	0.791563	0.792227	6.37667e-05	0.2	0	0.958	0.479
990	LG4(N4)	33.188		0.01	5	0.791631	0.792184	0.791631	0.792184	6.37997e-05	0.1	0	0.92	0.46
991	LG4(N4)	34.188		0	5	0.791704	0.792133	0.791704	0.792133	6.38295e-05	0.1	0	0.887	0.443
992	LG4(N4)	35.188		0	5	0.791781	0.792075	0.791781	0.792075	6.38536e-05	0	0	0.859	0.429
993	LG4(N4)	36.188		0	5	0.791861	0.792009	0.791861	0.792009	6.38697e-05	0	0	0.835	0.417
994	LG4(N4)	37.188		0	3	0.791943	0.791936	0.791943	0.791936	6.38751e-05	0	0	0.816	0.408
995	LG4(N4)	38.188		0	5	0.792026	0.791857	0.792026	0.791857	6.3868e-05	0	0	0.801	0.4
996	LG4(N4)	39.188		0	5	0.792108	0.791772	0.792108	0.791772	6.3847e-05	0	0	0.791	0.395
997	LG4(N4)	40.188		0.01	6	0.792188	0.791683	0.792188	0.791683	6.38114e-05	0.1	0	0.785	0.392
998	LG4(N4)	41.188		0.01	6	0.792264	0.79159	0.792264	0.79159	6.37618e-05	0.2	0	0.784	0.392
999	LG4(N4)	42.188		0.01	6	0.792336	0.791497	0.792336	0.791497	6.36996e-05	0.3	0	0.787	0.393
1000	LG4(N4)	43.188		0.02	6	0.792402	0.791403	0.792402	0.791403	6.36271e-05	0.4	0	0.794	0.397
1001	LG4(N4)	44.188		0.03	6	0.792461	0.791311	0.792461	0.791311	6.35476e-05	0.5	0	0.806	0.403
1002	LG4(N4)	45.188		0.04	6	0.792512	0.791223	0.792512	0.791223	6.34646e-05	0.6	0	0.823	0.412
1003	LG4(N4)	46.188		0.05	6	0.792556	0.79114	0.792556	0.79114	6.3382e-05	0.8	0	0.844	0.422
1004	LG4(N4)	47.188		0.05	6	0.792591	0.791062	0.792591	0.791062	6.33035e-05	0.9	0	0.87	0.435
1005	LG4(N4)	48.188		0.06	5	0.792618	0.790992	0.792618	0.790992	6.32323e-05	1	0	0.9	0.45
1006	LG4(N4)	49.188		0.07	5	0.792636	0.790929	0.792636	0.790929	6.31709e-05	1.1	0	0.935	0.468
1007	LG4(N4)	50.188		0.08	4	0.792647	0.790874	0.792647	0.790874	6.31213e-05	1.2	0	0.975	0.487
1008	LG4(N4)	50.772	TCA-cgta	0.09	4	0.79265	0.790846	0.79265	0.790846	6.30983e-05	1.2	0	1	0.5
1009	LG4(N4)	50.848	TAG-ccac	0.09	4	0.79265	0.790846	0.79265	0.790846	6.30983e-05	1.2	0	1	0.5
1010	LG4(N4)	51.579	GGC-cttc	0.09	4	0.79265	0.790846	0.79265	0.790846	6.30983e-05	1.2	0	1	0.5
1011	LG4(N4)	52.515	ATA-ccat300	0.09	4	0.79265	0.790846	0.79265	0.790846	6.30983e-05	1.2	0	1	0.5
1012	LG4(N4)	53.515		0.1	4	0.792735	0.79074	0.792735	0.79074	6.29217e-05	1.5	0	0.949	0.474
1013	LG4(N4)	54.515		0.12	5	0.792817	0.790641	0.792817	0.790641	6.27356e-05	1.8	0	0.911	0.456
1014	LG4(N4)	55.515		0.14	5	0.792896	0.79055	0.792896	0.79055	6.25466e-05	2.1	0	0.888	0.444
1015	LG4(N4)	56.515		0.16	5	0.792969	0.790468	0.792969	0.790468	6.23611e-05	2.4	0	0.878	0.439
1016	LG4(N4)	57.515		0.18	5	0.793035	0.790396	0.793035	0.790396	6.21841e-05	2.6	0	0.882	0.441
1017	LG4(N4)	58.515		0.2	5	0.793094	0.790333	0.793094	0.790333	6.20192e-05	2.9	0	0.9	0.45
1018	LG4(N4)	59.515		0.22	4	0.793147	0.790278	0.793147	0.790278	6.18687e-05	3.1	0	0.932	0.466
1019	LG4(N4)	60.515		0.24	4	0.793193	0.790231	0.793193	0.790231	6.17333e-05	3.4	0	0.977	0.489
1020	LG4(N4)	60.925	AAG-cacg-340	0.25	4	0.793211	0.790214	0.793211	0.790214	6.16823e-05	3.4	0	1	0.5
1021	LG4(N4)	61.925		0.23	4	0.793134	0.790269	0.793134	0.790269	6.18803e-05	3.1	0	0.952	0.476
1022	LG4(N4)	62.925		0.2	4	0.793048	0.790336	0.793048	0.790336	6.20967e-05	2.8	0	0.942	0.471
1023	LG4(N4)	63.925		0.17	4	0.792954	0.790414	0.792954	0.790414	6.23265e-05	2.4	0	0.969	0.485
1024	LG4(N4)	64.473	LmSSR16-3F-110	0.16	4	0.7929	0.790462	0.7929	0.790462	6.24555e-05	2.2	0	1	0.5
1025	LG4(N4)	65.473		0.16	4	0.792901	0.790461	0.792901	0.790461	6.24542e-05	2.2	0	0.978	0.489
1026	LG4(N4)	66.473		0.16	4	0.792901	0.790461	0.792901	0.790461	6.24542e-05	2.2	0	0.979	0.49
1027	LG4(N4)	67.404	LmSSR18-2B-390*	0.16	4	0.7929	0.790462	0.7929	0.790462	6.24555e-05	2.2	0	1	0.5
1028	LG4(N4)	68.404		0.24	5	0.7931	0.790049	0.7931	0.790049	6.16815e-05	3.4	0	0.979	0.489
1029	LG4(N4)	69.404		0.31	5	0.79324	0.789729	0.79324	0.789729	6.10003e-05	4.5	0	0.978	0.489
1030	LG4(N4)	70.404		0.39	4	0.793329	0.789511	0.793329	0.789511	6.05014e-05	5.3	0	0.998	0.499
1031	LG4(N4)	70.469	ATA-ctaa-300	0.39	4	0.793333	0.7895	0.793333	0.7895	6.04747e-05	5.3	0	1	0.5
1032	LG4(N4)	71.469		0.38	5	0.79332	0.789507	0.79332	0.789507	6.05167e-05	5.3	0	0.967	0.484
1033	LG4(N4)	72.469		0.36	5	0.793303	0.789523	0.793303	0.789523	6.05806e-05	5.2	0	0.941	0.47
1034	LG4(N4)	73.469		0.34	5	0.79328	0.789549	0.79328	0.789549	6.06701e-05	5	0	0.92	0.46
1035	LG4(N4)	74.469		0.32	6	0.793252	0.789589	0.793252	0.789589	6.07896e-05	4.8	0	0.906	0.453
1036	LG4(N4)	75.469		0.29	6	0.793217	0.789645	0.793217	0.789645	6.09435e-05	4.6	0	0.897	0.448
1037	LG4(N4)	76.469		0.27	6	0.793174	0.78972	0.793174	0.78972	6.1136e-05	4.3	0	0.894	0.447
1038	LG4(N4)	77.469		0.24	6	0.79312	0.789817	0.79312	0.789817	6.13693e-05	3.9	0	0.897	0.449
1039	LG4(N4)	78.469		0.22	6	0.793056	0.789938	0.793056	0.789938	6.16412e-05	3.5	0	0.906	0.453
1040	LG4(N4)	79.469		0.19	6	0.79298	0.790082	0.79298	0.790082	6.19427e-05	3	0	0.921	0.461
1041	LG4(N4)	80.469		0.17	5	0.792894	0.790245	0.792894	0.790245	6.22568e-05	2.5	0	0.942	0.471
1042	LG4(N4)	81.469		0.14	5	0.792803	0.790418	0.792803	0.790418	6.25618e-05	2.1	0	0.969	0.485
1043	LG4(N4)	82.415	AAC-ccgt250	0.12	4	0.792714	0.790583	0.792714	0.790583	6.28243e-05	1.6	0	1	0.5
1044	LG4(N4)	83.415		0.12	4	0.792733	0.790594	0.792733	0.790594	6.28082e-05	1.7	0	0.963	0.482
1045	LG4(N4)	84.415		0.12	4	0.792748	0.790609	0.792748	0.790609	6.27985e-05	1.7	0	0.937	0.468
1046	LG4(N4)	85.415		0.12	4	0.792762	0.790627	0.792762	0.790627	6.27956e-05	1.7	0	0.92	0.46
1047	LG4(N4)	86.415		0.12	4	0.792773	0.790649	0.792773	0.790649	6.27994e-05	1.7	0	0.912	0.456
1048	LG4(N4)	87.415		0.12	4	0.792781	0.790674	0.792781	0.790674	6.28099e-05	1.7	0	0.915	0.457
1049	LG4(N4)	88.415		0.12	4	0.792787	0.790702	0.792787	0.790702	6.28268e-05	1.6	0	0.927	0.463
1050	LG4(N4)	89.415		0.11	4	0.79279	0.790733	0.79279	0.790733	6.28496e-05	1.6	0	0.948	0.474
1051	LG4(N4)	90.415		0.11	4	0.79279	0.790767	0.79279	0.790767	6.28777e-05	1.6	0	0.98	0.49
1052	LG4(N4)	90.942	GAT-cggt-160	0.11	4	0.792789	0.790786	0.792789	0.790786	6.28944e-05	1.5	0	1	0.5
1053	LG4(N4)	91.942		0.11	4	0.79279	0.790785	0.79279	0.790785	6.28936e-05	1.5	0	0.966	0.483
1054	LG4(N4)	92.942		0.11	4	0.79279	0.790785	0.79279	0.790785	6.28938e-05	1.5	0	0.975	0.487
1055	LG4(N4)	93.548	AAA-caca-120	0.11	4	0.792789	0.790786	0.792789	0.790786	6.28944e-05	1.5	0	1	0.5
1056	LG4(N4)	94.548		0.12	5	0.79284	0.790735	0.79284	0.790735	6.279e-05	1.7	0	0.961	0.481
1057	LG4(N4)	95.548		0.12	5	0.792885	0.790692	0.792885	0.790692	6.2695e-05	1.8	0	0.93	0.465
1058	LG4(N4)	96.548		0.13	5	0.792924	0.790658	0.792924	0.790658	6.26145e-05	2	0	0.908	0.454
1059	LG4(N4)	97.548		0.13	5	0.792954	0.790635	0.792954	0.790635	6.25525e-05	2.1	0	0.893	0.446
1060	LG4(N4)	98.548		0.14	5	0.792975	0.790623	0.792975	0.790623	6.25116e-05	2.1	0	0.886	0.443
1061	LG4(N4)	99.548		0.14	5	0.792988	0.79062	0.792988	0.79062	6.24927e-05	2.2	0	0.886	0.443
1062	LG4(N4)	100.548		0.14	5	0.792992	0.790628	0.792992	0.790628	6.24953e-05	2.2	0	0.895	0.448
1063	LG4(N4)	101.548		0.14	5	0.792988	0.790645	0.792988	0.790645	6.25177e-05	2.1	0	0.912	0.456
1064	LG4(N4)	102.548		0.14	5	0.792978	0.790671	0.792978	0.790671	6.25577e-05	2.1	0	0.936	0.468
1065	LG4(N4)	103.548		0.14	4	0.792961	0.790703	0.792961	0.790703	6.26121e-05	2	0	0.969	0.484
1066	LG4(N4)	104.336	LmSSR16-3F-120	0.14	4	0.792944	0.790733	0.792944	0.790733	6.2663e-05	1.9	0	1	0.5
1067	LG4(N4)	105.336		0.15	4	0.792992	0.790676	0.792992	0.790676	6.25445e-05	2.1	0	0.963	0.481
1068	LG4(N4)	106.336		0.16	4	0.793037	0.790622	0.793037	0.790622	6.24289e-05	2.3	0	0.936	0.468
1069	LG4(N4)	107.336		0.17	5	0.793079	0.790573	0.793079	0.790573	6.23185e-05	2.4	0	0.919	0.46
1070	LG4(N4)	108.336		0.18	5	0.793116	0.790529	0.793116	0.790529	6.22157e-05	2.6	0	0.912	0.456
1071	LG4(N4)	109.336		0.19	5	0.793149	0.79049	0.793149	0.79049	6.21226e-05	2.7	0	0.916	0.458
1072	LG4(N4)	110.336		0.2	5	0.793177	0.790457	0.793177	0.790457	6.20409e-05	2.9	0	0.929	0.465
1073	LG4(N4)	111.336		0.21	4	0.7932	0.790429	0.7932	0.790429	6.19716e-05	3	0	0.953	0.476
1074	LG4(N4)	112.336		0.22	4	0.793217	0.790406	0.793217	0.790406	6.19156e-05	3.1	0	0.987	0.493
1075	LG4(N4)	112.661	ATC-cgct300	0.23	4	0.793222	0.7904	0.793222	0.7904	6.19003e-05	3.1	0	1	0.5
1076	LG5(N4)	0	AGT-cgat280	0.6	4	0.788727	0.793545	0.788727	0.793545	5.87163e-05	8.1	0	1	0.5
1077	LG5(N4)	1		0.55	5	0.788767	0.793516	0.788767	0.793516	5.88745e-05	7.8	0	0.969	0.484
1078	LG5(N4)	2		0.48	6	0.788912	0.793458	0.788912	0.793458	5.92767e-05	7.2	0	0.953	0.477
1079	LG5(N4)	3		0.41	6	0.789182	0.793363	0.789182	0.793363	5.99506e-05	6.1	0	0.953	0.477
1080	LG5(N4)	4		0.32	5	0.789568	0.793221	0.789568	0.793221	6.08352e-05	4.8	0	0.969	0.485
1081	LG5(N4)	4.979	TAT-cagt-100	0.25	4	0.79	0.793048	0.79	0.793048	6.17258e-05	3.4	0	1	0.5
1082	LG5(N4)	5.979		0.28	5	0.789834	0.793186	0.789834	0.793186	6.12519e-05	4.1	0	0.961	0.481
1083	LG5(N4)	6.979		0.33	6	0.789668	0.793332	0.789668	0.793332	6.07115e-05	5	0	0.927	0.463
1084	LG5(N4)	7.979		0.37	6	0.789504	0.793484	0.789504	0.793484	6.01119e-05	5.9	0	0.896	0.448
1085	LG5(N4)	8.979		0.42	7	0.789347	0.79364	0.789347	0.79364	5.94672e-05	6.9	0	0.87	0.435
1086	LG5(N4)	9.979		0.47	7	0.789203	0.793794	0.789203	0.793794	5.87991e-05	7.9	0	0.847	0.423
1087	LG5(N4)	10.979		0.52	8	0.789075	0.793944	0.789075	0.793944	5.81314e-05	9	0	0.828	0.414
1088	LG5(N4)	11.979		0.57	8	0.788965	0.794087	0.788965	0.794087	5.74892e-05	10	0	0.813	0.407
1089	LG5(N4)	12.979		0.63	8	0.788876	0.794219	0.788876	0.794219	5.68919e-05	10.9	0	0.802	0.401
1090	LG5(N4)	13.979		0.68	8	0.788807	0.79434	0.788807	0.79434	5.6353e-05	11.8	0	0.795	0.397
1091	LG5(N4)	14.979		0.73	8	0.788755	0.794451	0.788755	0.794451	5.58795e-05	12.5	0	0.791	0.395
1092	LG5(N4)	15.979		0.78	8	0.788721	0.79455	0.788721	0.79455	5.54734e-05	13.2	0	0.791	0.396
1093	LG5(N4)	16.979		0.83	8	0.788702	0.79464	0.788702	0.79464	5.51333e-05	13.7	0	0.795	0.398
1094	LG5(N4)	17.979		0.88	7	0.788696	0.79472	0.788696	0.79472	5.4856e-05	14.1	0	0.803	0.401
1095	LG5(N4)	18.979		0.92	7	0.788701	0.794792	0.788701	0.794792	5.46361e-05	14.5	0	0.814	0.407
1096	LG5(N4)	19.979		0.96	7	0.788715	0.794857	0.788715	0.794857	5.44692e-05	14.7	0	0.83	0.415
1097	LG5(N4)	20.979		1	7	0.788738	0.794915	0.788738	0.794915	5.43505e-05	14.9	0	0.849	0.425
1098	LG5(N4)	21.979		1.04	6	0.788769	0.794967	0.788769	0.794967	5.42756e-05	15	0	0.872	0.436
1099	LG5(N4)	22.979		1.07	6	0.788806	0.795014	0.788806	0.795014	5.42399e-05	15.1	0	0.899	0.45
1100	LG5(N4)	23.979		1.1	6	0.788848	0.795057	0.788848	0.795057	5.42397e-05	15.1	0	0.93	0.465
1101	LG5(N4)	24.979		1.13	5	0.788895	0.795094	0.788895	0.795094	5.42713e-05	15	0	0.965	0.483
1102	LG5(N4)	25.875	AAT-cgct150	1.16	4	0.788941	0.795125	0.788941	0.795125	5.4324e-05	15	0	1	0.5
1103	LG5(N4)	26.875		1.04	5	0.789066	0.795061	0.789066	0.795061	5.49058e-05	14	0	0.96	0.48
1104	LG5(N4)	27.875		0.9	6	0.789248	0.79496	0.789248	0.79496	5.57434e-05	12.7	0	0.941	0.471
1105	LG5(N4)	28.875		0.75	6	0.789513	0.794799	0.789513	0.794799	5.6937e-05	10.9	0	0.944	0.472
1106	LG5(N4)	29.875		0.59	5	0.78988	0.794547	0.78988	0.794547	5.85041e-05	8.4	0	0.967	0.484
1107	LG5(N4)	30.646	ATT-ccat300	0.47	4	0.790211	0.794286	0.790211	0.794286	5.98186e-05	6.4	0	1	0.5
1108	LG5(N4)	31.25	GAC-cagt-100	0.47	4	0.790211	0.794286	0.790211	0.794286	5.98186e-05	6.4	0	1	0.5
1109	LG5(N4)	32.03	CaiSSRB03C04-190	0.47	4	0.790211	0.794286	0.790211	0.794286	5.98186e-05	6.4	0	1	0.5
1110	LG5(N4)	32.699	LmSSRT132E-100*	0.47	4	0.790211	0.794286	0.790211	0.794286	5.98186e-05	6.4	0	1	0.5
1111	LG5(N4)	32.699	CaiSSRB03C04-170	0.47	4	0.790211	0.794286	0.790211	0.794286	5.98186e-05	6.4	0	1	0.5
1112	LG5(N4)	33.699		0.28	5	0.790627	0.793882	0.790627	0.793882	6.13261e-05	4	0	0.992	0.496
1113	LG5(N4)	33.959	ATT-ctat-200	0.23	4	0.7908	0.793692	0.7908	0.793692	6.18779e-05	3.1	0	1	0.5
1114	LG5(N4)	33.959	TTG-ccgg	0.23	4	0.7908	0.793692	0.7908	0.793692	6.18779e-05	3.1	0	1	0.5
1115	LG5(N4)	34.959		0.29	5	0.790704	0.794058	0.790704	0.794058	6.12568e-05	4.1	0	0.967	0.483
1116	LG5(N4)	35.959		0.37	5	0.79063	0.794411	0.79063	0.794411	6.06373e-05	5.1	0	0.973	0.486
1117	LG5(N4)	36.656	LmSSR16-4F-260	0.42	4	0.790591	0.794636	0.790591	0.794636	6.02383e-05	5.7	0	1	0.5
1118	LG5(N4)	37.656		0.29	5	0.790792	0.794279	0.790792	0.794279	6.11907e-05	4.2	0	0.934	0.467
1119	LG5(N4)	38.656		0.17	5	0.791046	0.793811	0.791046	0.793811	6.22034e-05	2.6	0	0.906	0.453
1120	LG5(N4)	39.656		0.08	5	0.791343	0.793233	0.791343	0.793233	6.31041e-05	1.2	0	0.916	0.458
1121	LG5(N4)	40.656		0.02	4	0.791647	0.792599	0.791647	0.792599	6.36824e-05	0.3	0	0.964	0.482
1122	LG5(N4)	41.138	ATC-caac-250	0.01	4	0.791783	0.7923	0.791783	0.7923	6.38186e-05	0.1	0	1	0.5
1123	LG5(N4)	42.138		0.02	5	0.792257	0.791284	0.792257	0.791284	6.36673e-05	0.3	0	0.991	0.495
1124	LG5(N4)	42.518	GTA-cggt-100	0.05	4	0.792409	0.791	0.792409	0.791	6.34339e-05	0.7	0	1	0.5
1125	LG5(N4)	43.518		0.05	4	0.792397	0.79101	0.792397	0.79101	6.34493e-05	0.7	0	0.968	0.484
1126	LG5(N4)	44.518		0.05	4	0.792385	0.79102	0.792385	0.79102	6.34651e-05	0.6	0	0.944	0.472
1127	LG5(N4)	45.518		0.04	4	0.792373	0.791031	0.792373	0.791031	6.34812e-05	0.6	0	0.93	0.465
1128	LG5(N4)	46.518		0.04	4	0.79236	0.791043	0.79236	0.791043	6.34975e-05	0.6	0	0.924	0.462
1129	LG5(N4)	47.518		0.04	4	0.792348	0.791055	0.792348	0.791055	6.35141e-05	0.6	0	0.927	0.464
1130	LG5(N4)	48.518		0.04	4	0.792335	0.791068	0.792335	0.791068	6.35308e-05	0.5	0	0.939	0.47
1131	LG5(N4)	49.518		0.04	4	0.792321	0.791082	0.792321	0.791082	6.35475e-05	0.5	0	0.96	0.48
1132	LG5(N4)	50.518		0.03	4	0.792308	0.791096	0.792308	0.791096	6.35643e-05	0.5	0	0.99	0.495
1133	LG5(N4)	50.788	TTG-cgta-170	0.03	4	0.792304	0.7911	0.792304	0.7911	6.35688e-05	0.5	0	1	0.5
1134	LG5(N4)	51.788		0.03	4	0.792305	0.7911	0.792305	0.7911	6.35683e-05	0.5	0	0.973	0.486
1135	LG5(N4)	52.788		0.03	4	0.792305	0.791099	0.792305	0.791099	6.35682e-05	0.5	0	0.964	0.482
1136	LG5(N4)	53.788		0.03	4	0.792305	0.7911	0.792305	0.7911	6.35683e-05	0.5	0	0.972	0.486
1137	LG5(N4)	54.788		0.03	4	0.792304	0.7911	0.792304	0.7911	6.35687e-05	0.5	0	0.997	0.499
1138	LG5(N4)	54.87	GAA-ctaa-150	0.03	4	0.792304	0.7911	0.792304	0.7911	6.35688e-05	0.5	0	1	0.5
1139	LG5(N4)	55.87		0.05	5	0.792397	0.79097	0.792397	0.79097	6.3432e-05	0.7	0	0.97	0.485
1140	LG5(N4)	56.87		0.06	5	0.79249	0.790861	0.79249	0.790861	6.3281e-05	0.9	0	0.95	0.475
1141	LG5(N4)	57.87		0.07	6	0.792577	0.79078	0.792577	0.79078	6.3135e-05	1.2	0	0.939	0.469
1142	LG5(N4)	58.87		0.08	6	0.792653	0.790732	0.792653	0.790732	6.30132e-05	1.3	0	0.938	0.469
1143	LG5(N4)	59.87		0.09	5	0.792713	0.790717	0.792713	0.790717	6.2929e-05	1.5	0	0.946	0.473
1144	LG5(N4)	60.87		0.1	5	0.792757	0.790732	0.792757	0.790732	6.28877e-05	1.5	0	0.963	0.482
1145	LG5(N4)	61.87		0.11	4	0.792785	0.790771	0.792785	0.790771	6.28879e-05	1.5	0	0.991	0.495
1146	LG5(N4)	62.146	TTT-cgtc-200	0.11	4	0.792789	0.790786	0.792789	0.790786	6.28944e-05	1.5	0	1	0.5
1147	LG5(N4)	63.146		0.09	4	0.792729	0.790873	0.792729	0.790873	6.30333e-05	1.3	0	0.961	0.481
1148	LG5(N4)	64.146		0.07	5	0.79266	0.790971	0.79266	0.790971	6.31772e-05	1.1	0	0.928	0.464
1149	LG5(N4)	65.146		0.06	5	0.792581	0.791079	0.792581	0.791079	6.33227e-05	0.9	0	0.9	0.45
1150	LG5(N4)	66.146		0.04	5	0.792493	0.791198	0.792493	0.791198	6.34646e-05	0.6	0	0.878	0.439
1151	LG5(N4)	67.146		0.03	5	0.792396	0.791329	0.792396	0.791329	6.35964e-05	0.4	0	0.861	0.43
1152	LG5(N4)	68.146		0.02	6	0.79229	0.79147	0.79229	0.79147	6.37104e-05	0.3	0	0.848	0.424
1153	LG5(N4)	69.146		0.01	5	0.792178	0.79162	0.792178	0.79162	6.37989e-05	0.1	0	0.841	0.421
1154	LG5(N4)	70.146		0	5	0.792061	0.791775	0.792061	0.791775	6.38551e-05	0	0	0.84	0.42
1155	LG5(N4)	71.146		0	3	0.791944	0.791933	0.791944	0.791933	6.38751e-05	0	0	0.843	0.422
1156	LG5(N4)	72.146		0	5	0.79183	0.792088	0.79183	0.792088	6.38588e-05	0	0	0.852	0.426
1157	LG5(N4)	73.146		0.01	5	0.791721	0.792237	0.791721	0.792237	6.381e-05	0.1	0	0.865	0.433
1158	LG5(N4)	74.146		0.01	5	0.791619	0.792376	0.791619	0.792376	6.3735e-05	0.2	0	0.884	0.442
1159	LG5(N4)	75.146		0.02	5	0.791525	0.792504	0.791525	0.792504	6.36412e-05	0.4	0	0.909	0.454
1160	LG5(N4)	76.146		0.04	5	0.79144	0.792619	0.79144	0.792619	6.35358e-05	0.5	0	0.938	0.469
1161	LG5(N4)	77.146		0.05	4	0.791364	0.792722	0.791364	0.792722	6.34248e-05	0.7	0	0.973	0.486
1162	LG5(N4)	77.838	GTG-cgat	0.06	4	0.791316	0.792786	0.791316	0.792786	6.33473e-05	0.8	0	1	0.5
1163	LG6(N4)	0	TCT-catt-190	0.05	4	0.791333	0.792667	0.791333	0.792667	6.34343e-05	0.7	0	0.996	0.498
1164	LG6(N4)	1		0.07	4	0.791235	0.792795	0.791235	0.792795	6.32726e-05	0.9	0	0.956	0.478
1165	LG6(N4)	2		0.08	5	0.791137	0.792927	0.791137	0.792927	6.30834e-05	1.2	0	0.925	0.462
1166	LG6(N4)	3		0.1	5	0.791043	0.793057	0.791043	0.793057	6.28727e-05	1.6	0	0.902	0.451
1167	LG6(N4)	4		0.12	5	0.790954	0.793184	0.790954	0.793184	6.26491e-05	1.9	0	0.889	0.444
1168	LG6(N4)	5		0.15	5	0.790874	0.793303	0.790874	0.793303	6.24233e-05	2.3	0	0.884	0.442
1169	LG6(N4)	6		0.17	5	0.790805	0.793411	0.790805	0.793411	6.22056e-05	2.6	0	0.889	0.444
1170	LG6(N4)	7		0.2	5	0.790746	0.793506	0.790746	0.793506	6.20051e-05	2.9	0	0.902	0.451
1171	LG6(N4)	8		0.22	5	0.790698	0.793588	0.790698	0.793588	6.18288e-05	3.2	0	0.924	0.462
1172	LG6(N4)	9		0.24	5	0.790661	0.793656	0.790661	0.793656	6.16809e-05	3.4	0	0.955	0.478
1173	LG6(N4)	10		0.26	4	0.790634	0.79371	0.790634	0.79371	6.15637e-05	3.6	0	0.996	0.498
1174	LG6(N4)	10.098	CaiSSRD09J21-150	0.27	4	0.790632	0.793714	0.790632	0.793714	6.15539e-05	3.6	0	1	0.5
1175	LG6(N4)	11.098		0.25	5	0.790637	0.793713	0.790637	0.793713	6.15648e-05	3.6	0	0.96	0.48
1176	LG6(N4)	12.098		0.23	6	0.790649	0.793703	0.790649	0.793703	6.15988e-05	3.6	0	0.923	0.462
1177	LG6(N4)	13.098		0.22	6	0.790667	0.793682	0.790667	0.793682	6.16577e-05	3.5	0	0.889	0.445
1178	LG6(N4)	14.098		0.2	6	0.790693	0.79365	0.790693	0.79365	6.17428e-05	3.3	0	0.859	0.43
1179	LG6(N4)	15.098		0.18	7	0.790727	0.793606	0.790727	0.793606	6.18541e-05	3.2	0	0.832	0.416
1180	LG6(N4)	16.098		0.16	7	0.790769	0.793549	0.790769	0.793549	6.19916e-05	2.9	0	0.808	0.404
1181	LG6(N4)	17.098		0.14	8	0.79082	0.793478	0.79082	0.793478	6.21532e-05	2.7	0	0.787	0.394
1182	LG6(N4)	18.098		0.12	8	0.790882	0.793394	0.790882	0.793394	6.23366e-05	2.4	0	0.769	0.385
1183	LG6(N4)	19.098		0.1	8	0.790952	0.793295	0.790952	0.793295	6.2537e-05	2.1	0	0.755	0.377
1184	LG6(N4)	20.098		0.08	8	0.791033	0.793182	0.791033	0.793182	6.27484e-05	1.8	0	0.743	0.371
1185	LG6(N4)	21.098		0.07	8	0.791123	0.793057	0.791123	0.793057	6.29631e-05	1.4	0	0.734	0.367
1186	LG6(N4)	22.098		0.05	8	0.791222	0.792919	0.791222	0.792919	6.31721e-05	1.1	0	0.729	0.364
1187	LG6(N4)	23.098		0.04	8	0.791328	0.792772	0.791328	0.792772	6.33661e-05	0.8	0	0.726	0.363
1188	LG6(N4)	24.098		0.02	8	0.79144	0.792618	0.79144	0.792618	6.3536e-05	0.5	0	0.726	0.363
1189	LG6(N4)	25.098		0.01	8	0.791555	0.792461	0.791555	0.792461	6.36746e-05	0.3	0	0.729	0.365
1190	LG6(N4)	26.098		0.01	7	0.79167	0.792303	0.79167	0.792303	6.37774e-05	0.2	0	0.735	0.368
1191	LG6(N4)	27.098		0	7	0.791784	0.792149	0.791784	0.792149	6.38426e-05	0.1	0	0.745	0.372
1192	LG6(N4)	28.098		0	5	0.791894	0.792001	0.791894	0.792001	6.38723e-05	0	0	0.757	0.378
1193	LG6(N4)	29.098		0	5	0.791997	0.791862	0.791997	0.791862	6.38706e-05	0	0	0.772	0.386
1194	LG6(N4)	30.098		0	6	0.792094	0.791732	0.792094	0.791732	6.38431e-05	0.1	0	0.79	0.395
1195	LG6(N4)	31.098		0.01	6	0.792182	0.791614	0.792182	0.791614	6.37962e-05	0.1	0	0.811	0.406
1196	LG6(N4)	32.098		0.01	6	0.792261	0.791507	0.792261	0.791507	6.37361e-05	0.2	0	0.836	0.418
1197	LG6(N4)	33.098		0.02	6	0.792332	0.791412	0.792332	0.791412	6.36682e-05	0.3	0	0.863	0.432
1198	LG6(N4)	34.098		0.03	5	0.792394	0.791328	0.792394	0.791328	6.35973e-05	0.4	0	0.894	0.447
1199	LG6(N4)	35.098		0.04	5	0.792447	0.791254	0.792447	0.791254	6.35271e-05	0.5	0	0.928	0.464
1200	LG6(N4)	36.098		0.04	4	0.792493	0.79119	0.792493	0.79119	6.34603e-05	0.6	0	0.966	0.483
1201	LG6(N4)	36.951	LmSSRH3-4F	0.05	4	0.792526	0.791143	0.792526	0.791143	6.34076e-05	0.7	0	1	0.5
1202	LG6(N4)	37.951		0.05	4	0.792526	0.791143	0.792526	0.791143	6.34075e-05	0.7	0	0.991	0.495
1203	LG6(N4)	38.302	CaiSSRB01D08-140	0.05	4	0.792526	0.791143	0.792526	0.791143	6.34076e-05	0.7	0	1	0.5
1204	LG6(N4)	39.169	GAC-ctac-160	0	3	0.792	0.791867	0.792	0.791867	6.38707e-05	0	0	1	0.5
1205	LG6(N4)	40.169		0.02	6	0.792365	0.791378	0.792365	0.791378	6.36362e-05	0.4	0	0.959	0.479
1206	LG6(N4)	41.169		0.08	6	0.792698	0.790842	0.792698	0.790842	6.30424e-05	1.3	0	0.956	0.478
1207	LG6(N4)	42.169		0.14	5	0.792843	0.790557	0.792843	0.790557	6.26257e-05	2	0	0.991	0.495
1208	LG6(N4)	42.336	CaiSSRA03M16-160	0.14	4	0.79285	0.790538	0.79285	0.790538	6.25994e-05	2	0	1	0.5
1209	LG6(N4)	43.336		0.16	5	0.792906	0.790423	0.792906	0.790423	6.2409e-05	2.3	0	0.959	0.479
1210	LG6(N4)	44.336		0.17	5	0.792963	0.790303	0.792963	0.790303	6.22008e-05	2.6	0	0.923	0.461
1211	LG6(N4)	45.336		0.19	6	0.793018	0.79018	0.793018	0.79018	6.19773e-05	3	0	0.891	0.445
1212	LG6(N4)	46.336		0.21	6	0.793072	0.790056	0.793072	0.790056	6.17425e-05	3.3	0	0.864	0.432
1213	LG6(N4)	47.336		0.22	6	0.793123	0.789934	0.793123	0.789934	6.15017e-05	3.7	0	0.842	0.421
1214	LG6(N4)	48.336		0.24	7	0.79317	0.789815	0.79317	0.789815	6.12614e-05	4.1	0	0.824	0.412
1215	LG6(N4)	49.336		0.26	7	0.793211	0.789702	0.793211	0.789702	6.10293e-05	4.5	0	0.81	0.405
1216	LG6(N4)	50.336		0.28	7	0.793247	0.789598	0.793247	0.789598	6.08128e-05	4.8	0	0.802	0.401
1217	LG6(N4)	51.336		0.29	7	0.793277	0.789506	0.793277	0.789506	6.06188e-05	5.1	0	0.797	0.399
1218	LG6(N4)	52.336		0.31	7	0.793301	0.789426	0.793301	0.789426	6.04533e-05	5.4	0	0.797	0.399
1219	LG6(N4)	53.336		0.32	7	0.793317	0.78936	0.793317	0.78936	6.03208e-05	5.6	0	0.802	0.401
1220	LG6(N4)	54.336		0.34	7	0.793327	0.789309	0.793327	0.789309	6.02246e-05	5.7	0	0.811	0.406
1221	LG6(N4)	55.336		0.35	7	0.79333	0.789273	0.79333	0.789273	6.01666e-05	5.8	0	0.825	0.412
1222	LG6(N4)	56.336		0.36	7	0.793327	0.789253	0.793327	0.789253	6.01473e-05	5.8	0	0.843	0.421
1223	LG6(N4)	57.336		0.37	6	0.793317	0.789248	0.793317	0.789248	6.01663e-05	5.8	0	0.866	0.433
1224	LG6(N4)	58.336		0.37	6	0.793302	0.789258	0.793302	0.789258	6.02213e-05	5.7	0	0.893	0.447
1225	LG6(N4)	59.336		0.38	6	0.793281	0.789282	0.793281	0.789282	6.03096e-05	5.6	0	0.925	0.463
1226	LG6(N4)	60.336		0.38	5	0.793255	0.789319	0.793255	0.789319	6.04271e-05	5.4	0	0.962	0.481
1227	LG6(N4)	61.265	GTC-cgcc-190	0.38	4	0.793227	0.789364	0.793227	0.789364	6.05579e-05	5.2	0	1	0.5
1228	LG6(N4)	61.841	GCG-cgcc	0.38	4	0.793227	0.789364	0.793227	0.789364	6.05579e-05	5.2	0	1	0.5
1229	LG6(N4)	62.841		0.35	6	0.793275	0.789384	0.793275	0.789384	6.04638e-05	5.3	0	0.962	0.481
1230	LG6(N4)	63.841		0.31	7	0.793283	0.78947	0.793283	0.78947	6.05561e-05	5.2	0	0.932	0.466
1231	LG6(N4)	64.841		0.26	8	0.79325	0.789625	0.79325	0.789625	6.08425e-05	4.7	0	0.909	0.455
1232	LG6(N4)	65.841		0.2	8	0.793171	0.789852	0.793171	0.789852	6.13045e-05	4	0	0.894	0.447
1233	LG6(N4)	66.841		0.15	8	0.793045	0.790146	0.793045	0.790146	6.1892e-05	3.1	0	0.886	0.443
1234	LG6(N4)	67.841		0.1	8	0.792876	0.790491	0.792876	0.790491	6.25185e-05	2.1	0	0.885	0.442
1235	LG6(N4)	68.841		0.06	8	0.792676	0.790858	0.792676	0.790858	6.3078e-05	1.2	0	0.891	0.446
1236	LG6(N4)	69.841		0.03	7	0.792464	0.791208	0.792464	0.791208	6.34912e-05	0.6	0	0.905	0.453
1237	LG6(N4)	70.841		0.01	6	0.79226	0.791515	0.79226	0.791515	6.37391e-05	0.2	0	0.927	0.463
1238	LG6(N4)	71.841		0	5	0.792076	0.791767	0.792076	0.791767	6.38517e-05	0	0	0.956	0.478
1239	LG6(N4)	72.841		0	3	0.791917	0.791966	0.791917	0.791966	6.38745e-05	0	0	0.992	0.496
1240	LG6(N4)	73.042	ATC-cggt140	0	3	0.791889	0.792	0.791889	0.792	6.38721e-05	0	0	1	0.5
1241	LG6(N4)	74.042		0	4	0.791753	0.792147	0.791753	0.792147	6.38364e-05	0.1	0	0.969	0.484
1242	LG6(N4)	75.042		0.01	4	0.791603	0.792287	0.791603	0.792287	6.37584e-05	0.2	0	0.953	0.477
1243	LG6(N4)	76.042		0.03	4	0.791446	0.792413	0.791446	0.792413	6.36414e-05	0.4	0	0.953	0.477
1244	LG6(N4)	77.042		0.04	4	0.791286	0.792522	0.791286	0.792522	6.34946e-05	0.6	0	0.969	0.485
1245	LG6(N4)	78.026	ATA-cctt350	0.06	4	0.791133	0.792611	0.791133	0.792611	6.33337e-05	0.8	0	1	0.5
1246	LG6(N4)	79.026		0.06	4	0.791133	0.792611	0.791133	0.792611	6.33333e-05	0.8	0	0.978	0.489
1247	LG6(N4)	80.026		0.06	4	0.791133	0.792611	0.791133	0.792611	6.33334e-05	0.8	0	0.982	0.491
1248	LG6(N4)	80.716	ATA-cgaa120	0.06	4	0.791133	0.792611	0.791133	0.792611	6.33337e-05	0.8	0	1	0.5
1249	LG6(N4)	81.716		0.06	4	0.791133	0.792611	0.791133	0.792611	6.33336e-05	0.8	0	0.991	0.496
1250	LG6(N4)	82.053	CaiSSRB04O03-270	0.06	4	0.791133	0.792611	0.791133	0.792611	6.33337e-05	0.8	0	1	0.5
1251	LG6(N4)	83.053		0.06	4	0.791133	0.792611	0.791133	0.792611	6.33336e-05	0.8	0	0.991	0.496
1252	LG6(N4)	83.362	CaiSSRB04O03-280	0.06	4	0.791133	0.792611	0.791133	0.792611	6.33337e-05	0.8	0	1	0.5
1253	LG6(N4)	84.362		0.06	4	0.791132	0.792616	0.791132	0.792616	6.33289e-05	0.9	0	0.965	0.483
1254	LG6(N4)	85.362		0.06	5	0.791138	0.792616	0.791138	0.792616	6.33326e-05	0.8	0	0.938	0.469
1255	LG6(N4)	86.362		0.05	5	0.79115	0.792611	0.79115	0.792611	6.33454e-05	0.8	0	0.917	0.459
1256	LG6(N4)	87.362		0.05	5	0.79117	0.7926	0.79117	0.7926	6.33669e-05	0.8	0	0.904	0.452
1257	LG6(N4)	88.362		0.05	5	0.791197	0.792584	0.791197	0.792584	6.33963e-05	0.7	0	0.897	0.449
1258	LG6(N4)	89.362		0.04	5	0.791229	0.792563	0.791229	0.792563	6.34321e-05	0.7	0	0.898	0.449
1259	LG6(N4)	90.362		0.04	5	0.791267	0.792538	0.791267	0.792538	6.34726e-05	0.6	0	0.905	0.453
1260	LG6(N4)	91.362		0.04	5	0.791308	0.792509	0.791308	0.792509	6.35158e-05	0.6	0	0.92	0.46
1261	LG6(N4)	92.362		0.03	5	0.791352	0.792477	0.791352	0.792477	6.35598e-05	0.5	0	0.941	0.471
1262	LG6(N4)	93.362		0.03	4	0.791398	0.792442	0.791398	0.792442	6.36029e-05	0.4	0	0.97	0.485
1263	LG6(N4)	94.22	AGG-cgtt420	0.03	4	0.791438	0.792412	0.791438	0.792412	6.3638e-05	0.4	0	1	0.5
1264	LG6(N4)	95.22		0.05	5	0.791297	0.792666	0.791297	0.792666	6.34084e-05	0.7	0	0.966	0.483
1265	LG6(N4)	95.542	LmSSR1-9G-200	0.05	4	0.791333	0.792667	0.791333	0.792667	6.34343e-05	0.7	0	1	0.5
1266	LG6(N4)	96.542		0.01	4	0.79163	0.792292	0.79163	0.792292	6.3766e-05	0.2	0	0.965	0.482
1267	LG6(N4)	97.542		0	3	0.791993	0.791882	0.791993	0.791882	6.3872e-05	0	0	0.989	0.494
1268	LG6(N4)	97.735	GTC-ccac-210	0	3	0.792059	0.791813	0.792059	0.791813	6.386e-05	0	0	1	0.5
1269	LG6(N4)	98.051	GGT-cttt-150	0.03	4	0.791437	0.792412	0.791437	0.792412	6.3638e-05	0.4	0	1	0.5
1270	LG6(N4)	99.051		0.03	4	0.791437	0.792412	0.791437	0.792412	6.3638e-05	0.4	0	0.992	0.496
1271	LG6(N4)	99.309	LmSSR7-6H-180*	0.03	4	0.791438	0.792412	0.791438	0.792412	6.3638e-05	0.4	0	1	0.5
1272	LG6(N4)	100.309		0.03	4	0.791366	0.792466	0.791366	0.792466	6.35729e-05	0.5	0	0.97	0.485
1273	LG6(N4)	101.309		0.04	4	0.791294	0.792518	0.791294	0.792518	6.35013e-05	0.6	0	0.954	0.477
1274	LG6(N4)	102.309		0.05	4	0.791222	0.792567	0.791222	0.792567	6.34249e-05	0.7	0	0.952	0.476
1275	LG6(N4)	103.309		0.06	4	0.791153	0.792613	0.791153	0.792613	6.33453e-05	0.8	0	0.964	0.482
1276	LG6(N4)	104.309		0.07	4	0.791086	0.792655	0.791086	0.792655	6.32643e-05	1	0	0.99	0.495
1277	LG6(N4)	104.603	LmSSR2-5G-270	0.07	4	0.791067	0.792667	0.791067	0.792667	6.32404e-05	1	0	1	0.5
1278	LG6(N4)	105.208	AGG-cgtt140	0	4	0.79175	0.792118	0.79175	0.792118	6.38414e-05	0.1	0	1	0.5
1279	LG6(N4)	106.208		0	4	0.791784	0.792081	0.791784	0.792081	6.38531e-05	0	0	0.955	0.478
1280	LG6(N4)	107.208		0	4	0.791824	0.792041	0.791824	0.792041	6.38634e-05	0	0	0.919	0.459
1281	LG6(N4)	108.208		0	4	0.791869	0.791999	0.791869	0.791999	6.38709e-05	0	0	0.892	0.446
1282	LG6(N4)	109.208		0	4	0.791919	0.791956	0.791919	0.791956	6.38748e-05	0	0	0.873	0.436
1283	LG6(N4)	110.208		0	4	0.791972	0.791913	0.791972	0.791913	6.38742e-05	0	0	0.863	0.431
1284	LG6(N4)	111.208		0	4	0.792028	0.79187	0.792028	0.79187	6.3869e-05	0	0	0.862	0.431
1285	LG6(N4)	112.208		0	4	0.792085	0.79183	0.792085	0.79183	6.38592e-05	0	0	0.869	0.434
1286	LG6(N4)	113.208		0	4	0.792141	0.791793	0.792141	0.791793	6.38455e-05	0	0	0.885	0.442
1287	LG6(N4)	114.208		0	4	0.792196	0.791759	0.792196	0.791759	6.38289e-05	0.1	0	0.909	0.455
1288	LG6(N4)	115.208		0.01	4	0.792247	0.79173	0.792247	0.79173	6.38108e-05	0.1	0	0.943	0.471
1289	LG6(N4)	116.208		0.01	4	0.792294	0.791706	0.792294	0.791706	6.37925e-05	0.1	0	0.985	0.492
1290	LG6(N4)	116.521	LmSSR17-8D-700	0.01	4	0.792308	0.7917	0.792308	0.7917	6.37869e-05	0.1	0	1	0.5
1291	LG6(N4)	117.521		0	4	0.79219	0.791772	0.79219	0.791772	6.38331e-05	0.1	0	0.938	0.469
1292	LG6(N4)	118.521		0	4	0.79206	0.791857	0.79206	0.791857	6.38651e-05	0	0	0.884	0.442
1293	LG6(N4)	119.521		0	4	0.791918	0.791954	0.791918	0.791954	6.38748e-05	0	0	0.836	0.418
1294	LG6(N4)	120.521		0	5	0.791765	0.792065	0.791765	0.792065	6.38532e-05	0	0	0.794	0.397
1295	LG6(N4)	121.521		0.01	6	0.791602	0.792189	0.791602	0.792189	6.37911e-05	0.1	0	0.759	0.38
1296	LG6(N4)	122.521		0.02	6	0.791433	0.792323	0.791433	0.792323	6.3681e-05	0.3	0	0.731	0.366
1297	LG6(N4)	123.521		0.03	7	0.791262	0.792466	0.791262	0.792466	6.3518e-05	0.6	0	0.709	0.355
1298	LG6(N4)	124.521		0.04	7	0.791092	0.792614	0.791092	0.792614	6.33036e-05	0.9	0	0.694	0.347
1299	LG6(N4)	125.521		0.06	8	0.79093	0.792763	0.79093	0.792763	6.3044e-05	1.3	0	0.685	0.342
1300	LG6(N4)	126.521		0.09	8	0.79078	0.792908	0.79078	0.792908	6.27523e-05	1.8	0	0.682	0.341
1301	LG6(N4)	127.521		0.11	8	0.790645	0.793045	0.790645	0.793045	6.2444e-05	2.2	0	0.686	0.343
1302	LG6(N4)	128.521		0.14	8	0.790529	0.793173	0.790529	0.793173	6.21354e-05	2.7	0	0.696	0.348
1303	LG6(N4)	129.521		0.17	7	0.790432	0.793289	0.790432	0.793289	6.18419e-05	3.2	0	0.713	0.356
1304	LG6(N4)	130.521		0.2	7	0.790355	0.793391	0.790355	0.793391	6.15743e-05	3.6	0	0.736	0.368
1305	LG6(N4)	131.521		0.23	7	0.790296	0.793481	0.790296	0.793481	6.13414e-05	4	0	0.765	0.383
1306	LG6(N4)	132.521		0.26	6	0.790255	0.793558	0.790255	0.793558	6.11485e-05	4.3	0	0.801	0.401
1307	LG6(N4)	133.521		0.28	6	0.790231	0.793624	0.790231	0.793624	6.09972e-05	4.5	0	0.844	0.422
1308	LG6(N4)	134.521		0.31	6	0.790221	0.793678	0.790221	0.793678	6.08877e-05	4.7	0	0.893	0.446
1309	LG6(N4)	135.521		0.34	5	0.790224	0.793721	0.790224	0.793721	6.08185e-05	4.8	0	0.949	0.474
1310	LG6(N4)	136.344	GCG-cgcg-290	0.35	4	0.790235	0.79375	0.790235	0.79375	6.07897e-05	4.8	0	1	0.5
1311	LG6(N4)	137.2	LmSSRPere1	0.35	4	0.790235	0.79375	0.790235	0.79375	6.07897e-05	4.8	0	1	0.5
1312	LG6(N4)	138.2		0.4	5	0.790115	0.793925	0.790115	0.793925	6.02517e-05	5.7	0	0.962	0.481
1313	LG6(N4)	139.2		0.45	5	0.79001	0.794083	0.79001	0.794083	5.97397e-05	6.5	0	0.933	0.467
1314	LG6(N4)	140.2		0.49	6	0.789924	0.794219	0.789924	0.794219	5.92812e-05	7.2	0	0.913	0.457
1315	LG6(N4)	141.2		0.53	6	0.789855	0.794332	0.789855	0.794332	5.88883e-05	7.8	0	0.902	0.451
1316	LG6(N4)	142.2		0.57	6	0.7898	0.794423	0.7898	0.794423	5.85605e-05	8.3	0	0.899	0.449
1317	LG6(N4)	143.2		0.61	5	0.789757	0.794498	0.789757	0.794498	5.82913e-05	8.7	0	0.905	0.452
1318	LG6(N4)	144.2		0.65	5	0.789723	0.794558	0.789723	0.794558	5.8072e-05	9.1	0	0.919	0.46
1319	LG6(N4)	145.2		0.68	5	0.789697	0.794607	0.789697	0.794607	5.78946e-05	9.4	0	0.943	0.471
1320	LG6(N4)	146.2		0.71	5	0.789677	0.794646	0.789677	0.794646	5.77521e-05	9.6	0	0.975	0.487
1321	LG6(N4)	146.839	ATG-cgat250	0.73	4	0.789667	0.794667	0.789667	0.794667	5.76768e-05	9.7	0	1	0.5
1322	LG7(N4)	0	GAA-ctaa-250	0	3	0.792	0.791867	0.792	0.791867	6.38707e-05	0	0	1	0.5
1323	LG7(N4)	0	ATC-caac-290	0	3	0.792	0.791867	0.792	0.791867	6.38707e-05	0	0	1	0.5
1324	LG7(N4)	1		0.01	4	0.791712	0.792226	0.791712	0.792226	6.38099e-05	0.1	0	0.967	0.484
1325	LG7(N4)	2		0.03	5	0.791436	0.792602	0.791436	0.792602	6.35412e-05	0.5	0	0.97	0.485
1326	LG7(N4)	2.837	AAC-ccgt330	0.07	4	0.791263	0.792857	0.791263	0.792857	6.32545e-05	1	0	1	0.5
1327	LG7(N4)	3.837		0.06	4	0.791318	0.792787	0.791318	0.792787	6.33482e-05	0.8	0	0.95	0.475
1328	LG7(N4)	4.837		0.05	4	0.791381	0.792701	0.791381	0.792701	6.34496e-05	0.7	0	0.943	0.472
1329	LG7(N4)	5.837		0.04	4	0.791451	0.792603	0.791451	0.792603	6.3551e-05	0.5	0	0.98	0.49
1330	LG7(N4)	6.144	GGG-cttg	0.03	4	0.791474	0.792571	0.791474	0.792571	6.35808e-05	0.5	0	1	0.5
1331	LG7(N4)	7.144		0.04	4	0.791456	0.792585	0.791456	0.792585	6.35627e-05	0.5	0	0.967	0.483
1332	LG7(N4)	8.144		0.04	4	0.791438	0.792599	0.791438	0.792599	6.35443e-05	0.5	0	0.943	0.472
1333	LG7(N4)	9.144		0.04	4	0.79142	0.792611	0.79142	0.792611	6.35259e-05	0.5	0	0.929	0.464
1334	LG7(N4)	10.144		0.04	4	0.791402	0.792624	0.791402	0.792624	6.35073e-05	0.6	0	0.924	0.462
1335	LG7(N4)	11.144		0.04	4	0.791384	0.792635	0.791384	0.792635	6.34887e-05	0.6	0	0.929	0.465
1336	LG7(N4)	12.144		0.05	4	0.791367	0.792647	0.791367	0.792647	6.34702e-05	0.6	0	0.944	0.472
1337	LG7(N4)	13.144		0.05	4	0.79135	0.792657	0.79135	0.792657	6.34518e-05	0.7	0	0.968	0.484
1338	LG7(N4)	14.107	LmSSR10-7A	0.05	4	0.791333	0.792667	0.791333	0.792667	6.34343e-05	0.7	0	1	0.5
1339	LG7(N4)	15.107		0.12	4	0.790951	0.79303	0.790951	0.79303	6.27971e-05	1.7	0	0.978	0.489
1340	LG7(N4)	15.729	GTT-cgag-210	0.17	4	0.790765	0.793187	0.790765	0.793187	6.2409e-05	2.3	0	1	0.5
1341	LG7(N4)	15.729	GTT-cgag-220	0.17	4	0.790765	0.793187	0.790765	0.793187	6.2409e-05	2.3	0	1	0.5
1342	LG7(N4)	16.729		0.06	4	0.791237	0.792757	0.791237	0.792757	6.3301e-05	0.9	0	0.992	0.496
1343	LG7(N4)	16.997	AAT-cgct410	0.04	4	0.791389	0.7926	0.791389	0.7926	6.35114e-05	0.6	0	1	0.5
1344	LG7(N4)	17.566	ATA-cctt130	0.04	4	0.791389	0.7926	0.791389	0.7926	6.35114e-05	0.6	0	1	0.5
1345	LG7(N4)	18.566		0.04	4	0.791389	0.7926	0.791389	0.7926	6.35114e-05	0.6	0	0.992	0.496
1346	LG7(N4)	18.873	LmSSR18-5D*	0.04	4	0.791389	0.7926	0.791389	0.7926	6.35114e-05	0.6	0	1	0.5
1347	LG7(N4)	19.873		0.04	4	0.7914	0.792554	0.7914	0.792554	6.35436e-05	0.5	0	0.967	0.483
1348	LG7(N4)	20.873		0.03	5	0.791427	0.792494	0.791427	0.792494	6.35911e-05	0.4	0	0.952	0.476
1349	LG7(N4)	21.873		0.02	4	0.791469	0.792422	0.791469	0.792422	6.36485e-05	0.4	0	0.956	0.478
1350	LG7(N4)	22.873		0.02	4	0.791525	0.792343	0.791525	0.792343	6.3708e-05	0.3	0	0.978	0.489
1351	LG7(N4)	23.477	ATG-ctag-160	0.02	4	0.791563	0.792294	0.791563	0.792294	6.37414e-05	0.2	0	1	0.5
1352	LG7(N4)	24.477		0.05	4	0.791237	0.792647	0.791237	0.792647	6.33779e-05	0.8	0	0.965	0.482
1353	LG7(N4)	25.443	TAG-cctg-150	0.11	4	0.791	0.792938	0.791	0.792938	6.29375e-05	1.5	0	1	0.5
1354	LG7(N4)	26.443		0.08	4	0.791099	0.792817	0.791099	0.792817	6.31376e-05	1.2	0	0.956	0.478
1355	LG7(N4)	27.443		0.05	5	0.791222	0.792673	0.791222	0.792673	6.33487e-05	0.8	0	0.932	0.466
1356	LG7(N4)	28.443		0.03	5	0.791369	0.79251	0.791369	0.79251	6.35498e-05	0.5	0	0.929	0.464
1357	LG7(N4)	29.443		0.02	4	0.791532	0.792336	0.791532	0.792336	6.37138e-05	0.3	0	0.946	0.473
1358	LG7(N4)	30.443		0.01	4	0.7917	0.792166	0.7917	0.792166	6.38208e-05	0.1	0	0.984	0.492
1359	LG7(N4)	30.759	TAA-ctga-200	0	4	0.791752	0.792116	0.791752	0.792116	6.3842e-05	0.1	0	1	0.5
1360	LG7(N4)	31.759		0.01	4	0.791593	0.792273	0.791593	0.792273	6.37597e-05	0.2	0	0.95	0.475
1361	LG7(N4)	32.759		0.03	5	0.791428	0.792445	0.791428	0.792445	6.36162e-05	0.4	0	0.91	0.455
1362	LG7(N4)	33.759		0.05	5	0.791259	0.792629	0.791259	0.792629	6.34059e-05	0.7	0	0.881	0.44
1363	LG7(N4)	34.759		0.07	5	0.791094	0.792819	0.791094	0.792819	6.31315e-05	1.2	0	0.861	0.43
1364	LG7(N4)	35.759		0.1	6	0.790938	0.793009	0.790938	0.793009	6.28048e-05	1.7	0	0.851	0.426
1365	LG7(N4)	36.759		0.14	6	0.790796	0.79319	0.790796	0.79319	6.24453e-05	2.2	0	0.851	0.426
1366	LG7(N4)	37.759		0.18	6	0.79067	0.793359	0.79067	0.793359	6.20739e-05	2.8	0	0.862	0.431
1367	LG7(N4)	38.759		0.22	5	0.790562	0.793512	0.790562	0.793512	6.17092e-05	3.4	0	0.882	0.441
1368	LG7(N4)	39.759		0.27	5	0.79047	0.793648	0.79047	0.793648	6.13647e-05	3.9	0	0.912	0.456
1369	LG7(N4)	40.759		0.31	5	0.790394	0.793768	0.790394	0.793768	6.10489e-05	4.4	0	0.952	0.476
1370	LG7(N4)	41.707	TAT-ctat-390	0.36	4	0.790333	0.793867	0.790333	0.793867	6.07798e-05	4.8	0	1	0.5
1371	LG7(N4)	42.707		0.46	5	0.789993	0.794116	0.789993	0.794116	5.96384e-05	6.6	0	0.93	0.465
1372	LG7(N4)	43.544	GTC-cgct-260	0.49	4	0.789941	0.794063	0.789941	0.794063	5.96327e-05	6.6	0	1	0.5
1373	LG7(N4)	44.544		0.48	5	0.789895	0.794037	0.789895	0.794037	5.95867e-05	6.7	0	0.958	0.479
1374	LG7(N4)	45.544		0.45	5	0.789874	0.793983	0.789874	0.793983	5.96545e-05	6.6	0	0.934	0.467
1375	LG7(N4)	46.544		0.42	6	0.789889	0.793893	0.789889	0.793893	5.98695e-05	6.3	0	0.927	0.464
1376	LG7(N4)	47.544		0.38	6	0.789952	0.793754	0.789952	0.793754	6.02676e-05	5.6	0	0.939	0.469
1377	LG7(N4)	48.544		0.33	5	0.790075	0.793558	0.790075	0.793558	6.08563e-05	4.7	0	0.968	0.484
1378	LG7(N4)	49.257	TTA-ccga-100	0.29	4	0.7902	0.793389	0.7902	0.793389	6.13539e-05	3.9	0	1	0.5
1379	LG7(N4)	50.257		0.3	5	0.790163	0.793508	0.790163	0.793508	6.10888e-05	4.4	0	0.94	0.47
1380	LG7(N4)	51.257		0.3	6	0.790141	0.79362	0.790141	0.79362	6.08531e-05	4.7	0	0.891	0.445
1381	LG7(N4)	52.257		0.3	7	0.790136	0.793719	0.790136	0.793719	6.06655e-05	5	0	0.851	0.425
1382	LG7(N4)	53.257		0.3	7	0.79015	0.793802	0.79015	0.793802	6.05424e-05	5.2	0	0.821	0.41
1383	LG7(N4)	54.257		0.3	7	0.790184	0.793865	0.790184	0.793865	6.04949e-05	5.3	0	0.801	0.4
1384	LG7(N4)	55.257		0.29	7	0.790238	0.793907	0.790238	0.793907	6.05286e-05	5.2	0	0.79	0.395
1385	LG7(N4)	56.257		0.28	7	0.790311	0.793925	0.790311	0.793925	6.06424e-05	5.1	0	0.79	0.395
1386	LG7(N4)	57.257		0.27	7	0.790401	0.793919	0.790401	0.793919	6.08293e-05	4.8	0	0.799	0.399
1387	LG7(N4)	58.257		0.25	7	0.790505	0.793891	0.790505	0.793891	6.10764e-05	4.4	0	0.818	0.409
1388	LG7(N4)	59.257		0.24	6	0.79062	0.793841	0.79062	0.793841	6.13663e-05	3.9	0	0.846	0.423
1389	LG7(N4)	60.257		0.22	6	0.790741	0.793773	0.790741	0.793773	6.16783e-05	3.4	0	0.885	0.442
1390	LG7(N4)	61.257		0.2	5	0.790864	0.79369	0.790864	0.79369	6.1993e-05	2.9	0	0.933	0.467
1391	LG7(N4)	62.257		0.18	4	0.790985	0.793596	0.790985	0.793596	6.22935e-05	2.5	0	0.992	0.496
1392	LG7(N4)	62.387	GTC-ccac-190	0.18	4	0.791	0.793583	0.791	0.793583	6.23308e-05	2.4	0	1	0.5
1393	LG7(N4)	63.387		0.18	5	0.79096	0.793619	0.79096	0.793619	6.22294e-05	2.6	0	0.966	0.483
1394	LG7(N4)	64.387		0.18	5	0.790928	0.793643	0.790928	0.793643	6.21518e-05	2.7	0	0.94	0.47
1395	LG7(N4)	65.387		0.19	5	0.790904	0.793653	0.790904	0.793653	6.21013e-05	2.8	0	0.922	0.461
1396	LG7(N4)	66.387		0.19	5	0.79089	0.793651	0.79089	0.793651	6.20791e-05	2.8	0	0.913	0.456
1397	LG7(N4)	67.387		0.19	5	0.790885	0.793637	0.790885	0.793637	6.20845e-05	2.8	0	0.911	0.455
1398	LG7(N4)	68.387		0.19	5	0.790888	0.793613	0.790888	0.793613	6.21153e-05	2.8	0	0.917	0.458
1399	LG7(N4)	69.387		0.18	5	0.790898	0.793578	0.790898	0.793578	6.21685e-05	2.7	0	0.931	0.466
1400	LG7(N4)	70.387		0.18	5	0.790915	0.793536	0.790915	0.793536	6.22401e-05	2.6	0	0.953	0.477
1401	LG7(N4)	71.387		0.17	4	0.790938	0.793486	0.790938	0.793486	6.23261e-05	2.4	0	0.983	0.492
1402	LG7(N4)	71.844	LmSSR10-10D-140	0.17	4	0.79095	0.793462	0.79095	0.793462	6.23691e-05	2.4	0	1	0.5
1403	LG7(N4)	71.844	GAG-cacc-220	0.17	4	0.79095	0.793462	0.79095	0.793462	6.23691e-05	2.4	0	1	0.5
1404	LG7(N4)	71.844	GAG-cacc-230	0.17	4	0.79095	0.793462	0.79095	0.793462	6.23691e-05	2.4	0	1	0.5
1405	LG7(N4)	72.844		0.2	4	0.790891	0.793602	0.790891	0.793602	6.21313e-05	2.7	0	0.969	0.485
1406	LG7(N4)	73.844		0.22	4	0.790838	0.793735	0.790838	0.793735	6.18967e-05	3.1	0	0.954	0.477
1407	LG7(N4)	74.844		0.25	5	0.790792	0.793858	0.790792	0.793858	6.16734e-05	3.4	0	0.952	0.476
1408	LG7(N4)	75.844		0.27	4	0.790753	0.793968	0.790753	0.793968	6.14673e-05	3.8	0	0.965	0.483
1409	LG7(N4)	76.844		0.3	4	0.79072	0.794066	0.79072	0.794066	6.12817e-05	4.1	0	0.993	0.497
1410	LG7(N4)	77.036	GAG-ctag-200	0.3	4	0.790714	0.794083	0.790714	0.794083	6.12486e-05	4.1	0	1	0.5

## Sheet: FVFM10
Nr	Group	Position	Locus	LOD	# Iter.	mu_ac{00}	mu_ad{00}	mu_bc{00}	mu_bd{00}	Variance	% Expl.	GIC_1	GIC_2	GIC_m
1	LG1(K7)	0	TAT-ccaa-150	0.04	4	0.760923	0.760923	0.7625	0.7625	0.000111452	0.5	1	0	0.5
2	LG1(K7)	1		0.04	4	0.760881	0.760881	0.762537	0.762537	0.00011139	0.6	0.963	0	0.482
3	LG1(K7)	2		0.05	4	0.76084	0.76084	0.762573	0.762573	0.000111325	0.6	0.934	0	0.467
4	LG1(K7)	3		0.05	4	0.760801	0.760801	0.76261	0.76261	0.000111258	0.7	0.914	0	0.457
5	LG1(K7)	4		0.05	4	0.760763	0.760763	0.762645	0.762645	0.00011119	0.8	0.902	0	0.451
6	LG1(K7)	5		0.06	4	0.760727	0.760727	0.762681	0.762681	0.000111122	0.8	0.898	0	0.449
7	LG1(K7)	6		0.06	4	0.760692	0.760692	0.762715	0.762715	0.000111053	0.9	0.902	0	0.451
8	LG1(K7)	7		0.07	4	0.760659	0.760659	0.762749	0.762749	0.000110984	0.9	0.915	0	0.458
9	LG1(K7)	8		0.07	4	0.760627	0.760627	0.762782	0.762782	0.000110915	1	0.936	0	0.468
10	LG1(K7)	9		0.08	4	0.760597	0.760597	0.762814	0.762814	0.000110848	1.1	0.965	0	0.483
11	LG1(K7)	9.931	LmSSR16-6G-230	0.08	4	0.760571	0.760571	0.762842	0.762842	0.000110787	1.1	1	0	0.5
12	LG1(K7)	10.931		0.06	4	0.760696	0.760696	0.762738	0.762738	0.00011103	0.9	0.96	0	0.48
13	LG1(K7)	11.931		0.05	4	0.76083	0.76083	0.76263	0.76263	0.000111259	0.7	0.93	0	0.465
14	LG1(K7)	12.931		0.04	4	0.760974	0.760974	0.762518	0.762518	0.000111468	0.5	0.911	0	0.455
15	LG1(K7)	13.931		0.02	4	0.761125	0.761125	0.762404	0.762404	0.00011165	0.4	0.901	0	0.45
16	LG1(K7)	14.931		0.02	4	0.761283	0.761283	0.762288	0.762288	0.000111802	0.2	0.901	0	0.451
17	LG1(K7)	15.931		0.01	4	0.761445	0.761445	0.762173	0.762173	0.000111918	0.1	0.912	0	0.456
18	LG1(K7)	16.931		0	4	0.761608	0.761608	0.762059	0.762059	0.000111997	0	0.932	0	0.466
19	LG1(K7)	17.931		0	3	0.761773	0.761773	0.761949	0.761949	0.000112038	0	0.963	0	0.481
20	LG1(K7)	18.855	GTC-cttg-170	0	3	0.761923	0.761923	0.76185	0.76185	0.000112045	0	1	0	0.5
21	LG1(K7)	19.855		0	3	0.761935	0.761935	0.761843	0.761843	0.000112044	0	0.955	0	0.477
22	LG1(K7)	20.855		0	3	0.761946	0.761946	0.761837	0.761837	0.000112043	0	0.926	0	0.463
23	LG1(K7)	21.855		0	3	0.761958	0.761958	0.76183	0.76183	0.000112042	0	0.915	0	0.458
24	LG1(K7)	22.855		0	3	0.761971	0.761971	0.761824	0.761824	0.000112041	0	0.921	0	0.461
25	LG1(K7)	23.855		0	3	0.761983	0.761983	0.761817	0.761817	0.00011204	0	0.944	0	0.472
26	LG1(K7)	24.855		0	3	0.761996	0.761996	0.761811	0.761811	0.000112038	0	0.984	0	0.492
27	LG1(K7)	25.16	CaiSSRB01A19-150	0	3	0.762	0.762	0.76181	0.76181	0.000112038	0	1	0	0.5
28	LG1(K7)	26.16		0	3	0.762	0.762	0.76181	0.76181	0.000112038	0	0.982	0	0.491
29	LG1(K7)	26.505	ATC-caac-280	0	3	0.762	0.762	0.76181	0.76181	0.000112038	0	1	0	0.5
30	LG1(K7)	27.505		0	3	0.761999	0.761999	0.761809	0.761809	0.000112037	0	0.965	0	0.482
31	LG1(K7)	28.505		0	3	0.761998	0.761998	0.761808	0.761808	0.000112037	0	0.936	0	0.468
32	LG1(K7)	29.505		0	3	0.761997	0.761997	0.761807	0.761807	0.000112037	0	0.914	0	0.457
33	LG1(K7)	30.505		0	3	0.761996	0.761996	0.761806	0.761806	0.000112037	0	0.897	0	0.449
34	LG1(K7)	31.505		0	3	0.761995	0.761995	0.761806	0.761806	0.000112037	0	0.887	0	0.443
35	LG1(K7)	32.505		0	3	0.761994	0.761994	0.761805	0.761805	0.000112037	0	0.883	0	0.441
36	LG1(K7)	33.505		0	3	0.761992	0.761992	0.761804	0.761804	0.000112037	0	0.885	0	0.442
37	LG1(K7)	34.505		0	3	0.761991	0.761991	0.761804	0.761804	0.000112037	0	0.893	0	0.446
38	LG1(K7)	35.505		0	3	0.76199	0.76199	0.761803	0.761803	0.000112038	0	0.907	0	0.453
39	LG1(K7)	36.505		0	3	0.761988	0.761988	0.761803	0.761803	0.000112038	0	0.927	0	0.464
40	LG1(K7)	37.505		0	3	0.761987	0.761987	0.761803	0.761803	0.000112038	0	0.954	0	0.477
41	LG1(K7)	38.505		0	3	0.761986	0.761986	0.761802	0.761802	0.000112038	0	0.986	0	0.493
42	LG1(K7)	38.68	GCT-cgct-120	0	3	0.761985	0.761985	0.761802	0.761802	0.000112038	0	0.993	0	0.496
43	LG1(K7)	39.68		0.01	5	0.762227	0.762227	0.761615	0.761615	0.000111954	0.1	0.953	0	0.476
44	LG1(K7)	40.68		0.01	5	0.762434	0.762434	0.761435	0.761435	0.000111799	0.2	0.955	0	0.477
45	LG1(K7)	41.68		0.02	4	0.762533	0.762533	0.761334	0.761334	0.000111689	0.3	1	0	0.5
46	LG1(K7)	41.686	GTT-caat-170	0.02	4	0.762533	0.762533	0.761333	0.761333	0.000111689	0.3	1	0	0.5
47	LG1(K7)	42.686		0	4	0.761815	0.761815	0.761932	0.761932	0.000112042	0	0.938	0	0.469
48	LG1(K7)	43.686		0.04	5	0.760998	0.760998	0.762611	0.762611	0.000111401	0.6	0.935	0	0.468
49	LG1(K7)	44.686		0.12	4	0.76038	0.76038	0.763128	0.763128	0.000110174	1.7	0.992	0	0.496
50	LG1(K7)	44.782	GTT-cgag-400	0.13	4	0.760333	0.760333	0.763167	0.763167	0.000110056	1.8	1	0	0.5
51	LG1(K7)	45.782		0.21	6	0.759834	0.759834	0.763753	0.763753	0.000108214	3.4	0.964	0	0.482
52	LG1(K7)	46.782		0.33	8	0.759335	0.759335	0.764458	0.764458	0.000105486	5.9	0.937	0	0.469
53	LG1(K7)	47.782		0.47	8	0.758935	0.758935	0.765157	0.765157	0.000102395	8.6	0.92	0	0.46
54	LG1(K7)	48.782		0.62	8	0.758683	0.758683	0.765727	0.765727	9.97464e-05	11	0.912	0	0.456
55	LG1(K7)	49.782		0.76	7	0.758551	0.758551	0.76615	0.76615	9.78318e-05	12.7	0.914	0	0.457
56	LG1(K7)	50.782		0.89	7	0.758496	0.758496	0.766463	0.766463	9.65394e-05	13.8	0.925	0	0.462
57	LG1(K7)	51.782		1.01	6	0.758491	0.758491	0.766702	0.766702	9.57022e-05	14.6	0.945	0	0.473
58	LG1(K7)	52.782		1.12	5	0.758518	0.758518	0.766893	0.766893	9.51942e-05	15	0.975	0	0.488
59	LG1(K7)	53.44	TAG-ctgg-300	1.18	4	0.75855	0.75855	0.767	0.767	9.49985e-05	15.2	1	0	0.5
60	LG1(K7)	54.44		1.68	6	0.757694	0.757694	0.767831	0.767831	8.71351e-05	22.2	0.825	0	0.413
61	LG1(K7)	55.44		2.03	4	0.757369	0.757369	0.768	0.768	8.4442e-05	24.6	0.998	0	0.499
62	LG1(K7)	55.445	TGG-cggg-310	2.03	4	0.757368	0.757368	0.768	0.768	8.4437e-05	24.6	1	0	0.5
63	LG1(K7)	56.445		1.71	6	0.757583	0.757583	0.767952	0.767952	8.59564e-05	23.3	0.872	0	0.436
64	LG1(K7)	57.445		1.27	7	0.758032	0.758032	0.767624	0.767624	8.99442e-05	19.7	0.855	0	0.428
65	LG1(K7)	58.445		0.71	6	0.759249	0.759249	0.766404	0.766404	0.000100146	10.6	0.951	0	0.475
66	LG1(K7)	58.696	TAG-cgga-140	0.58	5	0.759679	0.759679	0.765875	0.765875	0.000103254	7.8	0.992	0	0.496
67	LG1(K7)	59.595	CaiSSRB06A04-220	1.05	4	0.758526	0.758526	0.766429	0.766429	9.67929e-05	13.6	1	0	0.5
68	LG1(K7)	60.419	CaiSSRB06A04-210	1.39	4	0.758524	0.758524	0.76775	0.76775	9.23481e-05	17.6	1	0	0.5
69	LG1(K7)	61.419		1.33	5	0.758493	0.758493	0.767487	0.767487	9.30583e-05	16.9	0.953	0	0.477
70	LG1(K7)	62.419		1.26	4	0.758451	0.758451	0.767163	0.767163	9.39332e-05	16.2	0.998	0	0.499
71	LG1(K7)	62.446	GTG-ccag-120	1.26	4	0.75845	0.75845	0.767154	0.767154	9.39589e-05	16.1	1	0	0.5
72	LG1(K7)	63.446		0.87	7	0.758857	0.758857	0.766732	0.766732	9.73777e-05	13.1	0.972	0	0.486
73	LG1(K7)	63.83	GCG-cgcg-150	0.6	4	0.759619	0.759619	0.765833	0.765833	0.00010311	8	1	0	0.5
74	LG1(K7)	63.869	LmSSR18-2B-190*	0.6	4	0.759619	0.759619	0.765833	0.765833	0.00010311	8	1	0	0.5
75	LG1(K7)	64.57	TAC-cctc-310	1.26	4	0.75845	0.75845	0.767154	0.767154	9.39589e-05	16.1	1	0	0.5
76	LG1(K7)	64.694	CaiSSRB02M22-300	1.26	4	0.75845	0.75845	0.767154	0.767154	9.39589e-05	16.1	1	0	0.5
77	LG1(K7)	64.694	TCT-cgtt-150	1.26	4	0.75845	0.75845	0.767154	0.767154	9.39589e-05	16.1	1	0	0.5
78	LG1(K7)	64.694	CaiSSRD03H10-230	1.26	4	0.75845	0.75845	0.767154	0.767154	9.39589e-05	16.1	1	0	0.5
79	LG1(K7)	64.694	ATA-cgaa130	1.26	4	0.75845	0.75845	0.767154	0.767154	9.39589e-05	16.1	1	0	0.5
80	LG1(K7)	64.694	AGC-cgat240	1.26	4	0.75845	0.75845	0.767154	0.767154	9.39589e-05	16.1	1	0	0.5
81	LG1(K7)	65.582	CaiSSRB02M22-320	1.05	4	0.758526	0.758526	0.766429	0.766429	9.67929e-05	13.6	1	0	0.5
82	LG1(K7)	65.582	LmSSR13-2H	1.05	4	0.758526	0.758526	0.766429	0.766429	9.67929e-05	13.6	1	0	0.5
83	LG1(K7)	65.582	TTG-ctcg-170	1.05	4	0.758526	0.758526	0.766429	0.766429	9.67929e-05	13.6	1	0	0.5
84	LG1(K7)	65.582	AGT-cgat300	1.05	4	0.758526	0.758526	0.766429	0.766429	9.67929e-05	13.6	1	0	0.5
85	LG1(K7)	66.523	TCC-catc-360	1.05	4	0.758526	0.758526	0.766429	0.766429	9.67929e-05	13.6	1	0	0.5
86	LG1(K7)	67.523		1.04	5	0.758611	0.758611	0.766607	0.766607	9.65943e-05	13.8	0.936	0	0.468
87	LG1(K7)	68.523		1.01	5	0.758725	0.758725	0.766639	0.766639	9.70361e-05	13.4	0.941	0	0.47
88	LG1(K7)	69.383	TTT-cgtc-400	0.96	4	0.75885	0.75885	0.766538	0.766538	9.79328e-05	12.6	1	0	0.5
89	LG1(K7)	70.383		1.27	5	0.758275	0.758275	0.76705	0.76705	9.3407e-05	16.6	0.895	0	0.448
90	LG1(K7)	71.383		1.56	4	0.757858	0.757858	0.767347	0.767347	9.0059e-05	19.6	0.991	0	0.495
91	LG1(K7)	71.429	LmSSR1-6G	1.58	4	0.757842	0.757842	0.767357	0.767357	8.99315e-05	19.7	1	0	0.5
92	LG1(K7)	72.429		0.94	8	0.758041	0.758041	0.766581	0.766581	9.39962e-05	16.1	0.867	0	0.433
93	LG1(K7)	73.429		0.16	11	0.759794	0.759794	0.763919	0.763919	0.000107792	3.8	0.905	0	0.452
94	LG1(K7)	73.986	CaiSSRD09J21-170	0.01	4	0.761533	0.761533	0.762167	0.762167	0.000111946	0.1	1	0	0.5
95	LG1(K7)	74.986		0.03	7	0.761001	0.761001	0.762624	0.762624	0.000111392	0.6	0.87	0	0.435
96	LG1(K7)	75.986		0.07	8	0.760493	0.760493	0.763078	0.763078	0.000110384	1.5	0.824	0	0.412
97	LG1(K7)	76.986		0.11	6	0.760306	0.760306	0.763231	0.763231	0.00010992	1.9	0.862	0	0.431
98	LG1(K7)	77.986		0.13	4	0.760326	0.760326	0.763177	0.763177	0.000110029	1.8	0.985	0	0.492
99	LG1(K7)	78.077	TAA-caga-600	0.13	4	0.760333	0.760333	0.763167	0.763167	0.000110056	1.8	1	0	0.5
100	LG1(K7)	79.077		0.21	6	0.759852	0.759852	0.763638	0.763638	0.000108479	3.2	0.907	0	0.453
101	LG1(K7)	80.077		0.31	7	0.759328	0.759328	0.76419	0.76419	0.00010615	5.3	0.832	0	0.416
102	LG1(K7)	81.077		0.44	8	0.758816	0.758816	0.764773	0.764773	0.000103182	7.9	0.775	0	0.387
103	LG1(K7)	82.077		0.59	8	0.758377	0.758377	0.765309	0.765309	0.000100032	10.7	0.736	0	0.368
104	LG1(K7)	83.077		0.74	8	0.758038	0.758038	0.765755	0.765755	9.71563e-05	13.3	0.716	0	0.358
105	LG1(K7)	84.077		0.9	8	0.757792	0.757792	0.766109	0.766109	9.47572e-05	15.4	0.713	0	0.356
106	LG1(K7)	85.077		1.05	8	0.757623	0.757623	0.766387	0.766387	9.28609e-05	17.1	0.728	0	0.364
107	LG1(K7)	86.077		1.19	7	0.75752	0.75752	0.766605	0.766605	9.14445e-05	18.4	0.762	0	0.381
108	LG1(K7)	87.077		1.32	7	0.757476	0.757476	0.766774	0.766774	9.04936e-05	19.2	0.814	0	0.407
109	LG1(K7)	88.077		1.44	6	0.757493	0.757493	0.7669	0.7669	9.00231e-05	19.7	0.883	0	0.442
110	LG1(K7)	89.077		1.53	5	0.757575	0.757575	0.766984	0.766984	9.00741e-05	19.6	0.972	0	0.486
111	LG1(K7)	89.361	GTT-caat-120	1.55	4	0.757611	0.757611	0.767	0.767	9.01902e-05	19.5	1	0	0.5
112	LG2(K7)	0	TAA-cggg	0.01	4	0.761526	0.761526	0.762357	0.762357	0.000111877	0.2	1	0	0.5
113	LG2(K7)	1		0	3	0.761917	0.761917	0.761831	0.761831	0.000112044	0	0.976	0	0.488
114	LG2(K7)	1.886	AAC-ccgt180	0.01	4	0.762278	0.762278	0.7614	0.7614	0.000111855	0.2	1	0	0.5
115	LG2(K7)	2.886		0.03	4	0.762491	0.762491	0.761111	0.761111	0.000111576	0.4	0.968	0	0.484
116	LG2(K7)	3.886		0.05	4	0.762683	0.762683	0.760827	0.760827	0.0001112	0.8	0.968	0	0.484
117	LG2(K7)	4.886		0.08	4	0.762841	0.762841	0.760573	0.760573	0.000110789	1.1	1	0	0.5
118	LG2(K7)	4.891	TAC-ccag-250	0.08	4	0.762842	0.762842	0.760571	0.760571	0.000110787	1.1	1	0	0.5
119	LG2(K7)	5.891		0.09	5	0.762915	0.762915	0.760467	0.760467	0.000110583	1.3	0.962	0	0.481
120	LG2(K7)	6.891		0.1	5	0.762989	0.762989	0.760358	0.760358	0.000110357	1.5	0.928	0	0.464
121	LG2(K7)	7.891		0.11	6	0.763065	0.763065	0.760247	0.760247	0.00011011	1.7	0.897	0	0.449
122	LG2(K7)	8.891		0.12	6	0.763141	0.763141	0.760134	0.760134	0.000109844	2	0.87	0	0.435
123	LG2(K7)	9.891		0.13	6	0.763215	0.763215	0.760023	0.760023	0.000109566	2.2	0.846	0	0.423
124	LG2(K7)	10.891		0.14	7	0.763287	0.763287	0.759914	0.759914	0.000109279	2.5	0.825	0	0.413
125	LG2(K7)	11.891		0.15	7	0.763355	0.763355	0.75981	0.75981	0.000108992	2.7	0.808	0	0.404
126	LG2(K7)	12.891		0.17	7	0.763418	0.763418	0.759713	0.759713	0.000108712	3	0.794	0	0.397
127	LG2(K7)	13.891		0.18	7	0.763475	0.763475	0.759623	0.759623	0.000108445	3.2	0.783	0	0.391
128	LG2(K7)	14.891		0.19	7	0.763526	0.763526	0.759542	0.759542	0.000108198	3.4	0.775	0	0.388
129	LG2(K7)	15.891		0.2	7	0.763569	0.763569	0.759471	0.759471	0.000107975	3.6	0.771	0	0.385
130	LG2(K7)	16.891		0.21	7	0.763606	0.763606	0.759409	0.759409	0.00010778	3.8	0.769	0	0.385
131	LG2(K7)	17.891		0.22	7	0.763635	0.763635	0.759357	0.759357	0.000107617	4	0.771	0	0.386
132	LG2(K7)	18.891		0.23	7	0.763657	0.763657	0.759314	0.759314	0.000107485	4.1	0.776	0	0.388
133	LG2(K7)	19.891		0.24	7	0.763672	0.763672	0.759281	0.759281	0.000107387	4.2	0.785	0	0.392
134	LG2(K7)	20.891		0.24	7	0.763681	0.763681	0.759256	0.759256	0.000107321	4.2	0.796	0	0.398
135	LG2(K7)	21.891		0.25	7	0.763682	0.763682	0.75924	0.75924	0.000107287	4.2	0.811	0	0.405
136	LG2(K7)	22.891		0.26	6	0.763678	0.763678	0.759231	0.759231	0.000107283	4.3	0.829	0	0.414
137	LG2(K7)	23.891		0.26	6	0.763668	0.763668	0.75923	0.75923	0.000107307	4.2	0.85	0	0.425
138	LG2(K7)	24.891		0.27	6	0.763652	0.763652	0.759235	0.759235	0.000107358	4.2	0.875	0	0.437
139	LG2(K7)	25.891		0.27	5	0.763632	0.763632	0.759247	0.759247	0.000107432	4.1	0.902	0	0.451
140	LG2(K7)	26.891		0.28	5	0.763606	0.763606	0.759264	0.759264	0.000107528	4	0.934	0	0.467
141	LG2(K7)	27.891		0.28	5	0.763577	0.763577	0.759286	0.759286	0.000107642	3.9	0.969	0	0.484
142	LG2(K7)	28.72	GTA-cggt-350	0.28	4	0.76355	0.76355	0.759308	0.759308	0.000107749	3.8	1	0	0.5
143	LG2(K7)	29.72		0.17	6	0.76327	0.76327	0.75973	0.75973	0.000109057	2.7	0.964	0	0.482
144	LG2(K7)	30.72		0.07	6	0.762831	0.762831	0.760407	0.760407	0.000110645	1.3	0.952	0	0.476
145	LG2(K7)	31.72		0.01	5	0.762265	0.762265	0.761283	0.761283	0.000111816	0.2	0.965	0	0.483
146	LG2(K7)	32.646	GTA-ccaa-150	0	3	0.7618	0.7618	0.762	0.762	0.000112036	0	1	0	0.5
147	LG2(K7)	32.646	TAA-ccta-120	0	3	0.7618	0.7618	0.762	0.762	0.000112036	0	1	0	0.5
148	LG2(K7)	33.646		0.16	7	0.763411	0.763411	0.759675	0.759675	0.00010867	3	0.965	0	0.482
149	LG2(K7)	34.646		0.52	4	0.7643	0.7643	0.758588	0.758588	0.000104078	7.1	0.998	0	0.499
150	LG2(K7)	34.678	LmSSR2-11G	0.53	4	0.764316	0.764316	0.758571	0.758571	0.000103986	7.2	1	0	0.5
151	LG2(K7)	34.978	GGT-cttt-110	0.15	4	0.763278	0.763278	0.7602	0.7602	0.000109697	2.1	1	0	0.5
152	LG2(K7)	35.173	LmSSR9-7G-220*	0.15	4	0.763278	0.763278	0.7602	0.7602	0.000109697	2.1	1	0	0.5
153	LG2(K7)	35.173	GTT-cgag-200	0.15	4	0.763278	0.763278	0.7602	0.7602	0.000109697	2.1	1	0	0.5
154	LG2(K7)	35.173	TTT-ccca-350	0.15	4	0.763278	0.763278	0.7602	0.7602	0.000109697	2.1	1	0	0.5
155	LG2(K7)	35.173	AAG-cacg-410	0.15	4	0.763278	0.763278	0.7602	0.7602	0.000109697	2.1	1	0	0.5
156	LG2(K7)	36.14	LmSSR1-10A-280	0.32	4	0.763789	0.763789	0.759286	0.759286	0.000107091	4.4	1	0	0.5
157	LG2(K7)	36.432	TTC-cccg-290	0.32	4	0.763789	0.763789	0.759286	0.759286	0.000107091	4.4	1	0	0.5
158	LG2(K7)	36.432	AGG-cgtt450	0.32	4	0.763789	0.763789	0.759286	0.759286	0.000107091	4.4	1	0	0.5
159	LG2(K7)	36.873	LmSSR15-11G-130	0.53	4	0.764316	0.764316	0.758571	0.758571	0.000103986	7.2	1	0	0.5
160	LG2(K7)	37.503	TAA-caga-580	0.32	4	0.763789	0.763789	0.759286	0.759286	0.000107091	4.4	1	0	0.5
161	LG2(K7)	37.678	GGA-cgaa	0.32	4	0.763789	0.763789	0.759286	0.759286	0.000107091	4.4	1	0	0.5
162	LG2(K7)	38.162	GAC-cccc-210	0.86	4	0.76475	0.76475	0.757462	0.757462	9.93631e-05	11.3	1	0	0.5
163	LG2(K7)	38.162	ATA-cctt240	0.86	4	0.76475	0.76475	0.757462	0.757462	9.93631e-05	11.3	1	0	0.5
164	LG2(K7)	38.162	AGG-cgtt290	0.86	4	0.76475	0.76475	0.757462	0.757462	9.93631e-05	11.3	1	0	0.5
165	LG2(K7)	38.881	LmSSR4-8H	1.34	4	0.765632	0.765632	0.756786	0.756786	9.29327e-05	17.1	1	0	0.5
166	LG2(K7)	39.881		0.76	7	0.765051	0.765051	0.757498	0.757498	9.81474e-05	12.4	0.957	0	0.478
167	LG2(K7)	40.453	LmSSRHL5D12*	0.32	4	0.763789	0.763789	0.759286	0.759286	0.000107091	4.4	1	0	0.5
168	LG2(K7)	40.927	CaiSSRD02N07	0.32	4	0.763789	0.763789	0.759286	0.759286	0.000107091	4.4	1	0	0.5
169	LG2(K7)	41.207	LmSSR13-11B*	0.15	4	0.763278	0.763278	0.7602	0.7602	0.000109697	2.1	1	0	0.5
170	LG2(K7)	42.03	TTT-ccgt	0.32	4	0.763789	0.763789	0.759286	0.759286	0.000107091	4.4	1	0	0.5
171	LG2(K7)	43.003	ATT-cgtt500	0.32	4	0.763789	0.763789	0.759286	0.759286	0.000107091	4.4	1	0	0.5
172	LG2(K7)	44.003		0.32	4	0.76379	0.76379	0.759285	0.759285	0.000107087	4.4	0.951	0	0.476
173	LG2(K7)	45.003		0.32	4	0.763791	0.763791	0.759285	0.759285	0.000107086	4.4	0.942	0	0.471
174	LG2(K7)	46.003		0.32	4	0.76379	0.76379	0.759285	0.759285	0.000107089	4.4	0.973	0	0.487
175	LG2(K7)	46.449	TTG-ctcg-140	0.32	4	0.763789	0.763789	0.759286	0.759286	0.000107091	4.4	1	0	0.5
176	LG3(K7)	0	LmSSR1-10A-220	0.14	4	0.763294	0.763294	0.760375	0.760375	0.000109918	1.9	1	0	0.5
177	LG3(K7)	1		0.07	5	0.762978	0.762978	0.760748	0.760748	0.000110802	1.1	0.967	0	0.484
178	LG3(K7)	2		0.02	5	0.762484	0.762484	0.761286	0.761286	0.000111687	0.3	0.971	0	0.486
179	LG3(K7)	2.781	ATG-caag-280	0	3	0.762062	0.762062	0.761706	0.761706	0.000112014	0	1	0	0.5
180	LG3(K7)	3.781		0	4	0.762112	0.762112	0.761661	0.761661	0.000111995	0	0.958	0	0.479
181	LG3(K7)	4.781		0	4	0.762164	0.762164	0.761614	0.761614	0.00011197	0.1	0.922	0	0.461
182	LG3(K7)	5.781		0.01	5	0.762219	0.762219	0.761565	0.761565	0.000111939	0.1	0.892	0	0.446
183	LG3(K7)	6.781		0.01	5	0.762275	0.762275	0.761516	0.761516	0.000111902	0.1	0.868	0	0.434
184	LG3(K7)	7.781		0.01	5	0.762331	0.762331	0.761467	0.761467	0.00011186	0.2	0.849	0	0.425
185	LG3(K7)	8.781		0.01	5	0.762386	0.762386	0.76142	0.76142	0.000111813	0.2	0.837	0	0.418
186	LG3(K7)	9.781		0.02	5	0.76244	0.76244	0.761375	0.761375	0.000111763	0.3	0.83	0	0.415
187	LG3(K7)	10.781		0.02	5	0.762491	0.762491	0.761334	0.761334	0.000111712	0.3	0.829	0	0.415
188	LG3(K7)	11.781		0.02	5	0.762538	0.762538	0.761296	0.761296	0.000111662	0.3	0.834	0	0.417
189	LG3(K7)	12.781		0.02	5	0.762581	0.762581	0.761263	0.761263	0.000111614	0.4	0.845	0	0.423
190	LG3(K7)	13.781		0.03	5	0.76262	0.76262	0.761235	0.761235	0.000111569	0.4	0.862	0	0.431
191	LG3(K7)	14.781		0.03	5	0.762654	0.762654	0.761212	0.761212	0.000111529	0.5	0.884	0	0.442
192	LG3(K7)	15.781		0.03	5	0.762683	0.762683	0.761193	0.761193	0.000111494	0.5	0.912	0	0.456
193	LG3(K7)	16.781		0.04	4	0.762708	0.762708	0.761179	0.761179	0.000111466	0.5	0.947	0	0.473
194	LG3(K7)	17.781		0.04	4	0.762728	0.762728	0.761169	0.761169	0.000111443	0.5	0.987	0	0.494
195	LG3(K7)	18.053	TAT-cctt-130	0.04	4	0.762733	0.762733	0.761167	0.761167	0.000111437	0.5	0.999	0	0.5
196	LG3(K7)	19.053		0.03	5	0.762603	0.762603	0.76129	0.76129	0.00011162	0.4	0.965	0	0.482
197	LG3(K7)	20.053		0.01	5	0.762443	0.762443	0.761432	0.761432	0.000111794	0.2	0.937	0	0.468
198	LG3(K7)	21.053		0.01	5	0.76225	0.76225	0.761593	0.761593	0.00011194	0.1	0.914	0	0.457
199	LG3(K7)	22.053		0	5	0.762023	0.762023	0.761771	0.761771	0.00011203	0	0.897	0	0.449
200	LG3(K7)	23.053		0	5	0.761763	0.761763	0.761962	0.761962	0.000112036	0	0.886	0	0.443
201	LG3(K7)	24.053		0.01	6	0.761481	0.761481	0.762157	0.762157	0.000111935	0.1	0.881	0	0.44
202	LG3(K7)	25.053		0.02	6	0.761191	0.761191	0.762344	0.762344	0.000111726	0.3	0.881	0	0.44
203	LG3(K7)	26.053		0.03	6	0.76091	0.76091	0.762513	0.762513	0.000111431	0.5	0.887	0	0.443
204	LG3(K7)	27.053		0.05	6	0.760651	0.760651	0.762658	0.762658	0.000111089	0.9	0.899	0	0.449
205	LG3(K7)	28.053		0.07	6	0.760421	0.760421	0.762777	0.762777	0.000110737	1.2	0.916	0	0.458
206	LG3(K7)	29.053		0.09	5	0.760223	0.760223	0.762872	0.762872	0.000110401	1.5	0.939	0	0.47
207	LG3(K7)	30.053		0.12	5	0.760052	0.760052	0.762946	0.762946	0.000110096	1.7	0.968	0	0.484
208	LG3(K7)	30.984	GTT-ccat-210	0.14	4	0.759917	0.759917	0.763	0.763	0.000109846	2	1	0	0.5
209	LG3(K7)	31.984		0.16	5	0.759768	0.759768	0.763076	0.763076	0.000109519	2.3	0.934	0	0.467
210	LG3(K7)	32.984		0.17	5	0.759626	0.759626	0.763148	0.763148	0.000109188	2.6	0.882	0	0.441
211	LG3(K7)	33.984		0.19	5	0.759496	0.759496	0.763213	0.763213	0.000108866	2.8	0.843	0	0.421
212	LG3(K7)	34.984		0.2	6	0.759382	0.759382	0.763271	0.763271	0.000108571	3.1	0.817	0	0.409
213	LG3(K7)	35.984		0.21	6	0.759289	0.759289	0.763319	0.763319	0.000108317	3.3	0.806	0	0.403
214	LG3(K7)	36.984		0.23	6	0.75922	0.75922	0.763356	0.763356	0.000108118	3.5	0.807	0	0.404
215	LG3(K7)	37.984		0.24	6	0.759177	0.759177	0.763382	0.763382	0.000107984	3.6	0.822	0	0.411
216	LG3(K7)	38.984		0.24	5	0.759161	0.759161	0.763397	0.763397	0.000107921	3.7	0.851	0	0.425
217	LG3(K7)	39.984		0.25	5	0.759172	0.759172	0.7634	0.7634	0.000107927	3.7	0.892	0	0.446
218	LG3(K7)	40.984		0.26	5	0.759207	0.759207	0.763393	0.763393	0.000108	3.6	0.948	0	0.474
219	LG3(K7)	41.755	LmSSR1-8H-600	0.26	4	0.75925	0.75925	0.763381	0.763381	0.000108097	3.5	1	0	0.5
220	LG3(K7)	42.755		0.2	6	0.759412	0.759412	0.763313	0.763313	0.000108509	3.2	0.947	0	0.474
221	LG3(K7)	43.755		0.14	7	0.759783	0.759783	0.763146	0.763146	0.00010939	2.4	0.92	0	0.46
222	LG3(K7)	44.755		0.08	7	0.760351	0.760351	0.762859	0.762859	0.000110549	1.3	0.919	0	0.459
223	LG3(K7)	45.755		0.03	6	0.760988	0.760988	0.762492	0.762492	0.0001115	0.5	0.943	0	0.472
224	LG3(K7)	46.755		0.01	4	0.761524	0.761524	0.762139	0.762139	0.000111954	0.1	0.993	0	0.497
225	LG3(K7)	46.861	GCG-cgcg-250	0	4	0.761571	0.761571	0.762105	0.762105	0.000111976	0.1	1	0	0.5
226	LG3(K7)	47.028	LmSSR18-11E	0.02	4	0.761267	0.761267	0.762389	0.762389	0.000111734	0.3	1	0	0.5
227	LG3(K7)	47.951	CaiSSRB08J20	0.34	4	0.7594	0.7594	0.763944	0.763944	0.000106926	4.6	1	0	0.5
228	LG3(K7)	48.697	TAA-caga-250	0.06	4	0.760786	0.760786	0.762684	0.762684	0.000111166	0.8	1	0	0.5
229	LG3(K7)	49.559	ATA-caaa-250	0.33	4	0.759077	0.759077	0.7637	0.7637	0.000106943	4.6	1	0	0.5
230	LG3(K7)	50.118	TTC-cgtc-160	0.26	4	0.75925	0.75925	0.763381	0.763381	0.000108097	3.5	1	0	0.5
231	LG3(K7)	50.989	TAC-ccag-280	0.26	4	0.759385	0.759385	0.7635	0.7635	0.000108002	3.6	1	0	0.5
232	LG3(K7)	51.529	ATA-ccct190	0.1	4	0.760308	0.760308	0.7629	0.7629	0.000110441	1.4	1	0	0.5
233	LG3(K7)	52.529		0.36	7	0.758591	0.758591	0.764004	0.764004	0.000105059	6.2	0.909	0	0.455
234	LG3(K7)	53.529		0.69	7	0.7575	0.7575	0.764677	0.764677	9.97954e-05	10.9	0.901	0	0.451
235	LG3(K7)	54.529		0.98	5	0.75711	0.75711	0.764964	0.764964	9.73325e-05	13.1	0.977	0	0.488
236	LG3(K7)	54.717	GCA-cgca	1.03	4	0.757077	0.757077	0.765	0.765	9.70583e-05	13.4	1	0	0.5
237	LG3(K7)	55.679	LmSSR15-9D-490*	0.5	4	0.758	0.758	0.763818	0.763818	0.000104523	6.7	1	0	0.5
238	LG3(K7)	56.679		0.43	4	0.758481	0.758481	0.763814	0.763814	0.000105471	5.9	0.993	0	0.496
239	LG3(K7)	56.712	ATT-cgtt190	0.43	4	0.7585	0.7585	0.76381	0.76381	0.000105522	5.8	1	0	0.5
240	LG3(K7)	57.712		0.43	4	0.7585	0.7585	0.76381	0.76381	0.000105522	5.8	0.994	0	0.497
241	LG3(K7)	57.887	TAT-cctt-310	0.43	4	0.7585	0.7585	0.76381	0.76381	0.000105522	5.8	1	0	0.5
242	LG3(K7)	57.911	ATC-caac-260	0.43	4	0.7585	0.7585	0.76381	0.76381	0.000105522	5.8	1	0	0.5
243	LG3(K7)	57.911	TTA-cgtg-170	0.43	4	0.7585	0.7585	0.76381	0.76381	0.000105522	5.8	1	0	0.5
244	LG3(K7)	57.957	TAG-cgga-100	0.45	4	0.758473	0.758473	0.763881	0.763881	0.000105228	6.1	0.993	0	0.497
245	LG3(K7)	58.162	TAC-ccag-70	0.53	4	0.758385	0.758385	0.76415	0.76415	0.00010411	7.1	1	0	0.5
246	LG3(K7)	59.162		0.42	5	0.758662	0.758662	0.763884	0.763884	0.000105594	5.8	0.936	0	0.468
247	LG3(K7)	60.162		0.31	5	0.759031	0.759031	0.763575	0.763575	0.000107216	4.3	0.941	0	0.47
248	LG3(K7)	61.016	LmSSR18-10D	0.23	4	0.759417	0.759417	0.763286	0.763286	0.000108582	3.1	1	0	0.5
249	LG3(K7)	62.016		0.37	4	0.758695	0.758695	0.763693	0.763693	0.00010627	5.2	0.963	0	0.482
250	LG3(K7)	62.382	LmSSRS393D1-260*	0.43	4	0.7585	0.7585	0.76381	0.76381	0.000105522	5.8	1	0	0.5
251	LG3(K7)	62.382	LmSSRH1-2G	0.43	4	0.7585	0.7585	0.76381	0.76381	0.000105522	5.8	1	0	0.5
252	LG3(K7)	63.382		0.5	4	0.758414	0.758414	0.764056	0.764056	0.000104503	6.7	0.98	0	0.49
253	LG3(K7)	63.843	GGG-cgag-490	0.53	4	0.758385	0.758385	0.76415	0.76415	0.00010411	7.1	1	0	0.5
254	LG3(K7)	64.347	LmSSR12-6B*	0.14	4	0.760143	0.760143	0.763158	0.763158	0.000109825	2	1	0	0.5
255	LG3(K7)	65.347		0	4	0.761694	0.761694	0.762015	0.762015	0.000112021	0	0.974	0	0.487
256	LG3(K7)	65.491	LmSSR9-7B	0	3	0.761929	0.761929	0.761842	0.761842	0.000112044	0	1	0	0.5
257	LG3(K7)	66.343	GTG-caag-310	0.57	4	0.757727	0.757727	0.763955	0.763955	0.000103428	7.7	1	0	0.5
258	LG3(K7)	67.343		0.46	4	0.758385	0.758385	0.763866	0.763866	0.000105102	6.2	0.987	0	0.494
259	LG3(K7)	67.379	TCC-catc-200	0.45	4	0.758417	0.758417	0.763857	0.763857	0.000105197	6.1	1	0	0.5
260	LG3(K7)	68.379		0.49	5	0.758235	0.758235	0.763962	0.763962	0.000104456	6.8	0.915	0	0.457
261	LG3(K7)	69.379		0.53	5	0.758126	0.758126	0.764026	0.764026	0.000103988	7.2	0.92	0	0.46
262	LG3(K7)	70.257	ATT-cgtt310	0.55	4	0.758083	0.758083	0.764048	0.764048	0.000103814	7.3	1	0	0.5
263	LG3(K7)	71.257		0.51	4	0.75802	0.75802	0.763868	0.763868	0.00010437	6.9	0.992	0	0.496
264	LG3(K7)	71.515	LmSSR13-8B	0.5	4	0.758	0.758	0.763818	0.763818	0.000104523	6.7	1	0	0.5
265	LG3(K7)	72.125	AAT-ccgt290	0.5	4	0.758	0.758	0.763818	0.763818	0.000104523	6.7	1	0	0.5
266	LG3(K7)	73.042	GAA-ctaa-255	0.17	4	0.759846	0.759846	0.7632	0.7632	0.00010936	2.4	1	0	0.5
267	LG3(K7)	74.042		0.17	4	0.759846	0.759846	0.7632	0.7632	0.00010936	2.4	0.991	0	0.496
268	LG3(K7)	74.355	GTG-cttt	0.17	4	0.759846	0.759846	0.7632	0.7632	0.00010936	2.4	1	0	0.5
269	LG3(K7)	75.355		0.31	6	0.758795	0.758795	0.763667	0.763667	0.000106532	4.9	0.936	0	0.468
270	LG3(K7)	76.355		0.42	6	0.758237	0.758237	0.763823	0.763823	0.000104965	6.3	0.939	0	0.47
271	LG3(K7)	77.263	LmSSR15-10H*	0.5	4	0.758	0.758	0.763818	0.763818	0.000104523	6.7	1	0	0.5
272	LG3(K7)	78.263		0.6	4	0.757917	0.757917	0.764142	0.764142	0.000103081	8	0.999	0	0.499
273	LG3(K7)	78.268	ATT-caat-300	0.6	4	0.757917	0.757917	0.764143	0.764143	0.000103075	8	1	0	0.5
274	LG3(K7)	79.268		0.55	5	0.757988	0.757988	0.76404	0.76404	0.000103638	7.5	0.931	0	0.466
275	LG3(K7)	80.268		0.5	5	0.758084	0.758084	0.76391	0.76391	0.000104336	6.9	0.92	0	0.46
276	LG3(K7)	81.268		0.45	4	0.758213	0.758213	0.76375	0.76375	0.000105186	6.1	0.967	0	0.484
277	LG3(K7)	81.645	LmSSR2-12F180	0.43	4	0.758273	0.758273	0.763682	0.763682	0.000105544	5.8	1	0	0.5
278	LG3(K7)	82.645		0.44	5	0.758464	0.758464	0.763879	0.763879	0.000105215	6.1	0.849	0	0.424
279	LG3(K7)	83.645		0.43	5	0.758712	0.758712	0.764006	0.764006	0.000105309	6	0.87	0	0.435
280	LG3(K7)	84.395	LmSSRH17-1G	0.42	4	0.758929	0.758929	0.764053	0.764053	0.000105633	5.7	1	0	0.5
281	LG3(K7)	85.395		0.41	5	0.758918	0.758918	0.764031	0.764031	0.000105674	5.7	0.94	0	0.47
282	LG3(K7)	86.395		0.39	5	0.758914	0.758914	0.764004	0.764004	0.000105747	5.6	0.888	0	0.444
283	LG3(K7)	87.395		0.37	5	0.758919	0.758919	0.76397	0.76397	0.000105856	5.5	0.842	0	0.421
284	LG3(K7)	88.395		0.35	6	0.758933	0.758933	0.76393	0.76393	0.000106003	5.4	0.804	0	0.402
285	LG3(K7)	89.395		0.33	6	0.758958	0.758958	0.763883	0.763883	0.000106193	5.2	0.774	0	0.387
286	LG3(K7)	90.395		0.31	6	0.758995	0.758995	0.763828	0.763828	0.000106427	5	0.75	0	0.375
287	LG3(K7)	91.395		0.29	6	0.759047	0.759047	0.763764	0.763764	0.000106707	4.8	0.733	0	0.367
288	LG3(K7)	92.395		0.27	7	0.759115	0.759115	0.763692	0.763692	0.000107035	4.5	0.724	0	0.362
289	LG3(K7)	93.395		0.24	7	0.7592	0.7592	0.763609	0.763609	0.00010741	4.1	0.721	0	0.361
290	LG3(K7)	94.395		0.22	7	0.759305	0.759305	0.763517	0.763517	0.000107829	3.8	0.726	0	0.363
291	LG3(K7)	95.395		0.19	7	0.75943	0.75943	0.763415	0.763415	0.000108283	3.4	0.738	0	0.369
292	LG3(K7)	96.395		0.17	7	0.759575	0.759575	0.763304	0.763304	0.000108761	2.9	0.756	0	0.378
293	LG3(K7)	97.395		0.15	6	0.759736	0.759736	0.763186	0.763186	0.000109245	2.5	0.782	0	0.391
294	LG3(K7)	98.395		0.13	6	0.759911	0.759911	0.763063	0.763063	0.000109716	2.1	0.815	0	0.407
295	LG3(K7)	99.395		0.11	6	0.760094	0.760094	0.762939	0.762939	0.000110154	1.7	0.855	0	0.428
296	LG3(K7)	100.395		0.09	5	0.760279	0.760279	0.762816	0.762816	0.000110546	1.3	0.902	0	0.451
297	LG3(K7)	101.395		0.07	4	0.76046	0.76046	0.762698	0.762698	0.000110884	1	0.957	0	0.479
298	LG3(K7)	102.099	GTA-cact-50	0.06	4	0.760583	0.760583	0.762619	0.762619	0.000111087	0.9	1	0	0.5
299	LG3(K7)	103.099		0.1	5	0.760162	0.760162	0.762853	0.762853	0.000110374	1.5	0.966	0	0.483
300	LG3(K7)	104.099		0.14	7	0.759671	0.759671	0.763121	0.763121	0.000109303	2.4	0.938	0	0.469
301	LG3(K7)	105.099		0.2	8	0.759144	0.759144	0.763406	0.763406	0.00010787	3.7	0.915	0	0.458
302	LG3(K7)	106.099		0.27	8	0.758643	0.758643	0.76367	0.76367	0.000106251	5.2	0.898	0	0.449
303	LG3(K7)	107.099		0.34	8	0.758226	0.758226	0.763883	0.763883	0.000104723	6.5	0.887	0	0.443
304	LG3(K7)	108.099		0.41	8	0.757905	0.757905	0.76404	0.76404	0.000103457	7.7	0.881	0	0.441
305	LG3(K7)	109.099		0.48	8	0.757664	0.757664	0.764149	0.764149	0.000102477	8.5	0.881	0	0.44
306	LG3(K7)	110.099		0.54	7	0.757482	0.757482	0.764223	0.764223	0.000101738	9.2	0.886	0	0.443
307	LG3(K7)	111.099		0.6	7	0.757341	0.757341	0.764272	0.764272	0.000101188	9.7	0.898	0	0.449
308	LG3(K7)	112.099		0.66	6	0.75723	0.75723	0.764301	0.764301	0.000100782	10.1	0.914	0	0.457
309	LG3(K7)	113.099		0.71	6	0.757139	0.757139	0.764317	0.764317	0.000100488	10.3	0.937	0	0.468
310	LG3(K7)	114.099		0.76	5	0.757065	0.757065	0.764322	0.764322	0.000100283	10.5	0.965	0	0.482
311	LG3(K7)	115.099		0.8	4	0.757002	0.757002	0.764318	0.764318	0.000100148	10.6	0.999	0	0.499
312	LG3(K7)	115.136	GGG-cgag-520	0.8	4	0.757	0.757	0.764318	0.764318	0.000100145	10.6	1	0	0.5
313	LG3(K7)	116.136		0.77	5	0.757051	0.757051	0.764353	0.764353	0.0001001	10.7	0.962	0	0.481
314	LG3(K7)	117.136		0.74	6	0.757113	0.757113	0.764382	0.764382	0.000100117	10.6	0.927	0	0.463
315	LG3(K7)	118.136		0.7	6	0.757185	0.757185	0.764403	0.764403	0.000100199	10.6	0.895	0	0.447
316	LG3(K7)	119.136		0.66	7	0.757269	0.757269	0.764416	0.764416	0.000100347	10.4	0.865	0	0.433
317	LG3(K7)	120.136		0.62	7	0.757365	0.757365	0.764422	0.764422	0.000100566	10.2	0.838	0	0.419
318	LG3(K7)	121.136		0.58	7	0.757474	0.757474	0.764419	0.764419	0.000100858	10	0.814	0	0.407
319	LG3(K7)	122.136		0.54	8	0.757598	0.757598	0.764407	0.764407	0.000101224	9.7	0.793	0	0.396
320	LG3(K7)	123.136		0.5	8	0.757737	0.757737	0.764384	0.764384	0.000101669	9.3	0.774	0	0.387
321	LG3(K7)	124.136		0.45	9	0.757892	0.757892	0.76435	0.76435	0.000102193	8.8	0.758	0	0.379
322	LG3(K7)	125.136		0.41	9	0.758066	0.758066	0.764304	0.764304	0.000102798	8.3	0.744	0	0.372
323	LG3(K7)	126.136		0.36	9	0.758259	0.758259	0.764244	0.764244	0.000103483	7.6	0.733	0	0.366
324	LG3(K7)	127.136		0.32	10	0.758471	0.758471	0.764169	0.764169	0.000104242	7	0.724	0	0.362
325	LG3(K7)	128.136		0.28	10	0.758704	0.758704	0.764077	0.764077	0.000105069	6.2	0.718	0	0.359
326	LG3(K7)	129.136		0.24	10	0.758957	0.758957	0.763966	0.763966	0.000105948	5.4	0.714	0	0.357
327	LG3(K7)	130.136		0.2	10	0.759227	0.759227	0.763836	0.763836	0.000106856	4.6	0.713	0	0.357
328	LG3(K7)	131.136		0.16	10	0.759511	0.759511	0.763687	0.763687	0.000107764	3.8	0.714	0	0.357
329	LG3(K7)	132.136		0.13	10	0.759803	0.759803	0.763521	0.763521	0.000108637	3	0.718	0	0.359
330	LG3(K7)	133.136		0.1	10	0.760097	0.760097	0.763341	0.763341	0.000109442	2.3	0.724	0	0.362
331	LG3(K7)	134.136		0.07	9	0.760386	0.760386	0.763149	0.763149	0.000110149	1.7	0.733	0	0.366
332	LG3(K7)	135.136		0.05	9	0.760662	0.760662	0.762952	0.762952	0.00011074	1.2	0.744	0	0.372
333	LG3(K7)	136.136		0.03	8	0.760922	0.760922	0.762754	0.762754	0.000111209	0.7	0.758	0	0.379
334	LG3(K7)	137.136		0.02	7	0.761161	0.761161	0.762558	0.762558	0.000111558	0.4	0.774	0	0.387
335	LG3(K7)	138.136		0.01	7	0.761378	0.761378	0.762369	0.762369	0.0001118	0.2	0.793	0	0.397
336	LG3(K7)	139.136		0	6	0.761572	0.761572	0.762189	0.762189	0.000111951	0.1	0.815	0	0.407
337	LG3(K7)	140.136		0	5	0.761745	0.761745	0.762018	0.762018	0.000112027	0	0.839	0	0.419
338	LG3(K7)	141.136		0	4	0.761897	0.761897	0.761859	0.761859	0.000112046	0	0.865	0	0.433
339	LG3(K7)	142.136		0	5	0.762031	0.762031	0.761711	0.761711	0.00011202	0	0.895	0	0.448
340	LG3(K7)	143.136		0	5	0.762147	0.762147	0.761574	0.761574	0.000111964	0.1	0.927	0	0.464
341	LG3(K7)	144.136		0.01	4	0.762248	0.762248	0.761448	0.761448	0.000111887	0.1	0.962	0	0.481
342	LG3(K7)	145.125	TTA-ccga-190	0.02	4	0.762333	0.762333	0.761333	0.761333	0.000111798	0.2	1	0	0.5
343	LG4(K7)	0	GTG-cgct-160	0	3	0.761765	0.761765	0.762	0.762	0.000112032	0	1	0	0.5
344	LG4(K7)	1		0	4	0.761937	0.761937	0.761808	0.761808	0.000112042	0	0.931	0	0.466
345	LG4(K7)	1.775	GTT-ccat-150	0	4	0.762053	0.762053	0.761643	0.761643	0.000112005	0	1	0	0.5
346	LG4(K7)	2.775		0.01	5	0.762321	0.762321	0.761296	0.761296	0.000111788	0.2	0.955	0	0.477
347	LG4(K7)	3.775		0.04	5	0.762612	0.762612	0.76094	0.76094	0.000111358	0.6	0.931	0	0.466
348	LG4(K7)	4.775		0.07	5	0.76288	0.76288	0.760631	0.760631	0.000110797	1.1	0.93	0	0.465
349	LG4(K7)	5.775		0.11	5	0.763096	0.763096	0.760393	0.760393	0.000110238	1.6	0.95	0	0.475
350	LG4(K7)	6.775		0.15	4	0.763259	0.763259	0.760219	0.760219	0.000109755	2	0.993	0	0.496
351	LG4(K7)	6.91	TAA-ccta-360	0.15	4	0.763278	0.763278	0.7602	0.7602	0.000109697	2.1	1	0	0.5
352	LG4(K7)	7.91		0.15	4	0.763278	0.763278	0.7602	0.7602	0.000109696	2.1	0.977	0	0.489
353	LG4(K7)	8.91		0.15	4	0.763278	0.763278	0.7602	0.7602	0.000109697	2.1	0.985	0	0.492
354	LG4(K7)	9.422	TAG-ctgg-185	0.15	4	0.763278	0.763278	0.7602	0.7602	0.000109697	2.1	1	0	0.5
355	LG4(K7)	10.284	TGA-cgga-120	0.15	4	0.763278	0.763278	0.7602	0.7602	0.000109697	2.1	1	0	0.5
356	LG4(K7)	11.284		0.15	4	0.763278	0.763278	0.7602	0.7602	0.000109696	2.1	0.965	0	0.482
357	LG4(K7)	12.284		0.15	4	0.763278	0.763278	0.7602	0.7602	0.000109697	2.1	0.989	0	0.494
358	LG4(K7)	12.476	GTT-ccat-220	0.15	4	0.763278	0.763278	0.7602	0.7602	0.000109697	2.1	1	0	0.5
359	LG4(K7)	13.476		0.14	4	0.763201	0.763201	0.760248	0.760248	0.000109889	1.9	0.904	0	0.452
360	LG4(K7)	14.476		0.13	4	0.763121	0.763121	0.760301	0.760301	0.000110086	1.7	0.871	0	0.435
361	LG4(K7)	15.476		0.11	4	0.763038	0.763038	0.76036	0.76036	0.000110286	1.6	0.9	0	0.45
362	LG4(K7)	16.476		0.1	4	0.762952	0.762952	0.760425	0.760425	0.000110486	1.4	0.993	0	0.497
363	LG4(K7)	16.53	LmSSR11-3E-210*	0.1	4	0.762947	0.762947	0.760429	0.760429	0.000110496	1.4	1	0	0.5
364	LG4(K7)	17.53		0.13	4	0.763127	0.763127	0.760297	0.760297	0.000110072	1.8	0.965	0	0.482
365	LG4(K7)	18.429	ATA-cctt90	0.15	4	0.763278	0.763278	0.7602	0.7602	0.000109697	2.1	1	0	0.5
366	LG4(K7)	18.429	TAT-cgtt	0.15	4	0.763278	0.763278	0.7602	0.7602	0.000109697	2.1	1	0	0.5
367	LG4(K7)	18.51	ATC-cggt290	0.15	4	0.763278	0.763278	0.7602	0.7602	0.000109697	2.1	1	0	0.5
368	LG4(K7)	18.557	CaiSSRB08G02-140	0	4	0.762118	0.762118	0.761625	0.761625	0.000111985	0.1	1	0	0.5
369	LG4(K7)	19.506	TTC-ctcc	0.15	4	0.763278	0.763278	0.7602	0.7602	0.000109697	2.1	1	0	0.5
370	LG4(K7)	19.506	LmSSR2-7H	0.15	4	0.763278	0.763278	0.7602	0.7602	0.000109697	2.1	1	0	0.5
371	LG4(K7)	19.833	ATA-ctaa-170	0.15	4	0.763278	0.763278	0.7602	0.7602	0.000109697	2.1	1	0	0.5
372	LG4(K7)	19.834	CaiSSRA01D16	0.15	4	0.763278	0.763278	0.7602	0.7602	0.000109697	2.1	1	0	0.5
373	LG4(K7)	20.295	GAC-cgtt-140	0.15	4	0.763278	0.763278	0.7602	0.7602	0.000109697	2.1	1	0	0.5
374	LG4(K7)	20.548	LmSSRS393D1-180*	0.15	4	0.763278	0.763278	0.7602	0.7602	0.000109697	2.1	1	0	0.5
375	LG4(K7)	20.548	TCA-cata	0.15	4	0.763278	0.763278	0.7602	0.7602	0.000109697	2.1	1	0	0.5
376	LG4(K7)	20.548	GAA-cgtg-220	0.15	4	0.763278	0.763278	0.7602	0.7602	0.000109697	2.1	1	0	0.5
377	LG4(K7)	20.548	LmSSR16-12B	0.15	4	0.763278	0.763278	0.7602	0.7602	0.000109697	2.1	1	0	0.5
378	LG4(K7)	20.688	TAG-cctg-120	0.15	4	0.763278	0.763278	0.7602	0.7602	0.000109697	2.1	1	0	0.5
379	LG4(K7)	20.846	ATC-ccat150	0.15	4	0.763278	0.763278	0.7602	0.7602	0.000109697	2.1	1	0	0.5
380	LG4(K7)	21.281	GTC-cgct-380	0.05	4	0.762706	0.762706	0.761	0.761	0.000111319	0.6	1	0	0.5
381	LG4(K7)	21.645	TTT-ctct	0	4	0.762118	0.762118	0.761625	0.761625	0.000111985	0.1	1	0	0.5
382	LG4(K7)	21.84	ATA-cctt120	0	4	0.762118	0.762118	0.761625	0.761625	0.000111985	0.1	1	0	0.5
383	LG4(K7)	22.59	ATA-caaa-210	0	3	0.762062	0.762062	0.761706	0.761706	0.000112014	0	1	0	0.5
384	LG4(K7)	22.792	AAC-cacc-250	0.01	4	0.762313	0.762313	0.761471	0.761471	0.000111869	0.2	1	0	0.5
385	LG4(K7)	23.324	ATC-cggt190	0.15	4	0.763278	0.763278	0.7602	0.7602	0.000109697	2.1	1	0	0.5
386	LG4(K7)	24.324		0.15	4	0.763278	0.763278	0.7602	0.7602	0.000109697	2.1	0.93	0	0.465
387	LG4(K7)	25.253	AAC-ccgt200	0.15	4	0.763278	0.763278	0.7602	0.7602	0.000109697	2.1	1	0	0.5
388	LG4(K7)	25.253	AAC-ccgt100	0.15	4	0.763278	0.763278	0.7602	0.7602	0.000109697	2.1	1	0	0.5
389	LG4(K7)	26.253		0.14	4	0.763213	0.763213	0.76024	0.76024	0.00010986	2	0.952	0	0.476
390	LG4(K7)	27.253		0.13	4	0.763145	0.763145	0.760285	0.760285	0.000110027	1.8	0.93	0	0.465
391	LG4(K7)	28.253		0.12	4	0.763075	0.763075	0.760333	0.760333	0.000110198	1.6	0.933	0	0.467
392	LG4(K7)	29.253		0.11	4	0.763002	0.763002	0.760386	0.760386	0.00011037	1.5	0.962	0	0.481
393	LG4(K7)	29.995	GTT-caat-140	0.1	4	0.762947	0.762947	0.760429	0.760429	0.000110496	1.4	1	0	0.5
394	LG4(K7)	30.995		0.06	4	0.762719	0.762719	0.760666	0.760666	0.000111027	0.9	0.942	0	0.471
395	LG4(K7)	31.868	GGT-cgat	0.04	4	0.7625	0.7625	0.760923	0.760923	0.000111452	0.5	1	0	0.5
396	LG4(K7)	32.868		0.05	6	0.762678	0.762678	0.760656	0.760656	0.000111068	0.9	0.889	0	0.445
397	LG4(K7)	33.868		0.07	6	0.762798	0.762798	0.760477	0.760477	0.000110757	1.2	0.86	0	0.43
398	LG4(K7)	34.868		0.07	6	0.76279	0.76279	0.760488	0.760488	0.000110779	1.1	0.912	0	0.456
399	LG4(K7)	35.59	TTG-cgta-220	0.07	4	0.7627	0.7627	0.760615	0.760615	0.000111008	0.9	1	0	0.5
400	LG5(K7)	0	CaiSSRb120-240	0.01	4	0.762176	0.762176	0.761562	0.761562	0.000111952	0.1	1	0	0.5
401	LG5(K7)	0	CaiSSRb120-260	0.01	4	0.762176	0.762176	0.761562	0.761562	0.000111952	0.1	1	0	0.5
402	LG5(K7)	1		0.01	4	0.762186	0.762186	0.761552	0.761552	0.000111945	0.1	0.973	0	0.486
403	LG5(K7)	2		0.01	4	0.762196	0.762196	0.761541	0.761541	0.000111939	0.1	0.956	0	0.478
404	LG5(K7)	3		0.01	4	0.762206	0.762206	0.761531	0.761531	0.000111932	0.1	0.95	0	0.475
405	LG5(K7)	4		0.01	4	0.762216	0.762216	0.761521	0.761521	0.000111925	0.1	0.955	0	0.477
406	LG5(K7)	5		0.01	4	0.762225	0.762225	0.761511	0.761511	0.000111919	0.1	0.97	0	0.485
407	LG5(K7)	6		0.01	4	0.762234	0.762234	0.761501	0.761501	0.000111912	0.1	0.996	0	0.498
408	LG5(K7)	6.123	AAT-cgct165	0.01	4	0.762235	0.762235	0.7615	0.7615	0.000111911	0.1	1	0	0.5
409	LG5(K7)	7.123		0	4	0.762091	0.762091	0.761668	0.761668	0.000112001	0	0.941	0	0.47
410	LG5(K7)	8.123		0	4	0.761917	0.761917	0.761843	0.761843	0.000112045	0	0.91	0	0.455
411	LG5(K7)	9.123		0	4	0.761722	0.761722	0.762014	0.762014	0.000112025	0	0.907	0	0.453
412	LG5(K7)	10.123		0.01	4	0.76152	0.76152	0.762166	0.762166	0.000111943	0.1	0.931	0	0.466
413	LG5(K7)	11.123		0.01	4	0.761327	0.761327	0.762292	0.762292	0.000111818	0.2	0.984	0	0.492
414	LG5(K7)	11.346	ATA-ccct140	0.02	4	0.761286	0.761286	0.762316	0.762316	0.000111787	0.2	1	0	0.5
415	LG5(K7)	12.346		0.01	4	0.761395	0.761395	0.762277	0.762277	0.000111854	0.2	0.976	0	0.488
416	LG5(K7)	13.346		0.01	4	0.761533	0.761533	0.762197	0.762197	0.000111936	0.1	0.992	0	0.496
417	LG5(K7)	13.56	LmSSR10-10D130	0.01	4	0.761562	0.761562	0.762176	0.762176	0.000111952	0.1	1	0	0.5
418	LG5(K7)	14.56		0	4	0.761704	0.761704	0.762043	0.762043	0.000112017	0	0.969	0	0.485
419	LG5(K7)	15.56		0	3	0.761852	0.761852	0.761904	0.761904	0.000112045	0	0.953	0	0.477
420	LG5(K7)	16.56		0	4	0.762002	0.762002	0.761763	0.761763	0.000112032	0	0.952	0	0.476
421	LG5(K7)	17.56		0	4	0.76215	0.76215	0.761623	0.761623	0.000111977	0.1	0.966	0	0.483
422	LG5(K7)	18.56		0.01	4	0.76229	0.76229	0.761492	0.761492	0.000111887	0.1	0.994	0	0.497
423	LG5(K7)	18.726	TCT-catt-230	0.01	4	0.762313	0.762313	0.761471	0.761471	0.000111869	0.2	1	0	0.5
424	LG5(K7)	19.726		0.04	4	0.76263	0.76263	0.761056	0.761056	0.000111427	0.6	0.889	0	0.444
425	LG5(K7)	20.375	TGA-cgga-220	0.06	4	0.762778	0.762778	0.7608	0.7608	0.000111076	0.9	1	0	0.5
426	LG5(K7)	21.375		0.03	4	0.762503	0.762503	0.761164	0.761164	0.0001116	0.4	0.909	0	0.454
427	LG5(K7)	22.375		0.01	4	0.762177	0.762177	0.761556	0.761556	0.00011195	0.1	0.953	0	0.476
428	LG5(K7)	22.725	TAA-ccat-120	0	3	0.762059	0.762059	0.761687	0.761687	0.000112011	0	1	0	0.5
429	LG5(K7)	23.725		0	3	0.761864	0.761864	0.761897	0.761897	0.000112046	0	0.955	0	0.478
430	LG5(K7)	24.725		0	4	0.761683	0.761683	0.762164	0.762164	0.00011199	0	0.972	0	0.486
431	LG5(K7)	25.046	TAC-cctc-170	0.01	4	0.76165	0.76165	0.762231	0.762231	0.000111965	0.1	0.99	0	0.495
432	LG5(K7)	26.002	GAA-cgtg-150	0.07	4	0.762789	0.762789	0.760643	0.760643	0.00011092	1	1	0	0.5
433	LG5(K7)	26.002	CaiSSRB03C04-180	0.07	4	0.762789	0.762789	0.760643	0.760643	0.00011092	1	1	0	0.5
434	LG5(K7)	26.002	GTA-cggt-220	0.07	4	0.762789	0.762789	0.760643	0.760643	0.00011092	1	1	0	0.5
435	LG5(K7)	26.002	LmSSR16-4F-230	0.07	4	0.762789	0.762789	0.760643	0.760643	0.00011092	1	1	0	0.5
436	LG5(K7)	26.002	CaiSSRB03C04-175	0.07	4	0.762789	0.762789	0.760643	0.760643	0.00011092	1	1	0	0.5
437	LG5(K7)	27.002		0.04	4	0.762527	0.762527	0.760911	0.760911	0.000111419	0.6	0.992	0	0.496
438	LG5(K7)	27.284	ATC-caac-100	0.03	4	0.76245	0.76245	0.761	0.761	0.000111544	0.4	1	0	0.5
439	LG5(K7)	28.284		0.03	4	0.76245	0.76245	0.761	0.761	0.000111544	0.4	0.994	0	0.497
440	LG5(K7)	28.482	LmSSRS143D2*	0.03	4	0.76245	0.76245	0.761	0.761	0.000111544	0.4	1	0	0.5
441	LG5(K7)	28.482	LmSSR2-12F-450	0.03	4	0.76245	0.76245	0.761	0.761	0.000111544	0.4	1	0	0.5
442	LG5(K7)	28.482	TAG-ctgg-180	0.03	4	0.76245	0.76245	0.761	0.761	0.000111544	0.4	1	0	0.5
443	LG5(K7)	29.088	AAT-ccgt350	0.03	4	0.76245	0.76245	0.761	0.761	0.000111544	0.4	1	0	0.5
444	LG5(K7)	30.077	AAC-ccgt450	0.08	4	0.762714	0.762714	0.760417	0.760417	0.000110824	1.1	1	0	0.5
445	LG5(K7)	31.077		0.07	4	0.76274	0.76274	0.760546	0.760546	0.000110899	1	0.942	0	0.471
446	LG5(K7)	32.077		0.06	4	0.762738	0.762738	0.7607	0.7607	0.000111033	0.9	0.99	0	0.495
447	LG5(K7)	32.166	TGA-cgga-260	0.06	4	0.762737	0.762737	0.760714	0.760714	0.000111047	0.9	1	0	0.5
448	LG5(K7)	32.742	TCT-cgtt-180	0.03	4	0.76245	0.76245	0.761	0.761	0.000111544	0.4	1	0	0.5
449	LG5(K7)	33.742		0.02	4	0.76234	0.76234	0.761132	0.761132	0.000111702	0.3	0.977	0	0.488
450	LG5(K7)	34.742		0.01	4	0.762228	0.762228	0.761279	0.761279	0.000111836	0.2	0.988	0	0.494
451	LG5(K7)	35.084	LmSSR2-12F-600	0.01	4	0.76219	0.76219	0.761333	0.761333	0.000111876	0.2	1	0	0.5
452	LG5(K7)	35.084	LmSSR7-10D	0.01	4	0.76219	0.76219	0.761333	0.761333	0.000111876	0.2	1	0	0.5
453	LG5(K7)	36.084		0.02	4	0.762307	0.762307	0.761219	0.761219	0.000111763	0.3	0.895	0	0.448
454	LG5(K7)	37.084		0.02	5	0.762428	0.762428	0.761133	0.761133	0.000111636	0.4	0.859	0	0.43
455	LG5(K7)	38.084		0.03	4	0.762543	0.762543	0.76108	0.76108	0.000111515	0.5	0.891	0	0.446
456	LG5(K7)	39.084		0.04	4	0.762642	0.762642	0.761062	0.761062	0.000111423	0.6	0.992	0	0.496
457	LG5(K7)	39.14	GTG-cgct-240	0.04	4	0.762647	0.762647	0.761062	0.761062	0.000111419	0.6	1	0	0.5
458	LG5(K7)	40.14		0.03	4	0.762593	0.762593	0.761085	0.761085	0.00011148	0.5	0.893	0	0.447
459	LG5(K7)	41.14		0.03	5	0.762519	0.762519	0.761137	0.761137	0.000111571	0.4	0.842	0	0.421
460	LG5(K7)	42.14		0.02	5	0.762428	0.762428	0.761216	0.761216	0.000111682	0.3	0.847	0	0.423
461	LG5(K7)	43.14		0.01	4	0.762326	0.762326	0.761317	0.761317	0.000111795	0.2	0.907	0	0.454
462	LG5(K7)	43.883	TTC-ccgc	0.01	4	0.762249	0.762249	0.761401	0.761401	0.000111869	0.2	0.989	0	0.494
463	LG5(K7)	44.883		0	5	0.762017	0.762017	0.761691	0.761691	0.00011202	0	0.903	0	0.451
464	LG5(K7)	45.883		0	5	0.761733	0.761733	0.762086	0.762086	0.000112016	0	0.891	0	0.445
465	LG5(K7)	46.883		0.01	4	0.761509	0.761509	0.762435	0.762435	0.00011184	0.2	0.954	0	0.477
466	LG5(K7)	47.286	TCC-cgtc-490	0.02	4	0.76145	0.76145	0.762538	0.762538	0.000111763	0.3	1	0	0.5
467	LG5(K7)	48.286		0.01	5	0.761593	0.761593	0.762324	0.762324	0.000111919	0.1	0.958	0	0.479
468	LG5(K7)	49.286		0	5	0.761779	0.761779	0.762035	0.762035	0.00011203	0	0.924	0	0.462
469	LG5(K7)	50.286		0	6	0.762023	0.762023	0.761651	0.761651	0.000112013	0	0.897	0	0.448
470	LG5(K7)	51.286		0.01	8	0.76233	0.76233	0.761162	0.761162	0.000111722	0.3	0.876	0	0.438
471	LG5(K7)	52.286		0.04	9	0.762671	0.762671	0.760616	0.760616	0.000111046	0.9	0.863	0	0.431
472	LG5(K7)	53.286		0.07	9	0.762978	0.762978	0.760115	0.760115	0.000110108	1.7	0.856	0	0.428
473	LG5(K7)	54.286		0.11	9	0.76321	0.76321	0.759724	0.759724	0.000109178	2.6	0.857	0	0.428
474	LG5(K7)	55.286		0.16	8	0.76337	0.76337	0.759438	0.759438	0.000108405	3.2	0.864	0	0.432
475	LG5(K7)	56.286		0.2	7	0.763478	0.763478	0.759231	0.759231	0.000107812	3.8	0.878	0	0.439
476	LG5(K7)	57.286		0.24	6	0.763547	0.763547	0.759079	0.759079	0.000107374	4.2	0.9	0	0.45
477	LG5(K7)	58.286		0.28	6	0.76359	0.76359	0.758966	0.758966	0.000107063	4.4	0.928	0	0.464
478	LG5(K7)	59.286		0.32	5	0.763612	0.763612	0.758883	0.758883	0.000106852	4.6	0.963	0	0.482
479	LG5(K7)	60.057	GAC-cagt-230	0.35	4	0.763619	0.763619	0.758833	0.758833	0.000106746	4.7	0.995	0	0.498
480	LG6(K7)	0	ATC-ctac-250	0.1	4	0.760674	0.760674	0.763134	0.763134	0.000110534	1.3	0.994	0	0.497
481	LG6(K7)	1		0.11	5	0.76058	0.76058	0.763235	0.763235	0.000110285	1.6	0.955	0	0.478
482	LG6(K7)	2		0.12	5	0.760486	0.760486	0.763337	0.763337	0.000110015	1.8	0.921	0	0.46
483	LG6(K7)	3		0.13	6	0.760394	0.760394	0.763437	0.763437	0.000109732	2.1	0.891	0	0.446
484	LG6(K7)	4		0.15	6	0.760306	0.760306	0.763534	0.763534	0.000109444	2.3	0.866	0	0.433
485	LG6(K7)	5		0.16	6	0.760225	0.760225	0.763626	0.763626	0.000109157	2.6	0.845	0	0.423
486	LG6(K7)	6		0.17	6	0.760152	0.760152	0.763711	0.763711	0.000108882	2.8	0.829	0	0.414
487	LG6(K7)	7		0.18	6	0.760088	0.760088	0.763789	0.763789	0.000108626	3.1	0.817	0	0.408
488	LG6(K7)	8		0.2	6	0.760033	0.760033	0.763858	0.763858	0.000108392	3.3	0.809	0	0.404
489	LG6(K7)	9		0.21	6	0.759988	0.759988	0.76392	0.76392	0.000108187	3.4	0.805	0	0.403
490	LG6(K7)	10		0.22	6	0.759953	0.759953	0.763975	0.763975	0.00010801	3.6	0.806	0	0.403
491	LG6(K7)	11		0.23	6	0.759926	0.759926	0.764022	0.764022	0.000107862	3.7	0.811	0	0.406
492	LG6(K7)	12		0.24	6	0.759908	0.759908	0.764062	0.764062	0.000107743	3.8	0.821	0	0.41
493	LG6(K7)	13		0.25	6	0.759897	0.759897	0.764096	0.764096	0.000107651	3.9	0.835	0	0.417
494	LG6(K7)	14		0.26	6	0.759893	0.759893	0.764125	0.764125	0.000107584	4	0.853	0	0.427
495	LG6(K7)	15		0.27	5	0.759894	0.759894	0.764149	0.764149	0.000107542	4	0.876	0	0.438
496	LG6(K7)	16		0.28	5	0.759902	0.759902	0.764168	0.764168	0.00010752	4	0.903	0	0.451
497	LG6(K7)	17		0.28	5	0.759914	0.759914	0.764183	0.764183	0.000107518	4	0.934	0	0.467
498	LG6(K7)	18		0.29	4	0.75993	0.75993	0.764194	0.764194	0.000107534	4	0.97	0	0.485
499	LG6(K7)	18.747	GTT-cgag-410	0.29	4	0.759944	0.759944	0.7642	0.7642	0.000107556	4	1	0	0.5
500	LG6(K7)	19.747		0.14	6	0.760534	0.760534	0.763692	0.763692	0.000109607	2.2	0.9	0	0.45
501	LG6(K7)	20.747		0.02	5	0.761371	0.761371	0.762685	0.762685	0.000111636	0.4	0.926	0	0.463
502	LG6(K7)	21.336	ATC-ccat100	0	3	0.76181	0.76181	0.762	0.762	0.000112038	0	1	0	0.5
503	LG6(K7)	22.336		0.03	5	0.762499	0.762499	0.760953	0.760953	0.000111471	0.5	0.909	0	0.455
504	LG6(K7)	23.043	LmSSR2-5G-280	0.09	4	0.762895	0.762895	0.7605	0.7605	0.000110645	1.3	1	0	0.5
505	LG6(K7)	24.043		0.04	4	0.762582	0.762582	0.760922	0.760922	0.000111374	0.6	0.932	0	0.466
506	LG6(K7)	25.043		0.01	4	0.762223	0.762223	0.761411	0.761411	0.000111885	0.1	0.956	0	0.478
507	LG6(K7)	25.519	LmSSR1-9G-170	0	4	0.762053	0.762053	0.761643	0.761643	0.000112005	0	1	0	0.5
508	LG6(K7)	26.197	ATA-cgaa140	0	3	0.761778	0.761778	0.762	0.762	0.000112034	0	1	0	0.5
509	LG6(K7)	26.197	GAC-ctac-450	0	3	0.761778	0.761778	0.762	0.762	0.000112034	0	1	0	0.5
510	LG6(K7)	27.036	TAT-cctt-140	0.09	4	0.762895	0.762895	0.7605	0.7605	0.000110645	1.3	1	0	0.5
511	LG6(K7)	27.104	LmSSR7-6H-160*	0.09	4	0.762895	0.762895	0.7605	0.7605	0.000110645	1.3	1	0	0.5
512	LG6(K7)	27.104	GTT-ctcg-170	0.09	4	0.762895	0.762895	0.7605	0.7605	0.000110645	1.3	1	0	0.5
513	LG6(K7)	27.104	ATT-ccat110	0.09	4	0.762895	0.762895	0.7605	0.7605	0.000110645	1.3	1	0	0.5
514	LG6(K7)	27.195	LmSSR11-4H-200*	0.09	4	0.762895	0.762895	0.7605	0.7605	0.000110645	1.3	1	0	0.5
515	LG6(K7)	28.195		0.05	4	0.762686	0.762686	0.760834	0.760834	0.000111202	0.8	0.965	0	0.483
516	LG6(K7)	29.195		0.02	4	0.762425	0.762425	0.76121	0.76121	0.00011168	0.3	0.983	0	0.491
517	LG6(K7)	29.524	CaiSSRB04O03-290	0.02	4	0.762333	0.762333	0.761333	0.761333	0.000111798	0.2	1	0	0.5
518	LG6(K7)	29.524	ATG-caag-170	0.02	4	0.762333	0.762333	0.761333	0.761333	0.000111798	0.2	1	0	0.5
519	LG6(K7)	30.524		0.02	4	0.762333	0.762333	0.761333	0.761333	0.000111798	0.2	0.998	0	0.499
520	LG6(K7)	30.575	AAC-cacc-550	0.02	4	0.762333	0.762333	0.761333	0.761333	0.000111798	0.2	1	0	0.5
521	LG6(K7)	31.575		0.02	4	0.762333	0.762333	0.761333	0.761333	0.000111798	0.2	0.955	0	0.478
522	LG6(K7)	32.218	CaiSSRB04O03-300	0.02	4	0.762333	0.762333	0.761333	0.761333	0.000111798	0.2	1	0	0.5
523	LG6(K7)	33.218		0	3	0.761909	0.761909	0.761847	0.761847	0.000112045	0	0.92	0	0.46
524	LG6(K7)	33.94	ATG-caag-165	0.01	4	0.761562	0.761562	0.762176	0.762176	0.000111952	0.1	1	0	0.5
525	LG6(K7)	34.94		0	3	0.761953	0.761953	0.761787	0.761787	0.000112039	0	0.932	0	0.466
526	LG6(K7)	35.252	CaiSSRB08C21-150	0	4	0.762053	0.762053	0.761643	0.761643	0.000112005	0	1	0	0.5
527	LG6(K7)	36.252		0	4	0.762053	0.762053	0.761643	0.761643	0.000112005	0	0.954	0	0.477
528	LG6(K7)	37.252		0	4	0.762053	0.762053	0.761643	0.761643	0.000112005	0	0.978	0	0.489
529	LG6(K7)	37.556	TCG-cgtg-210	0	4	0.762053	0.762053	0.761643	0.761643	0.000112005	0	1	0	0.5
530	LG6(K7)	38.556		0	4	0.762053	0.762053	0.761643	0.761643	0.000112005	0	0.946	0	0.473
531	LG6(K7)	39.556		0	4	0.762053	0.762053	0.761643	0.761643	0.000112005	0	0.929	0	0.464
532	LG6(K7)	40.556		0	4	0.762053	0.762053	0.761643	0.761643	0.000112005	0	0.947	0	0.473
533	LG6(K7)	41.545	ATC-ctac-600	0	4	0.762053	0.762053	0.761643	0.761643	0.000112005	0	1	0	0.5
534	LG6(K7)	42.545		0	4	0.762053	0.762053	0.761643	0.761643	0.000112005	0	0.994	0	0.497
535	LG6(K7)	42.734	ATA-ctaa-220	0	4	0.762053	0.762053	0.761643	0.761643	0.000112005	0	1	0	0.5
536	LG6(K7)	43.734		0	3	0.761899	0.761899	0.761851	0.761851	0.000112045	0	0.961	0	0.48
537	LG6(K7)	44.734		0	4	0.761727	0.761727	0.76209	0.76209	0.000112014	0	0.931	0	0.465
538	LG6(K7)	45.734		0.01	5	0.761544	0.761544	0.762354	0.762354	0.000111887	0.1	0.911	0	0.456
539	LG6(K7)	46.734		0.02	5	0.761361	0.761361	0.762629	0.762629	0.000111657	0.3	0.901	0	0.45
540	LG6(K7)	47.734		0.04	6	0.761188	0.761188	0.762898	0.762898	0.000111342	0.6	0.901	0	0.45
541	LG6(K7)	48.734		0.06	6	0.761034	0.761034	0.763143	0.763143	0.000110978	1	0.91	0	0.455
542	LG6(K7)	49.734		0.08	5	0.760904	0.760904	0.763356	0.763356	0.000110606	1.3	0.929	0	0.464
543	LG6(K7)	50.734		0.11	5	0.760796	0.760796	0.763534	0.763534	0.000110253	1.6	0.957	0	0.479
544	LG6(K7)	51.734		0.14	4	0.760707	0.760707	0.76368	0.76368	0.000109935	1.9	0.996	0	0.498
545	LG6(K7)	51.825	TAT-ccaa-180	0.14	4	0.7607	0.7607	0.763692	0.763692	0.000109908	1.9	1	0	0.5
546	LG6(K7)	52.825		0.23	6	0.760225	0.760225	0.764327	0.764327	0.000107997	3.6	0.963	0	0.481
547	LG6(K7)	53.825		0.36	7	0.759711	0.759711	0.764958	0.764958	0.00010537	6	0.936	0	0.468
548	LG6(K7)	54.825		0.51	7	0.759242	0.759242	0.765503	0.765503	0.000102489	8.5	0.919	0	0.459
549	LG6(K7)	55.825		0.67	7	0.758872	0.758872	0.765929	0.765929	9.9869e-05	10.9	0.912	0	0.456
550	LG6(K7)	56.825		0.83	7	0.758602	0.758602	0.766255	0.766255	9.77088e-05	12.8	0.916	0	0.458
551	LG6(K7)	57.825		0.99	6	0.758411	0.758411	0.76651	0.76651	9.59839e-05	14.3	0.93	0	0.465
552	LG6(K7)	58.825		1.14	5	0.758275	0.758275	0.766717	0.766717	9.46099e-05	15.6	0.955	0	0.477
553	LG6(K7)	59.825		1.28	5	0.758178	0.758178	0.766888	0.766888	9.35091e-05	16.5	0.989	0	0.495
554	LG6(K7)	60.089	CaiSSRA03M16-170	1.32	4	0.758158	0.758158	0.766929	0.766929	9.32562e-05	16.8	1	0	0.5
555	LG6(K7)	61.089		1.4	8	0.75768	0.75768	0.767339	0.767339	8.91186e-05	20.5	0.945	0	0.472
556	LG6(K7)	62.089		1.44	8	0.757458	0.757458	0.767521	0.767521	8.71056e-05	22.3	0.899	0	0.449
557	LG6(K7)	63.089		1.44	8	0.757402	0.757402	0.76756	0.76756	8.66119e-05	22.7	0.862	0	0.431
558	LG6(K7)	64.089		1.4	8	0.757426	0.757426	0.767524	0.767524	8.69077e-05	22.4	0.833	0	0.416
559	LG6(K7)	65.089		1.35	8	0.757497	0.757497	0.767439	0.767439	8.76819e-05	21.7	0.813	0	0.407
560	LG6(K7)	66.089		1.29	8	0.757603	0.757603	0.767314	0.767314	8.88064e-05	20.7	0.802	0	0.401
561	LG6(K7)	67.089		1.21	8	0.757741	0.757741	0.767154	0.767154	9.02191e-05	19.5	0.799	0	0.4
562	LG6(K7)	68.089		1.12	8	0.75791	0.75791	0.76696	0.76696	9.18774e-05	18	0.805	0	0.403
563	LG6(K7)	69.089		1.03	7	0.758108	0.758108	0.766734	0.766734	9.37355e-05	16.3	0.82	0	0.41
564	LG6(K7)	70.089		0.94	7	0.758333	0.758333	0.76648	0.76648	9.57303e-05	14.6	0.844	0	0.422
565	LG6(K7)	71.089		0.84	7	0.758581	0.758581	0.766203	0.766203	9.77831e-05	12.7	0.876	0	0.438
566	LG6(K7)	72.089		0.75	6	0.758842	0.758842	0.765909	0.765909	9.9805e-05	10.9	0.917	0	0.458
567	LG6(K7)	73.089		0.67	5	0.759108	0.759108	0.765608	0.765608	0.000101713	9.2	0.966	0	0.483
568	LG6(K7)	73.68	CaiSSRb101	0.62	4	0.759263	0.759263	0.765429	0.765429	0.000102761	8.3	1	0	0.5
569	LG6(K7)	74.68		0.73	5	0.759025	0.759025	0.765805	0.765805	0.000100842	10	0.963	0	0.482
570	LG6(K7)	75.68		0.84	6	0.758811	0.758811	0.766167	0.766167	9.88911e-05	11.7	0.936	0	0.468
571	LG6(K7)	76.68		0.96	6	0.758626	0.758626	0.766504	0.766504	9.70017e-05	13.4	0.919	0	0.46
572	LG6(K7)	77.68		1.08	6	0.758471	0.758471	0.766811	0.766811	9.52414e-05	15	0.912	0	0.456
573	LG6(K7)	78.68		1.21	6	0.758343	0.758343	0.767083	0.767083	9.36482e-05	16.4	0.915	0	0.458
574	LG6(K7)	79.68		1.33	6	0.758238	0.758238	0.76732	0.76732	9.22352e-05	17.7	0.928	0	0.464
575	LG6(K7)	80.68		1.44	5	0.758151	0.758151	0.767525	0.767525	9.09984e-05	18.8	0.95	0	0.475
576	LG6(K7)	81.68		1.56	5	0.758078	0.758078	0.7677	0.7677	8.99245e-05	19.7	0.982	0	0.491
577	LG6(K7)	82.127	ATA-cctt170	1.61	4	0.75805	0.75805	0.767769	0.767769	8.94927e-05	20.1	1	0	0.5
578	LG7(K7)	0	TAA-caga-320	0.01	4	0.761222	0.761222	0.762125	0.762125	0.000111884	0.1	1	0	0.5
579	LG7(K7)	1		0	4	0.761748	0.761748	0.761934	0.761934	0.000112039	0	0.871	0	0.435
580	LG7(K7)	2		0	4	0.762231	0.762231	0.761711	0.761711	0.000111987	0.1	0.837	0	0.419
581	LG7(K7)	3		0.02	4	0.762624	0.762624	0.761483	0.761483	0.000111751	0.3	0.9	0	0.45
582	LG7(K7)	3.696	CaiSSRB06D01	0.03	4	0.762833	0.762833	0.761333	0.761333	0.000111525	0.5	1	0	0.5
583	LG7(K7)	4.696		0.04	5	0.76294	0.76294	0.761241	0.761241	0.000111369	0.6	0.932	0	0.466
584	LG7(K7)	5.696		0.05	5	0.763017	0.763017	0.761159	0.761159	0.000111227	0.7	0.897	0	0.449
585	LG7(K7)	6.696		0.05	5	0.763054	0.763054	0.761098	0.761098	0.000111128	0.8	0.897	0	0.449
586	LG7(K7)	7.696		0.06	5	0.763047	0.763047	0.761062	0.761062	0.000111091	0.9	0.932	0	0.466
587	LG7(K7)	8.691	GAC-cccc-190	0.06	4	0.763	0.763	0.761053	0.761053	0.00011112	0.8	1	0	0.5
588	LG7(K7)	9.562	TAT-ctat-160	0.04	4	0.762846	0.762846	0.76125	0.76125	0.000111438	0.5	1	0	0.5
589	LG7(K7)	10.34	GAT-cggt-190	0.01	4	0.7622	0.7622	0.761611	0.761611	0.00011196	0.1	1	0	0.5
590	LG7(K7)	11.003	AAA-caca-130	0.09	4	0.763417	0.763417	0.761	0.761	0.000110694	1.2	1	0	0.5
591	LG7(K7)	11.082	TTT-ccca-230	0.09	4	0.763417	0.763417	0.761	0.761	0.000110694	1.2	1	0	0.5
592	LG7(K7)	11.323	TTG-cgta-110	0.09	4	0.763417	0.763417	0.761	0.761	0.000110694	1.2	1	0	0.5
593	LG7(K7)	11.793	LmSSR9-9G	0.04	4	0.762846	0.762846	0.76125	0.76125	0.000111438	0.5	1	0	0.5
594	LG7(K7)	12.359	GTG-ccag-270	0.09	4	0.763417	0.763417	0.761	0.761	0.000110694	1.2	1	0	0.5
595	LG7(K7)	12.359	CaiSSRB01P02	0.09	4	0.763417	0.763417	0.761	0.761	0.000110694	1.2	1	0	0.5
596	LG7(K7)	13.258	TTT-cgtc-300	0.05	4	0.762923	0.762923	0.7612	0.7612	0.000111337	0.6	1	0	0.5
597	LG7(K7)	13.258	LmSSR17-8D-280	0.05	4	0.762923	0.762923	0.7612	0.7612	0.000111337	0.6	1	0	0.5
598	LG7(K7)	13.721	LmSSRFL33A9*	0.05	4	0.762923	0.762923	0.7612	0.7612	0.000111337	0.6	1	0	0.5
599	LG7(K7)	13.727	LmSSR10-12D-270	0.05	4	0.762923	0.762923	0.7612	0.7612	0.000111337	0.6	1	0	0.5
600	LG7(K7)	13.874	TTA-ccct	0.05	4	0.762923	0.762923	0.7612	0.7612	0.000111337	0.6	1	0	0.5
601	LG7(K7)	14.133	LmSSR10-12D-280	0.09	4	0.763417	0.763417	0.761	0.761	0.000110694	1.2	1	0	0.5
602	LG7(K7)	14.991	LmSSR11-2E-450	0.3	4	0.764357	0.764357	0.760053	0.760053	0.00010752	4	1	0	0.5
603	LG7(K7)	15.355	CaiSSRA01A09-220	0.2	4	0.7638	0.7638	0.760278	0.760278	0.00010897	2.7	1	0	0.5
604	LG7(K7)	15.758	TTC-cccg-190	0.01	4	0.762429	0.762429	0.761474	0.761474	0.000111823	0.2	1	0	0.5
605	LG7(K7)	16.758		0.18	5	0.763814	0.763814	0.760316	0.760316	0.000109022	2.7	0.937	0	0.468
606	LG7(K7)	17.284	ATC-cgct380	0.29	4	0.7642	0.7642	0.759944	0.759944	0.000107556	4	1	0	0.5
607	LG7(K7)	18.284		0.29	4	0.764297	0.764297	0.760014	0.760014	0.000107536	4	0.967	0	0.484
608	LG7(K7)	18.878	TAC-cctc-280	0.3	4	0.764357	0.764357	0.760053	0.760053	0.00010752	4	1	0	0.5
609	LG7(K7)	19.878		0.3	4	0.764357	0.764357	0.760053	0.760053	0.00010752	4	0.994	0	0.497
610	LG7(K7)	20.069	CaiSSRB01J02-310	0.3	4	0.764357	0.764357	0.760053	0.760053	0.00010752	4	1	0	0.5
611	LG7(K7)	21.069		0.38	7	0.765194	0.765194	0.759581	0.759581	0.000104428	6.8	0.87	0	0.435
612	LG7(K7)	22.069		0.35	7	0.765019	0.765019	0.759756	0.759756	0.000105381	5.9	0.89	0	0.445
613	LG7(K7)	22.799	LmSSRT132E-110*	0.27	4	0.764385	0.764385	0.76025	0.76025	0.000107964	3.6	1	0	0.5
614	LG7(K7)	23.799		0.27	8	0.764768	0.764768	0.759826	0.759826	0.000106116	5.3	0.839	0	0.42
615	LG7(K7)	24.799		0.15	6	0.763728	0.763728	0.760403	0.760403	0.000109317	2.4	0.928	0	0.464
616	LG7(K7)	25.088	TTG-cccc	0.11	4	0.763333	0.763333	0.760667	0.760667	0.000110283	1.6	1	0	0.5
617	LG7(K7)	26.088		0.12	4	0.763407	0.763407	0.760612	0.760612	0.00011011	1.7	0.952	0	0.476
618	LG7(K7)	27.088		0.13	4	0.763468	0.763468	0.760564	0.760564	0.000109956	1.9	0.942	0	0.471
619	LG7(K7)	28.088		0.14	4	0.763515	0.763515	0.760521	0.760521	0.000109825	2	0.969	0	0.485
620	LG7(K7)	28.628	LmSSRS363H7*	0.15	4	0.763533	0.763533	0.7605	0.7605	0.000109765	2	1	0	0.5
621	LG7(K7)	29.628		0.15	5	0.763606	0.763606	0.760478	0.760478	0.000109626	2.2	0.919	0	0.459
622	LG7(K7)	30.628		0.15	5	0.763664	0.763664	0.760467	0.760467	0.000109526	2.2	0.857	0	0.428
623	LG7(K7)	31.628		0.15	5	0.763706	0.763706	0.76047	0.76047	0.000109472	2.3	0.814	0	0.407
624	LG7(K7)	32.628		0.15	5	0.76373	0.76373	0.760487	0.760487	0.00010947	2.3	0.789	0	0.395
625	LG7(K7)	33.628		0.15	5	0.763735	0.763735	0.760518	0.760518	0.00010952	2.3	0.784	0	0.392
626	LG7(K7)	34.628		0.14	5	0.763722	0.763722	0.760562	0.760562	0.00010962	2.2	0.797	0	0.399
627	LG7(K7)	35.628		0.13	5	0.76369	0.76369	0.760618	0.760618	0.000109762	2	0.829	0	0.415
628	LG7(K7)	36.628		0.13	5	0.763642	0.763642	0.760683	0.760683	0.000109937	1.9	0.88	0	0.44
629	LG7(K7)	37.628		0.12	4	0.76358	0.76358	0.760755	0.760755	0.000110135	1.7	0.95	0	0.475
630	LG7(K7)	38.211	CaiSSRB08L24	0.12	4	0.763538	0.763538	0.7608	0.7608	0.000110255	1.6	1	0	0.5
631	LG7(K7)	39.211		0.14	5	0.763747	0.763747	0.760578	0.760578	0.000109616	2.2	0.838	0	0.419
632	LG7(K7)	40.211		0.17	6	0.763911	0.763911	0.760369	0.760369	0.000108976	2.7	0.74	0	0.37
633	LG7(K7)	41.211		0.2	6	0.764012	0.764012	0.760194	0.760194	0.000108452	3.2	0.705	0	0.353
634	LG7(K7)	42.211		0.22	6	0.76404	0.76404	0.760071	0.760071	0.000108139	3.5	0.734	0	0.367
635	LG7(K7)	43.211		0.24	5	0.763994	0.763994	0.760006	0.760006	0.000108084	3.5	0.826	0	0.413
636	LG7(K7)	44.211		0.24	4	0.763887	0.763887	0.759998	0.759998	0.00010827	3.4	0.981	0	0.491
637	LG7(K7)	44.296	TAC-cagc-110	0.24	4	0.763875	0.763875	0.76	0.76	0.000108295	3.3	0.997	0	0.499
638	LG1(N4)	0	LmSSR16-6G-250	0.02	4	0.761421	0.7625	0.761421	0.7625	0.000111762	0.3	0	1	0.5
639	LG1(N4)	1		0.02	5	0.76134	0.762589	0.76134	0.762589	0.000111664	0.3	0	0.95	0.475
640	LG1(N4)	2		0.03	5	0.761251	0.762682	0.761251	0.762682	0.000111542	0.4	0	0.906	0.453
641	LG1(N4)	3		0.03	6	0.761155	0.762777	0.761155	0.762777	0.000111396	0.6	0	0.868	0.434
642	LG1(N4)	4		0.04	6	0.761054	0.762873	0.761054	0.762873	0.000111225	0.7	0	0.836	0.418
643	LG1(N4)	5		0.05	7	0.760949	0.762967	0.760949	0.762967	0.000111034	0.9	0	0.81	0.405
644	LG1(N4)	6		0.06	7	0.760845	0.763056	0.760845	0.763056	0.000110829	1.1	0	0.79	0.395
645	LG1(N4)	7		0.06	7	0.760743	0.763135	0.760743	0.763135	0.000110619	1.3	0	0.777	0.388
646	LG1(N4)	8		0.07	8	0.760648	0.763204	0.760648	0.763204	0.000110415	1.5	0	0.769	0.384
647	LG1(N4)	9		0.08	8	0.760562	0.763258	0.760562	0.763258	0.00011023	1.6	0	0.767	0.383
648	LG1(N4)	10		0.09	8	0.760489	0.763297	0.760489	0.763297	0.000110075	1.8	0	0.77	0.385
649	LG1(N4)	11		0.1	8	0.760429	0.76332	0.760429	0.76332	0.000109957	1.9	0	0.78	0.39
650	LG1(N4)	12		0.1	7	0.760384	0.763327	0.760384	0.763327	0.000109882	1.9	0	0.796	0.398
651	LG1(N4)	13		0.11	7	0.760355	0.763317	0.760355	0.763317	0.000109854	2	0	0.818	0.409
652	LG1(N4)	14		0.11	7	0.760341	0.763294	0.760341	0.763294	0.00010987	1.9	0	0.845	0.423
653	LG1(N4)	15		0.11	6	0.760341	0.763257	0.760341	0.763257	0.000109927	1.9	0	0.879	0.44
654	LG1(N4)	16		0.12	5	0.760354	0.763209	0.760354	0.763209	0.000110018	1.8	0	0.919	0.46
655	LG1(N4)	17		0.12	5	0.760378	0.763153	0.760378	0.763153	0.000110134	1.7	0	0.965	0.483
656	LG1(N4)	17.681	TTA-ccga-500	0.12	4	0.7604	0.763111	0.7604	0.763111	0.000110224	1.6	0	1	0.5
657	LG1(N4)	18.681		0.15	7	0.760057	0.763521	0.760057	0.763521	0.000109054	2.7	0	0.941	0.47
658	LG1(N4)	19.681		0.16	7	0.760042	0.763646	0.760042	0.763646	0.0001088	2.9	0	0.932	0.466
659	LG1(N4)	20.681		0.14	5	0.760375	0.763434	0.760375	0.763434	0.000109708	2.1	0	0.974	0.487
660	LG1(N4)	21.015	GTA-ccaa-170	0.12	4	0.760529	0.763312	0.760529	0.763312	0.000110111	1.7	0	1	0.5
661	LG1(N4)	22.015		0.16	5	0.760283	0.763579	0.760283	0.763579	0.000109332	2.4	0	0.946	0.473
662	LG1(N4)	23.015		0.2	6	0.760058	0.763828	0.760058	0.763828	0.000108496	3.2	0	0.908	0.454
663	LG1(N4)	24.015		0.23	6	0.759882	0.764035	0.759882	0.764035	0.000107742	3.8	0	0.885	0.443
664	LG1(N4)	25.015		0.27	6	0.759767	0.76419	0.759767	0.76419	0.000107165	4.4	0	0.878	0.439
665	LG1(N4)	26.015		0.3	6	0.759708	0.764298	0.759708	0.764298	0.000106793	4.7	0	0.887	0.443
666	LG1(N4)	27.015		0.32	6	0.759696	0.764365	0.759696	0.764365	0.000106619	4.8	0	0.911	0.456
667	LG1(N4)	28.015		0.34	5	0.759724	0.764397	0.759724	0.764397	0.000106621	4.8	0	0.951	0.475
668	LG1(N4)	28.913	CaiSSRB01A19-140	0.35	4	0.759778	0.7644	0.759778	0.7644	0.000106749	4.7	0	1	0.5
669	LG1(N4)	29.913		0.32	4	0.759812	0.764291	0.759812	0.764291	0.000107059	4.5	0	0.944	0.472
670	LG1(N4)	30.913		0.3	4	0.759853	0.764171	0.759853	0.764171	0.000107402	4.1	0	0.929	0.465
671	LG1(N4)	31.913		0.28	4	0.759901	0.76404	0.759901	0.76404	0.000107771	3.8	0	0.955	0.477
672	LG1(N4)	32.652	LmSSR16-6G-180	0.26	4	0.759941	0.763937	0.759941	0.763937	0.000108057	3.6	0	1	0.5
673	LG1(N4)	33.652		0.39	5	0.759393	0.764441	0.759393	0.764441	0.000105676	5.7	0	0.911	0.455
674	LG1(N4)	34.652		0.52	5	0.758993	0.764697	0.758993	0.764697	0.000103912	7.3	0	0.936	0.468
675	LG1(N4)	35.219	TAA-caga-590	0.59	4	0.758813	0.764765	0.758813	0.764765	0.000103197	7.9	0	1	0.5
676	LG1(N4)	36.219		0.57	5	0.758774	0.764753	0.758774	0.764753	0.000103121	8	0	0.953	0.476
677	LG1(N4)	37.219		0.54	6	0.758772	0.764708	0.758772	0.764708	0.000103257	7.8	0	0.921	0.46
678	LG1(N4)	38.219		0.5	6	0.758817	0.764622	0.758817	0.764622	0.000103646	7.5	0	0.905	0.452
679	LG1(N4)	39.219		0.45	6	0.758918	0.764488	0.758918	0.764488	0.000104319	6.9	0	0.904	0.452
680	LG1(N4)	40.219		0.4	6	0.759082	0.764301	0.759082	0.764301	0.000105272	6	0	0.919	0.46
681	LG1(N4)	41.219		0.34	5	0.75931	0.764064	0.75931	0.764064	0.000106431	5	0	0.95	0.475
682	LG1(N4)	42.219		0.29	4	0.759584	0.763794	0.759584	0.763794	0.000107651	3.9	0	0.997	0.498
683	LG1(N4)	42.276	TAC-ccag-50	0.28	4	0.7596	0.763778	0.7596	0.763778	0.000107719	3.9	0	1	0.5
684	LG1(N4)	43.276		0.24	4	0.759793	0.763669	0.759793	0.763669	0.000108312	3.3	0	0.917	0.458
685	LG1(N4)	44.276		0.2	5	0.760006	0.763534	0.760006	0.763534	0.000108946	2.8	0	0.883	0.441
686	LG1(N4)	45.276		0.15	4	0.760235	0.763372	0.760235	0.763372	0.000109592	2.2	0	0.899	0.449
687	LG1(N4)	46.276		0.12	4	0.760475	0.763188	0.760475	0.763188	0.000110208	1.6	0	0.964	0.482
688	LG1(N4)	46.638	CaiSSRB06A04-230	0.11	4	0.760562	0.763118	0.760562	0.763118	0.000110415	1.5	0	1	0.5
689	LG1(N4)	47.638		0.11	4	0.760562	0.763118	0.760562	0.763118	0.000110414	1.5	0	0.943	0.471
690	LG1(N4)	48.638		0.11	4	0.760562	0.763118	0.760562	0.763118	0.000110415	1.5	0	0.971	0.486
691	LG1(N4)	48.972	LmSSR16-2F	0.11	4	0.760562	0.763118	0.760562	0.763118	0.000110415	1.5	0	1	0.5
692	LG1(N4)	49.972		0.11	4	0.760562	0.763118	0.760562	0.763118	0.000110414	1.5	0	0.965	0.482
693	LG1(N4)	50.972		0.11	4	0.760562	0.763118	0.760562	0.763118	0.000110415	1.5	0	0.987	0.494
694	LG1(N4)	51.195	CaiSSRB06A04-200	0.11	4	0.760562	0.763118	0.760562	0.763118	0.000110415	1.5	0	1	0.5
695	LG1(N4)	52.195		0.11	4	0.760562	0.763118	0.760562	0.763118	0.000110414	1.5	0	0.965	0.482
696	LG1(N4)	53.155	LmSSRpre8*	0.11	4	0.760562	0.763118	0.760562	0.763118	0.000110415	1.5	0	1	0.5
697	LG1(N4)	53.155	ATC-cgct250	0.11	4	0.760562	0.763118	0.760562	0.763118	0.000110415	1.5	0	1	0.5
698	LG1(N4)	54.155		0.11	4	0.760562	0.763118	0.760562	0.763118	0.000110415	1.5	0	0.954	0.477
699	LG1(N4)	54.995	GAT-ctat-190	0.11	4	0.760562	0.763118	0.760562	0.763118	0.000110415	1.5	0	1	0.5
700	LG1(N4)	55.995		0.06	5	0.7608	0.762909	0.7608	0.762909	0.000110935	1	0	0.924	0.462
701	LG1(N4)	56.995		0.02	5	0.761211	0.762513	0.761211	0.762513	0.000111623	0.4	0	0.934	0.467
702	LG1(N4)	57.757	CaiSSRD09J21-160	0.01	4	0.761562	0.762176	0.761562	0.762176	0.000111952	0.1	0	1	0.5
703	LG1(N4)	58.757		0.04	5	0.761038	0.762752	0.761038	0.762752	0.000111311	0.7	0	0.924	0.462
704	LG1(N4)	59.757		0.1	5	0.760649	0.763276	0.760649	0.763276	0.000110328	1.5	0	0.936	0.468
705	LG1(N4)	60.471	TCT-catt-150	0.15	4	0.7605	0.763533	0.7605	0.763533	0.000109765	2	0	1	0.5
706	LG1(N4)	61.331	CaiSSRB02M22-310	0.17	4	0.760294	0.763562	0.760294	0.763562	0.000109378	2.4	0	1	0.5
707	LG1(N4)	61.331	CaiSSRB02M22-290	0.17	4	0.760294	0.763562	0.760294	0.763562	0.000109378	2.4	0	1	0.5
708	LG1(N4)	61.331	CaiSSRD03H10-250	0.17	4	0.760294	0.763562	0.760294	0.763562	0.000109378	2.4	0	1	0.5
709	LG1(N4)	62.331		0.01	4	0.761521	0.762307	0.761521	0.762307	0.000111893	0.1	0	0.999	0.499
710	LG1(N4)	62.357	GCT-cgct-500	0.01	4	0.761556	0.762267	0.761556	0.762267	0.000111921	0.1	0	1	0.5
711	LG1(N4)	63.357		0.09	5	0.760671	0.763137	0.760671	0.763137	0.000110526	1.4	0	0.953	0.477
712	LG1(N4)	64.282	AGC-cgat210	0.2	4	0.760062	0.763588	0.760062	0.763588	0.000108941	2.8	0	1	0.5
713	LG1(N4)	65.147	ATA-cgaa150	0.2	4	0.760062	0.763588	0.760062	0.763588	0.000108941	2.8	0	1	0.5
714	LG1(N4)	66.147		0.09	6	0.760623	0.763129	0.760623	0.763129	0.000110476	1.4	0	0.893	0.446
715	LG1(N4)	67.147		0.01	6	0.761429	0.762366	0.761429	0.762366	0.000111827	0.2	0	0.852	0.426
716	LG1(N4)	68.147		0.01	5	0.762268	0.761416	0.762268	0.761416	0.000111866	0.2	0	0.877	0.439
717	LG1(N4)	69.147		0.07	4	0.762842	0.760651	0.762842	0.760651	0.000110864	1.1	0	0.97	0.485
718	LG1(N4)	69.293	GCT-cgct-110	0.09	4	0.762903	0.760562	0.762903	0.760562	0.000110697	1.2	0	0.989	0.494
719	LG1(N4)	70.293		0.06	5	0.762809	0.760756	0.762809	0.760756	0.000111002	0.9	0	0.879	0.439
720	LG1(N4)	71.293		0.04	6	0.762644	0.76102	0.762644	0.76102	0.000111389	0.6	0	0.817	0.408
721	LG1(N4)	72.293		0.02	6	0.762407	0.761332	0.762407	0.761332	0.000111757	0.3	0	0.803	0.401
722	LG1(N4)	73.293		0	5	0.762124	0.761646	0.762124	0.761646	0.000111989	0.1	0	0.837	0.418
723	LG1(N4)	74.293		0	4	0.761839	0.761914	0.761839	0.761914	0.000112045	0	0	0.918	0.459
724	LG1(N4)	74.964	TTC-cgtc-150	0	3	0.761667	0.762056	0.761667	0.762056	0.000112008	0	0	1	0.5
725	LG1(N4)	75.964		0	4	0.761671	0.762045	0.761671	0.762045	0.000112011	0	0	0.93	0.465
726	LG1(N4)	76.964		0	5	0.761687	0.762026	0.761687	0.762026	0.000112018	0	0	0.887	0.443
727	LG1(N4)	77.964		0	5	0.761715	0.762	0.761715	0.762	0.000112026	0	0	0.869	0.434
728	LG1(N4)	78.964		0	5	0.761752	0.761969	0.761752	0.761969	0.000112034	0	0	0.877	0.439
729	LG1(N4)	79.964		0	4	0.761793	0.761938	0.761793	0.761938	0.000112041	0	0	0.912	0.456
730	LG1(N4)	80.964		0	3	0.761833	0.761909	0.761833	0.761909	0.000112045	0	0	0.973	0.486
731	LG1(N4)	81.312	ATA-ccat170	0	3	0.761846	0.7619	0.761846	0.7619	0.000112045	0	0	1	0.5
732	LG2(N4)	0	GAT-cggc	0.11	4	0.760231	0.76295	0.760231	0.76295	0.000110281	1.6	0	1	0.5
733	LG2(N4)	1		0.11	4	0.760318	0.762959	0.760318	0.762959	0.00011036	1.5	0	0.94	0.47
734	LG2(N4)	2		0.1	4	0.760401	0.762967	0.760401	0.762967	0.000110437	1.4	0	0.904	0.452
735	LG2(N4)	3		0.1	4	0.76048	0.762976	0.76048	0.762976	0.000110511	1.4	0	0.892	0.446
736	LG2(N4)	4		0.09	4	0.760555	0.762984	0.760555	0.762984	0.000110582	1.3	0	0.905	0.453
737	LG2(N4)	5		0.09	4	0.760625	0.762992	0.760625	0.762992	0.00011065	1.2	0	0.943	0.472
738	LG2(N4)	5.928	LmSSR2-12F-300	0.09	4	0.760687	0.763	0.760687	0.763	0.00011071	1.2	0	1	0.5
739	LG2(N4)	6.928		0.09	4	0.76064	0.763014	0.76064	0.763014	0.00011064	1.3	0	0.967	0.484
740	LG2(N4)	7.928		0.09	4	0.760593	0.763026	0.760593	0.763026	0.000110571	1.3	0	0.952	0.476
741	LG2(N4)	8.928		0.1	4	0.760546	0.763038	0.760546	0.763038	0.000110501	1.4	0	0.955	0.478
742	LG2(N4)	9.928		0.1	4	0.760499	0.763049	0.760499	0.763049	0.000110432	1.4	0	0.975	0.488
743	LG2(N4)	10.623	TAT-cagt-300	0.11	4	0.760467	0.763056	0.760467	0.763056	0.000110384	1.5	0	1	0.5
744	LG2(N4)	11.623		0.11	4	0.760467	0.763056	0.760467	0.763056	0.000110384	1.5	0	0.996	0.498
745	LG2(N4)	11.664	GCG-cgcg-210	0.11	4	0.760467	0.763056	0.760467	0.763056	0.000110384	1.5	0	1	0.5
746	LG2(N4)	12.664		0.11	4	0.760466	0.763056	0.760466	0.763056	0.000110382	1.5	0	0.967	0.484
747	LG2(N4)	13.664		0.11	4	0.760465	0.763057	0.760465	0.763057	0.000110381	1.5	0	0.952	0.476
748	LG2(N4)	14.664		0.11	4	0.760465	0.763057	0.760465	0.763057	0.000110381	1.5	0	0.955	0.478
749	LG2(N4)	15.664		0.11	4	0.760466	0.763056	0.760466	0.763056	0.000110383	1.5	0	0.976	0.488
750	LG2(N4)	16.322	ATC-cggt80	0.11	4	0.760467	0.763056	0.760467	0.763056	0.000110384	1.5	0	1	0.5
751	LG2(N4)	17.322		0.1	4	0.760571	0.763017	0.760571	0.763017	0.000110558	1.3	0	0.978	0.489
752	LG2(N4)	18.322		0.08	4	0.760677	0.762974	0.760677	0.762974	0.00011073	1.2	0	0.982	0.491
753	LG2(N4)	19.016	GAG-cacc-260	0.08	4	0.76075	0.762941	0.76075	0.762941	0.000110847	1.1	0	1	0.5
754	LG2(N4)	19.016	GTT-cgag-180	0.08	4	0.76075	0.762941	0.76075	0.762941	0.000110847	1.1	0	1	0.5
755	LG2(N4)	20.016		0.08	4	0.76075	0.762941	0.76075	0.762941	0.000110847	1.1	0	0.991	0.496
756	LG2(N4)	20.358	ATA-cctt160	0.08	4	0.76075	0.762941	0.76075	0.762941	0.000110847	1.1	0	1	0.5
757	LG2(N4)	21.358		0.09	4	0.760643	0.763042	0.760643	0.763042	0.000110608	1.3	0	0.967	0.483
758	LG2(N4)	22.358		0.11	4	0.760538	0.763142	0.760538	0.763142	0.000110353	1.5	0	0.943	0.472
759	LG2(N4)	23.358		0.12	4	0.760436	0.763238	0.760436	0.763238	0.000110085	1.7	0	0.929	0.465
760	LG2(N4)	24.358		0.14	4	0.760338	0.76333	0.760338	0.76333	0.00010981	2	0	0.924	0.462
761	LG2(N4)	25.358		0.16	4	0.760245	0.763418	0.760245	0.763418	0.000109532	2.2	0	0.929	0.465
762	LG2(N4)	26.358		0.18	4	0.760157	0.7635	0.760157	0.7635	0.000109255	2.5	0	0.943	0.472
763	LG2(N4)	27.358		0.2	4	0.760075	0.763577	0.760075	0.763577	0.000108984	2.7	0	0.967	0.483
764	LG2(N4)	28.354	AGT-cgat250	0.22	4	0.76	0.763647	0.76	0.763647	0.000108724	3	0	1	0.5
765	LG2(N4)	28.354	LmSSR9-7G-140*	0.22	4	0.76	0.763647	0.76	0.763647	0.000108724	3	0	1	0.5
766	LG2(N4)	29.354		0.53	5	0.758699	0.764564	0.758699	0.764564	0.000103507	7.6	0	0.991	0.495
767	LG2(N4)	29.732	LmSSR11-4H120*	0.62	4	0.758533	0.764667	0.758533	0.764667	0.000102719	8.3	0	1	0.5
768	LG2(N4)	30.732		0.6	4	0.758545	0.76461	0.758545	0.76461	0.00010294	8.1	0	0.971	0.486
769	LG2(N4)	31.732		0.59	4	0.75856	0.764548	0.75856	0.764548	0.000103186	7.9	0	0.955	0.477
770	LG2(N4)	32.732		0.57	5	0.758577	0.76448	0.758577	0.76448	0.000103459	7.7	0	0.95	0.475
771	LG2(N4)	33.732		0.55	4	0.758598	0.764405	0.758598	0.764405	0.000103757	7.4	0	0.958	0.479
772	LG2(N4)	34.732		0.53	4	0.758623	0.764325	0.758623	0.764325	0.000104081	7.1	0	0.978	0.489
773	LG2(N4)	35.458	ATA-cgaa260	0.51	4	0.758643	0.764263	0.758643	0.764263	0.00010433	6.9	0	1	0.5
774	LG2(N4)	36.458		0.51	4	0.758643	0.764263	0.758643	0.764263	0.000104329	6.9	0	0.983	0.492
775	LG2(N4)	36.756	TAG-cagg-310	0.51	4	0.758643	0.764263	0.758643	0.764263	0.00010433	6.9	0	1	0.5
776	LG2(N4)	37.756		0.52	4	0.758649	0.764316	0.758649	0.764316	0.000104173	7	0	0.963	0.482
777	LG2(N4)	38.756		0.53	4	0.758655	0.764369	0.758655	0.764369	0.00010402	7.2	0	0.933	0.467
778	LG2(N4)	39.756		0.54	5	0.758662	0.76442	0.758662	0.76442	0.00010387	7.3	0	0.91	0.455
779	LG2(N4)	40.756		0.55	5	0.75867	0.764472	0.75867	0.764472	0.000103725	7.4	0	0.895	0.447
780	LG2(N4)	41.756		0.55	5	0.758678	0.764522	0.758678	0.764522	0.000103586	7.6	0	0.886	0.443
781	LG2(N4)	42.756		0.56	5	0.758687	0.764571	0.758687	0.764571	0.000103451	7.7	0	0.884	0.442
782	LG2(N4)	43.756		0.57	5	0.758696	0.76462	0.758696	0.76462	0.000103324	7.8	0	0.888	0.444
783	LG2(N4)	44.756		0.58	5	0.758707	0.764667	0.758707	0.764667	0.000103202	7.9	0	0.9	0.45
784	LG2(N4)	45.756		0.59	5	0.758718	0.764712	0.758718	0.764712	0.000103089	8	0	0.919	0.46
785	LG2(N4)	46.756		0.6	4	0.75873	0.764757	0.75873	0.764757	0.000102983	8.1	0	0.945	0.472
786	LG2(N4)	47.756		0.61	4	0.758742	0.764799	0.758742	0.764799	0.000102885	8.2	0	0.978	0.489
787	LG2(N4)	48.341	ATA-cggt120	0.61	4	0.75875	0.764824	0.75875	0.764824	0.000102832	8.2	0	1	0.5
788	LG2(N4)	49.341		0.58	5	0.758806	0.764786	0.758806	0.764786	0.000103115	8	0	0.963	0.481
789	LG2(N4)	50.341		0.55	5	0.75887	0.764743	0.75887	0.764743	0.000103427	7.7	0	0.93	0.465
790	LG2(N4)	51.341		0.52	5	0.75894	0.764695	0.75894	0.764695	0.00010377	7.4	0	0.902	0.451
791	LG2(N4)	52.341		0.49	5	0.759018	0.764642	0.759018	0.764642	0.000104141	7.1	0	0.877	0.439
792	LG2(N4)	53.341		0.46	6	0.759104	0.764584	0.759104	0.764584	0.00010454	6.7	0	0.858	0.429
793	LG2(N4)	54.341		0.43	6	0.759197	0.764519	0.759197	0.764519	0.000104966	6.3	0	0.842	0.421
794	LG2(N4)	55.341		0.39	6	0.759298	0.764448	0.759298	0.764448	0.000105414	5.9	0	0.831	0.415
795	LG2(N4)	56.341		0.36	6	0.759406	0.764371	0.759406	0.764371	0.000105881	5.5	0	0.824	0.412
796	LG2(N4)	57.341		0.33	6	0.75952	0.764288	0.75952	0.764288	0.000106363	5.1	0	0.821	0.41
797	LG2(N4)	58.341		0.3	6	0.75964	0.764198	0.75964	0.764198	0.000106854	4.6	0	0.822	0.411
798	LG2(N4)	59.341		0.27	6	0.759766	0.764102	0.759766	0.764102	0.000107347	4.2	0	0.828	0.414
799	LG2(N4)	60.341		0.25	6	0.759895	0.764001	0.759895	0.764001	0.000107836	3.8	0	0.838	0.419
800	LG2(N4)	61.341		0.22	5	0.760027	0.763894	0.760027	0.763894	0.000108314	3.3	0	0.852	0.426
801	LG2(N4)	62.341		0.19	5	0.76016	0.763782	0.76016	0.763782	0.000108774	2.9	0	0.87	0.435
802	LG2(N4)	63.341		0.17	5	0.760293	0.763667	0.760293	0.763667	0.00010921	2.5	0	0.893	0.446
803	LG2(N4)	64.341		0.15	5	0.760425	0.763549	0.760425	0.763549	0.000109617	2.2	0	0.92	0.46
804	LG2(N4)	65.341		0.13	4	0.760554	0.763429	0.760554	0.763429	0.000109992	1.8	0	0.951	0.475
805	LG2(N4)	66.341		0.11	4	0.760679	0.763309	0.760679	0.763309	0.000110331	1.5	0	0.986	0.493
806	LG2(N4)	66.691	CaiSSRD01B11-250	0.1	4	0.760722	0.763267	0.760722	0.763267	0.000110441	1.4	0	1	0.5
807	LG2(N4)	66.691	LmSSR13-4G	0.1	4	0.760722	0.763267	0.760722	0.763267	0.000110441	1.4	0	1	0.5
808	LG2(N4)	66.691	CaiSSRD01B11-200	0.1	4	0.760722	0.763267	0.760722	0.763267	0.000110441	1.4	0	1	0.5
809	LG2(N4)	66.691	TTA-ctca-700	0.1	4	0.760722	0.763267	0.760722	0.763267	0.000110441	1.4	0	1	0.5
810	LG2(N4)	66.691	TAC-ctgc	0.1	4	0.760722	0.763267	0.760722	0.763267	0.000110441	1.4	0	1	0.5
811	LG2(N4)	67.691		0.15	5	0.760419	0.763603	0.760419	0.763603	0.000109529	2.2	0	0.964	0.482
812	LG2(N4)	68.691		0.19	6	0.760164	0.763884	0.760164	0.763884	0.000108607	3.1	0	0.944	0.472
813	LG2(N4)	69.691		0.24	6	0.759989	0.764083	0.759989	0.764083	0.000107881	3.7	0	0.939	0.47
814	LG2(N4)	70.691		0.28	5	0.759889	0.764215	0.759889	0.764215	0.000107396	4.1	0	0.951	0.475
815	LG2(N4)	71.691		0.31	5	0.759842	0.7643	0.759842	0.7643	0.000107114	4.4	0	0.978	0.489
816	LG2(N4)	72.251	GAC-cgtt-360	0.33	4	0.759833	0.764333	0.759833	0.764333	0.000107025	4.5	0	1	0.5
817	LG2(N4)	73.251		0.23	6	0.760052	0.7641	0.760052	0.7641	0.000107989	3.6	0	0.934	0.467
818	LG2(N4)	74.251		0.14	7	0.76037	0.763744	0.76037	0.763744	0.000109232	2.5	0	0.888	0.444
819	LG2(N4)	75.251		0.05	8	0.760859	0.763161	0.760859	0.763161	0.000110739	1.2	0	0.862	0.431
820	LG2(N4)	76.251		0	8	0.761591	0.762246	0.761591	0.762246	0.00011194	0.1	0	0.856	0.428
821	LG2(N4)	77.251		0.01	8	0.762349	0.761267	0.762349	0.761267	0.000111758	0.3	0	0.87	0.435
822	LG2(N4)	78.251		0.06	6	0.762863	0.760576	0.762863	0.760576	0.000110763	1.1	0	0.904	0.452
823	LG2(N4)	79.251		0.14	5	0.763183	0.760124	0.763183	0.760124	0.000109756	2	0	0.959	0.479
824	LG2(N4)	79.836	GAG-cccg-200	0.18	4	0.763316	0.759929	0.763316	0.759929	0.000109243	2.5	0	1	0.5
825	LG3(N4)	0	TAA-ctga-480	0.08	4	0.760824	0.763	0.760824	0.763	0.000110863	1.1	0	1	0.5
826	LG3(N4)	1		0.08	4	0.7608	0.763016	0.7608	0.763016	0.000110819	1.1	0	0.962	0.481
827	LG3(N4)	2		0.08	5	0.760778	0.763031	0.760778	0.763031	0.000110777	1.1	0	0.927	0.463
828	LG3(N4)	3		0.08	5	0.760756	0.763045	0.760756	0.763045	0.000110736	1.2	0	0.894	0.447
829	LG3(N4)	4		0.07	6	0.760735	0.763058	0.760735	0.763058	0.000110697	1.2	0	0.864	0.432
830	LG3(N4)	5		0.07	6	0.760716	0.763069	0.760716	0.763069	0.000110661	1.2	0	0.835	0.418
831	LG3(N4)	6		0.07	6	0.760698	0.763079	0.760698	0.763079	0.000110629	1.3	0	0.81	0.405
832	LG3(N4)	7		0.07	7	0.760682	0.763086	0.760682	0.763086	0.000110601	1.3	0	0.786	0.393
833	LG3(N4)	8		0.07	7	0.760668	0.763091	0.760668	0.763091	0.000110578	1.3	0	0.765	0.382
834	LG3(N4)	9		0.07	7	0.760657	0.763094	0.760657	0.763094	0.000110561	1.3	0	0.746	0.373
835	LG3(N4)	10		0.07	7	0.760648	0.763094	0.760648	0.763094	0.00011055	1.3	0	0.729	0.364
836	LG3(N4)	11		0.07	7	0.760642	0.763091	0.760642	0.763091	0.000110546	1.3	0	0.714	0.357
837	LG3(N4)	12		0.07	8	0.760639	0.763086	0.760639	0.763086	0.00011055	1.3	0	0.702	0.351
838	LG3(N4)	13		0.06	8	0.76064	0.763077	0.76064	0.763077	0.000110562	1.3	0	0.691	0.346
839	LG3(N4)	14		0.06	8	0.760644	0.763064	0.760644	0.763064	0.000110582	1.3	0	0.683	0.341
840	LG3(N4)	15		0.06	8	0.760653	0.763049	0.760653	0.763049	0.000110611	1.3	0	0.676	0.338
841	LG3(N4)	16		0.06	8	0.760665	0.763029	0.760665	0.763029	0.000110649	1.2	0	0.672	0.336
842	LG3(N4)	17		0.06	8	0.76068	0.763007	0.76068	0.763007	0.000110694	1.2	0	0.67	0.335
843	LG3(N4)	18		0.05	8	0.7607	0.762981	0.7607	0.762981	0.000110747	1.2	0	0.67	0.335
844	LG3(N4)	19		0.05	8	0.760724	0.762952	0.760724	0.762952	0.000110807	1.1	0	0.672	0.336
845	LG3(N4)	20		0.05	8	0.760751	0.76292	0.760751	0.76292	0.000110872	1	0	0.675	0.338
846	LG3(N4)	21		0.05	8	0.760781	0.762885	0.760781	0.762885	0.000110941	1	0	0.681	0.341
847	LG3(N4)	22		0.04	8	0.760814	0.762848	0.760814	0.762848	0.000111014	0.9	0	0.689	0.345
848	LG3(N4)	23		0.04	8	0.76085	0.762809	0.76085	0.762809	0.000111089	0.9	0	0.7	0.35
849	LG3(N4)	24		0.04	7	0.760888	0.762769	0.760888	0.762769	0.000111164	0.8	0	0.712	0.356
850	LG3(N4)	25		0.04	7	0.760928	0.762728	0.760928	0.762728	0.000111239	0.7	0	0.726	0.363
851	LG3(N4)	26		0.03	7	0.760969	0.762686	0.760969	0.762686	0.000111311	0.7	0	0.743	0.371
852	LG3(N4)	27		0.03	7	0.76101	0.762644	0.76101	0.762644	0.000111381	0.6	0	0.761	0.381
853	LG3(N4)	28		0.03	6	0.761053	0.762602	0.761053	0.762602	0.000111448	0.5	0	0.782	0.391
854	LG3(N4)	29		0.03	6	0.761094	0.762561	0.761094	0.762561	0.000111511	0.5	0	0.805	0.403
855	LG3(N4)	30		0.02	6	0.761136	0.762521	0.761136	0.762521	0.000111569	0.4	0	0.831	0.415
856	LG3(N4)	31		0.02	5	0.761176	0.762481	0.761176	0.762481	0.000111623	0.4	0	0.858	0.429
857	LG3(N4)	32		0.02	5	0.761216	0.762444	0.761216	0.762444	0.000111672	0.3	0	0.888	0.444
858	LG3(N4)	33		0.02	5	0.761254	0.762407	0.761254	0.762407	0.000111716	0.3	0	0.921	0.46
859	LG3(N4)	34		0.02	4	0.761292	0.762372	0.761292	0.762372	0.000111756	0.3	0	0.956	0.478
860	LG3(N4)	35		0.02	4	0.761327	0.762339	0.761327	0.762339	0.000111792	0.2	0	0.993	0.497
861	LG3(N4)	35.179	LmSSR18-2E	0.02	4	0.761333	0.762333	0.761333	0.762333	0.000111798	0.2	0	1	0.5
862	LG3(N4)	36.179		0.01	4	0.761385	0.762283	0.761385	0.762283	0.000111846	0.2	0	0.962	0.481
863	LG3(N4)	37.179		0.01	4	0.761442	0.762231	0.761442	0.762231	0.000111892	0.1	0	0.935	0.468
864	LG3(N4)	38.179		0.01	4	0.761504	0.762177	0.761504	0.762177	0.000111934	0.1	0	0.919	0.459
865	LG3(N4)	39.179		0	4	0.76157	0.762121	0.76157	0.762121	0.000111971	0.1	0	0.913	0.456
866	LG3(N4)	40.179		0	4	0.761638	0.762065	0.761638	0.762065	0.000112001	0	0	0.917	0.459
867	LG3(N4)	41.179		0	4	0.761707	0.762009	0.761707	0.762009	0.000112024	0	0	0.932	0.466
868	LG3(N4)	42.179		0	3	0.761778	0.761954	0.761778	0.761954	0.000112038	0	0	0.958	0.479
869	LG3(N4)	43.179		0	3	0.761848	0.761902	0.761848	0.761902	0.000112045	0	0	0.994	0.497
870	LG3(N4)	43.315	LmSSR15-8G	0	3	0.761857	0.761895	0.761857	0.761895	0.000112046	0	0	1	0.5
871	LG3(N4)	44.315		0	3	0.761873	0.761883	0.761873	0.761883	0.000112046	0	0	0.969	0.484
872	LG3(N4)	45.315		0	4	0.761897	0.761867	0.761897	0.761867	0.000112046	0	0	0.967	0.483
873	LG3(N4)	46.315		0	3	0.761915	0.761858	0.761915	0.761858	0.000112045	0	0	0.994	0.497
874	LG3(N4)	46.461	GAG-cgga	0	3	0.761917	0.761857	0.761917	0.761857	0.000112045	0	0	1	0.5
875	LG3(N4)	47.461		0	4	0.762249	0.761674	0.762249	0.761674	0.00011197	0.1	0	0.942	0.471
876	LG3(N4)	48.461		0.02	5	0.762647	0.761465	0.762647	0.761465	0.000111728	0.3	0	0.901	0.45
877	LG3(N4)	49.461		0.04	6	0.763086	0.761248	0.763086	0.761248	0.000111284	0.7	0	0.876	0.438
878	LG3(N4)	50.461		0.07	6	0.763522	0.761046	0.763522	0.761046	0.000110677	1.2	0	0.866	0.433
879	LG3(N4)	51.461		0.11	6	0.763917	0.760879	0.763917	0.760879	0.000110009	1.8	0	0.873	0.437
880	LG3(N4)	52.461		0.15	6	0.764253	0.760755	0.764253	0.760755	0.000109378	2.4	0	0.896	0.448
881	LG3(N4)	53.461		0.19	5	0.764534	0.760669	0.764534	0.760669	0.000108834	2.9	0	0.935	0.468
882	LG3(N4)	54.461		0.24	4	0.764769	0.760614	0.764769	0.760614	0.000108391	3.3	0	0.991	0.495
883	LG3(N4)	54.605	TTA-cgtg-150	0.24	4	0.7648	0.760609	0.7648	0.760609	0.000108336	3.3	0	1	0.5
884	LG3(N4)	55.605		0.2	5	0.764552	0.760622	0.764552	0.760622	0.000108687	3	0	0.936	0.468
885	LG3(N4)	56.605		0.16	6	0.764236	0.760694	0.764236	0.760694	0.000109254	2.5	0	0.907	0.454
886	LG3(N4)	57.605		0.11	6	0.763827	0.760844	0.763827	0.760844	0.000110031	1.8	0	0.912	0.456
887	LG3(N4)	58.605		0.07	5	0.76334	0.761068	0.76334	0.761068	0.000110861	1.1	0	0.952	0.476
888	LG3(N4)	59.299	LmSSRH15-9F-360*	0.05	4	0.763	0.761238	0.763	0.761238	0.000111328	0.6	0	1	0.5
889	LG3(N4)	60.299		0.17	6	0.764082	0.760503	0.764082	0.760503	0.000109015	2.7	0	0.953	0.477
890	LG3(N4)	61.202	GTA-ccaa-300	0.3	4	0.764538	0.76015	0.764538	0.76015	0.000107448	4.1	0	1	0.5
891	LG3(N4)	62.202		0.27	5	0.764424	0.760204	0.764424	0.760204	0.000107784	3.8	0	0.953	0.477
892	LG3(N4)	63.202		0.24	5	0.764276	0.760296	0.764276	0.760296	0.00010825	3.4	0	0.941	0.47
893	LG3(N4)	64.202		0.2	4	0.764087	0.760429	0.764087	0.760429	0.000108844	2.9	0	0.963	0.481
894	LG3(N4)	64.927	TAT-ccaa-210	0.18	4	0.763923	0.76055	0.763923	0.76055	0.000109329	2.4	0	1	0.5
895	LG3(N4)	65.927		0.39	6	0.764902	0.759721	0.764902	0.759721	0.000105522	5.8	0	0.976	0.488
896	LG3(N4)	66.831	GTA-cact-160	0.54	4	0.765214	0.759421	0.765214	0.759421	0.000103848	7.3	0	1	0.5
897	LG3(N4)	66.831	GAC-cccc-180	0.54	4	0.765214	0.759421	0.765214	0.759421	0.000103848	7.3	0	1	0.5
898	LG3(N4)	66.831	ATG-cgat80	0.54	4	0.765214	0.759421	0.765214	0.759421	0.000103848	7.3	0	1	0.5
899	LG3(N4)	66.831	LmSSRH14-4A	0.54	4	0.765214	0.759421	0.765214	0.759421	0.000103848	7.3	0	1	0.5
900	LG3(N4)	67.831		0.34	6	0.764775	0.759832	0.764775	0.759832	0.000106118	5.3	0	0.977	0.488
901	LG3(N4)	68.58	ATG-ctag-150	0.16	4	0.763846	0.7606	0.763846	0.7606	0.00010953	2.2	0	1	0.5
902	LG3(N4)	69.58		0.14	5	0.76374	0.760658	0.76374	0.760658	0.000109773	2	0	0.967	0.484
903	LG3(N4)	70.58		0.12	5	0.763608	0.760732	0.763608	0.760732	0.000110063	1.8	0	0.944	0.472
904	LG3(N4)	71.58		0.09	5	0.763444	0.760827	0.763444	0.760827	0.000110399	1.5	0	0.929	0.465
905	LG3(N4)	72.58		0.07	6	0.763248	0.760944	0.763248	0.760944	0.000110767	1.1	0	0.924	0.462
906	LG3(N4)	73.58		0.05	6	0.763022	0.761084	0.763022	0.761084	0.000111138	0.8	0	0.928	0.464
907	LG3(N4)	74.58		0.03	5	0.762779	0.761241	0.762779	0.761241	0.000111471	0.5	0	0.941	0.471
908	LG3(N4)	75.58		0.02	5	0.762538	0.761403	0.762538	0.761403	0.000111732	0.3	0	0.963	0.482
909	LG3(N4)	76.58		0.01	4	0.762315	0.761558	0.762315	0.761558	0.000111906	0.1	0	0.995	0.497
910	LG3(N4)	76.72	LmSSR7-3E	0.01	4	0.762286	0.761579	0.762286	0.761579	0.000111924	0.1	0	1	0.5
911	LG3(N4)	77.72		0.01	4	0.762388	0.761507	0.762388	0.761507	0.000111856	0.2	0	0.951	0.476
912	LG3(N4)	78.72		0.02	5	0.762496	0.761431	0.762496	0.761431	0.00011177	0.2	0	0.912	0.456
913	LG3(N4)	79.72		0.02	5	0.762605	0.761356	0.762605	0.761356	0.000111666	0.3	0	0.882	0.441
914	LG3(N4)	80.72		0.03	5	0.762713	0.761283	0.762713	0.761283	0.000111549	0.4	0	0.862	0.431
915	LG3(N4)	81.72		0.03	5	0.762815	0.761216	0.762815	0.761216	0.000111425	0.6	0	0.851	0.426
916	LG3(N4)	82.72		0.04	5	0.762909	0.761157	0.762909	0.761157	0.000111302	0.7	0	0.851	0.425
917	LG3(N4)	83.72		0.05	5	0.762993	0.761107	0.762993	0.761107	0.000111186	0.8	0	0.859	0.43
918	LG3(N4)	84.72		0.06	5	0.763066	0.761067	0.763066	0.761067	0.000111082	0.9	0	0.877	0.439
919	LG3(N4)	85.72		0.06	5	0.763128	0.761036	0.763128	0.761036	0.000110994	0.9	0	0.905	0.452
920	LG3(N4)	86.72		0.07	5	0.76318	0.761015	0.76318	0.761015	0.000110922	1	0	0.942	0.471
921	LG3(N4)	87.72		0.08	4	0.763223	0.761002	0.763223	0.761002	0.000110867	1.1	0	0.989	0.495
922	LG3(N4)	87.924	GTT-ctcg-340	0.08	4	0.763231	0.761	0.763231	0.761	0.000110858	1.1	0	1	0.5
923	LG3(N4)	88.924		0.08	4	0.763225	0.760986	0.763225	0.760986	0.000110845	1.1	0	0.946	0.473
924	LG3(N4)	89.924		0.07	4	0.763214	0.760977	0.763214	0.760977	0.000110842	1.1	0	0.905	0.453
925	LG3(N4)	90.924		0.07	5	0.763198	0.760973	0.763198	0.760973	0.000110851	1.1	0	0.879	0.439
926	LG3(N4)	91.924		0.07	5	0.763176	0.760974	0.763176	0.760974	0.000110872	1	0	0.866	0.433
927	LG3(N4)	92.924		0.07	5	0.763149	0.76098	0.763149	0.76098	0.000110904	1	0	0.868	0.434
928	LG3(N4)	93.924		0.07	5	0.763116	0.760992	0.763116	0.760992	0.000110948	1	0	0.883	0.442
929	LG3(N4)	94.924		0.06	4	0.763079	0.761009	0.763079	0.761009	0.000111003	0.9	0	0.913	0.456
930	LG3(N4)	95.924		0.06	4	0.763036	0.761032	0.763036	0.761032	0.000111066	0.9	0	0.956	0.478
931	LG3(N4)	96.706	TAT-ccaa-110	0.06	4	0.763	0.761053	0.763	0.761053	0.00011112	0.8	0	1	0.5
932	LG3(N4)	97.706		0.07	4	0.763118	0.760996	0.763118	0.760996	0.000110951	1	0	0.973	0.486
933	LG3(N4)	98.706		0.08	4	0.763236	0.760942	0.763236	0.760942	0.000110775	1.1	0	0.964	0.482
934	LG3(N4)	99.706		0.09	4	0.763351	0.760894	0.763351	0.760894	0.000110596	1.3	0	0.973	0.486
935	LG3(N4)	100.699	LmSSR15-7C-100	0.1	4	0.763462	0.76085	0.763462	0.76085	0.000110418	1.5	0	1	0.5
936	LG3(N4)	101.699		0.1	4	0.763462	0.76085	0.763462	0.76085	0.000110417	1.5	0	0.976	0.488
937	LG3(N4)	102.699		0.1	4	0.763462	0.76085	0.763462	0.76085	0.000110417	1.5	0	0.992	0.496
938	LG3(N4)	102.895	ATA-cggt250	0.1	4	0.763462	0.76085	0.763462	0.76085	0.000110418	1.5	0	1	0.5
939	LG3(N4)	103.895		0.14	5	0.763722	0.760655	0.763722	0.760655	0.00010979	2	0	0.956	0.478
940	LG3(N4)	104.895		0.18	5	0.763975	0.760457	0.763975	0.760457	0.000109066	2.7	0	0.923	0.461
941	LG3(N4)	105.895		0.23	5	0.764214	0.760264	0.764214	0.760264	0.000108276	3.4	0	0.901	0.45
942	LG3(N4)	106.895		0.28	5	0.764434	0.760082	0.764434	0.760082	0.000107455	4.1	0	0.89	0.445
943	LG3(N4)	107.895		0.33	5	0.764631	0.759915	0.764631	0.759915	0.000106641	4.8	0	0.889	0.445
944	LG3(N4)	108.895		0.38	5	0.764806	0.759766	0.764806	0.759766	0.000105861	5.5	0	0.9	0.45
945	LG3(N4)	109.895		0.43	5	0.76496	0.759635	0.76496	0.759635	0.000105134	6.2	0	0.922	0.461
946	LG3(N4)	110.895		0.49	5	0.765093	0.759522	0.765093	0.759522	0.00010447	6.8	0	0.954	0.477
947	LG3(N4)	111.895		0.54	4	0.765209	0.759425	0.765209	0.759425	0.000103875	7.3	0	0.998	0.499
948	LG3(N4)	111.943	ATT-cggt200	0.54	4	0.765214	0.759421	0.765214	0.759421	0.000103848	7.3	0	1	0.5
949	LG4(N4)	0	AAA-caca-200	0.01	4	0.7622	0.761611	0.7622	0.761611	0.00011196	0.1	0	1	0.5
950	LG4(N4)	1		0.01	4	0.762332	0.761504	0.762332	0.761504	0.000111876	0.2	0	0.967	0.483
951	LG4(N4)	2		0.02	4	0.762471	0.761393	0.762471	0.761393	0.000111758	0.3	0	0.938	0.469
952	LG4(N4)	3		0.03	5	0.762615	0.76128	0.762615	0.76128	0.000111605	0.4	0	0.914	0.457
953	LG4(N4)	4		0.04	5	0.762763	0.761165	0.762763	0.761165	0.000111415	0.6	0	0.895	0.447
954	LG4(N4)	5		0.05	5	0.762913	0.761051	0.762913	0.761051	0.00011119	0.8	0	0.88	0.44
955	LG4(N4)	6		0.06	5	0.763063	0.760938	0.763063	0.760938	0.000110932	1	0	0.87	0.435
956	LG4(N4)	7		0.08	5	0.763211	0.760829	0.763211	0.760829	0.000110647	1.2	0	0.864	0.432
957	LG4(N4)	8		0.1	5	0.763356	0.760725	0.763356	0.760725	0.000110341	1.5	0	0.863	0.432
958	LG4(N4)	9		0.12	5	0.763495	0.760626	0.763495	0.760626	0.000110021	1.8	0	0.867	0.433
959	LG4(N4)	10		0.14	5	0.763628	0.760534	0.763628	0.760534	0.000109694	2.1	0	0.875	0.437
960	LG4(N4)	11		0.16	5	0.763754	0.76045	0.763754	0.76045	0.000109366	2.4	0	0.888	0.444
961	LG4(N4)	12		0.18	5	0.763871	0.760372	0.763871	0.760372	0.000109043	2.7	0	0.905	0.453
962	LG4(N4)	13		0.2	5	0.763981	0.760301	0.763981	0.760301	0.00010873	3	0	0.927	0.464
963	LG4(N4)	14		0.23	5	0.764082	0.760237	0.764082	0.760237	0.000108429	3.2	0	0.954	0.477
964	LG4(N4)	15		0.25	4	0.764176	0.76018	0.764176	0.76018	0.000108144	3.5	0	0.985	0.493
965	LG4(N4)	15.428	AAA-caca-240	0.26	4	0.764214	0.760158	0.764214	0.760158	0.000108027	3.6	0	1	0.5
966	LG4(N4)	16.428		0.26	4	0.764215	0.760158	0.764215	0.760158	0.000108026	3.6	0	0.965	0.482
967	LG4(N4)	17.428		0.26	4	0.764214	0.760158	0.764214	0.760158	0.000108027	3.6	0	0.997	0.499
968	LG4(N4)	17.471	CaiSSRB02F09	0.26	4	0.764214	0.760158	0.764214	0.760158	0.000108027	3.6	0	1	0.5
969	LG4(N4)	18.471		0.23	4	0.764053	0.760212	0.764053	0.760212	0.000108421	3.2	0	0.967	0.484
970	LG4(N4)	19.471		0.21	4	0.763877	0.760276	0.763877	0.760276	0.000108844	2.9	0	0.971	0.486
971	LG4(N4)	20.237	LmSSR15-11G-180	0.19	4	0.763733	0.760333	0.763733	0.760333	0.00010918	2.6	0	1	0.5
972	LG4(N4)	21.237		0.23	4	0.764023	0.760184	0.764023	0.760184	0.000108413	3.2	0	0.967	0.484
973	LG4(N4)	22.237		0.28	4	0.764272	0.760068	0.764272	0.760068	0.000107711	3.9	0	0.972	0.486
974	LG4(N4)	22.985	TAG-cctg-170	0.31	4	0.764429	0.76	0.764429	0.76	0.000107255	4.3	0	1	0.5
975	LG4(N4)	23.985		0.31	4	0.764429	0.76	0.764429	0.76	0.000107255	4.3	0	0.981	0.49
976	LG4(N4)	24.384	GTC-cgct-210	0.31	4	0.764429	0.76	0.764429	0.76	0.000107255	4.3	0	1	0.5
977	LG4(N4)	25.384		0.31	4	0.764429	0.76	0.764429	0.76	0.000107254	4.3	0	0.977	0.488
978	LG4(N4)	26.384		0.31	4	0.764429	0.76	0.764429	0.76	0.000107254	4.3	0	0.988	0.494
979	LG4(N4)	26.722	ATA-cctt110	0.31	4	0.764429	0.76	0.764429	0.76	0.000107255	4.3	0	1	0.5
980	LG4(N4)	26.722	TTC-cccg-380	0.31	4	0.764429	0.76	0.764429	0.76	0.000107255	4.3	0	1	0.5
981	LG4(N4)	27.234	GTG-ccag-260	0.31	4	0.764429	0.76	0.764429	0.76	0.000107255	4.3	0	1	0.5
982	LG4(N4)	27.234	GTA-cggt-180	0.31	4	0.764429	0.76	0.764429	0.76	0.000107255	4.3	0	1	0.5
983	LG4(N4)	27.97	CaiSSRB08G02-170	0.31	4	0.764429	0.76	0.764429	0.76	0.000107255	4.3	0	1	0.5
984	LG4(N4)	28.97		0.31	4	0.764429	0.76	0.764429	0.76	0.000107254	4.3	0	0.965	0.482
985	LG4(N4)	29.844	ATG-cgat280	0.31	4	0.764429	0.76	0.764429	0.76	0.000107255	4.3	0	1	0.5
986	LG4(N4)	30.156	TAC-cagc-300	0.31	4	0.764429	0.76	0.764429	0.76	0.000107255	4.3	0	1	0.5
987	LG4(N4)	31.156		0.31	4	0.764429	0.76	0.764429	0.76	0.000107255	4.3	0	0.999	0.499
988	LG4(N4)	31.188	GAA-cgtg-460	0.31	4	0.764429	0.76	0.764429	0.76	0.000107255	4.3	0	1	0.5
989	LG4(N4)	32.188		0.32	5	0.764426	0.759917	0.764426	0.759917	0.00010705	4.5	0	0.958	0.479
990	LG4(N4)	33.188		0.32	5	0.76442	0.759835	0.76442	0.759835	0.000106854	4.6	0	0.92	0.46
991	LG4(N4)	34.188		0.33	5	0.76441	0.759754	0.76441	0.759754	0.000106668	4.8	0	0.887	0.443
992	LG4(N4)	35.188		0.33	5	0.764397	0.759675	0.764397	0.759675	0.000106494	5	0	0.859	0.429
993	LG4(N4)	36.188		0.34	6	0.764381	0.759597	0.764381	0.759597	0.000106335	5.1	0	0.835	0.417
994	LG4(N4)	37.188		0.34	6	0.764362	0.759521	0.764362	0.759521	0.000106193	5.2	0	0.816	0.408
995	LG4(N4)	38.188		0.35	6	0.764338	0.759449	0.764338	0.759449	0.00010607	5.3	0	0.801	0.4
996	LG4(N4)	39.188		0.35	6	0.764311	0.75938	0.764311	0.75938	0.000105967	5.4	0	0.791	0.395
997	LG4(N4)	40.188		0.35	6	0.764281	0.759315	0.764281	0.759315	0.000105887	5.5	0	0.785	0.392
998	LG4(N4)	41.188		0.36	6	0.764247	0.759254	0.764247	0.759254	0.00010583	5.5	0	0.784	0.392
999	LG4(N4)	42.188		0.36	6	0.764209	0.759199	0.764209	0.759199	0.0001058	5.6	0	0.787	0.393
1000	LG4(N4)	43.188		0.36	6	0.764168	0.759149	0.764168	0.759149	0.000105796	5.6	0	0.794	0.397
1001	LG4(N4)	44.188		0.36	6	0.764123	0.759105	0.764123	0.759105	0.00010582	5.6	0	0.806	0.403
1002	LG4(N4)	45.188		0.36	6	0.764075	0.759068	0.764075	0.759068	0.000105872	5.5	0	0.823	0.412
1003	LG4(N4)	46.188		0.36	6	0.764024	0.759038	0.764024	0.759038	0.000105952	5.4	0	0.844	0.422
1004	LG4(N4)	47.188		0.36	6	0.763969	0.759015	0.763969	0.759015	0.000106061	5.3	0	0.87	0.435
1005	LG4(N4)	48.188		0.36	5	0.763911	0.759001	0.763911	0.759001	0.000106196	5.2	0	0.9	0.45
1006	LG4(N4)	49.188		0.36	5	0.763851	0.758994	0.763851	0.758994	0.000106357	5.1	0	0.935	0.468
1007	LG4(N4)	50.188		0.35	5	0.763788	0.758996	0.763788	0.758996	0.000106542	4.9	0	0.975	0.487
1008	LG4(N4)	50.772	TCA-cgta	0.35	4	0.76375	0.759	0.76375	0.759	0.000106659	4.8	0	1	0.5
1009	LG4(N4)	50.848	TAG-ccac	0.35	4	0.76375	0.759	0.76375	0.759	0.000106659	4.8	0	1	0.5
1010	LG4(N4)	51.579	GGC-cttc	0.35	4	0.76375	0.759	0.76375	0.759	0.000106659	4.8	0	1	0.5
1011	LG4(N4)	52.515	ATA-ccat300	0.35	4	0.76375	0.759	0.76375	0.759	0.000106659	4.8	0	1	0.5
1012	LG4(N4)	53.515		0.33	4	0.763718	0.759078	0.763718	0.759078	0.000106895	4.6	0	0.949	0.474
1013	LG4(N4)	54.515		0.31	5	0.76368	0.759166	0.76368	0.759166	0.000107162	4.4	0	0.911	0.456
1014	LG4(N4)	55.515		0.29	5	0.763635	0.759266	0.763635	0.759266	0.000107459	4.1	0	0.888	0.444
1015	LG4(N4)	56.515		0.27	5	0.763583	0.759378	0.763583	0.759378	0.000107785	3.8	0	0.878	0.439
1016	LG4(N4)	57.515		0.24	5	0.763523	0.759503	0.763523	0.759503	0.000108139	3.5	0	0.882	0.441
1017	LG4(N4)	58.515		0.22	5	0.763456	0.759638	0.763456	0.759638	0.000108513	3.2	0	0.9	0.45
1018	LG4(N4)	59.515		0.2	5	0.763381	0.759784	0.763381	0.759784	0.000108899	2.8	0	0.932	0.466
1019	LG4(N4)	60.515		0.18	4	0.763299	0.759936	0.763299	0.759936	0.000109288	2.5	0	0.977	0.489
1020	LG4(N4)	60.925	AAG-cacg-340	0.17	4	0.763263	0.76	0.763263	0.76	0.000109445	2.3	0	1	0.5
1021	LG4(N4)	61.925		0.14	4	0.763148	0.760105	0.763148	0.760105	0.000109794	2	0	0.952	0.476
1022	LG4(N4)	62.925		0.12	4	0.763019	0.760229	0.763019	0.760229	0.000110165	1.7	0	0.942	0.471
1023	LG4(N4)	63.925		0.1	4	0.76288	0.760374	0.76288	0.760374	0.00011054	1.3	0	0.969	0.485
1024	LG4(N4)	64.473	LmSSR16-3F-110	0.08	4	0.7628	0.760462	0.7628	0.760462	0.00011074	1.2	0	1	0.5
1025	LG4(N4)	65.473		0.08	4	0.7628	0.760461	0.7628	0.760461	0.000110739	1.2	0	0.978	0.489
1026	LG4(N4)	66.473		0.08	4	0.7628	0.760461	0.7628	0.760461	0.000110739	1.2	0	0.979	0.49
1027	LG4(N4)	67.404	LmSSR18-2B-390*	0.08	4	0.7628	0.760462	0.7628	0.760462	0.00011074	1.2	0	1	0.5
1028	LG4(N4)	68.404		0.11	4	0.762893	0.760246	0.762893	0.760246	0.00011039	1.5	0	0.979	0.489
1029	LG4(N4)	69.404		0.13	4	0.762974	0.760038	0.762974	0.760038	0.00011003	1.8	0	0.978	0.489
1030	LG4(N4)	70.404		0.15	4	0.763044	0.759845	0.763044	0.759845	0.000109677	2.1	0	0.998	0.499
1031	LG4(N4)	70.469	ATA-ctaa-300	0.15	4	0.763048	0.759833	0.763048	0.759833	0.000109655	2.1	0	1	0.5
1032	LG4(N4)	71.469		0.19	5	0.763201	0.759547	0.763201	0.759547	0.000108963	2.8	0	0.967	0.484
1033	LG4(N4)	72.469		0.22	6	0.763351	0.759264	0.763351	0.759264	0.000108197	3.4	0	0.941	0.47
1034	LG4(N4)	73.469		0.26	6	0.763489	0.759001	0.763489	0.759001	0.000107412	4.1	0	0.92	0.46
1035	LG4(N4)	74.469		0.3	6	0.76361	0.758772	0.76361	0.758772	0.000106668	4.8	0	0.906	0.453
1036	LG4(N4)	75.469		0.34	6	0.763712	0.758582	0.763712	0.758582	0.000106002	5.4	0	0.897	0.448
1037	LG4(N4)	76.469		0.38	6	0.763798	0.75843	0.763798	0.75843	0.000105426	5.9	0	0.894	0.447
1038	LG4(N4)	77.469		0.41	6	0.76387	0.758309	0.76387	0.758309	0.000104938	6.3	0	0.897	0.449
1039	LG4(N4)	78.469		0.45	6	0.76393	0.758213	0.76393	0.758213	0.000104528	6.7	0	0.906	0.453
1040	LG4(N4)	79.469		0.48	5	0.763981	0.758139	0.763981	0.758139	0.000104182	7	0	0.921	0.461
1041	LG4(N4)	80.469		0.51	5	0.764025	0.75808	0.764025	0.75808	0.000103892	7.3	0	0.942	0.471
1042	LG4(N4)	81.469		0.54	5	0.764063	0.758034	0.764063	0.758034	0.000103646	7.5	0	0.969	0.485
1043	LG4(N4)	82.415	AAC-ccgt250	0.57	4	0.764095	0.758	0.764095	0.758	0.000103449	7.7	0	1	0.5
1044	LG4(N4)	83.415		0.61	5	0.764231	0.757931	0.764231	0.757931	0.000102761	8.3	0	0.963	0.482
1045	LG4(N4)	84.415		0.65	5	0.764359	0.75787	0.764359	0.75787	0.000102103	8.9	0	0.937	0.468
1046	LG4(N4)	85.415		0.69	5	0.764481	0.757818	0.764481	0.757818	0.000101481	9.4	0	0.92	0.46
1047	LG4(N4)	86.415		0.73	5	0.764594	0.757773	0.764594	0.757773	0.0001009	9.9	0	0.912	0.456
1048	LG4(N4)	87.415		0.77	5	0.764698	0.757735	0.764698	0.757735	0.000100363	10.4	0	0.915	0.457
1049	LG4(N4)	88.415		0.81	5	0.764794	0.757702	0.764794	0.757702	9.98708e-05	10.9	0	0.927	0.463
1050	LG4(N4)	89.415		0.84	5	0.764882	0.757675	0.764882	0.757675	9.94237e-05	11.3	0	0.948	0.474
1051	LG4(N4)	90.415		0.88	4	0.764961	0.757653	0.764961	0.757653	9.90203e-05	11.6	0	0.98	0.49
1052	LG4(N4)	90.942	GAT-cggt-160	0.9	4	0.765	0.757643	0.765	0.757643	9.88247e-05	11.8	0	1	0.5
1053	LG4(N4)	91.942		0.9	4	0.765001	0.757642	0.765001	0.757642	9.88202e-05	11.8	0	0.966	0.483
1054	LG4(N4)	92.942		0.9	4	0.765	0.757642	0.765	0.757642	9.88213e-05	11.8	0	0.975	0.487
1055	LG4(N4)	93.548	AAA-caca-120	0.9	4	0.765	0.757643	0.765	0.757643	9.88247e-05	11.8	0	1	0.5
1056	LG4(N4)	94.548		0.94	5	0.765108	0.757477	0.765108	0.757477	9.78318e-05	12.7	0	0.961	0.481
1057	LG4(N4)	95.548		0.98	6	0.7652	0.757352	0.7652	0.757352	9.70085e-05	13.4	0	0.93	0.465
1058	LG4(N4)	96.548		1.02	6	0.76528	0.757264	0.76528	0.757264	9.63539e-05	14	0	0.908	0.454
1059	LG4(N4)	97.548		1.05	6	0.765348	0.75721	0.765348	0.75721	9.58495e-05	14.5	0	0.893	0.446
1060	LG4(N4)	98.548		1.08	6	0.765408	0.757182	0.765408	0.757182	9.54718e-05	14.8	0	0.886	0.443
1061	LG4(N4)	99.548		1.11	6	0.765461	0.757176	0.765461	0.757176	9.5198e-05	15	0	0.886	0.443
1062	LG4(N4)	100.548		1.13	5	0.76551	0.757187	0.76551	0.757187	9.50089e-05	15.2	0	0.895	0.448
1063	LG4(N4)	101.548		1.15	5	0.765555	0.757211	0.765555	0.757211	9.4889e-05	15.3	0	0.912	0.456
1064	LG4(N4)	102.548		1.17	5	0.765597	0.757247	0.765597	0.757247	9.48264e-05	15.4	0	0.936	0.468
1065	LG4(N4)	103.548		1.18	5	0.765637	0.757292	0.765637	0.757292	9.48115e-05	15.4	0	0.969	0.484
1066	LG4(N4)	104.336	LmSSR16-3F-120	1.2	4	0.765667	0.757333	0.765667	0.757333	9.48283e-05	15.4	0	1	0.5
1067	LG4(N4)	105.336		1.25	5	0.765789	0.757145	0.765789	0.757145	9.35364e-05	16.5	0	0.963	0.481
1068	LG4(N4)	106.336		1.3	6	0.765884	0.756982	0.765884	0.756982	9.24348e-05	17.5	0	0.936	0.468
1069	LG4(N4)	107.336		1.34	6	0.765954	0.756851	0.765954	0.756851	9.15561e-05	18.3	0	0.919	0.46
1070	LG4(N4)	108.336		1.38	6	0.766001	0.756756	0.766001	0.756756	9.09306e-05	18.8	0	0.912	0.456
1071	LG4(N4)	109.336		1.4	6	0.766025	0.756706	0.766025	0.756706	9.05996e-05	19.1	0	0.916	0.458
1072	LG4(N4)	110.336		1.41	6	0.766024	0.756713	0.766024	0.756713	9.06309e-05	19.1	0	0.929	0.465
1073	LG4(N4)	111.336		1.4	6	0.765993	0.756796	0.765993	0.756796	9.11335e-05	18.7	0	0.953	0.476
1074	LG4(N4)	112.336		1.37	5	0.765922	0.756981	0.765922	0.756981	9.22428e-05	17.7	0	0.987	0.493
1075	LG4(N4)	112.661	ATC-cgct300	1.35	4	0.765889	0.757067	0.765889	0.757067	9.27488e-05	17.2	0	1	0.5
1076	LG5(N4)	0	AGT-cgat280	0.01	4	0.762545	0.761545	0.762545	0.761545	0.000111824	0.2	0	1	0.5
1077	LG5(N4)	1		0.02	4	0.762718	0.761446	0.762718	0.761446	0.000111683	0.3	0	0.969	0.484
1078	LG5(N4)	2		0.03	4	0.76288	0.761348	0.76288	0.761348	0.000111514	0.5	0	0.953	0.477
1079	LG5(N4)	3		0.04	4	0.763025	0.761255	0.763025	0.761255	0.00011133	0.6	0	0.953	0.477
1080	LG5(N4)	4		0.06	4	0.763149	0.761169	0.763149	0.761169	0.000111145	0.8	0	0.969	0.485
1081	LG5(N4)	4.979	TAT-cagt-100	0.07	4	0.76325	0.761095	0.76325	0.761095	0.000110972	1	0	1	0.5
1082	LG5(N4)	5.979		0.06	5	0.763239	0.761074	0.763239	0.761074	0.000110951	1	0	0.961	0.481
1083	LG5(N4)	6.979		0.06	6	0.76322	0.761057	0.76322	0.761057	0.000110944	1	0	0.927	0.463
1084	LG5(N4)	7.979		0.05	6	0.76319	0.761048	0.76319	0.761048	0.000110957	1	0	0.896	0.448
1085	LG5(N4)	8.979		0.05	7	0.763149	0.761048	0.763149	0.761048	0.000110991	0.9	0	0.87	0.435
1086	LG5(N4)	9.979		0.04	8	0.763092	0.76106	0.763092	0.76106	0.000111053	0.9	0	0.847	0.423
1087	LG5(N4)	10.979		0.03	8	0.763017	0.761087	0.763017	0.761087	0.000111145	0.8	0	0.828	0.414
1088	LG5(N4)	11.979		0.03	9	0.762921	0.761131	0.762921	0.761131	0.000111267	0.7	0	0.813	0.407
1089	LG5(N4)	12.979		0.02	10	0.762802	0.761197	0.762802	0.761197	0.000111416	0.6	0	0.802	0.401
1090	LG5(N4)	13.979		0.01	10	0.762659	0.761286	0.762659	0.761286	0.000111584	0.4	0	0.795	0.397
1091	LG5(N4)	14.979		0.01	10	0.762493	0.761399	0.762493	0.761399	0.000111751	0.3	0	0.791	0.395
1092	LG5(N4)	15.979		0	9	0.762313	0.76153	0.762313	0.76153	0.000111895	0.1	0	0.791	0.396
1093	LG5(N4)	16.979		0	9	0.76213	0.761671	0.76213	0.761671	0.000111994	0	0	0.795	0.398
1094	LG5(N4)	17.979		0	7	0.761957	0.761812	0.761957	0.761812	0.000112041	0	0	0.803	0.401
1095	LG5(N4)	18.979		0	6	0.761806	0.761942	0.761806	0.761942	0.000112041	0	0	0.814	0.407
1096	LG5(N4)	19.979		0	7	0.761679	0.762058	0.761679	0.762058	0.00011201	0	0	0.83	0.415
1097	LG5(N4)	20.979		0	7	0.761578	0.762156	0.761578	0.762156	0.000111962	0.1	0	0.849	0.425
1098	LG5(N4)	21.979		0.01	6	0.7615	0.762238	0.7615	0.762238	0.00011191	0.1	0	0.872	0.436
1099	LG5(N4)	22.979		0.01	6	0.761441	0.762306	0.761441	0.762306	0.000111859	0.2	0	0.899	0.45
1100	LG5(N4)	23.979		0.01	5	0.761399	0.762361	0.761399	0.762361	0.000111815	0.2	0	0.93	0.465
1101	LG5(N4)	24.979		0.02	5	0.76137	0.762405	0.76137	0.762405	0.000111778	0.2	0	0.965	0.483
1102	LG5(N4)	25.875	AAT-cgct150	0.02	4	0.761353	0.762437	0.761353	0.762437	0.000111752	0.3	0	1	0.5
1103	LG5(N4)	26.875		0	4	0.761637	0.762148	0.761637	0.762148	0.000111981	0.1	0	0.96	0.48
1104	LG5(N4)	27.875		0	4	0.761957	0.761787	0.761957	0.761787	0.000112039	0	0	0.941	0.471
1105	LG5(N4)	28.875		0.01	5	0.762268	0.761394	0.762268	0.761394	0.000111857	0.2	0	0.944	0.472
1106	LG5(N4)	29.875		0.03	5	0.762528	0.761028	0.762528	0.761028	0.000111493	0.5	0	0.967	0.484
1107	LG5(N4)	30.646	ATT-ccat300	0.06	4	0.762684	0.760786	0.762684	0.760786	0.000111166	0.8	0	1	0.5
1108	LG5(N4)	31.25	GAC-cagt-100	0.06	4	0.762684	0.760786	0.762684	0.760786	0.000111166	0.8	0	1	0.5
1109	LG5(N4)	32.03	CaiSSRB03C04-190	0.06	4	0.762684	0.760786	0.762684	0.760786	0.000111166	0.8	0	1	0.5
1110	LG5(N4)	32.699	LmSSRT132E-100*	0.06	4	0.762684	0.760786	0.762684	0.760786	0.000111166	0.8	0	1	0.5
1111	LG5(N4)	32.699	CaiSSRB03C04-170	0.06	4	0.762684	0.760786	0.762684	0.760786	0.000111166	0.8	0	1	0.5
1112	LG5(N4)	33.699		0.1	4	0.762903	0.760339	0.762903	0.760339	0.000110468	1.4	0	0.992	0.496
1113	LG5(N4)	33.959	ATT-ctat-200	0.11	4	0.76295	0.760231	0.76295	0.760231	0.000110281	1.6	0	1	0.5
1114	LG5(N4)	33.959	TTG-ccgg	0.11	4	0.76295	0.760231	0.76295	0.760231	0.000110281	1.6	0	1	0.5
1115	LG5(N4)	34.959		0.05	5	0.762635	0.760612	0.762635	0.760612	0.000111088	0.9	0	0.967	0.483
1116	LG5(N4)	35.959		0.01	5	0.762196	0.76129	0.762196	0.76129	0.000111859	0.2	0	0.973	0.486
1117	LG5(N4)	36.656	LmSSR16-4F-260	0	3	0.761909	0.761818	0.761909	0.761818	0.000112044	0	0	1	0.5
1118	LG5(N4)	37.656		0.05	7	0.762564	0.760461	0.762564	0.760461	0.000111075	0.9	0	0.934	0.467
1119	LG5(N4)	38.656		0.21	8	0.763335	0.758725	0.763335	0.758725	0.000107453	4.1	0	0.906	0.453
1120	LG5(N4)	39.656		0.43	7	0.763795	0.75757	0.763795	0.75757	0.000103788	7.4	0	0.916	0.458
1121	LG5(N4)	40.656		0.66	5	0.764019	0.756974	0.764019	0.756974	0.000101549	9.4	0	0.964	0.482
1122	LG5(N4)	41.138	ATC-caac-250	0.76	4	0.764087	0.7568	0.764087	0.7568	0.000100831	10	0	1	0.5
1123	LG5(N4)	42.138		0.87	5	0.764375	0.756741	0.764375	0.756741	9.9221e-05	11.4	0	0.991	0.495
1124	LG5(N4)	42.518	GTA-cggt-100	0.9	4	0.764455	0.756727	0.764455	0.756727	9.87769e-05	11.8	0	1	0.5
1125	LG5(N4)	43.518		0.86	5	0.764437	0.756753	0.764437	0.756753	9.89308e-05	11.7	0	0.968	0.484
1126	LG5(N4)	44.518		0.81	5	0.764407	0.756795	0.764407	0.756795	9.91912e-05	11.5	0	0.944	0.472
1127	LG5(N4)	45.518		0.76	6	0.764361	0.756861	0.764361	0.756861	9.95914e-05	11.1	0	0.93	0.465
1128	LG5(N4)	46.518		0.7	6	0.764291	0.75696	0.764291	0.75696	0.000100184	10.6	0	0.924	0.462
1129	LG5(N4)	47.518		0.63	6	0.764185	0.757113	0.764185	0.757113	0.000101053	9.8	0	0.927	0.464
1130	LG5(N4)	48.518		0.55	7	0.764026	0.75735	0.764026	0.75735	0.000102321	8.7	0	0.939	0.47
1131	LG5(N4)	49.518		0.46	6	0.76379	0.75772	0.76379	0.75772	0.000104095	7.1	0	0.96	0.48
1132	LG5(N4)	50.518		0.37	5	0.763481	0.758241	0.763481	0.758241	0.000106218	5.2	0	0.99	0.495
1133	LG5(N4)	50.788	TTG-cgta-170	0.34	4	0.763391	0.7584	0.763391	0.7584	0.000106784	4.7	0	1	0.5
1134	LG5(N4)	51.788		0.34	4	0.763394	0.758397	0.763394	0.758397	0.000106771	4.7	0	0.973	0.486
1135	LG5(N4)	52.788		0.34	4	0.763394	0.758396	0.763394	0.758396	0.000106767	4.7	0	0.964	0.482
1136	LG5(N4)	53.788		0.34	4	0.763394	0.758397	0.763394	0.758397	0.000106771	4.7	0	0.972	0.486
1137	LG5(N4)	54.788		0.34	4	0.763392	0.7584	0.763392	0.7584	0.000106783	4.7	0	0.997	0.499
1138	LG5(N4)	54.87	GAA-ctaa-150	0.34	4	0.763391	0.7584	0.763391	0.7584	0.000106784	4.7	0	1	0.5
1139	LG5(N4)	55.87		0.6	11	0.764586	0.756546	0.764586	0.756546	9.76114e-05	12.9	0	0.97	0.485
1140	LG5(N4)	56.87		0.83	9	0.765137	0.755969	0.765137	0.755969	9.27906e-05	17.2	0	0.95	0.475
1141	LG5(N4)	57.87		0.98	8	0.765361	0.755867	0.765361	0.755867	9.11113e-05	18.7	0	0.939	0.469
1142	LG5(N4)	58.87		1.05	8	0.765476	0.755913	0.765476	0.755913	9.05847e-05	19.2	0	0.938	0.469
1143	LG5(N4)	59.87		1.07	8	0.765515	0.756079	0.765515	0.756079	9.09553e-05	18.8	0	0.946	0.473
1144	LG5(N4)	60.87		1.03	8	0.76544	0.756472	0.76544	0.756472	9.27933e-05	17.2	0	0.963	0.482
1145	LG5(N4)	61.87		0.91	6	0.765093	0.757386	0.765093	0.757386	9.76024e-05	12.9	0	0.991	0.495
1146	LG5(N4)	62.146	TTT-cgtc-200	0.87	4	0.764947	0.757714	0.764947	0.757714	9.92668e-05	11.4	0	1	0.5
1147	LG5(N4)	63.146		0.83	5	0.764907	0.757735	0.764907	0.757735	9.9498e-05	11.2	0	0.961	0.481
1148	LG5(N4)	64.146		0.78	5	0.76486	0.757766	0.76486	0.757766	9.97849e-05	10.9	0	0.928	0.464
1149	LG5(N4)	65.146		0.74	6	0.764807	0.75781	0.764807	0.75781	0.000100134	10.6	0	0.9	0.45
1150	LG5(N4)	66.146		0.69	6	0.764745	0.757868	0.764745	0.757868	0.000100551	10.3	0	0.878	0.439
1151	LG5(N4)	67.146		0.64	6	0.764675	0.757944	0.764675	0.757944	0.000101045	9.8	0	0.861	0.43
1152	LG5(N4)	68.146		0.59	7	0.764594	0.75804	0.764594	0.75804	0.000101624	9.3	0	0.848	0.424
1153	LG5(N4)	69.146		0.54	7	0.7645	0.758159	0.7645	0.758159	0.000102295	8.7	0	0.841	0.421
1154	LG5(N4)	70.146		0.49	7	0.764393	0.758306	0.764393	0.758306	0.000103063	8	0	0.84	0.42
1155	LG5(N4)	71.146		0.43	7	0.764269	0.758483	0.764269	0.758483	0.000103929	7.2	0	0.843	0.422
1156	LG5(N4)	72.146		0.38	7	0.764128	0.758693	0.764128	0.758693	0.00010488	6.4	0	0.852	0.426
1157	LG5(N4)	73.146		0.33	7	0.763969	0.758934	0.763969	0.758934	0.000105891	5.5	0	0.865	0.433
1158	LG5(N4)	74.146		0.28	7	0.763794	0.7592	0.763794	0.7592	0.000106915	4.6	0	0.884	0.442
1159	LG5(N4)	75.146		0.23	6	0.763608	0.75948	0.763608	0.75948	0.000107899	3.7	0	0.909	0.454
1160	LG5(N4)	76.146		0.19	5	0.763418	0.759763	0.763418	0.759763	0.000108789	2.9	0	0.938	0.469
1161	LG5(N4)	77.146		0.15	5	0.76323	0.760035	0.76323	0.760035	0.000109555	2.2	0	0.973	0.486
1162	LG5(N4)	77.838	GTG-cgat	0.13	4	0.763105	0.760214	0.763105	0.760214	0.000110004	1.8	0	1	0.5
1163	LG6(N4)	0	TCT-catt-190	0.13	4	0.763167	0.760333	0.763167	0.760333	0.000110056	1.8	0	0.996	0.498
1164	LG6(N4)	1		0.14	5	0.763229	0.760228	0.763229	0.760228	0.000109817	2	0	0.956	0.478
1165	LG6(N4)	2		0.14	5	0.763283	0.760131	0.763283	0.760131	0.000109591	2.2	0	0.925	0.462
1166	LG6(N4)	3		0.15	6	0.763326	0.760047	0.763326	0.760047	0.000109395	2.4	0	0.902	0.451
1167	LG6(N4)	4		0.15	6	0.763353	0.759982	0.763353	0.759982	0.000109249	2.5	0	0.889	0.444
1168	LG6(N4)	5		0.15	6	0.763362	0.759942	0.763362	0.759942	0.000109173	2.6	0	0.884	0.442
1169	LG6(N4)	6		0.15	6	0.76335	0.759934	0.76335	0.759934	0.000109186	2.6	0	0.889	0.444
1170	LG6(N4)	7		0.15	6	0.763312	0.759964	0.763312	0.759964	0.000109301	2.4	0	0.902	0.451
1171	LG6(N4)	8		0.14	6	0.76325	0.760034	0.76325	0.760034	0.000109516	2.3	0	0.924	0.462
1172	LG6(N4)	9		0.13	5	0.763165	0.76014	0.763165	0.76014	0.00010981	2	0	0.955	0.478
1173	LG6(N4)	10		0.12	4	0.763063	0.760272	0.763063	0.760272	0.000110143	1.7	0	0.996	0.498
1174	LG6(N4)	10.098	CaiSSRD09J21-150	0.12	4	0.763053	0.760286	0.763053	0.760286	0.000110176	1.7	0	1	0.5
1175	LG6(N4)	11.098		0.13	5	0.76313	0.760177	0.76313	0.760177	0.000109917	1.9	0	0.96	0.48
1176	LG6(N4)	12.098		0.14	5	0.763208	0.760066	0.763208	0.760066	0.000109635	2.2	0	0.923	0.462
1177	LG6(N4)	13.098		0.16	6	0.763288	0.759952	0.763288	0.759952	0.000109331	2.4	0	0.889	0.445
1178	LG6(N4)	14.098		0.17	6	0.763367	0.759838	0.763367	0.759838	0.000109009	2.7	0	0.859	0.43
1179	LG6(N4)	15.098		0.18	6	0.763445	0.759725	0.763445	0.759725	0.000108673	3	0	0.832	0.416
1180	LG6(N4)	16.098		0.2	6	0.763521	0.759614	0.763521	0.759614	0.000108328	3.3	0	0.808	0.404
1181	LG6(N4)	17.098		0.21	7	0.763594	0.759508	0.763594	0.759508	0.00010798	3.6	0	0.787	0.394
1182	LG6(N4)	18.098		0.23	7	0.763663	0.759407	0.763663	0.759407	0.000107637	3.9	0	0.769	0.385
1183	LG6(N4)	19.098		0.24	7	0.763728	0.759313	0.763728	0.759313	0.000107303	4.2	0	0.755	0.377
1184	LG6(N4)	20.098		0.26	7	0.763787	0.759227	0.763787	0.759227	0.000106984	4.5	0	0.743	0.371
1185	LG6(N4)	21.098		0.28	7	0.763842	0.759148	0.763842	0.759148	0.000106683	4.8	0	0.734	0.367
1186	LG6(N4)	22.098		0.29	7	0.763892	0.759077	0.763892	0.759077	0.000106405	5	0	0.729	0.364
1187	LG6(N4)	23.098		0.31	7	0.763937	0.759015	0.763937	0.759015	0.000106151	5.3	0	0.726	0.363
1188	LG6(N4)	24.098		0.32	7	0.763977	0.75896	0.763977	0.75896	0.000105922	5.5	0	0.726	0.363
1189	LG6(N4)	25.098		0.33	7	0.764013	0.758913	0.764013	0.758913	0.000105718	5.6	0	0.729	0.365
1190	LG6(N4)	26.098		0.35	7	0.764043	0.758873	0.764043	0.758873	0.00010554	5.8	0	0.735	0.368
1191	LG6(N4)	27.098		0.36	7	0.76407	0.75884	0.76407	0.75884	0.000105388	5.9	0	0.745	0.372
1192	LG6(N4)	28.098		0.37	7	0.764093	0.758814	0.764093	0.758814	0.000105259	6.1	0	0.757	0.378
1193	LG6(N4)	29.098		0.39	6	0.764112	0.758793	0.764112	0.758793	0.000105154	6.2	0	0.772	0.386
1194	LG6(N4)	30.098		0.4	6	0.764128	0.758777	0.764128	0.758777	0.000105071	6.2	0	0.79	0.395
1195	LG6(N4)	31.098		0.41	6	0.76414	0.758767	0.76414	0.758767	0.000105008	6.3	0	0.811	0.406
1196	LG6(N4)	32.098		0.42	6	0.76415	0.758761	0.76415	0.758761	0.000104966	6.3	0	0.836	0.418
1197	LG6(N4)	33.098		0.43	6	0.764156	0.758759	0.764156	0.758759	0.000104941	6.3	0	0.863	0.432
1198	LG6(N4)	34.098		0.44	5	0.76416	0.758761	0.76416	0.758761	0.000104934	6.3	0	0.894	0.447
1199	LG6(N4)	35.098		0.45	5	0.764162	0.758767	0.764162	0.758767	0.000104943	6.3	0	0.928	0.464
1200	LG6(N4)	36.098		0.46	5	0.764161	0.758776	0.764161	0.758776	0.000104966	6.3	0	0.966	0.483
1201	LG6(N4)	36.951	LmSSRH3-4F	0.47	4	0.764158	0.758786	0.764158	0.758786	0.000104996	6.3	0	1	0.5
1202	LG6(N4)	37.951		0.47	4	0.764158	0.758786	0.764158	0.758786	0.000104995	6.3	0	0.991	0.495
1203	LG6(N4)	38.302	CaiSSRB01D08-140	0.47	4	0.764158	0.758786	0.764158	0.758786	0.000104996	6.3	0	1	0.5
1204	LG6(N4)	39.169	GAC-ctac-160	0.12	4	0.763111	0.7604	0.763111	0.7604	0.000110224	1.6	0	1	0.5
1205	LG6(N4)	40.169		0.16	6	0.763373	0.759892	0.763373	0.759892	0.000109079	2.6	0	0.959	0.479
1206	LG6(N4)	41.169		0.19	6	0.76341	0.759674	0.76341	0.759674	0.000108669	3	0	0.956	0.478
1207	LG6(N4)	42.169		0.19	5	0.763281	0.759739	0.763281	0.759739	0.000109045	2.7	0	0.991	0.495
1208	LG6(N4)	42.336	CaiSSRA03M16-160	0.19	4	0.76325	0.759769	0.76325	0.759769	0.000109153	2.6	0	1	0.5
1209	LG6(N4)	43.336		0.19	6	0.763353	0.759594	0.763353	0.759594	0.000108676	3	0	0.959	0.479
1210	LG6(N4)	44.336		0.2	7	0.763459	0.759409	0.763459	0.759409	0.000108143	3.5	0	0.923	0.461
1211	LG6(N4)	45.336		0.21	8	0.763565	0.759223	0.763565	0.759223	0.000107568	4	0	0.891	0.445
1212	LG6(N4)	46.336		0.21	9	0.763663	0.759041	0.763663	0.759041	0.000106982	4.5	0	0.864	0.432
1213	LG6(N4)	47.336		0.21	10	0.76375	0.758873	0.76375	0.758873	0.000106422	5	0	0.842	0.421
1214	LG6(N4)	48.336		0.21	11	0.763818	0.758728	0.763818	0.758728	0.000105935	5.5	0	0.824	0.412
1215	LG6(N4)	49.336		0.21	11	0.763864	0.758615	0.763864	0.758615	0.000105569	5.8	0	0.81	0.405
1216	LG6(N4)	50.336		0.2	12	0.763882	0.758543	0.763882	0.758543	0.000105364	6	0	0.802	0.401
1217	LG6(N4)	51.336		0.19	13	0.763869	0.758523	0.763869	0.758523	0.000105369	6	0	0.797	0.399
1218	LG6(N4)	52.336		0.17	14	0.763816	0.758568	0.763816	0.758568	0.000105632	5.7	0	0.797	0.399
1219	LG6(N4)	53.336		0.15	14	0.763714	0.758698	0.763714	0.758698	0.000106208	5.2	0	0.802	0.401
1220	LG6(N4)	54.336		0.12	15	0.763552	0.758936	0.763552	0.758936	0.000107121	4.4	0	0.811	0.406
1221	LG6(N4)	55.336		0.1	15	0.763323	0.759298	0.763323	0.759298	0.00010832	3.3	0	0.825	0.412
1222	LG6(N4)	56.336		0.07	13	0.763045	0.759755	0.763045	0.759755	0.000109569	2.2	0	0.843	0.421
1223	LG6(N4)	57.336		0.05	11	0.762773	0.760219	0.762773	0.760219	0.000110562	1.3	0	0.866	0.433
1224	LG6(N4)	58.336		0.03	9	0.762544	0.760618	0.762544	0.760618	0.000111207	0.7	0	0.893	0.447
1225	LG6(N4)	59.336		0.02	7	0.762367	0.760936	0.762367	0.760936	0.000111586	0.4	0	0.925	0.463
1226	LG6(N4)	60.336		0.01	5	0.762232	0.761184	0.762232	0.761184	0.0001118	0.2	0	0.962	0.481
1227	LG6(N4)	61.265	GTC-cgcc-190	0.01	4	0.762136	0.761364	0.762136	0.761364	0.000111913	0.1	0	1	0.5
1228	LG6(N4)	61.841	GCG-cgcc	0.01	4	0.762136	0.761364	0.762136	0.761364	0.000111913	0.1	0	1	0.5
1229	LG6(N4)	62.841		0	4	0.762082	0.761492	0.762082	0.761492	0.000111967	0.1	0	0.962	0.481
1230	LG6(N4)	63.841		0	4	0.762022	0.76162	0.762022	0.76162	0.000112009	0	0	0.932	0.466
1231	LG6(N4)	64.841		0	4	0.761956	0.761745	0.761956	0.761745	0.000112036	0	0	0.909	0.455
1232	LG6(N4)	65.841		0	3	0.761886	0.761866	0.761886	0.761866	0.000112046	0	0	0.894	0.447
1233	LG6(N4)	66.841		0	4	0.761813	0.761983	0.761813	0.761983	0.000112039	0	0	0.886	0.443
1234	LG6(N4)	67.841		0	4	0.761737	0.762093	0.761737	0.762093	0.000112016	0	0	0.885	0.442
1235	LG6(N4)	68.841		0	4	0.761659	0.762196	0.761659	0.762196	0.000111976	0.1	0	0.891	0.446
1236	LG6(N4)	69.841		0.01	4	0.76158	0.76229	0.76158	0.76229	0.000111923	0.1	0	0.905	0.453
1237	LG6(N4)	70.841		0.01	4	0.761502	0.762376	0.761502	0.762376	0.000111859	0.2	0	0.927	0.463
1238	LG6(N4)	71.841		0.02	4	0.761425	0.762453	0.761425	0.762453	0.000111785	0.2	0	0.956	0.478
1239	LG6(N4)	72.841		0.02	4	0.761348	0.762521	0.761348	0.762521	0.000111705	0.3	0	0.992	0.496
1240	LG6(N4)	73.042	ATC-cggt140	0.02	4	0.761333	0.762533	0.761333	0.762533	0.000111689	0.3	0	1	0.5
1241	LG6(N4)	74.042		0.05	4	0.761065	0.762781	0.761065	0.762781	0.000111312	0.7	0	0.969	0.484
1242	LG6(N4)	75.042		0.08	5	0.760778	0.763007	0.760778	0.763007	0.000110804	1.1	0	0.953	0.477
1243	LG6(N4)	76.042		0.11	5	0.760485	0.763204	0.760485	0.763204	0.000110199	1.6	0	0.953	0.477
1244	LG6(N4)	77.042		0.16	4	0.760199	0.763369	0.760199	0.763369	0.000109543	2.2	0	0.969	0.485
1245	LG6(N4)	78.026	ATA-cctt350	0.2	4	0.759933	0.7635	0.759933	0.7635	0.000108892	2.8	0	1	0.5
1246	LG6(N4)	79.026		0.2	4	0.759933	0.763501	0.759933	0.763501	0.00010889	2.8	0	0.978	0.489
1247	LG6(N4)	80.026		0.2	4	0.759933	0.7635	0.759933	0.7635	0.00010889	2.8	0	0.982	0.491
1248	LG6(N4)	80.716	ATA-cgaa120	0.2	4	0.759933	0.7635	0.759933	0.7635	0.000108892	2.8	0	1	0.5
1249	LG6(N4)	81.716		0.2	4	0.759933	0.7635	0.759933	0.7635	0.000108892	2.8	0	0.991	0.496
1250	LG6(N4)	82.053	CaiSSRB04O03-270	0.2	4	0.759933	0.7635	0.759933	0.7635	0.000108892	2.8	0	1	0.5
1251	LG6(N4)	83.053		0.2	4	0.759933	0.7635	0.759933	0.7635	0.000108892	2.8	0	0.991	0.496
1252	LG6(N4)	83.362	CaiSSRB04O03-280	0.2	4	0.759933	0.7635	0.759933	0.7635	0.000108892	2.8	0	1	0.5
1253	LG6(N4)	84.362		0.2	4	0.759936	0.763509	0.759936	0.763509	0.00010888	2.8	0	0.965	0.483
1254	LG6(N4)	85.362		0.2	4	0.759943	0.763515	0.759943	0.763515	0.000108879	2.8	0	0.938	0.469
1255	LG6(N4)	86.362		0.2	5	0.759955	0.763519	0.759955	0.763519	0.000108892	2.8	0	0.917	0.459
1256	LG6(N4)	87.362		0.2	5	0.759972	0.76352	0.759972	0.76352	0.000108916	2.8	0	0.904	0.452
1257	LG6(N4)	88.362		0.19	5	0.759993	0.763519	0.759993	0.763519	0.000108952	2.8	0	0.897	0.449
1258	LG6(N4)	89.362		0.19	5	0.760018	0.763516	0.760018	0.763516	0.000108998	2.7	0	0.898	0.449
1259	LG6(N4)	90.362		0.19	5	0.760046	0.763511	0.760046	0.763511	0.000109055	2.7	0	0.905	0.453
1260	LG6(N4)	91.362		0.18	4	0.760079	0.763503	0.760079	0.763503	0.000109122	2.6	0	0.92	0.46
1261	LG6(N4)	92.362		0.18	4	0.760114	0.763494	0.760114	0.763494	0.000109196	2.5	0	0.941	0.471
1262	LG6(N4)	93.362		0.18	4	0.760153	0.763482	0.760153	0.763482	0.000109278	2.5	0	0.97	0.485
1263	LG6(N4)	94.22	AGG-cgtt420	0.17	4	0.760188	0.763471	0.760188	0.763471	0.000109354	2.4	0	1	0.5
1264	LG6(N4)	95.22		0.03	5	0.761182	0.762661	0.761182	0.762661	0.000111501	0.5	0	0.966	0.483
1265	LG6(N4)	95.542	LmSSR1-9G-200	0.01	4	0.761556	0.762267	0.761556	0.762267	0.000111921	0.1	0	1	0.5
1266	LG6(N4)	96.542		0.01	4	0.761544	0.762259	0.761544	0.762259	0.000111919	0.1	0	0.965	0.482
1267	LG6(N4)	97.542		0.01	4	0.761532	0.762251	0.761532	0.762251	0.000111917	0.1	0	0.989	0.494
1268	LG6(N4)	97.735	GTC-ccac-210	0.01	4	0.761529	0.76225	0.761529	0.76225	0.000111916	0.1	0	1	0.5
1269	LG6(N4)	98.051	GGT-cttt-150	0.17	4	0.760188	0.763471	0.760188	0.763471	0.000109354	2.4	0	1	0.5
1270	LG6(N4)	99.051		0.17	4	0.760187	0.763471	0.760187	0.763471	0.000109353	2.4	0	0.992	0.496
1271	LG6(N4)	99.309	LmSSR7-6H-180*	0.17	4	0.760188	0.763471	0.760188	0.763471	0.000109354	2.4	0	1	0.5
1272	LG6(N4)	100.309		0.16	4	0.76022	0.763408	0.76022	0.763408	0.000109509	2.3	0	0.97	0.485
1273	LG6(N4)	101.309		0.15	4	0.760256	0.763343	0.760256	0.763343	0.00010967	2.1	0	0.954	0.477
1274	LG6(N4)	102.309		0.14	4	0.760296	0.763275	0.760296	0.763275	0.000109836	2	0	0.952	0.476
1275	LG6(N4)	103.309		0.13	4	0.760339	0.763205	0.760339	0.763205	0.000110004	1.8	0	0.964	0.482
1276	LG6(N4)	104.309		0.12	4	0.760386	0.763133	0.760386	0.763133	0.000110174	1.7	0	0.99	0.495
1277	LG6(N4)	104.603	LmSSR2-5G-270	0.12	4	0.7604	0.763111	0.7604	0.763111	0.000110224	1.6	0	1	0.5
1278	LG6(N4)	105.208	AGG-cgtt140	0	3	0.761813	0.761941	0.761813	0.761941	0.000112042	0	0	1	0.5
1279	LG6(N4)	106.208		0	4	0.761598	0.762134	0.761598	0.762134	0.000111974	0.1	0	0.955	0.478
1280	LG6(N4)	107.208		0.01	5	0.761353	0.762342	0.761353	0.762342	0.000111802	0.2	0	0.919	0.459
1281	LG6(N4)	108.208		0.03	5	0.76108	0.762556	0.76108	0.762556	0.000111504	0.5	0	0.892	0.446
1282	LG6(N4)	109.208		0.05	6	0.760788	0.76277	0.760788	0.76277	0.000111074	0.9	0	0.873	0.436
1283	LG6(N4)	110.208		0.08	6	0.760492	0.762971	0.760492	0.762971	0.000110531	1.4	0	0.863	0.431
1284	LG6(N4)	111.208		0.11	6	0.760205	0.763151	0.760205	0.763151	0.000109916	1.9	0	0.862	0.431
1285	LG6(N4)	112.208		0.15	6	0.759938	0.763306	0.759938	0.763306	0.000109277	2.5	0	0.869	0.434
1286	LG6(N4)	113.208		0.19	6	0.759697	0.763433	0.759697	0.763433	0.000108655	3	0	0.885	0.442
1287	LG6(N4)	114.208		0.23	5	0.759483	0.763537	0.759483	0.763537	0.000108073	3.5	0	0.909	0.455
1288	LG6(N4)	115.208		0.28	5	0.759293	0.763619	0.759293	0.763619	0.000107546	4	0	0.943	0.471
1289	LG6(N4)	116.208		0.32	4	0.759125	0.763683	0.759125	0.763683	0.000107078	4.4	0	0.985	0.492
1290	LG6(N4)	116.521	LmSSR17-8D-700	0.33	4	0.759077	0.7637	0.759077	0.7637	0.000106943	4.6	0	1	0.5
1291	LG6(N4)	117.521		0.32	5	0.759147	0.763696	0.759147	0.763696	0.000107082	4.4	0	0.938	0.469
1292	LG6(N4)	118.521		0.3	5	0.759222	0.763688	0.759222	0.763688	0.00010724	4.3	0	0.884	0.442
1293	LG6(N4)	119.521		0.28	5	0.759301	0.763675	0.759301	0.763675	0.000107416	4.1	0	0.836	0.418
1294	LG6(N4)	120.521		0.27	5	0.759385	0.763658	0.759385	0.763658	0.000107609	4	0	0.794	0.397
1295	LG6(N4)	121.521		0.25	5	0.759474	0.763636	0.759474	0.763636	0.000107819	3.8	0	0.759	0.38
1296	LG6(N4)	122.521		0.24	5	0.759566	0.76361	0.759566	0.76361	0.000108043	3.6	0	0.731	0.366
1297	LG6(N4)	123.521		0.22	6	0.759663	0.763578	0.759663	0.763578	0.00010828	3.4	0	0.709	0.355
1298	LG6(N4)	124.521		0.2	6	0.759763	0.763542	0.759763	0.763542	0.000108527	3.1	0	0.694	0.347
1299	LG6(N4)	125.521		0.19	6	0.759866	0.7635	0.759866	0.7635	0.000108782	2.9	0	0.685	0.342
1300	LG6(N4)	126.521		0.17	6	0.759972	0.763454	0.759972	0.763454	0.000109042	2.7	0	0.682	0.341
1301	LG6(N4)	127.521		0.16	6	0.76008	0.763403	0.76008	0.763403	0.000109304	2.4	0	0.686	0.343
1302	LG6(N4)	128.521		0.14	6	0.760189	0.763348	0.760189	0.763348	0.000109563	2.2	0	0.696	0.348
1303	LG6(N4)	129.521		0.13	5	0.760298	0.763288	0.760298	0.763288	0.000109818	2	0	0.713	0.356
1304	LG6(N4)	130.521		0.11	5	0.760407	0.763225	0.760407	0.763225	0.000110065	1.8	0	0.736	0.368
1305	LG6(N4)	131.521		0.1	5	0.760515	0.763158	0.760515	0.763158	0.000110301	1.6	0	0.765	0.383
1306	LG6(N4)	132.521		0.09	5	0.760621	0.763089	0.760621	0.763089	0.000110524	1.4	0	0.801	0.401
1307	LG6(N4)	133.521		0.08	5	0.760725	0.763019	0.760725	0.763019	0.000110731	1.2	0	0.844	0.422
1308	LG6(N4)	134.521		0.07	4	0.760826	0.762946	0.760826	0.762946	0.000110922	1	0	0.893	0.446
1309	LG6(N4)	135.521		0.06	4	0.760923	0.762873	0.760923	0.762873	0.000111096	0.8	0	0.949	0.474
1310	LG6(N4)	136.344	GCG-cgcg-290	0.05	4	0.761	0.762813	0.761	0.762813	0.000111225	0.7	0	1	0.5
1311	LG6(N4)	137.2	LmSSRPere1	0.05	4	0.761	0.762813	0.761	0.762813	0.000111225	0.7	0	1	0.5
1312	LG6(N4)	138.2		0.05	4	0.760999	0.762826	0.760999	0.762826	0.000111212	0.7	0	0.962	0.481
1313	LG6(N4)	139.2		0.05	4	0.760997	0.762839	0.760997	0.762839	0.0001112	0.8	0	0.933	0.467
1314	LG6(N4)	140.2		0.05	4	0.760997	0.762852	0.760997	0.762852	0.000111187	0.8	0	0.913	0.457
1315	LG6(N4)	141.2		0.06	4	0.760996	0.762865	0.760996	0.762865	0.000111176	0.8	0	0.902	0.451
1316	LG6(N4)	142.2		0.06	4	0.760996	0.762878	0.760996	0.762878	0.000111164	0.8	0	0.899	0.449
1317	LG6(N4)	143.2		0.06	4	0.760996	0.76289	0.760996	0.76289	0.000111153	0.8	0	0.905	0.452
1318	LG6(N4)	144.2		0.06	4	0.760997	0.762902	0.760997	0.762902	0.000111143	0.8	0	0.919	0.46
1319	LG6(N4)	145.2		0.06	4	0.760998	0.762914	0.760998	0.762914	0.000111134	0.8	0	0.943	0.471
1320	LG6(N4)	146.2		0.06	4	0.760999	0.762926	0.760999	0.762926	0.000111125	0.8	0	0.975	0.487
1321	LG6(N4)	146.839	ATG-cgat250	0.06	4	0.761	0.762933	0.761	0.762933	0.000111119	0.8	0	1	0.5
1322	LG7(N4)	0	GAA-ctaa-250	0	3	0.761778	0.762	0.761778	0.762	0.000112034	0	0	1	0.5
1323	LG7(N4)	0	ATC-caac-290	0	3	0.761778	0.762	0.761778	0.762	0.000112034	0	0	1	0.5
1324	LG7(N4)	1		0	4	0.761665	0.762147	0.761665	0.762147	0.000111989	0.1	0	0.967	0.484
1325	LG7(N4)	2		0.01	4	0.761557	0.7623	0.761557	0.7623	0.000111911	0.1	0	0.97	0.485
1326	LG7(N4)	2.837	AAC-ccgt330	0.01	4	0.761474	0.762429	0.761474	0.762429	0.000111823	0.2	0	1	0.5
1327	LG7(N4)	3.837		0.06	5	0.761022	0.763054	0.761022	0.763054	0.00011104	0.9	0	0.95	0.475
1328	LG7(N4)	4.837		0.12	5	0.760631	0.7636	0.760631	0.7636	0.000109898	1.9	0	0.943	0.472
1329	LG7(N4)	5.837		0.19	5	0.760374	0.763932	0.760374	0.763932	0.000108956	2.8	0	0.98	0.49
1330	LG7(N4)	6.144	GGG-cttg	0.22	4	0.760316	0.764	0.760316	0.764	0.00010873	3	0	1	0.5
1331	LG7(N4)	7.144		0.21	4	0.760321	0.763962	0.760321	0.763962	0.000108802	2.9	0	0.967	0.483
1332	LG7(N4)	8.144		0.2	4	0.760328	0.763922	0.760328	0.763922	0.000108877	2.8	0	0.943	0.472
1333	LG7(N4)	9.144		0.2	4	0.760336	0.763882	0.760336	0.763882	0.000108955	2.8	0	0.929	0.464
1334	LG7(N4)	10.144		0.19	4	0.760344	0.76384	0.760344	0.76384	0.000109037	2.7	0	0.924	0.462
1335	LG7(N4)	11.144		0.19	4	0.760354	0.763797	0.760354	0.763797	0.000109121	2.6	0	0.929	0.465
1336	LG7(N4)	12.144		0.18	4	0.760365	0.763754	0.760365	0.763754	0.000109207	2.5	0	0.944	0.472
1337	LG7(N4)	13.144		0.18	4	0.760377	0.76371	0.760377	0.76371	0.000109296	2.5	0	0.968	0.484
1338	LG7(N4)	14.107	LmSSR10-7A	0.17	4	0.760389	0.763667	0.760389	0.763667	0.000109382	2.4	0	1	0.5
1339	LG7(N4)	15.107		0.19	4	0.760257	0.76368	0.760257	0.76368	0.000109125	2.6	0	0.978	0.489
1340	LG7(N4)	15.729	GTT-cgag-210	0.2	4	0.760176	0.763687	0.760176	0.763687	0.000108967	2.7	0	1	0.5
1341	LG7(N4)	15.729	GTT-cgag-220	0.2	4	0.760176	0.763687	0.760176	0.763687	0.000108967	2.7	0	1	0.5
1342	LG7(N4)	16.729		0.1	4	0.760714	0.763234	0.760714	0.763234	0.000110468	1.4	0	0.992	0.496
1343	LG7(N4)	16.997	AAT-cgct410	0.08	4	0.760889	0.763067	0.760889	0.763067	0.00011087	1	0	1	0.5
1344	LG7(N4)	17.566	ATA-cctt130	0.08	4	0.760889	0.763067	0.760889	0.763067	0.00011087	1	0	1	0.5
1345	LG7(N4)	18.566		0.08	4	0.760889	0.763067	0.760889	0.763067	0.00011087	1	0	0.992	0.496
1346	LG7(N4)	18.873	LmSSR18-5D*	0.08	4	0.760889	0.763067	0.760889	0.763067	0.00011087	1	0	1	0.5
1347	LG7(N4)	19.873		0.11	4	0.76062	0.763298	0.76062	0.763298	0.000110259	1.6	0	0.967	0.483
1348	LG7(N4)	20.873		0.15	5	0.760353	0.763503	0.760353	0.763503	0.000109568	2.2	0	0.952	0.476
1349	LG7(N4)	21.873		0.2	5	0.760101	0.763674	0.760101	0.763674	0.000108853	2.8	0	0.956	0.478
1350	LG7(N4)	22.873		0.25	4	0.759873	0.763813	0.759873	0.763813	0.000108167	3.5	0	0.978	0.489
1351	LG7(N4)	23.477	ATG-ctag-160	0.28	4	0.75975	0.763882	0.75975	0.763882	0.000107781	3.8	0	1	0.5
1352	LG7(N4)	24.477		0.2	5	0.760087	0.763653	0.760087	0.763653	0.000108868	2.8	0	0.965	0.482
1353	LG7(N4)	25.443	TAG-cctg-150	0.12	4	0.760529	0.763312	0.760529	0.763312	0.000110111	1.7	0	1	0.5
1354	LG7(N4)	26.443		0.12	4	0.760564	0.763248	0.760564	0.763248	0.000110246	1.6	0	0.956	0.478
1355	LG7(N4)	27.443		0.11	4	0.760601	0.76318	0.760601	0.76318	0.000110384	1.5	0	0.932	0.466
1356	LG7(N4)	28.443		0.1	4	0.760642	0.76311	0.760642	0.76311	0.000110523	1.4	0	0.929	0.464
1357	LG7(N4)	29.443		0.09	4	0.760686	0.763039	0.760686	0.763039	0.000110662	1.2	0	0.946	0.473
1358	LG7(N4)	30.443		0.08	4	0.760733	0.762966	0.760733	0.762966	0.0001108	1.1	0	0.984	0.492
1359	LG7(N4)	30.759	TAA-ctga-200	0.08	4	0.760749	0.762943	0.760749	0.762943	0.000110843	1.1	0	1	0.5
1360	LG7(N4)	31.759		0.06	4	0.760848	0.762872	0.760848	0.762872	0.000111023	0.9	0	0.95	0.475
1361	LG7(N4)	32.759		0.05	4	0.760953	0.762791	0.760953	0.762791	0.000111202	0.8	0	0.91	0.455
1362	LG7(N4)	33.759		0.04	5	0.761063	0.762701	0.761063	0.762701	0.000111375	0.6	0	0.881	0.44
1363	LG7(N4)	34.759		0.03	5	0.761176	0.762602	0.761176	0.762602	0.000111537	0.5	0	0.861	0.43
1364	LG7(N4)	35.759		0.02	5	0.761291	0.762497	0.761291	0.762497	0.000111683	0.3	0	0.851	0.426
1365	LG7(N4)	36.759		0.01	4	0.761408	0.762385	0.761408	0.762385	0.000111808	0.2	0	0.851	0.426
1366	LG7(N4)	37.759		0.01	4	0.761524	0.762269	0.761524	0.762269	0.000111907	0.1	0	0.862	0.431
1367	LG7(N4)	38.759		0	4	0.761637	0.76215	0.761637	0.76215	0.00011198	0.1	0	0.882	0.441
1368	LG7(N4)	39.759		0	4	0.761747	0.76203	0.761747	0.76203	0.000112026	0	0	0.912	0.456
1369	LG7(N4)	40.759		0	3	0.761851	0.761911	0.761851	0.761911	0.000112045	0	0	0.952	0.476
1370	LG7(N4)	41.707	TAT-ctat-390	0	3	0.761944	0.7618	0.761944	0.7618	0.000112041	0	0	1	0.5
1371	LG7(N4)	42.707		0.06	5	0.760905	0.762965	0.760905	0.762965	0.000110988	0.9	0	0.93	0.465
1372	LG7(N4)	43.544	GTC-cgct-260	0.19	4	0.760235	0.763625	0.760235	0.763625	0.000109176	2.6	0	1	0.5
1373	LG7(N4)	44.544		0.12	5	0.760466	0.763327	0.760466	0.763327	0.000109999	1.8	0	0.958	0.479
1374	LG7(N4)	45.544		0.05	7	0.760841	0.762901	0.760841	0.762901	0.000110986	0.9	0	0.934	0.467
1375	LG7(N4)	46.544		0.01	7	0.761429	0.762301	0.761429	0.762301	0.000111856	0.2	0	0.927	0.464
1376	LG7(N4)	47.544		0	6	0.762112	0.76167	0.762112	0.76167	0.000111997	0	0	0.939	0.469
1377	LG7(N4)	48.544		0.03	5	0.762651	0.761217	0.762651	0.761217	0.000111535	0.5	0	0.968	0.484
1378	LG7(N4)	49.257	TTA-ccga-100	0.06	4	0.762933	0.761	0.762933	0.761	0.000111119	0.8	0	1	0.5
1379	LG7(N4)	50.257		0.07	5	0.763038	0.760852	0.763038	0.760852	0.000110855	1.1	0	0.94	0.47
1380	LG7(N4)	51.257		0.08	7	0.763146	0.760686	0.763146	0.760686	0.000110533	1.3	0	0.891	0.445
1381	LG7(N4)	52.257		0.08	8	0.763251	0.760507	0.763251	0.760507	0.000110163	1.7	0	0.851	0.425
1382	LG7(N4)	53.257		0.09	9	0.763344	0.760324	0.763344	0.760324	0.000109768	2	0	0.821	0.41
1383	LG7(N4)	54.257		0.1	9	0.763415	0.760152	0.763415	0.760152	0.000109393	2.4	0	0.801	0.4
1384	LG7(N4)	55.257		0.1	10	0.763455	0.760005	0.763455	0.760005	0.000109093	2.6	0	0.79	0.395
1385	LG7(N4)	56.257		0.11	11	0.763453	0.759904	0.763453	0.759904	0.000108936	2.8	0	0.79	0.395
1386	LG7(N4)	57.257		0.1	11	0.763401	0.759866	0.763401	0.759866	0.000108981	2.7	0	0.799	0.399
1387	LG7(N4)	58.257		0.1	10	0.763293	0.75991	0.763293	0.75991	0.000109261	2.5	0	0.818	0.409
1388	LG7(N4)	59.257		0.09	10	0.763134	0.760038	0.763134	0.760038	0.000109735	2.1	0	0.846	0.423
1389	LG7(N4)	60.257		0.08	8	0.762944	0.76023	0.762944	0.76023	0.00011029	1.6	0	0.885	0.442
1390	LG7(N4)	61.257		0.07	6	0.762755	0.760443	0.762755	0.760443	0.000110787	1.1	0	0.933	0.467
1391	LG7(N4)	62.257		0.06	4	0.762591	0.760643	0.762591	0.760643	0.000111166	0.8	0	0.992	0.496
1392	LG7(N4)	62.387	GTC-ccac-190	0.05	4	0.762571	0.760667	0.762571	0.760667	0.000111206	0.7	0	1	0.5
1393	LG7(N4)	63.387		0.04	4	0.762467	0.760862	0.762467	0.760862	0.000111449	0.5	0	0.966	0.483
1394	LG7(N4)	64.387		0.02	5	0.762345	0.761084	0.762345	0.761084	0.000111676	0.3	0	0.94	0.47
1395	LG7(N4)	65.387		0.01	5	0.762205	0.761329	0.762205	0.761329	0.000111866	0.2	0	0.922	0.461
1396	LG7(N4)	66.387		0	5	0.762052	0.761592	0.762052	0.761592	0.000111996	0	0	0.913	0.456
1397	LG7(N4)	67.387		0	3	0.76189	0.76186	0.76189	0.76186	0.000112046	0	0	0.911	0.455
1398	LG7(N4)	68.387		0	5	0.761728	0.762121	0.761728	0.762121	0.00011201	0	0	0.917	0.458
1399	LG7(N4)	69.387		0.01	5	0.761573	0.762362	0.761573	0.762362	0.000111898	0.1	0	0.931	0.466
1400	LG7(N4)	70.387		0.02	4	0.761431	0.762579	0.761431	0.762579	0.000111732	0.3	0	0.953	0.477
1401	LG7(N4)	71.387		0.03	4	0.761303	0.762768	0.761303	0.762768	0.000111534	0.5	0	0.983	0.492
1402	LG7(N4)	71.844	LmSSR10-10D-140	0.04	4	0.76125	0.762846	0.76125	0.762846	0.000111438	0.5	0	1	0.5
1403	LG7(N4)	71.844	GAG-cacc-220	0.04	4	0.76125	0.762846	0.76125	0.762846	0.000111438	0.5	0	1	0.5
1404	LG7(N4)	71.844	GAG-cacc-230	0.04	4	0.76125	0.762846	0.76125	0.762846	0.000111438	0.5	0	1	0.5
1405	LG7(N4)	72.844		0.06	4	0.761095	0.763121	0.761095	0.763121	0.000111072	0.9	0	0.969	0.485
1406	LG7(N4)	73.844		0.09	5	0.76095	0.763393	0.76095	0.763393	0.000110639	1.3	0	0.954	0.477
1407	LG7(N4)	74.844		0.11	5	0.760823	0.763646	0.760823	0.763646	0.00011018	1.7	0	0.952	0.476
1408	LG7(N4)	75.844		0.14	5	0.760718	0.763866	0.760718	0.763866	0.000109738	2.1	0	0.965	0.483
1409	LG7(N4)	76.844		0.17	4	0.760633	0.764052	0.760633	0.764052	0.000109339	2.4	0	0.993	0.497
1410	LG7(N4)	77.036	GAG-ctag-200	0.18	4	0.760619	0.764083	0.760619	0.764083	0.000109269	2.5	0	1	0.5

## Sheet: FVFM20
Nr	Group	Position	Locus	LOD	# Iter.	mu_ac{00}	mu_ad{00}	mu_bc{00}	mu_bd{00}	Variance	% Expl.	GIC_1	GIC_2	GIC_m
1	LG1(K7)	0	TAT-ccaa-150	0	4	0.744846	0.744846	0.74625	0.74625	0.000912589	0.1	1	0	0.5
2	LG1(K7)	1		0	4	0.744966	0.744966	0.746178	0.746178	0.000912708	0	0.963	0	0.482
3	LG1(K7)	2		0	4	0.745087	0.745087	0.746104	0.746104	0.000912811	0	0.934	0	0.467
4	LG1(K7)	3		0	4	0.745207	0.745207	0.746028	0.746028	0.000912897	0	0.914	0	0.457
5	LG1(K7)	4		0	3	0.745327	0.745327	0.745951	0.745951	0.000912966	0	0.902	0	0.451
6	LG1(K7)	5		0	3	0.745445	0.745445	0.745872	0.745872	0.000913016	0	0.898	0	0.449
7	LG1(K7)	6		0	3	0.745562	0.745562	0.745792	0.745792	0.000913047	0	0.902	0	0.451
8	LG1(K7)	7		0	3	0.745677	0.745677	0.745711	0.745711	0.000913059	0	0.915	0	0.458
9	LG1(K7)	8		0	3	0.74579	0.74579	0.74563	0.74563	0.000913053	0	0.936	0	0.468
10	LG1(K7)	9		0	3	0.7459	0.7459	0.745549	0.745549	0.00091303	0	0.965	0	0.483
11	LG1(K7)	9.931	LmSSR16-6G-230	0	3	0.746	0.746	0.745474	0.745474	0.000912992	0	1	0	0.5
12	LG1(K7)	10.931		0	4	0.746287	0.746287	0.745268	0.745268	0.000912806	0	0.96	0	0.48
13	LG1(K7)	11.931		0	4	0.746584	0.746584	0.745061	0.745061	0.000912495	0.1	0.93	0	0.465
14	LG1(K7)	12.931		0.01	4	0.746886	0.746886	0.744854	0.744854	0.000912058	0.1	0.911	0	0.455
15	LG1(K7)	13.931		0.01	4	0.747193	0.747193	0.744651	0.744651	0.000911495	0.2	0.901	0	0.45
16	LG1(K7)	14.931		0.02	4	0.747502	0.747502	0.744453	0.744453	0.000910814	0.2	0.901	0	0.451
17	LG1(K7)	15.931		0.02	4	0.74781	0.74781	0.744261	0.744261	0.000910025	0.3	0.912	0	0.456
18	LG1(K7)	16.931		0.03	4	0.748116	0.748116	0.744077	0.744077	0.000909141	0.4	0.932	0	0.466
19	LG1(K7)	17.931		0.04	4	0.748418	0.748418	0.743902	0.743902	0.000908177	0.5	0.963	0	0.481
20	LG1(K7)	18.855	GTC-cttg-170	0.05	4	0.748692	0.748692	0.74375	0.74375	0.000907228	0.6	1	0	0.5
21	LG1(K7)	19.855		0.06	4	0.749166	0.749166	0.743493	0.743493	0.000905414	0.8	0.955	0	0.477
22	LG1(K7)	20.855		0.07	4	0.749639	0.749639	0.743249	0.743249	0.000903409	1.1	0.926	0	0.463
23	LG1(K7)	21.855		0.09	5	0.750099	0.750099	0.743022	0.743022	0.000901286	1.3	0.915	0	0.458
24	LG1(K7)	22.855		0.11	4	0.750535	0.750535	0.742817	0.742817	0.000899124	1.5	0.921	0	0.461
25	LG1(K7)	23.855		0.12	4	0.75094	0.75094	0.742634	0.742634	0.000896997	1.8	0.944	0	0.472
26	LG1(K7)	24.855		0.14	4	0.751311	0.751311	0.742473	0.742473	0.000894962	2	0.984	0	0.492
27	LG1(K7)	25.16	CaiSSRB01A19-150	0.15	4	0.751417	0.751417	0.742429	0.742429	0.000894365	2	1	0	0.5
28	LG1(K7)	26.16		0.15	4	0.751417	0.751417	0.742428	0.742428	0.000894364	2	0.982	0	0.491
29	LG1(K7)	26.505	ATC-caac-280	0.15	4	0.751417	0.751417	0.742429	0.742429	0.000894365	2	1	0	0.5
30	LG1(K7)	27.505		0.15	4	0.751476	0.751476	0.742321	0.742321	0.00089355	2.1	0.965	0	0.482
31	LG1(K7)	28.505		0.16	4	0.751532	0.751532	0.742213	0.742213	0.000892731	2.2	0.936	0	0.468
32	LG1(K7)	29.505		0.17	4	0.751587	0.751587	0.742106	0.742106	0.00089191	2.3	0.914	0	0.457
33	LG1(K7)	30.505		0.17	4	0.751639	0.751639	0.741999	0.741999	0.000891088	2.4	0.897	0	0.449
34	LG1(K7)	31.505		0.18	4	0.751689	0.751689	0.741894	0.741894	0.000890268	2.5	0.887	0	0.443
35	LG1(K7)	32.505		0.18	4	0.751737	0.751737	0.741788	0.741788	0.00088945	2.6	0.883	0	0.441
36	LG1(K7)	33.505		0.19	4	0.751783	0.751783	0.741684	0.741684	0.000888638	2.7	0.885	0	0.442
37	LG1(K7)	34.505		0.2	4	0.751827	0.751827	0.741582	0.741582	0.000887832	2.8	0.893	0	0.446
38	LG1(K7)	35.505		0.2	4	0.751869	0.751869	0.74148	0.74148	0.000887035	2.9	0.907	0	0.453
39	LG1(K7)	36.505		0.21	4	0.751908	0.751908	0.74138	0.74138	0.000886248	2.9	0.927	0	0.464
40	LG1(K7)	37.505		0.22	4	0.751945	0.751945	0.741282	0.741282	0.000885473	3	0.954	0	0.477
41	LG1(K7)	38.505		0.23	4	0.751981	0.751981	0.741185	0.741185	0.000884711	3.1	0.986	0	0.493
42	LG1(K7)	38.68	GCT-cgct-120	0.23	4	0.751986	0.751986	0.741169	0.741169	0.00088458	3.1	0.993	0	0.496
43	LG1(K7)	39.68		0.23	5	0.752077	0.752077	0.740884	0.740884	0.000882356	3.4	0.953	0	0.476
44	LG1(K7)	40.68		0.23	5	0.751889	0.751889	0.740803	0.740803	0.000882753	3.3	0.955	0	0.477
45	LG1(K7)	41.68		0.22	4	0.751404	0.751404	0.740943	0.740943	0.00088593	3	1	0	0.5
46	LG1(K7)	41.686	GTT-caat-170	0.22	4	0.7514	0.7514	0.740944	0.740944	0.000885956	3	1	0	0.5
47	LG1(K7)	42.686		0.2	5	0.751422	0.751422	0.740972	0.740972	0.00088601	3	0.938	0	0.469
48	LG1(K7)	43.686		0.18	5	0.751062	0.751062	0.741263	0.741263	0.000889272	2.6	0.935	0	0.468
49	LG1(K7)	44.686		0.15	4	0.750407	0.750407	0.741776	0.741776	0.000894592	2	0.992	0	0.496
50	LG1(K7)	44.782	GTT-cgag-400	0.14	4	0.750333	0.750333	0.741833	0.741833	0.000895146	2	1	0	0.5
51	LG1(K7)	45.782		0.1	6	0.749811	0.749811	0.742061	0.742061	0.0008981	1.6	0.964	0	0.482
52	LG1(K7)	46.782		0.05	8	0.749005	0.749005	0.742586	0.742586	0.000902767	1.1	0.937	0	0.469
53	LG1(K7)	47.782		0.01	12	0.747474	0.747474	0.7439	0.7439	0.000909867	0.3	0.92	0	0.46
54	LG1(K7)	48.782		0.01	20	0.743427	0.743427	0.748269	0.748269	0.00090722	0.6	0.912	0	0.456
55	LG1(K7)	49.782		0.08	12	0.741451	0.741451	0.750941	0.750941	0.000890797	2.4	0.914	0	0.457
56	LG1(K7)	50.782		0.15	8	0.740858	0.740858	0.752073	0.752073	0.000882205	3.4	0.925	0	0.462
57	LG1(K7)	51.782		0.22	7	0.740644	0.740644	0.75276	0.75276	0.000877373	3.9	0.945	0	0.473
58	LG1(K7)	52.782		0.28	5	0.740611	0.740611	0.753229	0.753229	0.000874753	4.2	0.975	0	0.488
59	LG1(K7)	53.44	TAG-ctgg-300	0.31	4	0.74065	0.74065	0.753462	0.753462	0.000873872	4.3	1	0	0.5
60	LG1(K7)	54.44		0.43	5	0.739467	0.739467	0.754431	0.754431	0.000858649	6	0.825	0	0.413
61	LG1(K7)	55.44		0.53	4	0.738791	0.738791	0.755069	0.755069	0.000848341	7.1	0.998	0	0.499
62	LG1(K7)	55.445	TGG-cggg-310	0.53	4	0.738789	0.738789	0.755071	0.755071	0.000848306	7.1	1	0	0.5
63	LG1(K7)	56.445		0.42	5	0.739554	0.739554	0.75447	0.75447	0.000859161	5.9	0.872	0	0.436
64	LG1(K7)	57.445		0.31	5	0.740607	0.740607	0.753616	0.753616	0.000872753	4.4	0.855	0	0.428
65	LG1(K7)	58.445		0.2	4	0.741825	0.741825	0.752452	0.752452	0.000886906	2.9	0.951	0	0.475
66	LG1(K7)	58.696	TAG-cgga-140	0.18	4	0.742136	0.742136	0.752112	0.752112	0.000890214	2.5	0.992	0	0.496
67	LG1(K7)	59.595	CaiSSRB06A04-220	0.46	4	0.739263	0.739263	0.754429	0.754429	0.000856882	6.2	1	0	0.5
68	LG1(K7)	60.419	CaiSSRB06A04-210	0.36	4	0.740667	0.740667	0.7545	0.7545	0.000868778	4.8	1	0	0.5
69	LG1(K7)	61.419		0.41	4	0.740087	0.740087	0.754832	0.754832	0.000861812	5.6	0.953	0	0.477
70	LG1(K7)	62.419		0.46	4	0.739611	0.739611	0.755071	0.755071	0.000856011	6.2	0.998	0	0.499
71	LG1(K7)	62.446	GTG-ccag-120	0.46	4	0.7396	0.7396	0.755077	0.755077	0.00085587	6.3	1	0	0.5
72	LG1(K7)	63.446		0.35	5	0.74055	0.74055	0.754297	0.754297	0.0008688	4.8	0.972	0	0.486
73	LG1(K7)	63.83	GCG-cgcg-150	0.3	4	0.741048	0.741048	0.753833	0.753833	0.000875231	4.1	1	0	0.5
74	LG1(K7)	63.869	LmSSR18-2B-190*	0.3	4	0.741048	0.741048	0.753833	0.753833	0.000875231	4.1	1	0	0.5
75	LG1(K7)	64.57	TAC-cctc-310	0.46	4	0.7396	0.7396	0.755077	0.755077	0.00085587	6.3	1	0	0.5
76	LG1(K7)	64.694	CaiSSRB02M22-300	0.46	4	0.7396	0.7396	0.755077	0.755077	0.00085587	6.3	1	0	0.5
77	LG1(K7)	64.694	TCT-cgtt-150	0.46	4	0.7396	0.7396	0.755077	0.755077	0.00085587	6.3	1	0	0.5
78	LG1(K7)	64.694	CaiSSRD03H10-230	0.46	4	0.7396	0.7396	0.755077	0.755077	0.00085587	6.3	1	0	0.5
79	LG1(K7)	64.694	ATA-cgaa130	0.46	4	0.7396	0.7396	0.755077	0.755077	0.00085587	6.3	1	0	0.5
80	LG1(K7)	64.694	AGC-cgat240	0.46	4	0.7396	0.7396	0.755077	0.755077	0.00085587	6.3	1	0	0.5
81	LG1(K7)	65.582	CaiSSRB02M22-320	0.46	4	0.739263	0.739263	0.754429	0.754429	0.000856882	6.2	1	0	0.5
82	LG1(K7)	65.582	LmSSR13-2H	0.46	4	0.739263	0.739263	0.754429	0.754429	0.000856882	6.2	1	0	0.5
83	LG1(K7)	65.582	TTG-ctcg-170	0.46	4	0.739263	0.739263	0.754429	0.754429	0.000856882	6.2	1	0	0.5
84	LG1(K7)	65.582	AGT-cgat300	0.46	4	0.739263	0.739263	0.754429	0.754429	0.000856882	6.2	1	0	0.5
85	LG1(K7)	66.523	TCC-catc-360	0.46	4	0.739263	0.739263	0.754429	0.754429	0.000856882	6.2	1	0	0.5
86	LG1(K7)	67.523		0.45	4	0.739418	0.739418	0.754592	0.754592	0.000857201	6.1	0.936	0	0.468
87	LG1(K7)	68.523		0.45	4	0.739571	0.739571	0.754767	0.754767	0.000857497	6.1	0.941	0	0.47
88	LG1(K7)	69.383	TTT-cgtc-400	0.45	4	0.7397	0.7397	0.754923	0.754923	0.000857731	6.1	1	0	0.5
89	LG1(K7)	70.383		0.49	5	0.739105	0.739105	0.755036	0.755036	0.000851494	6.7	0.895	0	0.448
90	LG1(K7)	71.383		0.53	4	0.738796	0.738796	0.755072	0.755072	0.000848361	7.1	0.991	0	0.495
91	LG1(K7)	71.429	LmSSR1-6G	0.53	4	0.738789	0.738789	0.755071	0.755071	0.000848306	7.1	1	0	0.5
92	LG1(K7)	72.429		0.27	8	0.739005	0.739005	0.753428	0.753428	0.000861328	5.7	0.867	0	0.433
93	LG1(K7)	73.429		0	6	0.745602	0.745602	0.745785	0.745785	0.000913051	0	0.905	0	0.452
94	LG1(K7)	73.986	CaiSSRD09J21-170	0.04	4	0.748067	0.748067	0.743722	0.743722	0.00090838	0.5	1	0	0.5
95	LG1(K7)	74.986		0.03	5	0.747999	0.747999	0.743782	0.743782	0.000908651	0.5	0.87	0	0.435
96	LG1(K7)	75.986		0.03	5	0.747836	0.747836	0.743919	0.743919	0.000909256	0.4	0.824	0	0.412
97	LG1(K7)	76.986		0.02	4	0.747591	0.747591	0.744121	0.744121	0.000910076	0.3	0.862	0	0.431
98	LG1(K7)	77.986		0.02	4	0.747295	0.747295	0.744366	0.744366	0.000910932	0.2	0.985	0	0.492
99	LG1(K7)	78.077	TAA-caga-600	0.02	4	0.747267	0.747267	0.744389	0.744389	0.000911006	0.2	1	0	0.5
100	LG1(K7)	79.077		0	6	0.746443	0.746443	0.745056	0.745056	0.000912581	0.1	0.907	0	0.453
101	LG1(K7)	80.077		0	9	0.744941	0.744941	0.74637	0.74637	0.000912551	0.1	0.832	0	0.416
102	LG1(K7)	81.077		0.04	24	0.740832	0.740832	0.750271	0.750271	0.000890805	2.4	0.775	0	0.387
103	LG1(K7)	82.077		0.14	14	0.738409	0.738409	0.752782	0.752782	0.000861427	5.7	0.736	0	0.368
104	LG1(K7)	83.077		0.24	11	0.737636	0.737636	0.753702	0.753702	0.00084853	7.1	0.716	0	0.358
105	LG1(K7)	84.077		0.33	9	0.737277	0.737277	0.754238	0.754238	0.000841148	7.9	0.713	0	0.356
106	LG1(K7)	85.077		0.41	8	0.737125	0.737125	0.754603	0.754603	0.000836718	8.4	0.728	0	0.364
107	LG1(K7)	86.077		0.48	7	0.737109	0.737109	0.754868	0.754868	0.000834301	8.6	0.762	0	0.381
108	LG1(K7)	87.077		0.53	6	0.737195	0.737195	0.755064	0.755064	0.000833422	8.7	0.814	0	0.407
109	LG1(K7)	88.077		0.58	6	0.737361	0.737361	0.755208	0.755208	0.000833777	8.7	0.883	0	0.442
110	LG1(K7)	89.077		0.62	5	0.737591	0.737591	0.755311	0.755311	0.000835136	8.5	0.972	0	0.486
111	LG1(K7)	89.361	GTT-caat-120	0.63	4	0.737667	0.737667	0.755333	0.755333	0.000835677	8.5	1	0	0.5
112	LG2(K7)	0	TAA-cggg	0.15	4	0.742	0.742	0.750714	0.750714	0.000894511	2	1	0	0.5
113	LG2(K7)	1		0.08	5	0.742824	0.742824	0.749379	0.749379	0.00090248	1.2	0.976	0	0.488
114	LG2(K7)	1.886	AAC-ccgt180	0.03	4	0.743833	0.743833	0.747933	0.747933	0.000908892	0.5	1	0	0.5
115	LG2(K7)	2.886		0.03	4	0.744048	0.744048	0.747756	0.747756	0.000909664	0.4	0.968	0	0.484
116	LG2(K7)	3.886		0.02	4	0.744262	0.744262	0.747564	0.747564	0.00091038	0.3	0.968	0	0.484
117	LG2(K7)	4.886		0.02	4	0.744473	0.744473	0.747358	0.747358	0.000911026	0.2	1	0	0.5
118	LG2(K7)	4.891	TAC-ccag-250	0.02	4	0.744474	0.744474	0.747357	0.747357	0.000911029	0.2	1	0	0.5
119	LG2(K7)	5.891		0.01	4	0.744639	0.744639	0.747138	0.747138	0.000911536	0.2	0.962	0	0.481
120	LG2(K7)	6.891		0.01	4	0.744814	0.744814	0.746904	0.746904	0.000911994	0.1	0.928	0	0.464
121	LG2(K7)	7.891		0	4	0.744997	0.744997	0.746658	0.746658	0.000912387	0.1	0.897	0	0.449
122	LG2(K7)	8.891		0	4	0.745188	0.745188	0.746398	0.746398	0.000912703	0	0.87	0	0.435
123	LG2(K7)	9.891		0	4	0.745387	0.745387	0.746126	0.746126	0.000912927	0	0.846	0	0.423
124	LG2(K7)	10.891		0	4	0.745592	0.745592	0.745842	0.745842	0.000913044	0	0.825	0	0.413
125	LG2(K7)	11.891		0	4	0.745804	0.745804	0.745548	0.745548	0.000913044	0	0.808	0	0.404
126	LG2(K7)	12.891		0	5	0.74602	0.74602	0.745244	0.745244	0.000912913	0	0.794	0	0.397
127	LG2(K7)	13.891		0	5	0.74624	0.74624	0.744932	0.744932	0.000912644	0	0.783	0	0.391
128	LG2(K7)	14.891		0.01	5	0.746462	0.746462	0.744613	0.744613	0.00091223	0.1	0.775	0	0.388
129	LG2(K7)	15.891		0.01	5	0.746686	0.746686	0.744291	0.744291	0.00091167	0.2	0.771	0	0.385
130	LG2(K7)	16.891		0.01	6	0.746908	0.746908	0.743966	0.743966	0.000910964	0.2	0.769	0	0.385
131	LG2(K7)	17.891		0.02	6	0.747127	0.747127	0.743641	0.743641	0.00091012	0.3	0.771	0	0.386
132	LG2(K7)	18.891		0.03	6	0.747342	0.747342	0.74332	0.74332	0.000909149	0.4	0.776	0	0.388
133	LG2(K7)	19.891		0.03	6	0.747551	0.747551	0.743004	0.743004	0.000908068	0.5	0.785	0	0.392
134	LG2(K7)	20.891		0.04	6	0.74775	0.74775	0.742697	0.742697	0.000906899	0.7	0.796	0	0.398
135	LG2(K7)	21.891		0.05	6	0.74794	0.74794	0.7424	0.7424	0.000905666	0.8	0.811	0	0.405
136	LG2(K7)	22.891		0.06	6	0.748118	0.748118	0.742118	0.742118	0.000904396	0.9	0.829	0	0.414
137	LG2(K7)	23.891		0.07	6	0.748281	0.748281	0.741852	0.741852	0.000903121	1.1	0.85	0	0.425
138	LG2(K7)	24.891		0.08	5	0.74843	0.74843	0.741604	0.741604	0.000901871	1.2	0.875	0	0.437
139	LG2(K7)	25.891		0.09	5	0.748564	0.748564	0.741375	0.741375	0.000900671	1.4	0.902	0	0.451
140	LG2(K7)	26.891		0.1	5	0.74868	0.74868	0.741168	0.741168	0.000899549	1.5	0.934	0	0.467
141	LG2(K7)	27.891		0.11	4	0.74878	0.74878	0.740983	0.740983	0.000898526	1.6	0.969	0	0.484
142	LG2(K7)	28.72	GTA-cggt-350	0.12	4	0.74885	0.74885	0.740846	0.740846	0.000897765	1.7	1	0	0.5
143	LG2(K7)	29.72		0.07	5	0.7482	0.7482	0.741854	0.741854	0.000903443	1.1	0.964	0	0.482
144	LG2(K7)	30.72		0.03	5	0.747415	0.747415	0.743059	0.743059	0.000908526	0.5	0.952	0	0.476
145	LG2(K7)	31.72		0.01	4	0.746563	0.746563	0.744366	0.744366	0.000911907	0.1	0.965	0	0.483
146	LG2(K7)	32.646	GTA-ccaa-150	0	3	0.7458	0.7458	0.745538	0.745538	0.000913043	0	1	0	0.5
147	LG2(K7)	32.646	TAA-ccta-120	0	3	0.7458	0.7458	0.745538	0.745538	0.000913043	0	1	0	0.5
148	LG2(K7)	33.646		0.49	8	0.753741	0.753741	0.734505	0.734505	0.000823034	9.9	0.965	0	0.482
149	LG2(K7)	34.646		0.87	4	0.75451	0.75451	0.733723	0.733723	0.00080754	11.6	0.998	0	0.499
150	LG2(K7)	34.678	LmSSR2-11G	0.88	4	0.754526	0.754526	0.733714	0.733714	0.00080726	11.6	1	0	0.5
151	LG2(K7)	34.978	GGT-cttt-110	0.62	4	0.753667	0.753667	0.736133	0.736133	0.00083684	8.3	1	0	0.5
152	LG2(K7)	35.173	LmSSR9-7G-220*	0.62	4	0.753667	0.753667	0.736133	0.736133	0.00083684	8.3	1	0	0.5
153	LG2(K7)	35.173	GTT-cgag-200	0.62	4	0.753667	0.753667	0.736133	0.736133	0.00083684	8.3	1	0	0.5
154	LG2(K7)	35.173	TTT-ccca-350	0.62	4	0.753667	0.753667	0.736133	0.736133	0.00083684	8.3	1	0	0.5
155	LG2(K7)	35.173	AAG-cacg-410	0.62	4	0.753667	0.753667	0.736133	0.736133	0.00083684	8.3	1	0	0.5
156	LG2(K7)	36.14	LmSSR1-10A-280	0.61	4	0.753105	0.753105	0.735643	0.735643	0.000838576	8.2	1	0	0.5
157	LG2(K7)	36.432	TTC-cccg-290	0.61	4	0.753105	0.753105	0.735643	0.735643	0.000838576	8.2	1	0	0.5
158	LG2(K7)	36.432	AGG-cgtt450	0.61	4	0.753105	0.753105	0.735643	0.735643	0.000838576	8.2	1	0	0.5
159	LG2(K7)	36.873	LmSSR15-11G-130	0.88	4	0.754526	0.754526	0.733714	0.733714	0.00080726	11.6	1	0	0.5
160	LG2(K7)	37.503	TAA-caga-580	0.61	4	0.753105	0.753105	0.735643	0.735643	0.000838576	8.2	1	0	0.5
161	LG2(K7)	37.678	GGA-cgaa	0.61	4	0.753105	0.753105	0.735643	0.735643	0.000838576	8.2	1	0	0.5
162	LG2(K7)	38.162	GAC-cccc-210	0.87	4	0.75395	0.75395	0.733	0.733	0.000808271	11.5	1	0	0.5
163	LG2(K7)	38.162	ATA-cctt240	0.87	4	0.75395	0.75395	0.733	0.733	0.000808271	11.5	1	0	0.5
164	LG2(K7)	38.162	AGG-cgtt290	0.87	4	0.75395	0.75395	0.733	0.733	0.000808271	11.5	1	0	0.5
165	LG2(K7)	38.881	LmSSR4-8H	1.31	4	0.756316	0.756316	0.731286	0.731286	0.00076003	16.8	1	0	0.5
166	LG2(K7)	39.881		0.9	6	0.754979	0.754979	0.733196	0.733196	0.00079702	12.7	0.957	0	0.478
167	LG2(K7)	40.453	LmSSRHL5D12*	0.61	4	0.753105	0.753105	0.735643	0.735643	0.000838576	8.2	1	0	0.5
168	LG2(K7)	40.927	CaiSSRD02N07	0.61	4	0.753105	0.753105	0.735643	0.735643	0.000838576	8.2	1	0	0.5
169	LG2(K7)	41.207	LmSSR13-11B*	0.44	4	0.752444	0.752444	0.7376	0.7376	0.000858426	6	1	0	0.5
170	LG2(K7)	42.03	TTT-ccgt	0.61	4	0.753105	0.753105	0.735643	0.735643	0.000838576	8.2	1	0	0.5
171	LG2(K7)	43.003	ATT-cgtt500	0.61	4	0.753105	0.753105	0.735643	0.735643	0.000838576	8.2	1	0	0.5
172	LG2(K7)	44.003		0.61	4	0.753106	0.753106	0.735642	0.735642	0.00083856	8.2	0.951	0	0.476
173	LG2(K7)	45.003		0.61	4	0.753106	0.753106	0.735642	0.735642	0.000838558	8.2	0.942	0	0.471
174	LG2(K7)	46.003		0.61	4	0.753106	0.753106	0.735642	0.735642	0.000838567	8.2	0.973	0	0.487
175	LG2(K7)	46.449	TTG-ctcg-140	0.61	4	0.753105	0.753105	0.735643	0.735643	0.000838576	8.2	1	0	0.5
176	LG3(K7)	0	LmSSR1-10A-220	0.56	4	0.753765	0.753765	0.737125	0.737125	0.000843903	7.6	1	0	0.5
177	LG3(K7)	1		0.5	5	0.75351	0.75351	0.737655	0.737655	0.000850226	6.9	0.967	0	0.484
178	LG3(K7)	2		0.43	5	0.753142	0.753142	0.738366	0.738366	0.000858477	6	0.971	0	0.486
179	LG3(K7)	2.781	ATG-caag-280	0.38	4	0.75275	0.75275	0.739059	0.739059	0.000866241	5.1	1	0	0.5
180	LG3(K7)	3.781		0.37	5	0.752726	0.752726	0.739073	0.739073	0.000866505	5.1	0.958	0	0.479
181	LG3(K7)	4.781		0.36	5	0.752691	0.752691	0.739107	0.739107	0.000866974	5	0.922	0	0.461
182	LG3(K7)	5.781		0.35	5	0.752645	0.752645	0.73916	0.73916	0.000867643	5	0.892	0	0.446
183	LG3(K7)	6.781		0.34	5	0.752589	0.752589	0.739232	0.739232	0.000868506	4.9	0.868	0	0.434
184	LG3(K7)	7.781		0.33	5	0.752522	0.752522	0.739322	0.739322	0.000869554	4.8	0.849	0	0.425
185	LG3(K7)	8.781		0.32	5	0.752445	0.752445	0.73943	0.73943	0.000870776	4.6	0.837	0	0.418
186	LG3(K7)	9.781		0.31	5	0.752357	0.752357	0.739555	0.739555	0.000872158	4.5	0.83	0	0.415
187	LG3(K7)	10.781		0.29	5	0.752259	0.752259	0.739696	0.739696	0.000873683	4.3	0.829	0	0.415
188	LG3(K7)	11.781		0.28	5	0.752151	0.752151	0.739851	0.739851	0.000875333	4.1	0.834	0	0.417
189	LG3(K7)	12.781		0.27	5	0.752033	0.752033	0.740019	0.740019	0.000877089	3.9	0.845	0	0.423
190	LG3(K7)	13.781		0.26	5	0.751905	0.751905	0.740199	0.740199	0.000878928	3.7	0.862	0	0.431
191	LG3(K7)	14.781		0.25	5	0.751769	0.751769	0.740389	0.740389	0.000880829	3.5	0.884	0	0.442
192	LG3(K7)	15.781		0.23	5	0.751624	0.751624	0.740586	0.740586	0.000882769	3.3	0.912	0	0.456
193	LG3(K7)	16.781		0.22	4	0.751471	0.751471	0.74079	0.74079	0.000884726	3.1	0.947	0	0.473
194	LG3(K7)	17.781		0.21	4	0.751311	0.751311	0.740998	0.740998	0.00088668	2.9	0.987	0	0.494
195	LG3(K7)	18.053	TAT-cctt-130	0.21	4	0.751267	0.751267	0.741056	0.741056	0.000887208	2.8	0.999	0	0.5
196	LG3(K7)	19.053		0.19	4	0.751178	0.751178	0.741239	0.741239	0.000888624	2.7	0.965	0	0.482
197	LG3(K7)	20.053		0.18	4	0.75108	0.75108	0.741427	0.741427	0.000890072	2.5	0.937	0	0.468
198	LG3(K7)	21.053		0.17	4	0.750972	0.750972	0.741619	0.741619	0.000891547	2.4	0.914	0	0.457
199	LG3(K7)	22.053		0.15	5	0.750855	0.750855	0.741815	0.741815	0.000893038	2.2	0.897	0	0.449
200	LG3(K7)	23.053		0.14	5	0.750727	0.750727	0.742014	0.742014	0.000894538	2	0.886	0	0.443
201	LG3(K7)	24.053		0.13	5	0.750588	0.750588	0.742216	0.742216	0.000896036	1.9	0.881	0	0.44
202	LG3(K7)	25.053		0.12	5	0.750439	0.750439	0.74242	0.74242	0.000897523	1.7	0.881	0	0.44
203	LG3(K7)	26.053		0.11	5	0.750278	0.750278	0.742625	0.742625	0.000898987	1.5	0.887	0	0.443
204	LG3(K7)	27.053		0.1	4	0.750107	0.750107	0.74283	0.74283	0.000900416	1.4	0.899	0	0.449
205	LG3(K7)	28.053		0.09	4	0.749925	0.749925	0.743034	0.743034	0.000901801	1.2	0.916	0	0.458
206	LG3(K7)	29.053		0.08	4	0.749733	0.749733	0.743237	0.743237	0.00090313	1.1	0.939	0	0.47
207	LG3(K7)	30.053		0.07	4	0.74953	0.74953	0.743436	0.743436	0.000904394	0.9	0.968	0	0.484
208	LG3(K7)	30.984	GTT-ccat-210	0.06	4	0.749333	0.749333	0.743619	0.743619	0.000905504	0.8	1	0	0.5
209	LG3(K7)	31.984		0.06	4	0.74924	0.74924	0.743662	0.743662	0.000905851	0.8	0.934	0	0.467
210	LG3(K7)	32.984		0.05	4	0.749137	0.749137	0.743714	0.743714	0.000906236	0.7	0.882	0	0.441
211	LG3(K7)	33.984		0.05	4	0.749025	0.749025	0.743773	0.743773	0.000906655	0.7	0.843	0	0.421
212	LG3(K7)	34.984		0.04	4	0.748905	0.748905	0.74384	0.74384	0.000907101	0.7	0.817	0	0.409
213	LG3(K7)	35.984		0.04	4	0.748776	0.748776	0.743913	0.743913	0.000907567	0.6	0.806	0	0.403
214	LG3(K7)	36.984		0.04	4	0.74864	0.74864	0.743993	0.743993	0.000908044	0.5	0.807	0	0.404
215	LG3(K7)	37.984		0.03	4	0.748498	0.748498	0.744078	0.744078	0.000908525	0.5	0.822	0	0.411
216	LG3(K7)	38.984		0.03	4	0.748349	0.748349	0.744167	0.744167	0.000909002	0.4	0.851	0	0.425
217	LG3(K7)	39.984		0.03	4	0.748196	0.748196	0.74426	0.74426	0.000909468	0.4	0.892	0	0.446
218	LG3(K7)	40.984		0.02	4	0.748039	0.748039	0.744355	0.744355	0.000909915	0.3	0.948	0	0.474
219	LG3(K7)	41.755	LmSSR1-8H-600	0.02	4	0.747917	0.747917	0.744429	0.744429	0.000910244	0.3	1	0	0.5
220	LG3(K7)	42.755		0.03	4	0.748419	0.748419	0.74405	0.74405	0.000908576	0.5	0.947	0	0.474
221	LG3(K7)	43.755		0.05	4	0.748876	0.748876	0.743664	0.743664	0.000906599	0.7	0.92	0	0.46
222	LG3(K7)	44.755		0.07	4	0.749277	0.749277	0.743287	0.743287	0.000904431	0.9	0.919	0	0.459
223	LG3(K7)	45.755		0.08	4	0.749619	0.749619	0.742932	0.742932	0.000902213	1.2	0.943	0	0.472
224	LG3(K7)	46.755		0.1	4	0.749902	0.749902	0.742611	0.742611	0.000900081	1.4	0.993	0	0.497
225	LG3(K7)	46.861	GCG-cgcg-250	0.1	4	0.749929	0.749929	0.742579	0.742579	0.000899865	1.4	1	0	0.5
226	LG3(K7)	47.028	LmSSR18-11E	0.1	4	0.749667	0.749667	0.742389	0.742389	0.000899928	1.4	1	0	0.5
227	LG3(K7)	47.951	CaiSSRB08J20	0	3	0.7462	0.7462	0.745278	0.745278	0.000912849	0	1	0	0.5
228	LG3(K7)	48.697	TAA-caga-250	0.06	4	0.749	0.749	0.743263	0.743263	0.000905021	0.9	1	0	0.5
229	LG3(K7)	49.559	ATA-caaa-250	0.01	4	0.747385	0.747385	0.7446	0.7446	0.000911208	0.2	1	0	0.5
230	LG3(K7)	50.118	TTC-cgtc-160	0.01	4	0.7475	0.7475	0.744667	0.744667	0.000911202	0.2	1	0	0.5
231	LG3(K7)	50.989	TAC-ccag-280	0	3	0.745077	0.745077	0.7461	0.7461	0.00091281	0	1	0	0.5
232	LG3(K7)	51.529	ATA-ccct190	0.05	4	0.748846	0.748846	0.74365	0.74365	0.000906613	0.7	1	0	0.5
233	LG3(K7)	52.529		0.02	19	0.742344	0.742344	0.747916	0.747916	0.000905619	0.8	0.909	0	0.455
234	LG3(K7)	53.529		0.28	8	0.736797	0.736797	0.751566	0.751566	0.000860824	5.7	0.901	0	0.451
235	LG3(K7)	54.529		0.5	5	0.735724	0.735724	0.752181	0.752181	0.000848389	7.1	0.977	0	0.488
236	LG3(K7)	54.717	GCA-cgca	0.54	4	0.735615	0.735615	0.75225	0.75225	0.000846995	7.2	1	0	0.5
237	LG3(K7)	55.679	LmSSR15-9D-490*	0.01	4	0.747364	0.747364	0.744864	0.744864	0.000911671	0.2	1	0	0.5
238	LG3(K7)	56.679		0	4	0.746687	0.746687	0.745133	0.745133	0.000912501	0.1	0.993	0	0.496
239	LG3(K7)	56.712	ATT-cgtt190	0	4	0.746667	0.746667	0.745143	0.745143	0.000912522	0.1	1	0	0.5
240	LG3(K7)	57.712		0	4	0.746667	0.746667	0.745143	0.745143	0.000912522	0.1	0.994	0	0.497
241	LG3(K7)	57.887	TAT-cctt-310	0	4	0.746667	0.746667	0.745143	0.745143	0.000912522	0.1	1	0	0.5
242	LG3(K7)	57.911	ATC-caac-260	0	4	0.746667	0.746667	0.745143	0.745143	0.000912522	0.1	1	0	0.5
243	LG3(K7)	57.911	TTA-cgtg-170	0	4	0.746667	0.746667	0.745143	0.745143	0.000912522	0.1	1	0	0.5
244	LG3(K7)	57.957	TAG-cgga-100	0	4	0.746657	0.746657	0.745135	0.745135	0.000912521	0.1	0.993	0	0.497
245	LG3(K7)	58.162	TAC-ccag-70	0	4	0.746615	0.746615	0.7451	0.7451	0.000912511	0.1	1	0	0.5
246	LG3(K7)	59.162		0.01	4	0.747298	0.747298	0.7447	0.7447	0.000911463	0.2	0.936	0	0.468
247	LG3(K7)	60.162		0.02	4	0.747997	0.747997	0.744327	0.744327	0.000909909	0.3	0.941	0	0.47
248	LG3(K7)	61.016	LmSSR18-10D	0.04	4	0.748583	0.748583	0.744048	0.744048	0.000908299	0.5	1	0	0.5
249	LG3(K7)	62.016		0.01	4	0.747204	0.747204	0.744834	0.744834	0.00091176	0.1	0.963	0	0.482
250	LG3(K7)	62.382	LmSSRS393D1-260*	0	4	0.746667	0.746667	0.745143	0.745143	0.000912522	0.1	1	0	0.5
251	LG3(K7)	62.382	LmSSRH1-2G	0	4	0.746667	0.746667	0.745143	0.745143	0.000912522	0.1	1	0	0.5
252	LG3(K7)	63.382		0	4	0.746631	0.746631	0.745114	0.745114	0.000912515	0.1	0.98	0	0.49
253	LG3(K7)	63.843	GGG-cgag-490	0	4	0.746615	0.746615	0.7451	0.7451	0.000912511	0.1	1	0	0.5
254	LG3(K7)	64.347	LmSSR12-6B*	0.04	4	0.748286	0.748286	0.743789	0.743789	0.000908122	0.5	1	0	0.5
255	LG3(K7)	65.347		0.07	4	0.749231	0.749231	0.743089	0.743089	0.000903843	1	0.974	0	0.487
256	LG3(K7)	65.491	LmSSR9-7B	0.08	4	0.749357	0.749357	0.743	0.743	0.000903188	1.1	1	0	0.5
257	LG3(K7)	66.343	GTG-caag-310	0	3	0.746364	0.746364	0.745364	0.745364	0.000912837	0	1	0	0.5
258	LG3(K7)	67.343		0	3	0.746092	0.746092	0.745472	0.745472	0.000912971	0	0.987	0	0.494
259	LG3(K7)	67.379	TCC-catc-200	0	3	0.746083	0.746083	0.745476	0.745476	0.000912974	0	1	0	0.5
260	LG3(K7)	68.379		0	4	0.746613	0.746613	0.745173	0.745173	0.00091258	0.1	0.915	0	0.457
261	LG3(K7)	69.379		0.01	4	0.747137	0.747137	0.744872	0.744872	0.000911872	0.1	0.92	0	0.46
262	LG3(K7)	70.257	ATT-cgtt310	0.02	4	0.747583	0.747583	0.744619	0.744619	0.000911026	0.2	1	0	0.5
263	LG3(K7)	71.257		0	3	0.74614	0.74614	0.745469	0.745469	0.000912959	0	0.992	0	0.496
264	LG3(K7)	71.515	LmSSR13-8B	0	3	0.745727	0.745727	0.745682	0.745682	0.000913059	0	1	0	0.5
265	LG3(K7)	72.125	AAT-ccgt290	0	3	0.745727	0.745727	0.745682	0.745682	0.000913059	0	1	0	0.5
266	LG3(K7)	73.042	GAA-ctaa-255	0.02	4	0.747615	0.747615	0.74445	0.74445	0.000910667	0.3	1	0	0.5
267	LG3(K7)	74.042		0.02	4	0.747615	0.747615	0.74445	0.74445	0.000910667	0.3	0.991	0	0.496
268	LG3(K7)	74.355	GTG-cttt	0.02	4	0.747615	0.747615	0.74445	0.74445	0.000910667	0.3	1	0	0.5
269	LG3(K7)	75.355		0.01	4	0.74706	0.74706	0.744885	0.744885	0.000911953	0.1	0.936	0	0.468
270	LG3(K7)	76.355		0	4	0.746399	0.746399	0.745315	0.745315	0.000912791	0	0.939	0	0.47
271	LG3(K7)	77.263	LmSSR15-10H*	0	3	0.745727	0.745727	0.745682	0.745682	0.000913059	0	1	0	0.5
272	LG3(K7)	78.263		0	3	0.74575	0.74575	0.745667	0.745667	0.000913058	0	0.999	0	0.499
273	LG3(K7)	78.268	ATT-caat-300	0	3	0.74575	0.74575	0.745667	0.745667	0.000913058	0	1	0	0.5
274	LG3(K7)	79.268		0	4	0.746581	0.746581	0.745211	0.745211	0.00091263	0	0.931	0	0.466
275	LG3(K7)	80.268		0.01	4	0.747466	0.747466	0.744765	0.744765	0.000911411	0.2	0.92	0	0.46
276	LG3(K7)	81.268		0.03	4	0.74833	0.74833	0.744363	0.744363	0.000909547	0.4	0.967	0	0.484
277	LG3(K7)	81.645	LmSSR2-12F180	0.03	4	0.748636	0.748636	0.744227	0.744227	0.00090874	0.5	1	0	0.5
278	LG3(K7)	82.645		0.01	5	0.747459	0.747459	0.744681	0.744681	0.000911269	0.2	0.849	0	0.424
279	LG3(K7)	83.645		0	4	0.746251	0.746251	0.745329	0.745329	0.000912856	0	0.87	0	0.435
280	LG3(K7)	84.395	LmSSRH17-1G	0	3	0.7455	0.7455	0.745842	0.745842	0.000913031	0	1	0	0.5
281	LG3(K7)	85.395		0	3	0.745848	0.745848	0.745587	0.745587	0.000913043	0	0.94	0	0.47
282	LG3(K7)	86.395		0	4	0.746225	0.746225	0.745317	0.745317	0.000912859	0	0.888	0	0.444
283	LG3(K7)	87.395		0	4	0.746629	0.746629	0.745036	0.745036	0.000912444	0.1	0.842	0	0.421
284	LG3(K7)	88.395		0.01	5	0.747055	0.747055	0.744745	0.744745	0.000911767	0.1	0.804	0	0.402
285	LG3(K7)	89.395		0.02	5	0.747501	0.747501	0.744449	0.744449	0.000910808	0.2	0.774	0	0.387
286	LG3(K7)	90.395		0.02	5	0.747961	0.747961	0.74415	0.74415	0.000909559	0.4	0.75	0	0.375
287	LG3(K7)	91.395		0.03	6	0.748428	0.748428	0.743855	0.743855	0.000908027	0.6	0.733	0	0.367
288	LG3(K7)	92.395		0.05	6	0.748899	0.748899	0.743566	0.743566	0.000906236	0.7	0.724	0	0.362
289	LG3(K7)	93.395		0.06	6	0.749365	0.749365	0.743288	0.743288	0.000904223	1	0.721	0	0.361
290	LG3(K7)	94.395		0.07	6	0.749822	0.749822	0.743025	0.743025	0.000902037	1.2	0.726	0	0.363
291	LG3(K7)	95.395		0.09	6	0.750265	0.750265	0.74278	0.74278	0.000899734	1.5	0.738	0	0.369
292	LG3(K7)	96.395		0.11	6	0.75069	0.75069	0.742555	0.742555	0.000897373	1.7	0.756	0	0.378
293	LG3(K7)	97.395		0.13	6	0.751093	0.751093	0.742353	0.742353	0.000895013	2	0.782	0	0.391
294	LG3(K7)	98.395		0.15	5	0.751473	0.751473	0.742174	0.742174	0.000892707	2.2	0.815	0	0.407
295	LG3(K7)	99.395		0.17	5	0.751829	0.751829	0.742018	0.742018	0.000890501	2.5	0.855	0	0.428
296	LG3(K7)	100.395		0.19	5	0.75216	0.75216	0.741886	0.741886	0.000888432	2.7	0.902	0	0.451
297	LG3(K7)	101.395		0.21	4	0.752466	0.752466	0.741777	0.741777	0.000886529	2.9	0.957	0	0.479
298	LG3(K7)	102.099	GTA-cact-50	0.22	4	0.752667	0.752667	0.741714	0.741714	0.000885302	3	1	0	0.5
299	LG3(K7)	103.099		0.19	5	0.752439	0.752439	0.741899	0.741899	0.000887458	2.8	0.966	0	0.483
300	LG3(K7)	104.099		0.15	6	0.752136	0.752136	0.742122	0.742122	0.000890042	2.5	0.938	0	0.469
301	LG3(K7)	105.099		0.11	7	0.751717	0.751717	0.742402	0.742402	0.000893227	2.2	0.915	0	0.458
302	LG3(K7)	106.099		0.07	9	0.751098	0.751098	0.742781	0.742781	0.00089731	1.7	0.898	0	0.449
303	LG3(K7)	107.099		0.03	11	0.750069	0.750069	0.743361	0.743361	0.000902847	1.1	0.887	0	0.443
304	LG3(K7)	108.099		0.01	16	0.747901	0.747901	0.744521	0.744521	0.000910469	0.3	0.881	0	0.441
305	LG3(K7)	109.099		0	16	0.743678	0.743678	0.746791	0.746791	0.00091085	0.2	0.881	0	0.44
306	LG3(K7)	110.099		0.03	11	0.741455	0.741455	0.747991	0.747991	0.000903329	1.1	0.886	0	0.443
307	LG3(K7)	111.099		0.07	9	0.740301	0.740301	0.74858	0.74858	0.000897502	1.7	0.898	0	0.449
308	LG3(K7)	112.099		0.11	7	0.739534	0.739534	0.748941	0.748941	0.000893068	2.2	0.914	0	0.457
309	LG3(K7)	113.099		0.15	6	0.738958	0.738958	0.749187	0.749187	0.000889545	2.6	0.937	0	0.468
310	LG3(K7)	114.099		0.19	5	0.738495	0.738495	0.749364	0.749364	0.000886651	2.9	0.965	0	0.482
311	LG3(K7)	115.099		0.23	4	0.738104	0.738104	0.749496	0.749496	0.000884216	3.2	0.999	0	0.499
312	LG3(K7)	115.136	GGG-cgag-520	0.23	4	0.738091	0.738091	0.7495	0.7495	0.000884134	3.2	1	0	0.5
313	LG3(K7)	116.136		0.21	4	0.738483	0.738483	0.749409	0.749409	0.000886281	2.9	0.962	0	0.481
314	LG3(K7)	117.136		0.19	5	0.738883	0.738883	0.749306	0.749306	0.000888468	2.7	0.927	0	0.463
315	LG3(K7)	118.136		0.17	5	0.739291	0.739291	0.749191	0.749191	0.000890675	2.5	0.895	0	0.447
316	LG3(K7)	119.136		0.15	5	0.739704	0.739704	0.749064	0.749064	0.000892882	2.2	0.865	0	0.433
317	LG3(K7)	120.136		0.13	5	0.740122	0.740122	0.748924	0.748924	0.000895068	2	0.838	0	0.419
318	LG3(K7)	121.136		0.11	5	0.740543	0.740543	0.748772	0.748772	0.00089721	1.7	0.814	0	0.407
319	LG3(K7)	122.136		0.1	6	0.740965	0.740965	0.748607	0.748607	0.000899287	1.5	0.793	0	0.396
320	LG3(K7)	123.136		0.08	6	0.741386	0.741386	0.74843	0.74843	0.000901279	1.3	0.774	0	0.387
321	LG3(K7)	124.136		0.07	6	0.741807	0.741807	0.74824	0.74824	0.000903165	1.1	0.758	0	0.379
322	LG3(K7)	125.136		0.05	6	0.742224	0.742224	0.748038	0.748038	0.000904927	0.9	0.744	0	0.372
323	LG3(K7)	126.136		0.04	6	0.742636	0.742636	0.747825	0.747825	0.000906548	0.7	0.733	0	0.366
324	LG3(K7)	127.136		0.03	6	0.743044	0.743044	0.747599	0.747599	0.000908012	0.6	0.724	0	0.362
325	LG3(K7)	128.136		0.02	6	0.743444	0.743444	0.747363	0.747363	0.000909306	0.4	0.718	0	0.359
326	LG3(K7)	129.136		0.02	6	0.743836	0.743836	0.747115	0.747115	0.00091042	0.3	0.714	0	0.357
327	LG3(K7)	130.136		0.01	5	0.744219	0.744219	0.746858	0.746858	0.000911344	0.2	0.713	0	0.357
328	LG3(K7)	131.136		0.01	5	0.744592	0.744592	0.746592	0.746592	0.000912071	0.1	0.714	0	0.357
329	LG3(K7)	132.136		0	5	0.744954	0.744954	0.746317	0.746317	0.000912599	0.1	0.718	0	0.359
330	LG3(K7)	133.136		0	5	0.745304	0.745304	0.746035	0.746035	0.000912927	0	0.724	0	0.362
331	LG3(K7)	134.136		0	4	0.745642	0.745642	0.745746	0.745746	0.000913057	0	0.733	0	0.366
332	LG3(K7)	135.136		0	4	0.745965	0.745965	0.745452	0.745452	0.000912994	0	0.744	0	0.372
333	LG3(K7)	136.136		0	5	0.746274	0.746274	0.745155	0.745155	0.000912747	0	0.758	0	0.379
334	LG3(K7)	137.136		0	5	0.746568	0.746568	0.744855	0.744855	0.000912326	0.1	0.774	0	0.387
335	LG3(K7)	138.136		0.01	5	0.746846	0.746846	0.744555	0.744555	0.000911748	0.1	0.793	0	0.397
336	LG3(K7)	139.136		0.01	5	0.747107	0.747107	0.744256	0.744256	0.000911029	0.2	0.815	0	0.407
337	LG3(K7)	140.136		0.02	5	0.74735	0.74735	0.74396	0.74396	0.00091019	0.3	0.839	0	0.419
338	LG3(K7)	141.136		0.03	5	0.747574	0.747574	0.74367	0.74367	0.000909254	0.4	0.865	0	0.433
339	LG3(K7)	142.136		0.03	5	0.74778	0.74778	0.743386	0.743386	0.000908247	0.5	0.895	0	0.448
340	LG3(K7)	143.136		0.04	5	0.747966	0.747966	0.743112	0.743112	0.000907194	0.6	0.927	0	0.464
341	LG3(K7)	144.136		0.05	4	0.748133	0.748133	0.742848	0.742848	0.000906121	0.8	0.962	0	0.481
342	LG3(K7)	145.125	TTA-ccga-190	0.06	4	0.748278	0.748278	0.7426	0.7426	0.000905067	0.9	1	0	0.5
343	LG4(K7)	0	GTG-cgct-160	0.22	4	0.740647	0.740647	0.751062	0.751062	0.000885964	3	1	0	0.5
344	LG4(K7)	1		0.13	4	0.741945	0.741945	0.750226	0.750226	0.000896067	1.9	0.931	0	0.466
345	LG4(K7)	1.775	GTT-ccat-150	0.08	4	0.743	0.743	0.749357	0.749357	0.000903188	1.1	1	0	0.5
346	LG4(K7)	2.775		0.03	7	0.743792	0.743792	0.748248	0.748248	0.0009082	0.5	0.955	0	0.477
347	LG4(K7)	3.775		0	13	0.746395	0.746395	0.744801	0.744801	0.000912434	0.1	0.931	0	0.466
348	LG4(K7)	4.775		0.07	10	0.749508	0.749508	0.741037	0.741037	0.000895302	1.9	0.93	0	0.465
349	LG4(K7)	5.775		0.16	6	0.750356	0.750356	0.740071	0.740071	0.000886846	2.9	0.95	0	0.475
350	LG4(K7)	6.775		0.24	4	0.750741	0.750741	0.739641	0.739641	0.00088251	3.3	0.993	0	0.496
351	LG4(K7)	6.91	TAA-ccta-360	0.25	4	0.750778	0.750778	0.7396	0.7396	0.000882082	3.4	1	0	0.5
352	LG4(K7)	7.91		0.25	4	0.750778	0.750778	0.739599	0.739599	0.000882076	3.4	0.977	0	0.489
353	LG4(K7)	8.91		0.25	4	0.750778	0.750778	0.7396	0.7396	0.000882078	3.4	0.985	0	0.492
354	LG4(K7)	9.422	TAG-ctgg-185	0.25	4	0.750778	0.750778	0.7396	0.7396	0.000882082	3.4	1	0	0.5
355	LG4(K7)	10.284	TGA-cgga-120	0.25	4	0.750778	0.750778	0.7396	0.7396	0.000882082	3.4	1	0	0.5
356	LG4(K7)	11.284		0.25	4	0.750778	0.750778	0.7396	0.7396	0.000882077	3.4	0.965	0	0.482
357	LG4(K7)	12.284		0.25	4	0.750778	0.750778	0.7396	0.7396	0.000882081	3.4	0.989	0	0.494
358	LG4(K7)	12.476	GTT-ccat-220	0.25	4	0.750778	0.750778	0.7396	0.7396	0.000882082	3.4	1	0	0.5
359	LG4(K7)	13.476		0.25	4	0.750727	0.750727	0.739473	0.739473	0.000881752	3.4	0.904	0	0.452
360	LG4(K7)	14.476		0.25	4	0.750677	0.750677	0.739344	0.739344	0.000881417	3.5	0.871	0	0.435
361	LG4(K7)	15.476		0.26	4	0.750629	0.750629	0.739212	0.739212	0.000881077	3.5	0.9	0	0.45
362	LG4(K7)	16.476		0.26	4	0.750581	0.750581	0.739079	0.739079	0.000880733	3.5	0.993	0	0.497
363	LG4(K7)	16.53	LmSSR11-3E-210*	0.26	4	0.750579	0.750579	0.739071	0.739071	0.000880714	3.5	1	0	0.5
364	LG4(K7)	17.53		0.25	4	0.75068	0.75068	0.739355	0.739355	0.000881458	3.5	0.965	0	0.482
365	LG4(K7)	18.429	ATA-cctt90	0.25	4	0.750778	0.750778	0.7396	0.7396	0.000882082	3.4	1	0	0.5
366	LG4(K7)	18.429	TAT-cgtt	0.25	4	0.750778	0.750778	0.7396	0.7396	0.000882082	3.4	1	0	0.5
367	LG4(K7)	18.51	ATC-cggt290	0.25	4	0.750778	0.750778	0.7396	0.7396	0.000882082	3.4	1	0	0.5
368	LG4(K7)	18.557	CaiSSRB08G02-140	0.13	4	0.749647	0.749647	0.7415	0.7415	0.000896481	1.8	1	0	0.5
369	LG4(K7)	19.506	TTC-ctcc	0.25	4	0.750778	0.750778	0.7396	0.7396	0.000882082	3.4	1	0	0.5
370	LG4(K7)	19.506	LmSSR2-7H	0.25	4	0.750778	0.750778	0.7396	0.7396	0.000882082	3.4	1	0	0.5
371	LG4(K7)	19.833	ATA-ctaa-170	0.25	4	0.750778	0.750778	0.7396	0.7396	0.000882082	3.4	1	0	0.5
372	LG4(K7)	19.834	CaiSSRA01D16	0.25	4	0.750778	0.750778	0.7396	0.7396	0.000882082	3.4	1	0	0.5
373	LG4(K7)	20.295	GAC-cgtt-140	0.25	4	0.750778	0.750778	0.7396	0.7396	0.000882082	3.4	1	0	0.5
374	LG4(K7)	20.548	LmSSRS393D1-180*	0.25	4	0.750778	0.750778	0.7396	0.7396	0.000882082	3.4	1	0	0.5
375	LG4(K7)	20.548	TCA-cata	0.25	4	0.750778	0.750778	0.7396	0.7396	0.000882082	3.4	1	0	0.5
376	LG4(K7)	20.548	GAA-cgtg-220	0.25	4	0.750778	0.750778	0.7396	0.7396	0.000882082	3.4	1	0	0.5
377	LG4(K7)	20.548	LmSSR16-12B	0.25	4	0.750778	0.750778	0.7396	0.7396	0.000882082	3.4	1	0	0.5
378	LG4(K7)	20.688	TAG-cctg-120	0.25	4	0.750778	0.750778	0.7396	0.7396	0.000882082	3.4	1	0	0.5
379	LG4(K7)	20.846	ATC-ccat150	0.25	4	0.750778	0.750778	0.7396	0.7396	0.000882082	3.4	1	0	0.5
380	LG4(K7)	21.281	GTC-cgct-380	0.15	4	0.749941	0.749941	0.741187	0.741187	0.000893921	2.1	1	0	0.5
381	LG4(K7)	21.645	TTT-ctct	0.13	4	0.749647	0.749647	0.7415	0.7415	0.000896481	1.8	1	0	0.5
382	LG4(K7)	21.84	ATA-cctt120	0.13	4	0.749647	0.749647	0.7415	0.7415	0.000896481	1.8	1	0	0.5
383	LG4(K7)	22.59	ATA-caaa-210	0.07	4	0.74875	0.74875	0.742824	0.742824	0.000904287	1	1	0	0.5
384	LG4(K7)	22.792	AAC-cacc-250	0.06	4	0.7485	0.7485	0.743059	0.743059	0.000905665	0.8	1	0	0.5
385	LG4(K7)	23.324	ATC-cggt190	0.25	4	0.750778	0.750778	0.7396	0.7396	0.000882082	3.4	1	0	0.5
386	LG4(K7)	24.324		0.25	4	0.750778	0.750778	0.7396	0.7396	0.000882078	3.4	0.93	0	0.465
387	LG4(K7)	25.253	AAC-ccgt200	0.25	4	0.750778	0.750778	0.7396	0.7396	0.000882082	3.4	1	0	0.5
388	LG4(K7)	25.253	AAC-ccgt100	0.25	4	0.750778	0.750778	0.7396	0.7396	0.000882082	3.4	1	0	0.5
389	LG4(K7)	26.253		0.25	4	0.750735	0.750735	0.739491	0.739491	0.000881796	3.4	0.952	0	0.476
390	LG4(K7)	27.253		0.25	4	0.750692	0.750692	0.739381	0.739381	0.000881509	3.5	0.93	0	0.465
391	LG4(K7)	28.253		0.25	4	0.750651	0.750651	0.739269	0.739269	0.000881219	3.5	0.933	0	0.467
392	LG4(K7)	29.253		0.26	4	0.750609	0.750609	0.739156	0.739156	0.000880929	3.5	0.962	0	0.481
393	LG4(K7)	29.995	GTT-caat-140	0.26	4	0.750579	0.750579	0.739071	0.739071	0.000880714	3.5	1	0	0.5
394	LG4(K7)	30.995		0.18	5	0.749735	0.749735	0.739902	0.739902	0.00088966	2.6	0.942	0	0.471
395	LG4(K7)	31.868	GGT-cgat	0.11	4	0.74875	0.74875	0.741	0.741	0.00089872	1.6	1	0	0.5
396	LG4(K7)	32.868		0.07	8	0.748836	0.748836	0.740978	0.740978	0.000898247	1.6	0.889	0	0.445
397	LG4(K7)	33.868		0.01	17	0.747497	0.747497	0.74299	0.74299	0.000908185	0.5	0.86	0	0.43
398	LG4(K7)	34.868		0.01	8	0.744335	0.744335	0.747812	0.747812	0.000910179	0.3	0.912	0	0.456
399	LG4(K7)	35.59	TTG-cgta-220	0.04	4	0.74395	0.74395	0.748385	0.748385	0.000908364	0.5	1	0	0.5
400	LG5(K7)	0	CaiSSRb120-240	0.01	4	0.746941	0.746941	0.744375	0.744375	0.000911415	0.2	1	0	0.5
401	LG5(K7)	0	CaiSSRb120-260	0.01	4	0.746941	0.746941	0.744375	0.744375	0.000911415	0.2	1	0	0.5
402	LG5(K7)	1		0.01	4	0.746983	0.746983	0.744328	0.744328	0.000911299	0.2	0.973	0	0.486
403	LG5(K7)	2		0.01	4	0.747021	0.747021	0.744287	0.744287	0.000911192	0.2	0.956	0	0.478
404	LG5(K7)	3		0.02	4	0.747053	0.747053	0.744251	0.744251	0.000911099	0.2	0.95	0	0.475
405	LG5(K7)	4		0.02	4	0.74708	0.74708	0.744223	0.744223	0.000911021	0.2	0.955	0	0.477
406	LG5(K7)	5		0.02	4	0.747101	0.747101	0.744202	0.744202	0.000910961	0.2	0.97	0	0.485
407	LG5(K7)	6		0.02	4	0.747116	0.747116	0.744189	0.744189	0.000910919	0.2	0.996	0	0.498
408	LG5(K7)	6.123	AAT-cgct165	0.02	4	0.747118	0.747118	0.744188	0.744188	0.000910915	0.2	1	0	0.5
409	LG5(K7)	7.123		0.02	4	0.747129	0.747129	0.744277	0.744277	0.000911027	0.2	0.941	0	0.47
410	LG5(K7)	8.123		0.01	4	0.74711	0.74711	0.74439	0.74439	0.000911212	0.2	0.91	0	0.455
411	LG5(K7)	9.123		0.01	4	0.747061	0.747061	0.74452	0.74452	0.000911455	0.2	0.907	0	0.453
412	LG5(K7)	10.123		0.01	4	0.746983	0.746983	0.744663	0.744663	0.000911729	0.1	0.931	0	0.466
413	LG5(K7)	11.123		0.01	4	0.746882	0.746882	0.74481	0.74481	0.000912008	0.1	0.984	0	0.492
414	LG5(K7)	11.346	ATA-ccct140	0.01	4	0.746857	0.746857	0.744842	0.744842	0.000912068	0.1	1	0	0.5
415	LG5(K7)	12.346		0	4	0.746446	0.746446	0.745081	0.745081	0.000912598	0.1	0.976	0	0.488
416	LG5(K7)	13.346		0	3	0.746021	0.746021	0.745399	0.745399	0.000912963	0	0.992	0	0.496
417	LG5(K7)	13.56	LmSSR10-10D130	0	3	0.745938	0.745938	0.745471	0.745471	0.000913005	0	1	0	0.5
418	LG5(K7)	14.56		0.01	4	0.746566	0.746566	0.744879	0.744879	0.000912349	0.1	0.969	0	0.485
419	LG5(K7)	15.56		0.02	4	0.747212	0.747212	0.744273	0.744273	0.000910903	0.2	0.953	0	0.477
420	LG5(K7)	16.56		0.03	4	0.747845	0.747845	0.743678	0.743678	0.000908723	0.5	0.952	0	0.476
421	LG5(K7)	17.56		0.05	4	0.74844	0.74844	0.743118	0.743118	0.000905985	0.8	0.966	0	0.483
422	LG5(K7)	18.56		0.08	4	0.748979	0.748979	0.742609	0.742609	0.000902923	1.1	0.994	0	0.497
423	LG5(K7)	18.726	TCT-catt-230	0.08	4	0.749062	0.749062	0.742529	0.742529	0.000902399	1.2	1	0	0.5
424	LG5(K7)	19.726		0.11	4	0.749341	0.749341	0.741675	0.741675	0.000898403	1.6	0.889	0	0.444
425	LG5(K7)	20.375	TGA-cgga-220	0.13	4	0.749389	0.749389	0.741267	0.741267	0.000896703	1.8	1	0	0.5
426	LG5(K7)	21.375		0.12	4	0.749322	0.749322	0.741517	0.741517	0.00089791	1.7	0.909	0	0.454
427	LG5(K7)	22.375		0.1	4	0.749144	0.749144	0.741946	0.741946	0.00090013	1.4	0.953	0	0.476
428	LG5(K7)	22.725	TAA-ccat-120	0.09	4	0.749059	0.749059	0.742125	0.742125	0.000901051	1.3	1	0	0.5
429	LG5(K7)	23.725		0	13	0.7469	0.7469	0.744215	0.744215	0.000911277	0.2	0.955	0	0.478
430	LG5(K7)	24.725		0.07	6	0.742905	0.742905	0.749805	0.749805	0.000901591	1.3	0.972	0	0.486
431	LG5(K7)	25.046	TAC-cctc-170	0.1	4	0.7428	0.7428	0.750154	0.750154	0.000900148	1.4	0.99	0	0.495
432	LG5(K7)	26.002	GAA-cgtg-150	0.22	4	0.750158	0.750158	0.739643	0.739643	0.000886053	3	1	0	0.5
433	LG5(K7)	26.002	CaiSSRB03C04-180	0.22	4	0.750158	0.750158	0.739643	0.739643	0.000886053	3	1	0	0.5
434	LG5(K7)	26.002	GTA-cggt-220	0.22	4	0.750158	0.750158	0.739643	0.739643	0.000886053	3	1	0	0.5
435	LG5(K7)	26.002	LmSSR16-4F-230	0.22	4	0.750158	0.750158	0.739643	0.739643	0.000886053	3	1	0	0.5
436	LG5(K7)	26.002	CaiSSRB03C04-175	0.22	4	0.750158	0.750158	0.739643	0.739643	0.000886053	3	1	0	0.5
437	LG5(K7)	27.002		0.29	4	0.750605	0.750605	0.738319	0.738319	0.000876846	4	0.992	0	0.496
438	LG5(K7)	27.284	ATC-caac-100	0.31	4	0.7507	0.7507	0.738	0.738	0.000874552	4.2	1	0	0.5
439	LG5(K7)	28.284		0.31	4	0.7507	0.7507	0.738	0.738	0.00087455	4.2	0.994	0	0.497
440	LG5(K7)	28.482	LmSSRS143D2*	0.31	4	0.7507	0.7507	0.738	0.738	0.000874552	4.2	1	0	0.5
441	LG5(K7)	28.482	LmSSR2-12F-450	0.31	4	0.7507	0.7507	0.738	0.738	0.000874552	4.2	1	0	0.5
442	LG5(K7)	28.482	TAG-ctgg-180	0.31	4	0.7507	0.7507	0.738	0.738	0.000874552	4.2	1	0	0.5
443	LG5(K7)	29.088	AAT-ccgt350	0.31	4	0.7507	0.7507	0.738	0.738	0.000874552	4.2	1	0	0.5
444	LG5(K7)	30.077	AAC-ccgt450	0.5	4	0.751619	0.751619	0.735333	0.735333	0.000851685	6.7	1	0	0.5
445	LG5(K7)	31.077		0.4	5	0.751388	0.751388	0.736761	0.736761	0.000862206	5.6	0.942	0	0.471
446	LG5(K7)	32.077		0.3	4	0.750946	0.750946	0.738481	0.738481	0.000875185	4.1	0.99	0	0.495
447	LG5(K7)	32.166	TGA-cgga-260	0.29	4	0.750895	0.750895	0.738643	0.738643	0.000876394	4	1	0	0.5
448	LG5(K7)	32.742	TCT-cgtt-180	0.31	4	0.7507	0.7507	0.738	0.738	0.000874552	4.2	1	0	0.5
449	LG5(K7)	33.742		0.31	4	0.750601	0.750601	0.737724	0.737724	0.000873959	4.3	0.977	0	0.488
450	LG5(K7)	34.742		0.32	4	0.750507	0.750507	0.737435	0.737435	0.000873317	4.4	0.988	0	0.494
451	LG5(K7)	35.084	LmSSR2-12F-600	0.32	4	0.750476	0.750476	0.737333	0.737333	0.000873088	4.4	1	0	0.5
452	LG5(K7)	35.084	LmSSR7-10D	0.32	4	0.750476	0.750476	0.737333	0.737333	0.000873088	4.4	1	0	0.5
453	LG5(K7)	36.084		0.37	5	0.751306	0.751306	0.737154	0.737154	0.00086514	5.2	0.895	0	0.448
454	LG5(K7)	37.084		0.43	5	0.752083	0.752083	0.737131	0.737131	0.000858359	6	0.859	0	0.43
455	LG5(K7)	38.084		0.48	5	0.752808	0.752808	0.737216	0.737216	0.000852751	6.6	0.891	0	0.446
456	LG5(K7)	39.084		0.53	4	0.753492	0.753492	0.737365	0.737365	0.000848114	7.1	0.992	0	0.496
457	LG5(K7)	39.14	GTG-cgct-240	0.53	4	0.753529	0.753529	0.737375	0.737375	0.000847878	7.1	1	0	0.5
458	LG5(K7)	40.14		0.51	5	0.753382	0.753382	0.737145	0.737145	0.000847344	7.2	0.893	0	0.447
459	LG5(K7)	41.14		0.48	5	0.753097	0.753097	0.737122	0.737122	0.000849607	6.9	0.842	0	0.421
460	LG5(K7)	42.14		0.44	5	0.752664	0.752664	0.737314	0.737314	0.00085465	6.4	0.847	0	0.423
461	LG5(K7)	43.14		0.4	5	0.75208	0.75208	0.737719	0.737719	0.000862134	5.6	0.907	0	0.454
462	LG5(K7)	43.883	TTC-ccgc	0.36	4	0.75156	0.75156	0.738147	0.738147	0.000868797	4.8	0.989	0	0.494
463	LG5(K7)	44.883		0.33	5	0.751196	0.751196	0.738068	0.738068	0.000871105	4.6	0.903	0	0.451
464	LG5(K7)	45.883		0.29	5	0.750758	0.750758	0.738271	0.738271	0.000875477	4.1	0.891	0	0.445
465	LG5(K7)	46.883		0.25	5	0.750234	0.750234	0.738789	0.738789	0.000881719	3.4	0.954	0	0.477
466	LG5(K7)	47.286	TCC-cgtc-490	0.23	4	0.75	0.75	0.739077	0.739077	0.000884573	3.1	1	0	0.5
467	LG5(K7)	48.286		0.23	4	0.750071	0.750071	0.738902	0.738902	0.000883337	3.3	0.958	0	0.479
468	LG5(K7)	49.286		0.24	5	0.750134	0.750134	0.738738	0.738738	0.000882184	3.4	0.924	0	0.462
469	LG5(K7)	50.286		0.25	5	0.750187	0.750187	0.738586	0.738586	0.000881129	3.5	0.897	0	0.448
470	LG5(K7)	51.286		0.25	5	0.750232	0.750232	0.738448	0.738448	0.000880185	3.6	0.876	0	0.438
471	LG5(K7)	52.286		0.26	5	0.750266	0.750266	0.738323	0.738323	0.000879364	3.7	0.863	0	0.431
472	LG5(K7)	53.286		0.26	5	0.750291	0.750291	0.738212	0.738212	0.000878673	3.8	0.856	0	0.428
473	LG5(K7)	54.286		0.27	5	0.750306	0.750306	0.738116	0.738116	0.00087812	3.8	0.857	0	0.428
474	LG5(K7)	55.286		0.27	5	0.75031	0.75031	0.738034	0.738034	0.000877709	3.9	0.864	0	0.432
475	LG5(K7)	56.286		0.27	5	0.750304	0.750304	0.737966	0.737966	0.000877442	3.9	0.878	0	0.439
476	LG5(K7)	57.286		0.28	5	0.750288	0.750288	0.737912	0.737912	0.00087732	3.9	0.9	0	0.45
477	LG5(K7)	58.286		0.28	5	0.750261	0.750261	0.737872	0.737872	0.000877342	3.9	0.928	0	0.464
478	LG5(K7)	59.286		0.28	4	0.750225	0.750225	0.737845	0.737845	0.000877505	3.9	0.963	0	0.482
479	LG5(K7)	60.057	GAC-cagt-230	0.28	4	0.75019	0.75019	0.737833	0.737833	0.000877724	3.9	0.995	0	0.498
480	LG6(K7)	0	ATC-ctac-250	0.07	4	0.742694	0.742694	0.748824	0.748824	0.000903668	1	0.994	0	0.497
481	LG6(K7)	1		0.07	4	0.742695	0.742695	0.748833	0.748833	0.000903646	1	0.955	0	0.478
482	LG6(K7)	2		0.07	4	0.742702	0.742702	0.748837	0.748837	0.000903657	1	0.921	0	0.46
483	LG6(K7)	3		0.07	5	0.742716	0.742716	0.748836	0.748836	0.000903702	1	0.891	0	0.446
484	LG6(K7)	4		0.07	5	0.742735	0.742735	0.74883	0.74883	0.000903781	1	0.866	0	0.433
485	LG6(K7)	5		0.07	5	0.742761	0.742761	0.748819	0.748819	0.000903895	1	0.845	0	0.423
486	LG6(K7)	6		0.07	5	0.742793	0.742793	0.748803	0.748803	0.000904041	1	0.829	0	0.414
487	LG6(K7)	7		0.06	5	0.742831	0.742831	0.748782	0.748782	0.00090422	1	0.817	0	0.408
488	LG6(K7)	8		0.06	5	0.742875	0.742875	0.748755	0.748755	0.000904429	0.9	0.809	0	0.404
489	LG6(K7)	9		0.06	5	0.742924	0.742924	0.748724	0.748724	0.000904667	0.9	0.805	0	0.403
490	LG6(K7)	10		0.06	5	0.742979	0.742979	0.748688	0.748688	0.000904931	0.9	0.806	0	0.403
491	LG6(K7)	11		0.06	5	0.743038	0.743038	0.748647	0.748647	0.000905217	0.9	0.811	0	0.406
492	LG6(K7)	12		0.05	5	0.743102	0.743102	0.748602	0.748602	0.000905523	0.8	0.821	0	0.41
493	LG6(K7)	13		0.05	5	0.74317	0.74317	0.748552	0.748552	0.000905845	0.8	0.835	0	0.417
494	LG6(K7)	14		0.05	5	0.743241	0.743241	0.748498	0.748498	0.00090618	0.8	0.853	0	0.427
495	LG6(K7)	15		0.05	5	0.743316	0.743316	0.748441	0.748441	0.000906525	0.7	0.876	0	0.438
496	LG6(K7)	16		0.05	4	0.743392	0.743392	0.748381	0.748381	0.000906875	0.7	0.903	0	0.451
497	LG6(K7)	17		0.04	4	0.743471	0.743471	0.748317	0.748317	0.000907227	0.6	0.934	0	0.467
498	LG6(K7)	18		0.04	4	0.743551	0.743551	0.748251	0.748251	0.000907579	0.6	0.97	0	0.485
499	LG6(K7)	18.747	GTT-cgag-410	0.04	4	0.743611	0.743611	0.7482	0.7482	0.000907839	0.6	1	0	0.5
500	LG6(K7)	19.747		0.01	4	0.744873	0.744873	0.746834	0.746834	0.000912123	0.1	0.9	0	0.45
501	LG6(K7)	20.747		0	4	0.746061	0.746061	0.745113	0.745113	0.000912847	0	0.926	0	0.463
502	LG6(K7)	21.336	ATC-ccat100	0.01	4	0.746667	0.746667	0.744	0.744	0.000911414	0.2	1	0	0.5
503	LG6(K7)	22.336		0.52	7	0.753393	0.753393	0.734503	0.734503	0.000826909	9.4	0.909	0	0.455
504	LG6(K7)	23.043	LmSSR2-5G-280	0.65	4	0.753316	0.753316	0.735357	0.735357	0.000834282	8.6	1	0	0.5
505	LG6(K7)	24.043		0.58	5	0.752958	0.752958	0.735709	0.735709	0.000840541	7.9	0.932	0	0.466
506	LG6(K7)	25.043		0.51	5	0.752515	0.752515	0.736356	0.736356	0.000849369	7	0.956	0	0.478
507	LG6(K7)	25.519	LmSSR1-9G-170	0.47	4	0.752263	0.752263	0.736786	0.736786	0.000854547	6.4	1	0	0.5
508	LG6(K7)	26.197	ATA-cgaa140	0.43	4	0.752389	0.752389	0.737667	0.737667	0.000859322	5.9	1	0	0.5
509	LG6(K7)	26.197	GAC-ctac-450	0.43	4	0.752389	0.752389	0.737667	0.737667	0.000859322	5.9	1	0	0.5
510	LG6(K7)	27.036	TAT-cctt-140	0.65	4	0.753316	0.753316	0.735357	0.735357	0.000834282	8.6	1	0	0.5
511	LG6(K7)	27.104	LmSSR7-6H-160*	0.65	4	0.753316	0.753316	0.735357	0.735357	0.000834282	8.6	1	0	0.5
512	LG6(K7)	27.104	GTT-ctcg-170	0.65	4	0.753316	0.753316	0.735357	0.735357	0.000834282	8.6	1	0	0.5
513	LG6(K7)	27.104	ATT-ccat110	0.65	4	0.753316	0.753316	0.735357	0.735357	0.000834282	8.6	1	0	0.5
514	LG6(K7)	27.195	LmSSR11-4H-200*	0.65	4	0.753316	0.753316	0.735357	0.735357	0.000834282	8.6	1	0	0.5
515	LG6(K7)	28.195		0.57	5	0.753094	0.753094	0.736058	0.736058	0.000841763	7.8	0.965	0	0.483
516	LG6(K7)	29.195		0.49	5	0.752755	0.752755	0.737022	0.737022	0.000851832	6.7	0.983	0	0.491
517	LG6(K7)	29.524	CaiSSRB04O03-290	0.46	4	0.752611	0.752611	0.7374	0.7374	0.000855693	6.3	1	0	0.5
518	LG6(K7)	29.524	ATG-caag-170	0.46	4	0.752611	0.752611	0.7374	0.7374	0.000855693	6.3	1	0	0.5
519	LG6(K7)	30.524		0.46	4	0.752611	0.752611	0.7374	0.7374	0.000855693	6.3	0.998	0	0.499
520	LG6(K7)	30.575	AAC-cacc-550	0.46	4	0.752611	0.752611	0.7374	0.7374	0.000855693	6.3	1	0	0.5
521	LG6(K7)	31.575		0.46	4	0.752611	0.752611	0.7374	0.7374	0.00085569	6.3	0.955	0	0.478
522	LG6(K7)	32.218	CaiSSRB04O03-300	0.46	4	0.752611	0.752611	0.7374	0.7374	0.000855693	6.3	1	0	0.5
523	LG6(K7)	33.218		0.35	5	0.752132	0.752132	0.7389	0.7389	0.000869317	4.8	0.92	0	0.46
524	LG6(K7)	33.94	ATG-caag-165	0.26	4	0.751625	0.751625	0.740118	0.740118	0.000879985	3.6	1	0	0.5
525	LG6(K7)	34.94		0.42	5	0.752176	0.752176	0.737553	0.737553	0.000860297	5.8	0.932	0	0.466
526	LG6(K7)	35.252	CaiSSRB08C21-150	0.47	4	0.752263	0.752263	0.736786	0.736786	0.000854547	6.4	1	0	0.5
527	LG6(K7)	36.252		0.47	4	0.752264	0.752264	0.736785	0.736785	0.000854539	6.4	0.954	0	0.477
528	LG6(K7)	37.252		0.47	4	0.752263	0.752263	0.736786	0.736786	0.000854543	6.4	0.978	0	0.489
529	LG6(K7)	37.556	TCG-cgtg-210	0.47	4	0.752263	0.752263	0.736786	0.736786	0.000854547	6.4	1	0	0.5
530	LG6(K7)	38.556		0.47	4	0.752264	0.752264	0.736785	0.736785	0.000854531	6.4	0.946	0	0.473
531	LG6(K7)	39.556		0.47	4	0.752265	0.752265	0.736785	0.736785	0.000854526	6.4	0.929	0	0.464
532	LG6(K7)	40.556		0.47	4	0.752264	0.752264	0.736785	0.736785	0.000854533	6.4	0.947	0	0.473
533	LG6(K7)	41.545	ATC-ctac-600	0.47	4	0.752263	0.752263	0.736786	0.736786	0.000854551	6.4	1	0	0.5
534	LG6(K7)	42.545		0.47	4	0.752263	0.752263	0.736786	0.736786	0.000854546	6.4	0.994	0	0.497
535	LG6(K7)	42.734	ATA-ctaa-220	0.47	4	0.752263	0.752263	0.736786	0.736786	0.000854547	6.4	1	0	0.5
536	LG6(K7)	43.734		0.4	5	0.752004	0.752004	0.737126	0.737126	0.000859005	5.9	0.961	0	0.48
537	LG6(K7)	44.734		0.31	6	0.751675	0.751675	0.737555	0.737555	0.000864387	5.3	0.931	0	0.465
538	LG6(K7)	45.734		0.23	7	0.751233	0.751233	0.738131	0.738131	0.000871177	4.6	0.911	0	0.456
539	LG6(K7)	46.734		0.14	9	0.750566	0.750566	0.738999	0.738999	0.000880447	3.6	0.901	0	0.45
540	LG6(K7)	47.734		0.05	14	0.749278	0.749278	0.740693	0.740693	0.000895138	2	0.901	0	0.45
541	LG6(K7)	48.734		0	10	0.745918	0.745918	0.745373	0.745373	0.000912988	0	0.91	0	0.455
542	LG6(K7)	49.734		0.02	8	0.743991	0.743991	0.748274	0.748274	0.000908664	0.5	0.929	0	0.464
543	LG6(K7)	50.734		0.06	6	0.743153	0.743153	0.749585	0.749585	0.000903168	1.1	0.957	0	0.479
544	LG6(K7)	51.734		0.11	4	0.742638	0.742638	0.750401	0.750401	0.000898671	1.6	0.996	0	0.498
545	LG6(K7)	51.825	TAT-ccaa-180	0.12	4	0.7426	0.7426	0.750462	0.750462	0.000898304	1.6	1	0	0.5
546	LG6(K7)	52.825		0.14	4	0.742199	0.742199	0.75096	0.75096	0.00089465	2	0.963	0	0.481
547	LG6(K7)	53.825		0.17	5	0.741801	0.741801	0.751437	0.751437	0.000890698	2.4	0.936	0	0.468
548	LG6(K7)	54.825		0.2	5	0.741414	0.741414	0.751884	0.751884	0.00088656	2.9	0.919	0	0.459
549	LG6(K7)	55.825		0.23	5	0.741046	0.741046	0.752298	0.752298	0.000882361	3.4	0.912	0	0.456
550	LG6(K7)	56.825		0.27	5	0.740705	0.740705	0.752675	0.752675	0.000878228	3.8	0.916	0	0.458
551	LG6(K7)	57.825		0.3	5	0.740397	0.740397	0.753014	0.753014	0.000874281	4.2	0.93	0	0.465
552	LG6(K7)	58.825		0.33	5	0.740126	0.740126	0.753315	0.753315	0.000870623	4.6	0.955	0	0.477
553	LG6(K7)	59.825		0.37	4	0.739896	0.739896	0.753579	0.753579	0.000867335	5	0.989	0	0.495
554	LG6(K7)	60.089	CaiSSRA03M16-170	0.37	4	0.739842	0.739842	0.753643	0.753643	0.000866538	5.1	1	0	0.5
555	LG6(K7)	61.089		0.35	5	0.739889	0.739889	0.753503	0.753503	0.000867722	5	0.945	0	0.472
556	LG6(K7)	62.089		0.33	5	0.739969	0.739969	0.753333	0.753333	0.000869322	4.8	0.899	0	0.449
557	LG6(K7)	63.089		0.31	5	0.740085	0.740085	0.753135	0.753135	0.000871317	4.6	0.862	0	0.431
558	LG6(K7)	64.089		0.29	5	0.740235	0.740235	0.752907	0.752907	0.000873676	4.3	0.833	0	0.416
559	LG6(K7)	65.089		0.27	6	0.740417	0.740417	0.75265	0.75265	0.00087635	4	0.813	0	0.407
560	LG6(K7)	66.089		0.24	6	0.740631	0.740631	0.752364	0.752364	0.00087928	3.7	0.802	0	0.401
561	LG6(K7)	67.089		0.22	6	0.740872	0.740872	0.752052	0.752052	0.000882394	3.4	0.799	0	0.4
562	LG6(K7)	68.089		0.2	6	0.741137	0.741137	0.751716	0.751716	0.000885614	3	0.805	0	0.403
563	LG6(K7)	69.089		0.17	5	0.741423	0.741423	0.751359	0.751359	0.000888857	2.7	0.82	0	0.41
564	LG6(K7)	70.089		0.15	5	0.741722	0.741722	0.750985	0.750985	0.000892042	2.3	0.844	0	0.422
565	LG6(K7)	71.089		0.13	5	0.742032	0.742032	0.750598	0.750598	0.000895096	2	0.876	0	0.438
566	LG6(K7)	72.089		0.11	5	0.742346	0.742346	0.750203	0.750203	0.000897958	1.7	0.917	0	0.458
567	LG6(K7)	73.089		0.1	4	0.742659	0.742659	0.749806	0.749806	0.000900578	1.4	0.966	0	0.483
568	LG6(K7)	73.68	CaiSSRb101	0.09	4	0.742842	0.742842	0.749571	0.749571	0.000901999	1.2	1	0	0.5
569	LG6(K7)	74.68		0.1	4	0.74267	0.74267	0.749865	0.749865	0.000900441	1.4	0.963	0	0.482
570	LG6(K7)	75.68		0.11	4	0.742503	0.742503	0.750161	0.750161	0.000898801	1.6	0.936	0	0.468
571	LG6(K7)	76.68		0.12	4	0.742342	0.742342	0.750455	0.750455	0.000897094	1.7	0.919	0	0.46
572	LG6(K7)	77.68		0.14	4	0.742188	0.742188	0.750748	0.750748	0.000895332	1.9	0.912	0	0.456
573	LG6(K7)	78.68		0.15	4	0.742041	0.742041	0.751038	0.751038	0.000893532	2.1	0.915	0	0.458
574	LG6(K7)	79.68		0.17	4	0.741903	0.741903	0.751324	0.751324	0.000891709	2.3	0.928	0	0.464
575	LG6(K7)	80.68		0.18	4	0.741773	0.741773	0.751605	0.751605	0.000889876	2.5	0.95	0	0.475
576	LG6(K7)	81.68		0.2	4	0.741651	0.741651	0.751879	0.751879	0.000888048	2.7	0.982	0	0.491
577	LG6(K7)	82.127	ATA-cctt170	0.21	4	0.7416	0.7416	0.752	0.752	0.000887236	2.8	1	0	0.5
578	LG7(K7)	0	TAA-caga-320	0.68	4	0.730889	0.730889	0.75125	0.75125	0.00083083	9	1	0	0.5
579	LG7(K7)	1		0.6	6	0.731804	0.731804	0.751298	0.751298	0.000835238	8.5	0.871	0	0.435
580	LG7(K7)	2		0.52	6	0.733421	0.733421	0.751225	0.751225	0.000845203	7.4	0.837	0	0.419
581	LG7(K7)	3		0.43	5	0.735381	0.735381	0.751021	0.751021	0.000858137	6	0.9	0	0.45
582	LG7(K7)	3.696	CaiSSRB06D01	0.37	4	0.73675	0.73675	0.75081	0.75081	0.000867318	5	1	0	0.5
583	LG7(K7)	4.696		0.39	5	0.736498	0.736498	0.751253	0.751253	0.000861946	5.6	0.932	0	0.466
584	LG7(K7)	5.696		0.41	5	0.736483	0.736483	0.751546	0.751546	0.000859165	5.9	0.897	0	0.449
585	LG7(K7)	6.696		0.41	5	0.736672	0.736672	0.751707	0.751707	0.00085882	5.9	0.897	0	0.449
586	LG7(K7)	7.696		0.41	5	0.737026	0.737026	0.751763	0.751763	0.000860461	5.8	0.932	0	0.466
587	LG7(K7)	8.691	GAC-cccc-190	0.4	4	0.7375	0.7375	0.751737	0.751737	0.000863551	5.4	1	0	0.5
588	LG7(K7)	9.562	TAT-ctat-160	0.21	4	0.739385	0.739385	0.7498	0.7498	0.00088716	2.8	1	0	0.5
589	LG7(K7)	10.34	GAT-cggt-190	0.1	4	0.741733	0.741733	0.749	0.749	0.000899968	1.4	1	0	0.5
590	LG7(K7)	11.003	AAA-caca-130	0.3	4	0.737583	0.737583	0.750333	0.750333	0.000875442	4.1	1	0	0.5
591	LG7(K7)	11.082	TTT-ccca-230	0.3	4	0.737583	0.737583	0.750333	0.750333	0.000875442	4.1	1	0	0.5
592	LG7(K7)	11.323	TTG-cgta-110	0.3	4	0.737583	0.737583	0.750333	0.750333	0.000875442	4.1	1	0	0.5
593	LG7(K7)	11.793	LmSSR9-9G	0.21	4	0.739385	0.739385	0.7498	0.7498	0.00088716	2.8	1	0	0.5
594	LG7(K7)	12.359	GTG-ccag-270	0.3	4	0.737583	0.737583	0.750333	0.750333	0.000875442	4.1	1	0	0.5
595	LG7(K7)	12.359	CaiSSRB01P02	0.3	4	0.737583	0.737583	0.750333	0.750333	0.000875442	4.1	1	0	0.5
596	LG7(K7)	13.258	TTT-cgtc-300	0.29	4	0.738231	0.738231	0.75055	0.75055	0.000876826	4	1	0	0.5
597	LG7(K7)	13.258	LmSSR17-8D-280	0.29	4	0.738231	0.738231	0.75055	0.75055	0.000876826	4	1	0	0.5
598	LG7(K7)	13.721	LmSSRFL33A9*	0.29	4	0.738231	0.738231	0.75055	0.75055	0.000876826	4	1	0	0.5
599	LG7(K7)	13.727	LmSSR10-12D-270	0.29	4	0.738231	0.738231	0.75055	0.75055	0.000876826	4	1	0	0.5
600	LG7(K7)	13.874	TTA-ccct	0.29	4	0.738231	0.738231	0.75055	0.75055	0.000876826	4	1	0	0.5
601	LG7(K7)	14.133	LmSSR10-12D-280	0.3	4	0.737583	0.737583	0.750333	0.750333	0.000875442	4.1	1	0	0.5
602	LG7(K7)	14.991	LmSSR11-2E-450	0.16	4	0.7405	0.7405	0.749526	0.749526	0.000893159	2.2	1	0	0.5
603	LG7(K7)	15.355	CaiSSRA01A09-220	0.1	4	0.741867	0.741867	0.748889	0.748889	0.000900834	1.3	1	0	0.5
604	LG7(K7)	15.758	TTC-cccg-190	0.2	4	0.739857	0.739857	0.75	0.75	0.000887931	2.8	1	0	0.5
605	LG7(K7)	16.758		0.13	5	0.740965	0.740965	0.749422	0.749422	0.000895432	1.9	0.937	0	0.468
606	LG7(K7)	17.284	ATC-cgct380	0.1	4	0.7418	0.7418	0.748944	0.748944	0.000900404	1.4	1	0	0.5
607	LG7(K7)	18.284		0.14	4	0.740963	0.740963	0.749335	0.749335	0.000895837	1.9	0.967	0	0.484
608	LG7(K7)	18.878	TAC-cctc-280	0.16	4	0.7405	0.7405	0.749526	0.749526	0.000893159	2.2	1	0	0.5
609	LG7(K7)	19.878		0.16	4	0.7405	0.7405	0.749526	0.749526	0.000893158	2.2	0.994	0	0.497
610	LG7(K7)	20.069	CaiSSRB01J02-310	0.16	4	0.7405	0.7405	0.749526	0.749526	0.000893159	2.2	1	0	0.5
611	LG7(K7)	21.069		0.03	11	0.742079	0.742079	0.74828	0.74828	0.000903714	1	0.87	0	0.435
612	LG7(K7)	22.069		0.05	8	0.749836	0.749836	0.742945	0.742945	0.000901669	1.2	0.89	0	0.445
613	LG7(K7)	22.799	LmSSRT132E-110*	0.14	4	0.750923	0.750923	0.7423	0.7423	0.000895307	1.9	1	0	0.5
614	LG7(K7)	23.799		0.03	13	0.749445	0.749445	0.74301	0.74301	0.000902986	1.1	0.839	0	0.42
615	LG7(K7)	24.799		0.04	6	0.742737	0.742737	0.748094	0.748094	0.000905963	0.8	0.928	0	0.464
616	LG7(K7)	25.088	TTG-cccc	0.07	4	0.742533	0.742533	0.748333	0.748333	0.000904719	0.9	1	0	0.5
617	LG7(K7)	26.088		0.04	4	0.743153	0.743153	0.747806	0.747806	0.000907694	0.6	0.952	0	0.476
618	LG7(K7)	27.088		0.02	4	0.743839	0.743839	0.747239	0.747239	0.000910194	0.3	0.942	0	0.471
619	LG7(K7)	28.088		0.01	4	0.744551	0.744551	0.74665	0.74665	0.000911968	0.1	0.969	0	0.485
620	LG7(K7)	28.628	LmSSRS363H7*	0	4	0.744933	0.744933	0.746333	0.746333	0.000912574	0.1	1	0	0.5
621	LG7(K7)	29.628		0.01	4	0.74428	0.74428	0.746844	0.746844	0.000911434	0.2	0.919	0	0.459
622	LG7(K7)	30.628		0.03	5	0.743571	0.743571	0.747364	0.747364	0.000909514	0.4	0.857	0	0.428
623	LG7(K7)	31.628		0.05	5	0.742817	0.742817	0.747881	0.747881	0.000906768	0.7	0.814	0	0.407
624	LG7(K7)	32.628		0.07	5	0.742036	0.742036	0.748382	0.748382	0.000903227	1.1	0.789	0	0.395
625	LG7(K7)	33.628		0.1	5	0.74125	0.74125	0.748856	0.748856	0.000899011	1.5	0.784	0	0.392
626	LG7(K7)	34.628		0.14	5	0.740487	0.740487	0.749292	0.749292	0.000894326	2.1	0.797	0	0.399
627	LG7(K7)	35.628		0.17	5	0.739774	0.739774	0.749686	0.749686	0.000889429	2.6	0.829	0	0.415
628	LG7(K7)	36.628		0.22	5	0.739134	0.739134	0.750035	0.750035	0.000884587	3.1	0.88	0	0.44
629	LG7(K7)	37.628		0.26	5	0.738584	0.738584	0.750341	0.750341	0.000880028	3.6	0.95	0	0.475
630	LG7(K7)	38.211	CaiSSRB08L24	0.28	4	0.738308	0.738308	0.7505	0.7505	0.000877569	3.9	1	0	0.5
631	LG7(K7)	39.211		0.18	5	0.739681	0.739681	0.74974	0.74974	0.000888737	2.7	0.838	0	0.419
632	LG7(K7)	40.211		0.1	5	0.741338	0.741338	0.748796	0.748796	0.000899549	1.5	0.74	0	0.37
633	LG7(K7)	41.211		0.04	5	0.743108	0.743108	0.747675	0.747675	0.00090794	0.6	0.705	0	0.353
634	LG7(K7)	42.211		0	5	0.74481	0.74481	0.746428	0.746428	0.000912411	0.1	0.734	0	0.367
635	LG7(K7)	43.211		0	4	0.746321	0.746321	0.745145	0.745145	0.000912715	0	0.826	0	0.413
636	LG7(K7)	44.211		0.03	4	0.747591	0.747591	0.743922	0.743922	0.000909698	0.4	0.981	0	0.491
637	LG7(K7)	44.296	TAC-cagc-110	0.03	4	0.747688	0.747688	0.743824	0.743824	0.000909331	0.4	0.997	0	0.499
638	LG1(N4)	0	LmSSR16-6G-250	0.43	4	0.739421	0.754214	0.739421	0.754214	0.000859606	5.9	0	1	0.5
639	LG1(N4)	1		0.43	5	0.739191	0.754281	0.739191	0.754281	0.000857211	6.1	0	0.95	0.475
640	LG1(N4)	2		0.43	5	0.738963	0.754343	0.738963	0.754343	0.00085484	6.4	0	0.906	0.453
641	LG1(N4)	3		0.42	6	0.738738	0.754398	0.738738	0.754398	0.000852511	6.6	0	0.868	0.434
642	LG1(N4)	4		0.42	6	0.738518	0.754446	0.738518	0.754446	0.00085025	6.9	0	0.836	0.418
643	LG1(N4)	5		0.41	7	0.738304	0.754486	0.738304	0.754486	0.000848084	7.1	0	0.81	0.405
644	LG1(N4)	6		0.4	7	0.738098	0.754516	0.738098	0.754516	0.000846052	7.3	0	0.79	0.395
645	LG1(N4)	7		0.38	7	0.737904	0.754533	0.737904	0.754533	0.0008442	7.5	0	0.777	0.388
646	LG1(N4)	8		0.37	8	0.737724	0.754536	0.737724	0.754536	0.000842589	7.7	0	0.769	0.384
647	LG1(N4)	9		0.35	8	0.737564	0.754518	0.737564	0.754518	0.000841322	7.9	0	0.767	0.383
648	LG1(N4)	10		0.32	9	0.737433	0.754472	0.737433	0.754472	0.000840537	7.9	0	0.77	0.385
649	LG1(N4)	11		0.29	10	0.737343	0.754383	0.737343	0.754383	0.000840496	7.9	0	0.78	0.39
650	LG1(N4)	12		0.25	11	0.737326	0.754222	0.737326	0.754222	0.000841696	7.8	0	0.796	0.398
651	LG1(N4)	13		0.21	13	0.737448	0.753916	0.737448	0.753916	0.000845262	7.4	0	0.818	0.409
652	LG1(N4)	14		0.15	17	0.737936	0.753234	0.737936	0.753234	0.000854564	6.4	0	0.845	0.423
653	LG1(N4)	15		0.08	22	0.739922	0.751065	0.739922	0.751065	0.000882061	3.4	0	0.879	0.44
654	LG1(N4)	16		0.04	10	0.742452	0.748562	0.742452	0.748562	0.000903763	1	0	0.919	0.46
655	LG1(N4)	17		0.02	6	0.743625	0.747461	0.743625	0.747461	0.000909404	0.4	0	0.965	0.483
656	LG1(N4)	17.681	TTA-ccga-500	0.02	4	0.744133	0.747	0.744133	0.747	0.000911022	0.2	0	1	0.5
657	LG1(N4)	18.681		0.3	11	0.736568	0.754396	0.736568	0.754396	0.000833642	8.7	0	0.941	0.47
658	LG1(N4)	19.681		0.5	7	0.736523	0.754804	0.736523	0.754804	0.000829511	9.2	0	0.932	0.466
659	LG1(N4)	20.681		0.59	5	0.737094	0.75466	0.737094	0.75466	0.000835952	8.4	0	0.974	0.487
660	LG1(N4)	21.015	GTA-ccaa-170	0.61	4	0.737353	0.754563	0.737353	0.754563	0.000839085	8.1	0	1	0.5
661	LG1(N4)	22.015		0.63	5	0.737158	0.754809	0.737158	0.754809	0.000835253	8.5	0	0.946	0.473
662	LG1(N4)	23.015		0.65	5	0.737018	0.755032	0.737018	0.755032	0.000832038	8.9	0	0.908	0.454
663	LG1(N4)	24.015		0.67	5	0.73693	0.755237	0.73693	0.755237	0.000829419	9.2	0	0.885	0.443
664	LG1(N4)	25.015		0.69	5	0.736887	0.755426	0.736887	0.755426	0.00082735	9.4	0	0.878	0.439
665	LG1(N4)	26.015		0.7	5	0.736884	0.755602	0.736884	0.755602	0.000825773	9.6	0	0.887	0.443
666	LG1(N4)	27.015		0.72	5	0.736917	0.755768	0.736917	0.755768	0.000824629	9.7	0	0.911	0.456
667	LG1(N4)	28.015		0.73	5	0.736978	0.755928	0.736978	0.755928	0.000823861	9.8	0	0.951	0.475
668	LG1(N4)	28.913	CaiSSRB01A19-140	0.74	4	0.737056	0.756067	0.737056	0.756067	0.000823451	9.8	0	1	0.5
669	LG1(N4)	29.913		0.74	4	0.73692	0.755892	0.73692	0.755892	0.000823586	9.8	0	0.944	0.472
670	LG1(N4)	30.913		0.74	4	0.736781	0.755721	0.736781	0.755721	0.000823684	9.8	0	0.929	0.465
671	LG1(N4)	31.913		0.74	4	0.736637	0.755556	0.736637	0.755556	0.000823743	9.8	0	0.955	0.477
672	LG1(N4)	32.652	LmSSR16-6G-180	0.74	4	0.736529	0.755437	0.736529	0.755437	0.000823763	9.8	0	1	0.5
673	LG1(N4)	33.652		0.85	6	0.735485	0.756539	0.735485	0.756539	0.000802334	12.1	0	0.911	0.455
674	LG1(N4)	34.652		0.87	6	0.735193	0.756187	0.735193	0.756187	0.000802878	12.1	0	0.936	0.468
675	LG1(N4)	35.219	TAA-caga-590	0.84	4	0.735313	0.755471	0.735313	0.755471	0.000811566	11.1	0	1	0.5
676	LG1(N4)	36.219		0.81	5	0.735335	0.755373	0.735335	0.755373	0.000812805	11	0	0.953	0.476
677	LG1(N4)	37.219		0.78	5	0.735416	0.755214	0.735416	0.755214	0.000815217	10.7	0	0.921	0.46
678	LG1(N4)	38.219		0.73	6	0.735561	0.754978	0.735561	0.754978	0.000818987	10.3	0	0.905	0.452
679	LG1(N4)	39.219		0.68	6	0.735781	0.754646	0.735781	0.754646	0.000824323	9.7	0	0.904	0.452
680	LG1(N4)	40.219		0.63	6	0.736091	0.754198	0.736091	0.754198	0.000831396	8.9	0	0.919	0.46
681	LG1(N4)	41.219		0.57	5	0.736506	0.753624	0.736506	0.753624	0.000840207	8	0	0.95	0.475
682	LG1(N4)	42.219		0.51	4	0.737033	0.752931	0.737033	0.752931	0.000850385	6.9	0	0.997	0.498
683	LG1(N4)	42.276	TAC-ccag-50	0.5	4	0.737067	0.752889	0.737067	0.752889	0.000850991	6.8	0	1	0.5
684	LG1(N4)	43.276		0.5	5	0.737075	0.753228	0.737075	0.753228	0.000848125	7.1	0	0.917	0.458
685	LG1(N4)	44.276		0.48	6	0.737289	0.753301	0.737289	0.753301	0.000849123	7	0	0.883	0.441
686	LG1(N4)	45.276		0.45	5	0.7377	0.753102	0.7377	0.753102	0.000853845	6.5	0	0.899	0.449
687	LG1(N4)	46.276		0.4	5	0.738302	0.752638	0.738302	0.752638	0.000861733	5.6	0	0.964	0.482
688	LG1(N4)	46.638	CaiSSRB06A04-230	0.39	4	0.738563	0.752412	0.738563	0.752412	0.000865153	5.2	0	1	0.5
689	LG1(N4)	47.638		0.39	4	0.738562	0.752412	0.738562	0.752412	0.000865146	5.2	0	0.943	0.471
690	LG1(N4)	48.638		0.39	4	0.738562	0.752412	0.738562	0.752412	0.00086515	5.2	0	0.971	0.486
691	LG1(N4)	48.972	LmSSR16-2F	0.39	4	0.738563	0.752412	0.738563	0.752412	0.000865153	5.2	0	1	0.5
692	LG1(N4)	49.972		0.39	4	0.738562	0.752412	0.738562	0.752412	0.000865147	5.2	0	0.965	0.482
693	LG1(N4)	50.972		0.39	4	0.738562	0.752412	0.738562	0.752412	0.000865151	5.2	0	0.987	0.494
694	LG1(N4)	51.195	CaiSSRB06A04-200	0.39	4	0.738563	0.752412	0.738563	0.752412	0.000865153	5.2	0	1	0.5
695	LG1(N4)	52.195		0.39	4	0.738562	0.752412	0.738562	0.752412	0.000865148	5.2	0	0.965	0.482
696	LG1(N4)	53.155	LmSSRpre8*	0.39	4	0.738563	0.752412	0.738563	0.752412	0.000865153	5.2	0	1	0.5
697	LG1(N4)	53.155	ATC-cgct250	0.39	4	0.738563	0.752412	0.738563	0.752412	0.000865153	5.2	0	1	0.5
698	LG1(N4)	54.155		0.39	4	0.738562	0.752412	0.738562	0.752412	0.000865149	5.2	0	0.954	0.477
699	LG1(N4)	54.995	GAT-ctat-190	0.39	4	0.738563	0.752412	0.738563	0.752412	0.000865153	5.2	0	1	0.5
700	LG1(N4)	55.995		0.19	8	0.739625	0.751581	0.739625	0.751581	0.000877334	3.9	0	0.924	0.462
701	LG1(N4)	56.995		0	4	0.74573	0.745666	0.74573	0.745666	0.000913059	0	0	0.934	0.467
702	LG1(N4)	57.757	CaiSSRD09J21-160	0.06	4	0.748437	0.743118	0.748437	0.743118	0.000905991	0.8	0	1	0.5
703	LG1(N4)	58.757		0	13	0.744857	0.746567	0.744857	0.746567	0.000912329	0.1	0	0.924	0.462
704	LG1(N4)	59.757		0.14	7	0.741052	0.751036	0.741052	0.751036	0.000888261	2.7	0	0.936	0.468
705	LG1(N4)	60.471	TCT-catt-150	0.23	4	0.740778	0.7516	0.740778	0.7516	0.000884022	3.2	0	1	0.5
706	LG1(N4)	61.331	CaiSSRB02M22-310	0.29	4	0.739882	0.751875	0.739882	0.751875	0.000877137	3.9	0	1	0.5
707	LG1(N4)	61.331	CaiSSRB02M22-290	0.29	4	0.739882	0.751875	0.739882	0.751875	0.000877137	3.9	0	1	0.5
708	LG1(N4)	61.331	CaiSSRD03H10-250	0.29	4	0.739882	0.751875	0.739882	0.751875	0.000877137	3.9	0	1	0.5
709	LG1(N4)	62.331		0.17	4	0.741504	0.750708	0.741504	0.750708	0.00089205	2.3	0	0.999	0.499
710	LG1(N4)	62.357	GCT-cgct-500	0.16	4	0.741555	0.750667	0.741555	0.750667	0.000892477	2.3	0	1	0.5
711	LG1(N4)	63.357		0.21	4	0.740669	0.750984	0.740669	0.750984	0.00088648	2.9	0	0.953	0.477
712	LG1(N4)	64.282	AGC-cgat210	0.24	4	0.74	0.751059	0.74	0.751059	0.000882513	3.3	0	1	0.5
713	LG1(N4)	65.147	ATA-cgaa150	0.24	4	0.74	0.751059	0.74	0.751059	0.000882513	3.3	0	1	0.5
714	LG1(N4)	66.147		0.17	5	0.740994	0.750452	0.740994	0.750452	0.000890698	2.4	0	0.893	0.446
715	LG1(N4)	67.147		0.1	5	0.742098	0.749618	0.742098	0.749618	0.000898949	1.5	0	0.852	0.426
716	LG1(N4)	68.147		0.05	5	0.743248	0.748579	0.743248	0.748579	0.000906001	0.8	0	0.877	0.439
717	LG1(N4)	69.147		0.02	4	0.744343	0.74742	0.744343	0.74742	0.000910727	0.3	0	0.97	0.485
718	LG1(N4)	69.293	GCT-cgct-110	0.01	4	0.744493	0.747247	0.744493	0.747247	0.000911193	0.2	0	0.989	0.494
719	LG1(N4)	70.293		0.03	4	0.743962	0.747761	0.743962	0.747761	0.000909479	0.4	0	0.879	0.439
720	LG1(N4)	71.293		0.04	5	0.743392	0.748232	0.743392	0.748232	0.000907216	0.6	0	0.817	0.408
721	LG1(N4)	72.293		0.06	5	0.742805	0.748639	0.742805	0.748639	0.00090455	0.9	0	0.803	0.401
722	LG1(N4)	73.293		0.09	5	0.742225	0.748969	0.742225	0.748969	0.000901699	1.2	0	0.837	0.418
723	LG1(N4)	74.293		0.11	4	0.741675	0.749215	0.741675	0.749215	0.000898911	1.5	0	0.918	0.459
724	LG1(N4)	74.964	TTC-cgtc-150	0.13	4	0.741333	0.749333	0.741333	0.749333	0.000897192	1.7	0	1	0.5
725	LG1(N4)	75.964		0.12	4	0.741214	0.749283	0.741214	0.749283	0.000896987	1.8	0	0.93	0.465
726	LG1(N4)	76.964		0.12	5	0.741132	0.749205	0.741132	0.749205	0.000897043	1.8	0	0.887	0.443
727	LG1(N4)	77.964		0.12	5	0.741089	0.749103	0.741089	0.749103	0.000897364	1.7	0	0.869	0.434
728	LG1(N4)	78.964		0.11	5	0.741085	0.748976	0.741085	0.748976	0.000897937	1.7	0	0.877	0.439
729	LG1(N4)	79.964		0.11	4	0.741122	0.748828	0.741122	0.748828	0.000898736	1.6	0	0.912	0.456
730	LG1(N4)	80.964		0.1	4	0.741197	0.748661	0.741197	0.748661	0.000899718	1.5	0	0.973	0.486
731	LG1(N4)	81.312	ATA-ccat170	0.1	4	0.741231	0.7486	0.741231	0.7486	0.000900094	1.4	0	1	0.5
732	LG2(N4)	0	GAT-cggc	0.35	4	0.737538	0.751	0.737538	0.751	0.000869795	4.7	0	1	0.5
733	LG2(N4)	1		0.3	4	0.738213	0.750831	0.738213	0.750831	0.000874639	4.2	0	0.94	0.47
734	LG2(N4)	2		0.26	5	0.738907	0.750634	0.738907	0.750634	0.000879539	3.7	0	0.904	0.452
735	LG2(N4)	3		0.22	5	0.739606	0.750408	0.739606	0.750408	0.000884364	3.1	0	0.892	0.446
736	LG2(N4)	4		0.19	4	0.740298	0.750155	0.740298	0.750155	0.00088899	2.6	0	0.905	0.453
737	LG2(N4)	5		0.15	4	0.740968	0.749873	0.740968	0.749873	0.00089331	2.2	0	0.943	0.472
738	LG2(N4)	5.928	LmSSR2-12F-300	0.13	4	0.741563	0.749588	0.741563	0.749588	0.000896971	1.8	0	1	0.5
739	LG2(N4)	6.928		0.14	4	0.741351	0.749675	0.741351	0.749675	0.000895771	1.9	0	0.967	0.484
740	LG2(N4)	7.928		0.15	4	0.741142	0.749756	0.741142	0.749756	0.00089457	2	0	0.952	0.476
741	LG2(N4)	8.928		0.16	4	0.740937	0.749831	0.740937	0.749831	0.00089338	2.2	0	0.955	0.478
742	LG2(N4)	9.928		0.17	4	0.740736	0.7499	0.740736	0.7499	0.000892209	2.3	0	0.975	0.488
743	LG2(N4)	10.623	TAT-cagt-300	0.17	4	0.7406	0.749944	0.7406	0.749944	0.00089141	2.4	0	1	0.5
744	LG2(N4)	11.623		0.17	4	0.7406	0.749944	0.7406	0.749944	0.00089141	2.4	0	0.996	0.498
745	LG2(N4)	11.664	GCG-cgcg-210	0.17	4	0.7406	0.749944	0.7406	0.749944	0.00089141	2.4	0	1	0.5
746	LG2(N4)	12.664		0.17	4	0.740599	0.749946	0.740599	0.749946	0.000891397	2.4	0	0.967	0.484
747	LG2(N4)	13.664		0.17	4	0.740598	0.749947	0.740598	0.749947	0.000891391	2.4	0	0.952	0.476
748	LG2(N4)	14.664		0.17	4	0.740598	0.749946	0.740598	0.749946	0.000891393	2.4	0	0.955	0.478
749	LG2(N4)	15.664		0.17	4	0.740599	0.749946	0.740599	0.749946	0.000891401	2.4	0	0.976	0.488
750	LG2(N4)	16.322	ATC-cggt80	0.17	4	0.7406	0.749944	0.7406	0.749944	0.00089141	2.4	0	1	0.5
751	LG2(N4)	17.322		0.17	4	0.740798	0.749965	0.740798	0.749965	0.000892151	2.3	0	0.978	0.489
752	LG2(N4)	18.322		0.16	4	0.740992	0.749985	0.740992	0.749985	0.000892884	2.2	0	0.982	0.491
753	LG2(N4)	19.016	GAG-cacc-260	0.16	4	0.741125	0.75	0.741125	0.75	0.000893386	2.2	0	1	0.5
754	LG2(N4)	19.016	GTT-cgag-180	0.16	4	0.741125	0.75	0.741125	0.75	0.000893386	2.2	0	1	0.5
755	LG2(N4)	20.016		0.16	4	0.741125	0.75	0.741125	0.75	0.000893385	2.2	0	0.991	0.496
756	LG2(N4)	20.358	ATA-cctt160	0.16	4	0.741125	0.75	0.741125	0.75	0.000893386	2.2	0	1	0.5
757	LG2(N4)	21.358		0.17	5	0.740867	0.750251	0.740867	0.750251	0.000891066	2.4	0	0.967	0.483
758	LG2(N4)	22.358		0.18	5	0.740638	0.750472	0.740638	0.750472	0.000888899	2.6	0	0.943	0.472
759	LG2(N4)	23.358		0.2	5	0.740441	0.75066	0.740441	0.75066	0.000886974	2.9	0	0.929	0.465
760	LG2(N4)	24.358		0.21	5	0.74028	0.75081	0.74028	0.75081	0.000885358	3	0	0.924	0.462
761	LG2(N4)	25.358		0.22	5	0.740155	0.750924	0.740155	0.750924	0.000884094	3.2	0	0.929	0.465
762	LG2(N4)	26.358		0.23	5	0.740068	0.751002	0.740068	0.751002	0.000883201	3.3	0	0.943	0.472
763	LG2(N4)	27.358		0.24	5	0.740017	0.751046	0.740017	0.751046	0.000882679	3.3	0	0.967	0.483
764	LG2(N4)	28.354	AGT-cgat250	0.24	4	0.74	0.751059	0.74	0.751059	0.000882513	3.3	0	1	0.5
765	LG2(N4)	28.354	LmSSR9-7G-140*	0.24	4	0.74	0.751059	0.74	0.751059	0.000882513	3.3	0	1	0.5
766	LG2(N4)	29.354		0.31	4	0.73894	0.751489	0.73894	0.751489	0.000873926	4.3	0	0.991	0.495
767	LG2(N4)	29.732	LmSSR11-4H120*	0.34	4	0.7386	0.751611	0.7386	0.751611	0.000871087	4.6	0	1	0.5
768	LG2(N4)	30.732		0.34	4	0.738497	0.751568	0.738497	0.751568	0.000870792	4.6	0	0.971	0.486
769	LG2(N4)	31.732		0.34	4	0.738393	0.751525	0.738393	0.751525	0.000870496	4.7	0	0.955	0.477
770	LG2(N4)	32.732		0.34	4	0.738289	0.751482	0.738289	0.751482	0.000870201	4.7	0	0.95	0.475
771	LG2(N4)	33.732		0.35	4	0.738183	0.75144	0.738183	0.75144	0.000869907	4.7	0	0.958	0.479
772	LG2(N4)	34.732		0.35	4	0.738077	0.751398	0.738077	0.751398	0.000869616	4.8	0	0.978	0.489
773	LG2(N4)	35.458	ATA-cgaa260	0.35	4	0.738	0.751368	0.738	0.751368	0.000869407	4.8	0	1	0.5
774	LG2(N4)	36.458		0.35	4	0.738	0.751369	0.738	0.751369	0.000869405	4.8	0	0.983	0.492
775	LG2(N4)	36.756	TAG-cagg-310	0.35	4	0.738	0.751368	0.738	0.751368	0.000869407	4.8	0	1	0.5
776	LG2(N4)	37.756		0.33	4	0.738244	0.75128	0.738244	0.75128	0.000871447	4.6	0	0.963	0.482
777	LG2(N4)	38.756		0.31	5	0.7385	0.751183	0.7385	0.751183	0.000873579	4.3	0	0.933	0.467
778	LG2(N4)	39.756		0.29	5	0.738769	0.751076	0.738769	0.751076	0.000875792	4.1	0	0.91	0.455
779	LG2(N4)	40.756		0.27	5	0.739049	0.75096	0.739049	0.75096	0.000878072	3.8	0	0.895	0.447
780	LG2(N4)	41.756		0.25	5	0.739339	0.750833	0.739339	0.750833	0.000880402	3.6	0	0.886	0.443
781	LG2(N4)	42.756		0.23	5	0.739638	0.750697	0.739638	0.750697	0.000882762	3.3	0	0.884	0.442
782	LG2(N4)	43.756		0.21	5	0.739943	0.750551	0.739943	0.750551	0.000885132	3.1	0	0.888	0.444
783	LG2(N4)	44.756		0.2	5	0.740254	0.750395	0.740254	0.750395	0.000887488	2.8	0	0.9	0.45
784	LG2(N4)	45.756		0.18	5	0.740567	0.75023	0.740567	0.75023	0.000889807	2.5	0	0.919	0.46
785	LG2(N4)	46.756		0.16	4	0.740881	0.750056	0.740881	0.750056	0.000892068	2.3	0	0.945	0.472
786	LG2(N4)	47.756		0.15	4	0.741194	0.749874	0.741194	0.749874	0.000894248	2.1	0	0.978	0.489
787	LG2(N4)	48.341	ATA-cggt120	0.14	4	0.741375	0.749765	0.741375	0.749765	0.000895479	1.9	0	1	0.5
788	LG2(N4)	49.341		0.12	4	0.741615	0.74958	0.741615	0.74958	0.000897211	1.7	0	0.963	0.481
789	LG2(N4)	50.341		0.11	4	0.741864	0.749383	0.741864	0.749383	0.000898932	1.5	0	0.93	0.465
790	LG2(N4)	51.341		0.09	5	0.742122	0.749175	0.742122	0.749175	0.000900626	1.4	0	0.902	0.451
791	LG2(N4)	52.341		0.08	5	0.742388	0.748956	0.742388	0.748956	0.000902277	1.2	0	0.877	0.439
792	LG2(N4)	53.341		0.07	5	0.742661	0.748725	0.742661	0.748725	0.000903866	1	0	0.858	0.429
793	LG2(N4)	54.341		0.06	5	0.742939	0.748483	0.742939	0.748483	0.000905375	0.8	0	0.842	0.421
794	LG2(N4)	55.341		0.05	5	0.743222	0.748231	0.743222	0.748231	0.000906787	0.7	0	0.831	0.415
795	LG2(N4)	56.341		0.04	5	0.743508	0.747969	0.743508	0.747969	0.000908085	0.5	0	0.824	0.412
796	LG2(N4)	57.341		0.03	5	0.743795	0.747699	0.743795	0.747699	0.000909253	0.4	0	0.821	0.41
797	LG2(N4)	58.341		0.02	5	0.744083	0.74742	0.744083	0.74742	0.000910278	0.3	0	0.822	0.411
798	LG2(N4)	59.341		0.01	5	0.744369	0.747135	0.744369	0.747135	0.000911149	0.2	0	0.828	0.414
799	LG2(N4)	60.341		0.01	4	0.744651	0.746845	0.744651	0.746845	0.000911859	0.1	0	0.838	0.419
800	LG2(N4)	61.341		0	4	0.74493	0.746552	0.74493	0.746552	0.000912403	0.1	0	0.852	0.426
801	LG2(N4)	62.341		0	4	0.745201	0.746257	0.745201	0.746257	0.000912782	0	0	0.87	0.435
802	LG2(N4)	63.341		0	4	0.745466	0.745962	0.745466	0.745962	0.000912998	0	0	0.893	0.446
803	LG2(N4)	64.341		0	3	0.745721	0.745669	0.745721	0.745669	0.000913059	0	0	0.92	0.46
804	LG2(N4)	65.341		0	4	0.745965	0.745381	0.745965	0.745381	0.000912975	0	0	0.951	0.475
805	LG2(N4)	66.341		0	4	0.746199	0.745097	0.746199	0.745097	0.000912759	0	0	0.986	0.493
806	LG2(N4)	66.691	CaiSSRD01B11-250	0	4	0.746278	0.745	0.746278	0.745	0.000912655	0	0	1	0.5
807	LG2(N4)	66.691	LmSSR13-4G	0	4	0.746278	0.745	0.746278	0.745	0.000912655	0	0	1	0.5
808	LG2(N4)	66.691	CaiSSRD01B11-200	0	4	0.746278	0.745	0.746278	0.745	0.000912655	0	0	1	0.5
809	LG2(N4)	66.691	TTA-ctca-700	0	4	0.746278	0.745	0.746278	0.745	0.000912655	0	0	1	0.5
810	LG2(N4)	66.691	TAC-ctgc	0	4	0.746278	0.745	0.746278	0.745	0.000912655	0	0	1	0.5
811	LG2(N4)	67.691		0	4	0.746083	0.745233	0.746083	0.745233	0.000912881	0	0	0.964	0.482
812	LG2(N4)	68.691		0	3	0.745882	0.745475	0.745882	0.745475	0.000913019	0	0	0.944	0.472
813	LG2(N4)	69.691		0	3	0.745678	0.74572	0.745678	0.74572	0.000913059	0	0	0.939	0.47
814	LG2(N4)	70.691		0	3	0.745474	0.745964	0.745474	0.745964	0.000913	0	0	0.951	0.475
815	LG2(N4)	71.691		0	4	0.745275	0.746203	0.745275	0.746203	0.000912846	0	0	0.978	0.489
816	LG2(N4)	72.251	GAC-cgtt-360	0	4	0.745167	0.746333	0.745167	0.746333	0.000912722	0	0	1	0.5
817	LG2(N4)	73.251		0	3	0.745365	0.746102	0.745365	0.746102	0.000912925	0	0	0.934	0.467
818	LG2(N4)	74.251		0	3	0.745566	0.74586	0.745566	0.74586	0.000913038	0	0	0.888	0.444
819	LG2(N4)	75.251		0	3	0.745766	0.74561	0.745766	0.74561	0.000913054	0	0	0.862	0.431
820	LG2(N4)	76.251		0	4	0.745966	0.745353	0.745966	0.745353	0.000912967	0	0	0.856	0.428
821	LG2(N4)	77.251		0	4	0.746161	0.745094	0.746161	0.745094	0.00091278	0	0	0.87	0.435
822	LG2(N4)	78.251		0	4	0.746349	0.744834	0.746349	0.744834	0.000912497	0.1	0	0.904	0.452
823	LG2(N4)	79.251		0.01	4	0.74653	0.744577	0.74653	0.744577	0.000912126	0.1	0	0.959	0.479
824	LG2(N4)	79.836	GAG-cccg-200	0.01	4	0.746632	0.744429	0.746632	0.744429	0.000911874	0.1	0	1	0.5
825	LG3(N4)	0	TAA-ctga-480	0.22	4	0.740588	0.751125	0.740588	0.751125	0.000885329	3	0	1	0.5
826	LG3(N4)	1		0.22	4	0.740481	0.751194	0.740481	0.751194	0.000884386	3.1	0	0.962	0.481
827	LG3(N4)	2		0.23	5	0.740375	0.751261	0.740375	0.751261	0.000883445	3.2	0	0.927	0.463
828	LG3(N4)	3		0.23	5	0.74027	0.751326	0.74027	0.751326	0.00088251	3.3	0	0.894	0.447
829	LG3(N4)	4		0.24	5	0.740167	0.751388	0.740167	0.751388	0.000881584	3.4	0	0.864	0.432
830	LG3(N4)	5		0.24	5	0.740065	0.751448	0.740065	0.751448	0.000880671	3.5	0	0.835	0.418
831	LG3(N4)	6		0.24	5	0.739965	0.751504	0.739965	0.751504	0.000879774	3.6	0	0.81	0.405
832	LG3(N4)	7		0.25	6	0.739868	0.751558	0.739868	0.751558	0.000878898	3.7	0	0.786	0.393
833	LG3(N4)	8		0.25	6	0.739774	0.751608	0.739774	0.751608	0.000878046	3.8	0	0.765	0.382
834	LG3(N4)	9		0.25	6	0.739682	0.751655	0.739682	0.751655	0.000877223	3.9	0	0.746	0.373
835	LG3(N4)	10		0.26	6	0.739593	0.751698	0.739593	0.751698	0.000876432	4	0	0.729	0.364
836	LG3(N4)	11		0.26	6	0.739508	0.751737	0.739508	0.751737	0.000875677	4.1	0	0.714	0.357
837	LG3(N4)	12		0.26	6	0.739426	0.751772	0.739426	0.751772	0.000874962	4.2	0	0.702	0.351
838	LG3(N4)	13		0.27	6	0.739348	0.751803	0.739348	0.751803	0.00087429	4.2	0	0.691	0.346
839	LG3(N4)	14		0.27	6	0.739274	0.75183	0.739274	0.75183	0.000873665	4.3	0	0.683	0.341
840	LG3(N4)	15		0.27	6	0.739205	0.751853	0.739205	0.751853	0.000873091	4.4	0	0.676	0.338
841	LG3(N4)	16		0.28	6	0.73914	0.751872	0.73914	0.751872	0.00087257	4.4	0	0.672	0.336
842	LG3(N4)	17		0.28	6	0.739079	0.751886	0.739079	0.751886	0.000872106	4.5	0	0.67	0.335
843	LG3(N4)	18		0.28	6	0.739024	0.751895	0.739024	0.751895	0.0008717	4.5	0	0.67	0.335
844	LG3(N4)	19		0.28	6	0.738974	0.7519	0.738974	0.7519	0.000871356	4.6	0	0.672	0.336
845	LG3(N4)	20		0.29	6	0.738929	0.7519	0.738929	0.7519	0.000871076	4.6	0	0.675	0.338
846	LG3(N4)	21		0.29	6	0.738889	0.751895	0.738889	0.751895	0.000870861	4.6	0	0.681	0.341
847	LG3(N4)	22		0.29	6	0.738855	0.751886	0.738855	0.751886	0.000870713	4.6	0	0.689	0.345
848	LG3(N4)	23		0.29	6	0.738826	0.751872	0.738826	0.751872	0.000870633	4.6	0	0.7	0.35
849	LG3(N4)	24		0.29	6	0.738803	0.751853	0.738803	0.751853	0.000870621	4.6	0	0.712	0.356
850	LG3(N4)	25		0.3	6	0.738786	0.751829	0.738786	0.751829	0.000870679	4.6	0	0.726	0.363
851	LG3(N4)	26		0.3	6	0.738774	0.751801	0.738774	0.751801	0.000870805	4.6	0	0.743	0.371
852	LG3(N4)	27		0.3	6	0.738769	0.751768	0.738769	0.751768	0.000870999	4.6	0	0.761	0.381
853	LG3(N4)	28		0.3	6	0.738769	0.75173	0.738769	0.75173	0.000871261	4.6	0	0.782	0.391
854	LG3(N4)	29		0.3	6	0.738775	0.751688	0.738775	0.751688	0.000871589	4.5	0	0.805	0.403
855	LG3(N4)	30		0.3	5	0.738786	0.751641	0.738786	0.751641	0.000871981	4.5	0	0.831	0.415
856	LG3(N4)	31		0.3	5	0.738804	0.75159	0.738804	0.75159	0.000872435	4.4	0	0.858	0.429
857	LG3(N4)	32		0.3	5	0.738826	0.751535	0.738826	0.751535	0.000872948	4.4	0	0.888	0.444
858	LG3(N4)	33		0.3	5	0.738854	0.751476	0.738854	0.751476	0.000873518	4.3	0	0.921	0.46
859	LG3(N4)	34		0.31	5	0.738888	0.751413	0.738888	0.751413	0.00087414	4.3	0	0.956	0.478
860	LG3(N4)	35		0.31	4	0.738926	0.751346	0.738926	0.751346	0.000874812	4.2	0	0.993	0.497
861	LG3(N4)	35.179	LmSSR18-2E	0.31	4	0.738933	0.751333	0.738933	0.751333	0.000874937	4.2	0	1	0.5
862	LG3(N4)	36.179		0.3	4	0.738844	0.75129	0.738844	0.75129	0.000874732	4.2	0	0.962	0.481
863	LG3(N4)	37.179		0.3	5	0.738783	0.751233	0.738783	0.751233	0.000874787	4.2	0	0.935	0.468
864	LG3(N4)	38.179		0.3	5	0.738751	0.751161	0.738751	0.751161	0.000875109	4.2	0	0.919	0.459
865	LG3(N4)	39.179		0.29	5	0.73875	0.751076	0.73875	0.751076	0.000875697	4.1	0	0.913	0.456
866	LG3(N4)	40.179		0.28	5	0.73878	0.750976	0.73878	0.750976	0.000876546	4	0	0.917	0.459
867	LG3(N4)	41.179		0.28	5	0.738841	0.750863	0.738841	0.750863	0.000877642	3.9	0	0.932	0.466
868	LG3(N4)	42.179		0.27	4	0.738933	0.750737	0.738933	0.750737	0.000878967	3.7	0	0.958	0.479
869	LG3(N4)	43.179		0.26	4	0.739053	0.750599	0.739053	0.750599	0.000880493	3.6	0	0.994	0.497
870	LG3(N4)	43.315	LmSSR15-8G	0.26	4	0.739071	0.750579	0.739071	0.750579	0.000880714	3.5	0	1	0.5
871	LG3(N4)	44.315		0.17	8	0.738844	0.750465	0.738844	0.750465	0.000880383	3.6	0	0.969	0.484
872	LG3(N4)	45.315		0.03	17	0.741013	0.748733	0.741013	0.748733	0.00089884	1.6	0	0.967	0.483
873	LG3(N4)	46.315		0.01	5	0.747569	0.744616	0.747569	0.744616	0.000911036	0.2	0	0.994	0.497
874	LG3(N4)	46.461	GAG-cgga	0.02	4	0.747833	0.744476	0.747833	0.744476	0.000910452	0.3	0	1	0.5
875	LG3(N4)	47.461		0.03	4	0.748447	0.744174	0.748447	0.744174	0.000908871	0.5	0	0.942	0.471
876	LG3(N4)	48.461		0.05	5	0.749096	0.743874	0.749096	0.743874	0.000906862	0.7	0	0.901	0.45
877	LG3(N4)	49.461		0.06	5	0.749762	0.743587	0.749762	0.743587	0.000904482	0.9	0	0.876	0.438
878	LG3(N4)	50.461		0.08	5	0.750422	0.743323	0.750422	0.743323	0.000901844	1.2	0	0.866	0.433
879	LG3(N4)	51.461		0.1	5	0.75106	0.743092	0.75106	0.743092	0.000899092	1.5	0	0.873	0.437
880	LG3(N4)	52.461		0.12	5	0.751661	0.742898	0.751661	0.742898	0.00089637	1.8	0	0.896	0.448
881	LG3(N4)	53.461		0.15	5	0.752218	0.742742	0.752218	0.742742	0.000893793	2.1	0	0.935	0.468
882	LG3(N4)	54.461		0.17	4	0.75273	0.742623	0.75273	0.742623	0.000891441	2.4	0	0.991	0.495
883	LG3(N4)	54.605	TTA-cgtg-150	0.17	4	0.7528	0.742609	0.7528	0.742609	0.000891124	2.4	0	1	0.5
884	LG3(N4)	55.605		0.18	4	0.752751	0.742396	0.752751	0.742396	0.000889773	2.6	0	0.936	0.468
885	LG3(N4)	56.605		0.18	5	0.752644	0.742227	0.752644	0.742227	0.000888955	2.6	0	0.907	0.454
886	LG3(N4)	57.605		0.19	5	0.752481	0.742111	0.752481	0.742111	0.00088873	2.7	0	0.912	0.456
887	LG3(N4)	58.605		0.19	4	0.752264	0.742052	0.752264	0.742052	0.000889124	2.6	0	0.952	0.476
888	LG3(N4)	59.299	LmSSRH15-9F-360*	0.19	4	0.752083	0.742048	0.752083	0.742048	0.000889754	2.6	0	1	0.5
889	LG3(N4)	60.299		0.25	4	0.752937	0.741225	0.752937	0.741225	0.00088068	3.5	0	0.953	0.477
890	LG3(N4)	61.202	GTA-ccaa-300	0.31	4	0.753462	0.74065	0.753462	0.74065	0.000873872	4.3	0	1	0.5
891	LG3(N4)	62.202		0.31	4	0.753372	0.740656	0.753372	0.740656	0.000874371	4.2	0	0.953	0.477
892	LG3(N4)	63.202		0.3	4	0.753245	0.740725	0.753245	0.740725	0.000875531	4.1	0	0.941	0.47
893	LG3(N4)	64.202		0.28	4	0.753075	0.74086	0.753075	0.74086	0.000877372	3.9	0	0.963	0.481
894	LG3(N4)	64.927	TAT-ccaa-210	0.27	4	0.752923	0.741	0.752923	0.741	0.000879119	3.7	0	1	0.5
895	LG3(N4)	65.927		0.32	4	0.753266	0.740406	0.753266	0.740406	0.000873009	4.4	0	0.976	0.488
896	LG3(N4)	66.831	GTA-cact-160	0.36	4	0.7535	0.739947	0.7535	0.739947	0.000868195	4.9	0	1	0.5
897	LG3(N4)	66.831	GAC-cccc-180	0.36	4	0.7535	0.739947	0.7535	0.739947	0.000868195	4.9	0	1	0.5
898	LG3(N4)	66.831	ATG-cgat80	0.36	4	0.7535	0.739947	0.7535	0.739947	0.000868195	4.9	0	1	0.5
899	LG3(N4)	66.831	LmSSRH14-4A	0.36	4	0.7535	0.739947	0.7535	0.739947	0.000868195	4.9	0	1	0.5
900	LG3(N4)	67.831		0.28	5	0.7529	0.740705	0.7529	0.740705	0.000877105	3.9	0	0.977	0.488
901	LG3(N4)	68.58	ATG-ctag-150	0.22	4	0.752231	0.74145	0.752231	0.74145	0.000885311	3	0	1	0.5
902	LG3(N4)	69.58		0.19	6	0.752136	0.741483	0.752136	0.741483	0.000885927	3	0	0.967	0.484
903	LG3(N4)	70.58		0.15	7	0.75193	0.74159	0.75193	0.74159	0.000887463	2.8	0	0.944	0.472
904	LG3(N4)	71.58		0.1	9	0.751507	0.74184	0.751507	0.74184	0.000890649	2.5	0	0.929	0.465
905	LG3(N4)	72.58		0.05	12	0.750535	0.742447	0.750535	0.742447	0.000897335	1.7	0	0.924	0.462
906	LG3(N4)	73.58		0.01	16	0.747602	0.744375	0.747602	0.744375	0.000910541	0.3	0	0.928	0.464
907	LG3(N4)	74.58		0	9	0.744555	0.746517	0.744555	0.746517	0.000912123	0.1	0	0.941	0.471
908	LG3(N4)	75.58		0.02	6	0.743405	0.747368	0.743405	0.747368	0.000909231	0.4	0	0.963	0.482
909	LG3(N4)	76.58		0.05	4	0.742841	0.747799	0.742841	0.747799	0.000907057	0.7	0	0.995	0.497
910	LG3(N4)	76.72	LmSSR7-3E	0.05	4	0.742786	0.747842	0.742786	0.747842	0.000906815	0.7	0	1	0.5
911	LG3(N4)	77.72		0.05	4	0.742633	0.747923	0.742633	0.747923	0.000906239	0.7	0	0.951	0.476
912	LG3(N4)	78.72		0.06	4	0.742484	0.747999	0.742484	0.747999	0.000905664	0.8	0	0.912	0.456
913	LG3(N4)	79.72		0.06	5	0.742342	0.74807	0.742342	0.74807	0.000905099	0.9	0	0.882	0.441
914	LG3(N4)	80.72		0.06	5	0.742207	0.748133	0.742207	0.748133	0.000904556	0.9	0	0.862	0.431
915	LG3(N4)	81.72		0.07	5	0.742081	0.74819	0.742081	0.74819	0.000904047	1	0	0.851	0.426
916	LG3(N4)	82.72		0.07	5	0.741968	0.748239	0.741968	0.748239	0.000903582	1	0	0.851	0.425
917	LG3(N4)	83.72		0.07	5	0.741868	0.748279	0.741868	0.748279	0.000903174	1.1	0	0.859	0.43
918	LG3(N4)	84.72		0.08	5	0.741782	0.74831	0.741782	0.74831	0.000902829	1.1	0	0.877	0.439
919	LG3(N4)	85.72		0.08	4	0.741712	0.748332	0.741712	0.748332	0.000902557	1.2	0	0.905	0.452
920	LG3(N4)	86.72		0.08	4	0.741658	0.748346	0.741658	0.748346	0.000902362	1.2	0	0.942	0.471
921	LG3(N4)	87.72		0.09	4	0.741621	0.74835	0.741621	0.74835	0.000902245	1.2	0	0.989	0.495
922	LG3(N4)	87.924	GTT-ctcg-340	0.09	4	0.741615	0.74835	0.741615	0.74835	0.000902231	1.2	0	1	0.5
923	LG3(N4)	88.924		0.08	4	0.741695	0.748327	0.741695	0.748327	0.000902534	1.2	0	0.946	0.473
924	LG3(N4)	89.924		0.08	4	0.741787	0.748298	0.741787	0.748298	0.000902889	1.1	0	0.905	0.453
925	LG3(N4)	90.924		0.08	4	0.74189	0.748262	0.74189	0.748262	0.000903293	1.1	0	0.879	0.439
926	LG3(N4)	91.924		0.07	4	0.742003	0.748221	0.742003	0.748221	0.000903737	1	0	0.866	0.433
927	LG3(N4)	92.924		0.07	4	0.742125	0.748173	0.742125	0.748173	0.000904215	1	0	0.868	0.434
928	LG3(N4)	93.924		0.06	4	0.742255	0.74812	0.742255	0.74812	0.000904718	0.9	0	0.883	0.442
929	LG3(N4)	94.924		0.06	4	0.74239	0.748062	0.74239	0.748062	0.000905239	0.9	0	0.913	0.456
930	LG3(N4)	95.924		0.06	4	0.742531	0.747999	0.742531	0.747999	0.00090577	0.8	0	0.956	0.478
931	LG3(N4)	96.706	TAT-ccaa-110	0.05	4	0.742643	0.747947	0.742643	0.747947	0.000906187	0.8	0	1	0.5
932	LG3(N4)	97.706		0.05	4	0.742581	0.747923	0.742581	0.747923	0.000906123	0.8	0	0.973	0.486
933	LG3(N4)	98.706		0.06	4	0.742517	0.747899	0.742517	0.747899	0.000906058	0.8	0	0.964	0.482
934	LG3(N4)	99.706		0.06	4	0.742451	0.747874	0.742451	0.747874	0.000905993	0.8	0	0.973	0.486
935	LG3(N4)	100.699	LmSSR15-7C-100	0.06	4	0.742385	0.74785	0.742385	0.74785	0.000905928	0.8	0	1	0.5
936	LG3(N4)	101.699		0.06	4	0.742384	0.74785	0.742384	0.74785	0.000905926	0.8	0	0.976	0.488
937	LG3(N4)	102.699		0.06	4	0.742385	0.74785	0.742385	0.74785	0.000905927	0.8	0	0.992	0.496
938	LG3(N4)	102.895	ATA-cggt250	0.06	4	0.742385	0.74785	0.742385	0.74785	0.000905928	0.8	0	1	0.5
939	LG3(N4)	103.895		0.06	4	0.742403	0.747867	0.742403	0.747867	0.00090591	0.8	0	0.956	0.478
940	LG3(N4)	104.895		0.06	4	0.742423	0.747883	0.742423	0.747883	0.000905904	0.8	0	0.923	0.461
941	LG3(N4)	105.895		0.06	4	0.742447	0.747897	0.742447	0.747897	0.00090591	0.8	0	0.901	0.45
942	LG3(N4)	106.895		0.06	4	0.742473	0.747909	0.742473	0.747909	0.000905927	0.8	0	0.89	0.445
943	LG3(N4)	107.895		0.06	4	0.742502	0.74792	0.742502	0.74792	0.000905957	0.8	0	0.889	0.445
944	LG3(N4)	108.895		0.06	4	0.742533	0.747929	0.742533	0.747929	0.000905997	0.8	0	0.9	0.45
945	LG3(N4)	109.895		0.05	4	0.742567	0.747937	0.742567	0.747937	0.000906049	0.8	0	0.922	0.461
946	LG3(N4)	110.895		0.05	4	0.742603	0.747943	0.742603	0.747943	0.000906111	0.8	0	0.954	0.477
947	LG3(N4)	111.895		0.05	4	0.742641	0.747947	0.742641	0.747947	0.000906183	0.8	0	0.998	0.499
948	LG3(N4)	111.943	ATT-cggt200	0.05	4	0.742643	0.747947	0.742643	0.747947	0.000906187	0.8	0	1	0.5
949	LG4(N4)	0	AAA-caca-200	0.01	4	0.746733	0.744833	0.746733	0.744833	0.000912165	0.1	0	1	0.5
950	LG4(N4)	1		0.01	4	0.746807	0.744779	0.746807	0.744779	0.00091204	0.1	0	0.967	0.483
951	LG4(N4)	2		0.01	4	0.746881	0.744725	0.746881	0.744725	0.000911908	0.1	0	0.938	0.469
952	LG4(N4)	3		0.01	4	0.746956	0.744672	0.746956	0.744672	0.00091177	0.1	0	0.914	0.457
953	LG4(N4)	4		0.01	4	0.747029	0.744621	0.747029	0.744621	0.000911626	0.2	0	0.895	0.447
954	LG4(N4)	5		0.01	5	0.747101	0.744571	0.747101	0.744571	0.00091148	0.2	0	0.88	0.44
955	LG4(N4)	6		0.01	5	0.747171	0.744525	0.747171	0.744525	0.000911332	0.2	0	0.87	0.435
956	LG4(N4)	7		0.01	5	0.747238	0.744481	0.747238	0.744481	0.000911186	0.2	0	0.864	0.432
957	LG4(N4)	8		0.01	5	0.747302	0.74444	0.747302	0.74444	0.000911043	0.2	0	0.863	0.432
958	LG4(N4)	9		0.02	5	0.747362	0.744403	0.747362	0.744403	0.000910906	0.2	0	0.867	0.433
959	LG4(N4)	10		0.02	5	0.747419	0.74437	0.747419	0.74437	0.000910776	0.3	0	0.875	0.437
960	LG4(N4)	11		0.02	5	0.74747	0.744341	0.74747	0.744341	0.000910656	0.3	0	0.888	0.444
961	LG4(N4)	12		0.02	4	0.747518	0.744317	0.747518	0.744317	0.000910546	0.3	0	0.905	0.453
962	LG4(N4)	13		0.02	4	0.74756	0.744296	0.74756	0.744296	0.000910449	0.3	0	0.927	0.464
963	LG4(N4)	14		0.02	4	0.747598	0.74428	0.747598	0.74428	0.000910365	0.3	0	0.954	0.477
964	LG4(N4)	15		0.02	4	0.74763	0.744267	0.74763	0.744267	0.000910295	0.3	0	0.985	0.493
965	LG4(N4)	15.428	AAA-caca-240	0.02	4	0.747643	0.744263	0.747643	0.744263	0.00091027	0.3	0	1	0.5
966	LG4(N4)	16.428		0.02	4	0.747643	0.744263	0.747643	0.744263	0.000910269	0.3	0	0.965	0.482
967	LG4(N4)	17.428		0.02	4	0.747643	0.744263	0.747643	0.744263	0.00091027	0.3	0	0.997	0.499
968	LG4(N4)	17.471	CaiSSRB02F09	0.02	4	0.747643	0.744263	0.747643	0.744263	0.00091027	0.3	0	1	0.5
969	LG4(N4)	18.471		0.02	4	0.747627	0.744209	0.747627	0.744209	0.000910189	0.3	0	0.967	0.484
970	LG4(N4)	19.471		0.02	4	0.747612	0.744154	0.747612	0.744154	0.000910106	0.3	0	0.971	0.486
971	LG4(N4)	20.237	LmSSR15-11G-180	0.02	4	0.7476	0.744111	0.7476	0.744111	0.000910042	0.3	0	1	0.5
972	LG4(N4)	21.237		0.05	4	0.748536	0.743446	0.748536	0.743446	0.000906668	0.7	0	0.967	0.484
973	LG4(N4)	22.237		0.08	4	0.749422	0.742873	0.749422	0.742873	0.000902539	1.2	0	0.972	0.486
974	LG4(N4)	22.985	TAG-cctg-170	0.11	4	0.75	0.742526	0.75	0.742526	0.000899416	1.5	0	1	0.5
975	LG4(N4)	23.985		0.11	4	0.75	0.742526	0.75	0.742526	0.000899415	1.5	0	0.981	0.49
976	LG4(N4)	24.384	GTC-cgct-210	0.11	4	0.75	0.742526	0.75	0.742526	0.000899416	1.5	0	1	0.5
977	LG4(N4)	25.384		0.11	4	0.75	0.742526	0.75	0.742526	0.000899413	1.5	0	0.977	0.488
978	LG4(N4)	26.384		0.11	4	0.75	0.742526	0.75	0.742526	0.000899415	1.5	0	0.988	0.494
979	LG4(N4)	26.722	ATA-cctt110	0.11	4	0.75	0.742526	0.75	0.742526	0.000899416	1.5	0	1	0.5
980	LG4(N4)	26.722	TTC-cccg-380	0.11	4	0.75	0.742526	0.75	0.742526	0.000899416	1.5	0	1	0.5
981	LG4(N4)	27.234	GTG-ccag-260	0.11	4	0.75	0.742526	0.75	0.742526	0.000899416	1.5	0	1	0.5
982	LG4(N4)	27.234	GTA-cggt-180	0.11	4	0.75	0.742526	0.75	0.742526	0.000899416	1.5	0	1	0.5
983	LG4(N4)	27.97	CaiSSRB08G02-170	0.11	4	0.75	0.742526	0.75	0.742526	0.000899416	1.5	0	1	0.5
984	LG4(N4)	28.97		0.11	4	0.75	0.742526	0.75	0.742526	0.000899414	1.5	0	0.965	0.482
985	LG4(N4)	29.844	ATG-cgat280	0.11	4	0.75	0.742526	0.75	0.742526	0.000899416	1.5	0	1	0.5
986	LG4(N4)	30.156	TAC-cagc-300	0.11	4	0.75	0.742526	0.75	0.742526	0.000899416	1.5	0	1	0.5
987	LG4(N4)	31.156		0.11	4	0.75	0.742526	0.75	0.742526	0.000899416	1.5	0	0.999	0.499
988	LG4(N4)	31.188	GAA-cgtg-460	0.11	4	0.75	0.742526	0.75	0.742526	0.000899416	1.5	0	1	0.5
989	LG4(N4)	32.188		0.12	4	0.750154	0.742272	0.750154	0.742272	0.000897795	1.7	0	0.958	0.479
990	LG4(N4)	33.188		0.13	5	0.750301	0.742009	0.750301	0.742009	0.000896078	1.9	0	0.92	0.46
991	LG4(N4)	34.188		0.14	5	0.750441	0.741737	0.750441	0.741737	0.000894275	2.1	0	0.887	0.443
992	LG4(N4)	35.188		0.15	5	0.750572	0.741458	0.750572	0.741458	0.000892398	2.3	0	0.859	0.429
993	LG4(N4)	36.188		0.16	5	0.750693	0.741174	0.750693	0.741174	0.000890461	2.5	0	0.835	0.417
994	LG4(N4)	37.188		0.18	6	0.750805	0.740885	0.750805	0.740885	0.000888481	2.7	0	0.816	0.408
995	LG4(N4)	38.188		0.19	6	0.750905	0.740593	0.750905	0.740593	0.000886477	2.9	0	0.801	0.4
996	LG4(N4)	39.188		0.2	6	0.750994	0.7403	0.750994	0.7403	0.000884472	3.1	0	0.791	0.395
997	LG4(N4)	40.188		0.21	6	0.751071	0.740008	0.751071	0.740008	0.000882488	3.3	0	0.785	0.392
998	LG4(N4)	41.188		0.23	6	0.751135	0.739719	0.751135	0.739719	0.00088055	3.6	0	0.784	0.392
999	LG4(N4)	42.188		0.24	6	0.751186	0.739434	0.751186	0.739434	0.000878685	3.8	0	0.787	0.393
1000	LG4(N4)	43.188		0.26	6	0.751223	0.739157	0.751223	0.739157	0.000876917	4	0	0.794	0.397
1001	LG4(N4)	44.188		0.27	6	0.751247	0.738888	0.751247	0.738888	0.000875272	4.1	0	0.806	0.403
1002	LG4(N4)	45.188		0.28	6	0.751256	0.73863	0.751256	0.73863	0.000873774	4.3	0	0.823	0.412
1003	LG4(N4)	46.188		0.3	6	0.751251	0.738385	0.751251	0.738385	0.000872445	4.4	0	0.844	0.422
1004	LG4(N4)	47.188		0.31	5	0.751232	0.738153	0.751232	0.738153	0.000871305	4.6	0	0.87	0.435
1005	LG4(N4)	48.188		0.32	5	0.751199	0.737938	0.751199	0.737938	0.000870369	4.7	0	0.9	0.45
1006	LG4(N4)	49.188		0.34	5	0.751152	0.737739	0.751152	0.737739	0.00086965	4.8	0	0.935	0.468
1007	LG4(N4)	50.188		0.35	5	0.751092	0.737559	0.751092	0.737559	0.000869157	4.8	0	0.975	0.487
1008	LG4(N4)	50.772	TCA-cgta	0.35	4	0.75105	0.737462	0.75105	0.737462	0.000868975	4.8	0	1	0.5
1009	LG4(N4)	50.848	TAG-ccac	0.35	4	0.75105	0.737462	0.75105	0.737462	0.000868975	4.8	0	1	0.5
1010	LG4(N4)	51.579	GGC-cttc	0.35	4	0.75105	0.737462	0.75105	0.737462	0.000868975	4.8	0	1	0.5
1011	LG4(N4)	52.515	ATA-ccat300	0.35	4	0.75105	0.737462	0.75105	0.737462	0.000868975	4.8	0	1	0.5
1012	LG4(N4)	53.515		0.34	4	0.750991	0.737648	0.750991	0.737648	0.00087045	4.7	0	0.949	0.474
1013	LG4(N4)	54.515		0.33	4	0.750925	0.737848	0.750925	0.737848	0.000872028	4.5	0	0.911	0.456
1014	LG4(N4)	55.515		0.31	5	0.750851	0.738061	0.750851	0.738061	0.000873704	4.3	0	0.888	0.444
1015	LG4(N4)	56.515		0.3	5	0.75077	0.738288	0.75077	0.738288	0.000875474	4.1	0	0.878	0.439
1016	LG4(N4)	57.515		0.28	5	0.750681	0.738528	0.750681	0.738528	0.000877329	3.9	0	0.882	0.441
1017	LG4(N4)	58.515		0.27	4	0.750584	0.73878	0.750584	0.73878	0.000879257	3.7	0	0.9	0.45
1018	LG4(N4)	59.515		0.25	4	0.750478	0.739042	0.750478	0.739042	0.000881243	3.5	0	0.932	0.466
1019	LG4(N4)	60.515		0.24	4	0.750365	0.739315	0.750365	0.739315	0.000883269	3.3	0	0.977	0.489
1020	LG4(N4)	60.925	AAG-cacg-340	0.23	4	0.750316	0.739429	0.750316	0.739429	0.000884107	3.2	0	1	0.5
1021	LG4(N4)	61.925		0.19	4	0.749908	0.739827	0.749908	0.739827	0.000888345	2.7	0	0.952	0.476
1022	LG4(N4)	62.925		0.15	5	0.749412	0.740342	0.749412	0.740342	0.000893166	2.2	0	0.942	0.471
1023	LG4(N4)	63.925		0.11	4	0.748837	0.740984	0.748837	0.740984	0.00089826	1.6	0	0.969	0.485
1024	LG4(N4)	64.473	LmSSR16-3F-110	0.1	4	0.7485	0.741385	0.7485	0.741385	0.000900972	1.3	0	1	0.5
1025	LG4(N4)	65.473		0.1	4	0.748501	0.741384	0.748501	0.741384	0.000900967	1.3	0	0.978	0.489
1026	LG4(N4)	66.473		0.1	4	0.748501	0.741384	0.748501	0.741384	0.000900967	1.3	0	0.979	0.49
1027	LG4(N4)	67.404	LmSSR18-2B-390*	0.1	4	0.7485	0.741385	0.7485	0.741385	0.000900972	1.3	0	1	0.5
1028	LG4(N4)	68.404		0.11	4	0.748683	0.740891	0.748683	0.740891	0.000898708	1.6	0	0.979	0.489
1029	LG4(N4)	69.404		0.13	4	0.748847	0.740408	0.748847	0.740408	0.000896397	1.8	0	0.978	0.489
1030	LG4(N4)	70.404		0.15	4	0.748991	0.739946	0.748991	0.739946	0.000894113	2.1	0	0.998	0.499
1031	LG4(N4)	70.469	ATA-ctaa-300	0.15	4	0.749	0.739917	0.749	0.739917	0.000893967	2.1	0	1	0.5
1032	LG4(N4)	71.469		0.15	4	0.749017	0.739874	0.749017	0.739874	0.000893727	2.1	0	0.967	0.484
1033	LG4(N4)	72.469		0.15	4	0.74903	0.739839	0.74903	0.739839	0.000893535	2.1	0	0.941	0.47
1034	LG4(N4)	73.469		0.15	4	0.74904	0.739814	0.74904	0.739814	0.000893394	2.2	0	0.92	0.46
1035	LG4(N4)	74.469		0.15	5	0.749045	0.739797	0.749045	0.739797	0.000893306	2.2	0	0.906	0.453
1036	LG4(N4)	75.469		0.15	5	0.749047	0.73979	0.749047	0.73979	0.000893272	2.2	0	0.897	0.448
1037	LG4(N4)	76.469		0.15	5	0.749045	0.739793	0.749045	0.739793	0.000893293	2.2	0	0.894	0.447
1038	LG4(N4)	77.469		0.15	5	0.749039	0.739805	0.749039	0.739805	0.00089337	2.2	0	0.897	0.449
1039	LG4(N4)	78.469		0.15	5	0.749029	0.739827	0.749029	0.739827	0.0008935	2.1	0	0.906	0.453
1040	LG4(N4)	79.469		0.15	4	0.749015	0.739858	0.749015	0.739858	0.000893684	2.1	0	0.921	0.461
1041	LG4(N4)	80.469		0.15	4	0.748997	0.739897	0.748997	0.739897	0.000893919	2.1	0	0.942	0.471
1042	LG4(N4)	81.469		0.15	4	0.748976	0.739946	0.748976	0.739946	0.000894203	2.1	0	0.969	0.485
1043	LG4(N4)	82.415	AAC-ccgt250	0.15	4	0.748952	0.74	0.748952	0.74	0.000894514	2	0	1	0.5
1044	LG4(N4)	83.415		0.16	4	0.749227	0.739736	0.749227	0.739736	0.000892014	2.3	0	0.963	0.482
1045	LG4(N4)	84.415		0.18	5	0.749494	0.739501	0.749494	0.739501	0.000889535	2.6	0	0.937	0.468
1046	LG4(N4)	85.415		0.2	5	0.749748	0.739297	0.749748	0.739297	0.000887129	2.8	0	0.92	0.46
1047	LG4(N4)	86.415		0.22	5	0.749989	0.739122	0.749989	0.739122	0.000884837	3.1	0	0.912	0.456
1048	LG4(N4)	87.415		0.23	5	0.750215	0.738975	0.750215	0.738975	0.000882687	3.3	0	0.915	0.457
1049	LG4(N4)	88.415		0.25	5	0.750426	0.738853	0.750426	0.738853	0.000880696	3.5	0	0.927	0.463
1050	LG4(N4)	89.415		0.27	4	0.750622	0.738755	0.750622	0.738755	0.000878869	3.7	0	0.948	0.474
1051	LG4(N4)	90.415		0.29	4	0.750804	0.738677	0.750804	0.738677	0.000877206	3.9	0	0.98	0.49
1052	LG4(N4)	90.942	GAT-cggt-160	0.29	4	0.750895	0.738643	0.750895	0.738643	0.000876394	4	0	1	0.5
1053	LG4(N4)	91.942		0.29	4	0.750895	0.738642	0.750895	0.738642	0.000876387	4	0	0.966	0.483
1054	LG4(N4)	92.942		0.29	4	0.750895	0.738643	0.750895	0.738643	0.000876389	4	0	0.975	0.487
1055	LG4(N4)	93.548	AAA-caca-120	0.29	4	0.750895	0.738643	0.750895	0.738643	0.000876394	4	0	1	0.5
1056	LG4(N4)	94.548		0.3	4	0.750955	0.738627	0.750955	0.738627	0.000875888	4.1	0	0.961	0.481
1057	LG4(N4)	95.548		0.3	4	0.751013	0.738616	0.751013	0.738616	0.000875416	4.1	0	0.93	0.465
1058	LG4(N4)	96.548		0.3	4	0.751072	0.738611	0.751072	0.738611	0.000874978	4.2	0	0.908	0.454
1059	LG4(N4)	97.548		0.31	4	0.751129	0.738611	0.751129	0.738611	0.000874572	4.2	0	0.893	0.446
1060	LG4(N4)	98.548		0.31	4	0.751185	0.738616	0.751185	0.738616	0.0008742	4.3	0	0.886	0.443
1061	LG4(N4)	99.548		0.31	4	0.751241	0.738626	0.751241	0.738626	0.000873859	4.3	0	0.886	0.443
1062	LG4(N4)	100.548		0.31	4	0.751296	0.738641	0.751296	0.738641	0.000873551	4.3	0	0.895	0.448
1063	LG4(N4)	101.548		0.32	4	0.751351	0.73866	0.751351	0.73866	0.000873272	4.4	0	0.912	0.456
1064	LG4(N4)	102.548		0.32	4	0.751405	0.738683	0.751405	0.738683	0.000873024	4.4	0	0.936	0.468
1065	LG4(N4)	103.548		0.32	4	0.751458	0.73871	0.751458	0.73871	0.000872804	4.4	0	0.969	0.484
1066	LG4(N4)	104.336	LmSSR16-3F-120	0.32	4	0.7515	0.738733	0.7515	0.738733	0.000872649	4.4	0	1	0.5
1067	LG4(N4)	105.336		0.35	4	0.751742	0.738439	0.751742	0.738439	0.000869185	4.8	0	0.963	0.481
1068	LG4(N4)	106.336		0.37	5	0.751966	0.738165	0.751966	0.738165	0.000865838	5.2	0	0.936	0.468
1069	LG4(N4)	107.336		0.4	5	0.752171	0.737912	0.752171	0.737912	0.000862663	5.5	0	0.919	0.46
1070	LG4(N4)	108.336		0.42	5	0.752356	0.737684	0.752356	0.737684	0.000859702	5.8	0	0.912	0.456
1071	LG4(N4)	109.336		0.44	5	0.752521	0.737481	0.752521	0.737481	0.000856992	6.1	0	0.916	0.458
1072	LG4(N4)	110.336		0.46	5	0.752668	0.737305	0.752668	0.737305	0.000854555	6.4	0	0.929	0.465
1073	LG4(N4)	111.336		0.49	5	0.752798	0.737155	0.752798	0.737155	0.000852409	6.6	0	0.953	0.476
1074	LG4(N4)	112.336		0.51	4	0.752911	0.737034	0.752911	0.737034	0.000850563	6.8	0	0.987	0.493
1075	LG4(N4)	112.661	ATC-cgct300	0.51	4	0.752944	0.737	0.752944	0.737	0.000850029	6.9	0	1	0.5
1076	LG5(N4)	0	AGT-cgat280	0.28	4	0.754091	0.7415	0.754091	0.7415	0.000877831	3.9	0	1	0.5
1077	LG5(N4)	1		0.3	5	0.754421	0.741243	0.754421	0.741243	0.000874205	4.3	0	0.969	0.484
1078	LG5(N4)	2		0.33	5	0.754648	0.74102	0.754648	0.74102	0.000871193	4.6	0	0.953	0.477
1079	LG5(N4)	3		0.34	5	0.754764	0.740832	0.754764	0.740832	0.000868953	4.8	0	0.953	0.477
1080	LG5(N4)	4		0.36	5	0.754768	0.740682	0.754768	0.740682	0.000867575	5	0	0.969	0.485
1081	LG5(N4)	4.979	TAT-cagt-100	0.37	4	0.754667	0.740571	0.754667	0.740571	0.000867085	5	0	1	0.5
1082	LG5(N4)	5.979		0.37	4	0.754529	0.740464	0.754529	0.740464	0.000866841	5.1	0	0.961	0.481
1083	LG5(N4)	6.979		0.37	5	0.754394	0.740359	0.754394	0.740359	0.000866633	5.1	0	0.927	0.463
1084	LG5(N4)	7.979		0.36	5	0.754261	0.740255	0.754261	0.740255	0.00086646	5.1	0	0.896	0.448
1085	LG5(N4)	8.979		0.36	5	0.754129	0.740154	0.754129	0.740154	0.000866324	5.1	0	0.87	0.435
1086	LG5(N4)	9.979		0.36	5	0.753999	0.740056	0.753999	0.740056	0.000866225	5.1	0	0.847	0.423
1087	LG5(N4)	10.979		0.36	5	0.75387	0.73996	0.75387	0.73996	0.000866165	5.1	0	0.828	0.414
1088	LG5(N4)	11.979		0.36	5	0.753743	0.739866	0.753743	0.739866	0.000866145	5.1	0	0.813	0.407
1089	LG5(N4)	12.979		0.36	5	0.753616	0.739776	0.753616	0.739776	0.000866166	5.1	0	0.802	0.401
1090	LG5(N4)	13.979		0.36	5	0.753491	0.739688	0.753491	0.739688	0.00086623	5.1	0	0.795	0.397
1091	LG5(N4)	14.979		0.35	5	0.753366	0.739604	0.753366	0.739604	0.000866338	5.1	0	0.791	0.395
1092	LG5(N4)	15.979		0.35	5	0.753241	0.739524	0.753241	0.739524	0.000866493	5.1	0	0.791	0.396
1093	LG5(N4)	16.979		0.35	5	0.753117	0.739448	0.753117	0.739448	0.000866695	5.1	0	0.795	0.398
1094	LG5(N4)	17.979		0.35	5	0.752993	0.739376	0.752993	0.739376	0.000866946	5.1	0	0.803	0.401
1095	LG5(N4)	18.979		0.35	5	0.752868	0.739309	0.752868	0.739309	0.000867249	5	0	0.814	0.407
1096	LG5(N4)	19.979		0.35	5	0.752744	0.739247	0.752744	0.739247	0.000867605	5	0	0.83	0.415
1097	LG5(N4)	20.979		0.35	5	0.75262	0.73919	0.75262	0.73919	0.000868015	4.9	0	0.849	0.425
1098	LG5(N4)	21.979		0.35	5	0.752494	0.739139	0.752494	0.739139	0.000868481	4.9	0	0.872	0.436
1099	LG5(N4)	22.979		0.34	5	0.752369	0.739094	0.752369	0.739094	0.000869005	4.8	0	0.899	0.45
1100	LG5(N4)	23.979		0.34	5	0.752242	0.739055	0.752242	0.739055	0.000869586	4.8	0	0.93	0.465
1101	LG5(N4)	24.979		0.34	4	0.752115	0.739023	0.752115	0.739023	0.000870226	4.7	0	0.965	0.483
1102	LG5(N4)	25.875	AAT-cgct150	0.34	4	0.752	0.739	0.752	0.739	0.000870848	4.6	0	1	0.5
1103	LG5(N4)	26.875		0.38	5	0.752255	0.738291	0.752255	0.738291	0.000864493	5.3	0	0.96	0.48
1104	LG5(N4)	27.875		0.43	5	0.752456	0.737624	0.752456	0.737624	0.000858495	6	0	0.941	0.471
1105	LG5(N4)	28.875		0.48	5	0.75261	0.737012	0.75261	0.737012	0.000853023	6.6	0	0.944	0.472
1106	LG5(N4)	29.875		0.52	5	0.752724	0.736459	0.752724	0.736459	0.000848146	7.1	0	0.967	0.484
1107	LG5(N4)	30.646	ATT-ccat300	0.56	4	0.752789	0.736071	0.752789	0.736071	0.00084479	7.5	0	1	0.5
1108	LG5(N4)	31.25	GAC-cagt-100	0.56	4	0.752789	0.736071	0.752789	0.736071	0.00084479	7.5	0	1	0.5
1109	LG5(N4)	32.03	CaiSSRB03C04-190	0.56	4	0.752789	0.736071	0.752789	0.736071	0.00084479	7.5	0	1	0.5
1110	LG5(N4)	32.699	LmSSRT132E-100*	0.56	4	0.752789	0.736071	0.752789	0.736071	0.00084479	7.5	0	1	0.5
1111	LG5(N4)	32.699	CaiSSRB03C04-170	0.56	4	0.752789	0.736071	0.752789	0.736071	0.00084479	7.5	0	1	0.5
1112	LG5(N4)	33.699		0.67	4	0.753054	0.734602	0.753054	0.734602	0.000831435	8.9	0	0.992	0.496
1113	LG5(N4)	33.959	ATT-ctat-200	0.69	4	0.7531	0.734308	0.7531	0.734308	0.000828745	9.2	0	1	0.5
1114	LG5(N4)	33.959	TTG-ccgg	0.69	4	0.7531	0.734308	0.7531	0.734308	0.000828745	9.2	0	1	0.5
1115	LG5(N4)	34.959		0.59	7	0.753222	0.733337	0.753222	0.733337	0.000820053	10.2	0	0.967	0.483
1116	LG5(N4)	35.959		0.31	11	0.752858	0.733298	0.752858	0.733298	0.000824268	9.7	0	0.973	0.486
1117	LG5(N4)	36.656	LmSSR16-4F-260	0.02	4	0.746773	0.743545	0.746773	0.743545	0.000910745	0.3	0	1	0.5
1118	LG5(N4)	37.656		0.47	11	0.753716	0.729687	0.753716	0.729687	0.000784668	14.1	0	0.934	0.467
1119	LG5(N4)	38.656		0.93	8	0.75428	0.726814	0.75428	0.726814	0.000750988	17.8	0	0.906	0.453
1120	LG5(N4)	39.656		1.24	7	0.754442	0.725414	0.754442	0.725414	0.000735677	19.4	0	0.916	0.458
1121	LG5(N4)	40.656		1.45	6	0.754441	0.725298	0.754441	0.725298	0.000734679	19.5	0	0.964	0.482
1122	LG5(N4)	41.138	ATC-caac-250	1.51	4	0.754391	0.7257	0.754391	0.7257	0.000739199	19	0	1	0.5
1123	LG5(N4)	42.138		1.3	5	0.754225	0.727588	0.754225	0.727588	0.000758629	16.9	0	0.991	0.495
1124	LG5(N4)	42.518	GTA-cggt-100	1.2	4	0.754091	0.728909	0.754091	0.728909	0.000772143	15.4	0	1	0.5
1125	LG5(N4)	43.518		1.14	5	0.754083	0.728926	0.754083	0.728926	0.000772412	15.4	0	0.968	0.484
1126	LG5(N4)	44.518		1.08	5	0.754072	0.728949	0.754072	0.728949	0.000772801	15.4	0	0.944	0.472
1127	LG5(N4)	45.518		1.01	6	0.754054	0.728982	0.754054	0.728982	0.000773376	15.3	0	0.93	0.465
1128	LG5(N4)	46.518		0.92	6	0.754025	0.729031	0.754025	0.729031	0.000774263	15.2	0	0.924	0.462
1129	LG5(N4)	47.518		0.8	7	0.753976	0.729113	0.753976	0.729113	0.000775762	15	0	0.927	0.464
1130	LG5(N4)	48.518		0.65	8	0.753876	0.729279	0.753876	0.729279	0.000778781	14.7	0	0.939	0.47
1131	LG5(N4)	49.518		0.42	11	0.753563	0.729806	0.753563	0.729806	0.000788071	13.7	0	0.96	0.48
1132	LG5(N4)	50.518		0.09	7	0.74821	0.740009	0.74821	0.740009	0.000898767	1.6	0	0.99	0.495
1133	LG5(N4)	50.788	TTG-cgta-170	0.06	4	0.747522	0.7415	0.747522	0.7415	0.000905401	0.8	0	1	0.5
1134	LG5(N4)	51.788		0.06	4	0.747525	0.741495	0.747525	0.741495	0.00090538	0.8	0	0.973	0.486
1135	LG5(N4)	52.788		0.06	4	0.747526	0.741494	0.747526	0.741494	0.000905373	0.8	0	0.964	0.482
1136	LG5(N4)	53.788		0.06	4	0.747525	0.741495	0.747525	0.741495	0.000905379	0.8	0	0.972	0.486
1137	LG5(N4)	54.788		0.06	4	0.747522	0.7415	0.747522	0.7415	0.000905399	0.8	0	0.997	0.499
1138	LG5(N4)	54.87	GAA-ctaa-150	0.06	4	0.747522	0.7415	0.747522	0.7415	0.000905401	0.8	0	1	0.5
1139	LG5(N4)	55.87		0.04	4	0.747254	0.74237	0.747254	0.74237	0.00090788	0.6	0	0.97	0.485
1140	LG5(N4)	56.87		0.02	4	0.74694	0.743231	0.74694	0.743231	0.000909993	0.3	0	0.95	0.475
1141	LG5(N4)	57.87		0.01	4	0.746588	0.744058	0.746588	0.744058	0.0009116	0.2	0	0.939	0.469
1142	LG5(N4)	58.87		0	4	0.746204	0.744832	0.746204	0.744832	0.000912621	0	0	0.938	0.469
1143	LG5(N4)	59.87		0	3	0.745798	0.745537	0.745798	0.745537	0.000913043	0	0	0.946	0.473
1144	LG5(N4)	60.87		0	4	0.74538	0.746166	0.74538	0.746166	0.000912911	0	0	0.963	0.482
1145	LG5(N4)	61.87		0.01	4	0.744958	0.746718	0.744958	0.746718	0.000912305	0.1	0	0.991	0.495
1146	LG5(N4)	62.146	TTT-cgtc-200	0.01	4	0.744842	0.746857	0.744842	0.746857	0.000912068	0.1	0	1	0.5
1147	LG5(N4)	63.146		0.01	4	0.744786	0.746931	0.744786	0.746931	0.000911936	0.1	0	0.961	0.481
1148	LG5(N4)	64.146		0.01	4	0.74473	0.747004	0.74473	0.747004	0.000911796	0.1	0	0.928	0.464
1149	LG5(N4)	65.146		0.01	4	0.744675	0.747077	0.744675	0.747077	0.000911649	0.2	0	0.9	0.45
1150	LG5(N4)	66.146		0.01	4	0.74462	0.74715	0.74462	0.74715	0.000911495	0.2	0	0.878	0.439
1151	LG5(N4)	67.146		0.01	4	0.744565	0.747221	0.744565	0.747221	0.000911335	0.2	0	0.861	0.43
1152	LG5(N4)	68.146		0.01	4	0.744512	0.747291	0.744512	0.747291	0.000911172	0.2	0	0.848	0.424
1153	LG5(N4)	69.146		0.02	4	0.744461	0.747359	0.744461	0.747359	0.000911005	0.2	0	0.841	0.421
1154	LG5(N4)	70.146		0.02	4	0.744411	0.747426	0.744411	0.747426	0.000910836	0.2	0	0.84	0.42
1155	LG5(N4)	71.146		0.02	4	0.744363	0.747491	0.744363	0.747491	0.000910666	0.3	0	0.843	0.422
1156	LG5(N4)	72.146		0.02	4	0.744317	0.747553	0.744317	0.747553	0.000910498	0.3	0	0.852	0.426
1157	LG5(N4)	73.146		0.02	4	0.744273	0.747613	0.744273	0.747613	0.000910332	0.3	0	0.865	0.433
1158	LG5(N4)	74.146		0.02	4	0.744232	0.74767	0.744232	0.74767	0.000910169	0.3	0	0.884	0.442
1159	LG5(N4)	75.146		0.02	4	0.744194	0.747725	0.744194	0.747725	0.000910012	0.3	0	0.909	0.454
1160	LG5(N4)	76.146		0.02	4	0.744158	0.747776	0.744158	0.747776	0.00090986	0.4	0	0.938	0.469
1161	LG5(N4)	77.146		0.03	4	0.744126	0.747825	0.744126	0.747825	0.000909716	0.4	0	0.973	0.486
1162	LG5(N4)	77.838	GTG-cgat	0.03	4	0.744105	0.747857	0.744105	0.747857	0.000909621	0.4	0	1	0.5
1163	LG6(N4)	0	TCT-catt-190	0.23	4	0.740778	0.7516	0.740778	0.7516	0.000884022	3.2	0	0.996	0.498
1164	LG6(N4)	1		0.22	5	0.740882	0.751523	0.740882	0.751523	0.000885004	3.1	0	0.956	0.478
1165	LG6(N4)	2		0.2	5	0.741018	0.751412	0.741018	0.751412	0.000886318	2.9	0	0.925	0.462
1166	LG6(N4)	3		0.19	5	0.741187	0.751266	0.741187	0.751266	0.000887942	2.8	0	0.902	0.451
1167	LG6(N4)	4		0.17	5	0.741386	0.751083	0.741386	0.751083	0.000889841	2.5	0	0.889	0.444
1168	LG6(N4)	5		0.15	5	0.741613	0.750863	0.741613	0.750863	0.000891964	2.3	0	0.884	0.442
1169	LG6(N4)	6		0.14	5	0.741866	0.750607	0.741866	0.750607	0.000894246	2.1	0	0.889	0.444
1170	LG6(N4)	7		0.12	5	0.742139	0.75032	0.742139	0.75032	0.000896609	1.8	0	0.902	0.451
1171	LG6(N4)	8		0.11	5	0.742427	0.750005	0.742427	0.750005	0.00089897	1.5	0	0.924	0.462
1172	LG6(N4)	9		0.09	4	0.742724	0.749669	0.742724	0.749669	0.000901248	1.3	0	0.955	0.478
1173	LG6(N4)	10		0.08	4	0.743023	0.74932	0.743023	0.74932	0.000903372	1.1	0	0.996	0.498
1174	LG6(N4)	10.098	CaiSSRD09J21-150	0.07	4	0.743053	0.749286	0.743053	0.749286	0.00090357	1	0	1	0.5
1175	LG6(N4)	11.098		0.07	4	0.743051	0.749276	0.743051	0.749276	0.000903592	1	0	0.96	0.48
1176	LG6(N4)	12.098		0.07	4	0.743052	0.749264	0.743052	0.749264	0.000903626	1	0	0.923	0.462
1177	LG6(N4)	13.098		0.07	4	0.743055	0.74925	0.743055	0.74925	0.000903672	1	0	0.889	0.445
1178	LG6(N4)	14.098		0.07	4	0.74306	0.749234	0.74306	0.749234	0.00090373	1	0	0.859	0.43
1179	LG6(N4)	15.098		0.07	5	0.743067	0.749217	0.743067	0.749217	0.0009038	1	0	0.832	0.416
1180	LG6(N4)	16.098		0.07	5	0.743076	0.749198	0.743076	0.749198	0.000903883	1	0	0.808	0.404
1181	LG6(N4)	17.098		0.07	5	0.743087	0.749177	0.743087	0.749177	0.000903977	1	0	0.787	0.394
1182	LG6(N4)	18.098		0.07	5	0.7431	0.749154	0.7431	0.749154	0.000904082	1	0	0.769	0.385
1183	LG6(N4)	19.098		0.06	5	0.743116	0.74913	0.743116	0.74913	0.000904199	1	0	0.755	0.377
1184	LG6(N4)	20.098		0.06	5	0.743133	0.749103	0.743133	0.749103	0.000904326	1	0	0.743	0.371
1185	LG6(N4)	21.098		0.06	5	0.743153	0.749075	0.743153	0.749075	0.000904465	0.9	0	0.734	0.367
1186	LG6(N4)	22.098		0.06	5	0.743174	0.749045	0.743174	0.749045	0.000904613	0.9	0	0.729	0.364
1187	LG6(N4)	23.098		0.06	5	0.743198	0.749013	0.743198	0.749013	0.00090477	0.9	0	0.726	0.363
1188	LG6(N4)	24.098		0.06	5	0.743223	0.74898	0.743223	0.74898	0.000904937	0.9	0	0.726	0.363
1189	LG6(N4)	25.098		0.06	5	0.74325	0.748945	0.74325	0.748945	0.000905112	0.9	0	0.729	0.365
1190	LG6(N4)	26.098		0.06	5	0.743279	0.748909	0.743279	0.748909	0.000905295	0.9	0	0.735	0.368
1191	LG6(N4)	27.098		0.06	5	0.74331	0.748871	0.74331	0.748871	0.000905484	0.8	0	0.745	0.372
1192	LG6(N4)	28.098		0.05	5	0.743342	0.748831	0.743342	0.748831	0.00090568	0.8	0	0.757	0.378
1193	LG6(N4)	29.098		0.05	5	0.743376	0.74879	0.743376	0.74879	0.000905882	0.8	0	0.772	0.386
1194	LG6(N4)	30.098		0.05	5	0.743412	0.748748	0.743412	0.748748	0.000906088	0.8	0	0.79	0.395
1195	LG6(N4)	31.098		0.05	5	0.743448	0.748704	0.743448	0.748704	0.000906297	0.7	0	0.811	0.406
1196	LG6(N4)	32.098		0.05	5	0.743486	0.748659	0.743486	0.748659	0.00090651	0.7	0	0.836	0.418
1197	LG6(N4)	33.098		0.05	4	0.743525	0.748614	0.743525	0.748614	0.000906726	0.7	0	0.863	0.432
1198	LG6(N4)	34.098		0.05	4	0.743565	0.748567	0.743565	0.748567	0.000906942	0.7	0	0.894	0.447
1199	LG6(N4)	35.098		0.05	4	0.743606	0.748519	0.743606	0.748519	0.00090716	0.6	0	0.928	0.464
1200	LG6(N4)	36.098		0.04	4	0.743648	0.74847	0.743648	0.74847	0.000907377	0.6	0	0.966	0.483
1201	LG6(N4)	36.951	LmSSRH3-4F	0.04	4	0.743684	0.748429	0.743684	0.748429	0.000907562	0.6	0	1	0.5
1202	LG6(N4)	37.951		0.04	4	0.743684	0.748429	0.743684	0.748429	0.000907561	0.6	0	0.991	0.495
1203	LG6(N4)	38.302	CaiSSRB01D08-140	0.04	4	0.743684	0.748429	0.743684	0.748429	0.000907562	0.6	0	1	0.5
1204	LG6(N4)	39.169	GAC-ctac-160	0.11	4	0.742222	0.749867	0.742222	0.749867	0.000898571	1.6	0	1	0.5
1205	LG6(N4)	40.169		0.07	5	0.74301	0.749134	0.74301	0.749134	0.000903826	1	0	0.959	0.479
1206	LG6(N4)	41.169		0.03	4	0.743913	0.748172	0.743913	0.748172	0.000908645	0.5	0	0.956	0.478
1207	LG6(N4)	42.169		0.01	4	0.74481	0.747042	0.74481	0.747042	0.000911866	0.1	0	0.991	0.495
1208	LG6(N4)	42.336	CaiSSRA03M16-160	0.01	4	0.74495	0.746846	0.74495	0.746846	0.000912201	0.1	0	1	0.5
1209	LG6(N4)	43.336		0	5	0.745221	0.746438	0.745221	0.746438	0.000912708	0	0	0.959	0.479
1210	LG6(N4)	44.336		0	5	0.745601	0.745847	0.745601	0.745847	0.000913045	0	0	0.923	0.461
1211	LG6(N4)	45.336		0	8	0.746182	0.744925	0.746182	0.744925	0.000912685	0	0	0.891	0.445
1212	LG6(N4)	46.336		0.01	15	0.747249	0.743222	0.747249	0.743222	0.000909218	0.4	0	0.864	0.432
1213	LG6(N4)	47.336		0.04	24	0.749335	0.739943	0.749335	0.739943	0.000892128	2.3	0	0.842	0.421
1214	LG6(N4)	48.336		0.08	17	0.750587	0.737921	0.750587	0.737921	0.000875035	4.2	0	0.824	0.412
1215	LG6(N4)	49.336		0.13	14	0.751103	0.736969	0.751103	0.736969	0.000865874	5.2	0	0.81	0.405
1216	LG6(N4)	50.336		0.18	12	0.751362	0.736388	0.751362	0.736388	0.000860321	5.8	0	0.802	0.401
1217	LG6(N4)	51.336		0.22	10	0.751499	0.735985	0.751499	0.735985	0.000856714	6.2	0	0.797	0.399
1218	LG6(N4)	52.336		0.25	9	0.751564	0.735688	0.751564	0.735688	0.000854336	6.4	0	0.797	0.399
1219	LG6(N4)	53.336		0.29	9	0.751583	0.735465	0.751583	0.735465	0.000852831	6.6	0	0.802	0.401
1220	LG6(N4)	54.336		0.32	8	0.751568	0.735299	0.751568	0.735299	0.000852007	6.7	0	0.811	0.406
1221	LG6(N4)	55.336		0.34	8	0.751528	0.735179	0.751528	0.735179	0.000851729	6.7	0	0.825	0.412
1222	LG6(N4)	56.336		0.37	7	0.751467	0.735099	0.751467	0.735099	0.000851915	6.7	0	0.843	0.421
1223	LG6(N4)	57.336		0.39	7	0.751388	0.735056	0.751388	0.735056	0.0008525	6.6	0	0.866	0.433
1224	LG6(N4)	58.336		0.41	6	0.751295	0.735045	0.751295	0.735045	0.000853434	6.5	0	0.893	0.447
1225	LG6(N4)	59.336		0.42	6	0.751189	0.735065	0.751189	0.735065	0.000854673	6.4	0	0.925	0.463
1226	LG6(N4)	60.336		0.44	5	0.751072	0.735114	0.751072	0.735114	0.000856176	6.2	0	0.962	0.481
1227	LG6(N4)	61.265	GTC-cgcc-190	0.45	4	0.750955	0.735182	0.750955	0.735182	0.000857775	6.1	0	1	0.5
1228	LG6(N4)	61.841	GCG-cgcc	0.45	4	0.750955	0.735182	0.750955	0.735182	0.000857775	6.1	0	1	0.5
1229	LG6(N4)	62.841		0.42	5	0.751025	0.735572	0.751025	0.735572	0.000859113	5.9	0	0.962	0.481
1230	LG6(N4)	63.841		0.4	5	0.751055	0.736005	0.751055	0.736005	0.000861125	5.7	0	0.932	0.466
1231	LG6(N4)	64.841		0.37	5	0.751046	0.736476	0.751046	0.736476	0.000863733	5.4	0	0.909	0.455
1232	LG6(N4)	65.841		0.34	6	0.750998	0.736979	0.750998	0.736979	0.000866843	5.1	0	0.894	0.447
1233	LG6(N4)	66.841		0.31	6	0.750912	0.737508	0.750912	0.737508	0.000870354	4.7	0	0.886	0.443
1234	LG6(N4)	67.841		0.28	6	0.750789	0.738056	0.750789	0.738056	0.000874153	4.3	0	0.885	0.442
1235	LG6(N4)	68.841		0.25	5	0.75063	0.738616	0.75063	0.738616	0.000878124	3.8	0	0.891	0.446
1236	LG6(N4)	69.841		0.23	5	0.75044	0.73918	0.75044	0.73918	0.000882149	3.4	0	0.905	0.453
1237	LG6(N4)	70.841		0.2	5	0.750222	0.739742	0.750222	0.739742	0.000886115	3	0	0.927	0.463
1238	LG6(N4)	71.841		0.18	5	0.74998	0.740294	0.74998	0.740294	0.000889917	2.5	0	0.956	0.478
1239	LG6(N4)	72.841		0.15	4	0.74972	0.740828	0.74972	0.740828	0.000893471	2.1	0	0.992	0.496
1240	LG6(N4)	73.042	ATC-cggt140	0.15	4	0.749667	0.740933	0.749667	0.740933	0.000894149	2.1	0	1	0.5
1241	LG6(N4)	74.042		0.13	4	0.749509	0.741425	0.749509	0.741425	0.000896775	1.8	0	0.969	0.484
1242	LG6(N4)	75.042		0.11	4	0.749331	0.741905	0.749331	0.741905	0.000899279	1.5	0	0.953	0.477
1243	LG6(N4)	76.042		0.09	4	0.749131	0.742368	0.749131	0.742368	0.000901626	1.3	0	0.953	0.477
1244	LG6(N4)	77.042		0.07	4	0.748909	0.74281	0.748909	0.74281	0.000903788	1	0	0.969	0.485
1245	LG6(N4)	78.026	ATA-cctt350	0.06	4	0.748667	0.743222	0.748667	0.743222	0.00090571	0.8	0	1	0.5
1246	LG6(N4)	79.026		0.06	4	0.748667	0.743222	0.748667	0.743222	0.000905708	0.8	0	0.978	0.489
1247	LG6(N4)	80.026		0.06	4	0.748667	0.743222	0.748667	0.743222	0.000905708	0.8	0	0.982	0.491
1248	LG6(N4)	80.716	ATA-cgaa120	0.06	4	0.748667	0.743222	0.748667	0.743222	0.00090571	0.8	0	1	0.5
1249	LG6(N4)	81.716		0.06	4	0.748667	0.743222	0.748667	0.743222	0.00090571	0.8	0	0.991	0.496
1250	LG6(N4)	82.053	CaiSSRB04O03-270	0.06	4	0.748667	0.743222	0.748667	0.743222	0.00090571	0.8	0	1	0.5
1251	LG6(N4)	83.053		0.06	4	0.748667	0.743222	0.748667	0.743222	0.00090571	0.8	0	0.991	0.496
1252	LG6(N4)	83.362	CaiSSRB04O03-280	0.06	4	0.748667	0.743222	0.748667	0.743222	0.00090571	0.8	0	1	0.5
1253	LG6(N4)	84.362		0.05	4	0.748566	0.743274	0.748566	0.743274	0.000906108	0.8	0	0.965	0.483
1254	LG6(N4)	85.362		0.05	4	0.748462	0.743332	0.748462	0.743332	0.00090652	0.7	0	0.938	0.469
1255	LG6(N4)	86.362		0.05	4	0.748355	0.743395	0.748355	0.743395	0.000906941	0.7	0	0.917	0.459
1256	LG6(N4)	87.362		0.04	4	0.748245	0.743464	0.748245	0.743464	0.00090737	0.6	0	0.904	0.452
1257	LG6(N4)	88.362		0.04	4	0.748132	0.743538	0.748132	0.743538	0.000907803	0.6	0	0.897	0.449
1258	LG6(N4)	89.362		0.04	4	0.748017	0.743618	0.748017	0.743618	0.000908235	0.5	0	0.898	0.449
1259	LG6(N4)	90.362		0.03	4	0.7479	0.743702	0.7479	0.743702	0.000908664	0.5	0	0.905	0.453
1260	LG6(N4)	91.362		0.03	4	0.747781	0.74379	0.747781	0.74379	0.000909084	0.4	0	0.92	0.46
1261	LG6(N4)	92.362		0.03	4	0.747661	0.743881	0.747661	0.743881	0.000909493	0.4	0	0.941	0.471
1262	LG6(N4)	93.362		0.02	4	0.747541	0.743976	0.747541	0.743976	0.000909886	0.3	0	0.97	0.485
1263	LG6(N4)	94.22	AGG-cgtt420	0.02	4	0.747438	0.744059	0.747438	0.744059	0.000910208	0.3	0	1	0.5
1264	LG6(N4)	95.22		0.1	4	0.749008	0.741928	0.749008	0.741928	0.00090058	1.4	0	0.966	0.483
1265	LG6(N4)	95.542	LmSSR1-9G-200	0.13	4	0.749389	0.741267	0.749389	0.741267	0.000896703	1.8	0	1	0.5
1266	LG6(N4)	96.542		0.11	4	0.749132	0.741784	0.749132	0.741784	0.000899621	1.5	0	0.965	0.482
1267	LG6(N4)	97.542		0.08	4	0.748828	0.742331	0.748828	0.742331	0.000902518	1.2	0	0.989	0.494
1268	LG6(N4)	97.735	GTC-ccac-210	0.08	4	0.748765	0.742438	0.748765	0.742438	0.00090306	1.1	0	1	0.5
1269	LG6(N4)	98.051	GGT-cttt-150	0.02	4	0.747438	0.744059	0.747438	0.744059	0.000910208	0.3	0	1	0.5
1270	LG6(N4)	99.051		0.02	4	0.747438	0.744059	0.747438	0.744059	0.000910208	0.3	0	0.992	0.496
1271	LG6(N4)	99.309	LmSSR7-6H-180*	0.02	4	0.747438	0.744059	0.747438	0.744059	0.000910208	0.3	0	1	0.5
1272	LG6(N4)	100.309		0.02	4	0.747444	0.74409	0.747444	0.74409	0.000910253	0.3	0	0.97	0.485
1273	LG6(N4)	101.309		0.02	4	0.74745	0.744121	0.74745	0.744121	0.000910298	0.3	0	0.954	0.477
1274	LG6(N4)	102.309		0.02	4	0.747455	0.744152	0.747455	0.744152	0.000910343	0.3	0	0.952	0.476
1275	LG6(N4)	103.309		0.02	4	0.74746	0.744183	0.74746	0.744183	0.000910389	0.3	0	0.964	0.482
1276	LG6(N4)	104.309		0.02	4	0.747465	0.744213	0.747465	0.744213	0.000910436	0.3	0	0.99	0.495
1277	LG6(N4)	104.603	LmSSR2-5G-270	0.02	4	0.747467	0.744222	0.747467	0.744222	0.00091045	0.3	0	1	0.5
1278	LG6(N4)	105.208	AGG-cgtt140	0.07	4	0.748875	0.742706	0.748875	0.742706	0.000903554	1	0	1	0.5
1279	LG6(N4)	106.208		0.06	4	0.748513	0.743118	0.748513	0.743118	0.000905796	0.8	0	0.955	0.478
1280	LG6(N4)	107.208		0.04	4	0.748117	0.743544	0.748117	0.743544	0.000907849	0.6	0	0.919	0.459
1281	LG6(N4)	108.208		0.03	4	0.747687	0.743981	0.747687	0.743981	0.000909644	0.4	0	0.892	0.446
1282	LG6(N4)	109.208		0.01	4	0.747224	0.744423	0.747224	0.744423	0.000911115	0.2	0	0.873	0.436
1283	LG6(N4)	110.208		0.01	4	0.746729	0.744865	0.746729	0.744865	0.000912201	0.1	0	0.863	0.431
1284	LG6(N4)	111.208		0	4	0.746206	0.745301	0.746206	0.745301	0.000912858	0	0	0.862	0.431
1285	LG6(N4)	112.208		0	3	0.74566	0.745725	0.74566	0.745725	0.000913059	0	0	0.869	0.434
1286	LG6(N4)	113.208		0	4	0.745098	0.746131	0.745098	0.746131	0.000912799	0	0	0.885	0.442
1287	LG6(N4)	114.208		0.01	4	0.744528	0.746516	0.744528	0.746516	0.000912102	0.1	0	0.909	0.455
1288	LG6(N4)	115.208		0.02	4	0.743959	0.746874	0.743959	0.746874	0.000911014	0.2	0	0.943	0.471
1289	LG6(N4)	116.208		0.03	4	0.743402	0.747203	0.743402	0.747203	0.000909602	0.4	0	0.985	0.492
1290	LG6(N4)	116.521	LmSSR17-8D-700	0.03	4	0.743231	0.7473	0.743231	0.7473	0.000909106	0.4	0	1	0.5
1291	LG6(N4)	117.521		0.02	4	0.743535	0.747138	0.743535	0.747138	0.000909944	0.3	0	0.938	0.469
1292	LG6(N4)	118.521		0.02	4	0.743853	0.746959	0.743853	0.746959	0.000910733	0.3	0	0.884	0.442
1293	LG6(N4)	119.521		0.01	5	0.744181	0.746761	0.744181	0.746761	0.000911446	0.2	0	0.836	0.418
1294	LG6(N4)	120.521		0.01	5	0.744516	0.746548	0.744516	0.746548	0.000912055	0.1	0	0.794	0.397
1295	LG6(N4)	121.521		0	5	0.744855	0.746319	0.744855	0.746319	0.000912536	0.1	0	0.759	0.38
1296	LG6(N4)	122.521		0	4	0.745195	0.746078	0.745195	0.746078	0.000912869	0	0	0.731	0.366
1297	LG6(N4)	123.521		0	4	0.745533	0.745824	0.745533	0.745824	0.000913039	0	0	0.709	0.355
1298	LG6(N4)	124.521		0	4	0.745867	0.745561	0.745867	0.745561	0.000913037	0	0	0.694	0.347
1299	LG6(N4)	125.521		0	5	0.746194	0.74529	0.746194	0.74529	0.000912858	0	0	0.685	0.342
1300	LG6(N4)	126.521		0	5	0.746511	0.745014	0.746511	0.745014	0.000912504	0.1	0	0.682	0.341
1301	LG6(N4)	127.521		0.01	5	0.746816	0.744733	0.746816	0.744733	0.000911981	0.1	0	0.686	0.343
1302	LG6(N4)	128.521		0.01	5	0.747109	0.744451	0.747109	0.744451	0.0009113	0.2	0	0.696	0.348
1303	LG6(N4)	129.521		0.02	5	0.747387	0.744168	0.747387	0.744168	0.000910476	0.3	0	0.713	0.356
1304	LG6(N4)	130.521		0.03	5	0.747649	0.743887	0.747649	0.743887	0.000909528	0.4	0	0.736	0.368
1305	LG6(N4)	131.521		0.03	5	0.747894	0.74361	0.747894	0.74361	0.000908476	0.5	0	0.765	0.383
1306	LG6(N4)	132.521		0.04	5	0.748121	0.743339	0.748121	0.743339	0.000907342	0.6	0	0.801	0.401
1307	LG6(N4)	133.521		0.05	5	0.748331	0.743074	0.748331	0.743074	0.00090615	0.8	0	0.844	0.422
1308	LG6(N4)	134.521		0.06	4	0.748522	0.742817	0.748522	0.742817	0.000904923	0.9	0	0.893	0.446
1309	LG6(N4)	135.521		0.07	4	0.748695	0.74257	0.748695	0.74257	0.000903685	1	0	0.949	0.474
1310	LG6(N4)	136.344	GCG-cgcg-290	0.08	4	0.748824	0.742375	0.748824	0.742375	0.000902673	1.1	0	1	0.5
1311	LG6(N4)	137.2	LmSSRPere1	0.08	4	0.748824	0.742375	0.748824	0.742375	0.000902673	1.1	0	1	0.5
1312	LG6(N4)	138.2		0.08	4	0.748815	0.742342	0.748815	0.742342	0.000902597	1.1	0	0.962	0.481
1313	LG6(N4)	139.2		0.08	4	0.748807	0.742309	0.748807	0.742309	0.000902523	1.2	0	0.933	0.467
1314	LG6(N4)	140.2		0.08	4	0.748797	0.742276	0.748797	0.742276	0.000902453	1.2	0	0.913	0.457
1315	LG6(N4)	141.2		0.08	4	0.748788	0.742244	0.748788	0.742244	0.000902386	1.2	0	0.902	0.451
1316	LG6(N4)	142.2		0.08	4	0.748777	0.742212	0.748777	0.742212	0.000902323	1.2	0	0.899	0.449
1317	LG6(N4)	143.2		0.08	4	0.748767	0.74218	0.748767	0.74218	0.000902263	1.2	0	0.905	0.452
1318	LG6(N4)	144.2		0.09	4	0.748755	0.742148	0.748755	0.742148	0.000902207	1.2	0	0.919	0.46
1319	LG6(N4)	145.2		0.09	4	0.748743	0.742117	0.748743	0.742117	0.000902154	1.2	0	0.943	0.471
1320	LG6(N4)	146.2		0.09	4	0.748731	0.742086	0.748731	0.742086	0.000902106	1.2	0	0.975	0.487
1321	LG6(N4)	146.839	ATG-cgat250	0.09	4	0.748722	0.742067	0.748722	0.742067	0.000902077	1.2	0	1	0.5
1322	LG7(N4)	0	GAA-ctaa-250	0.16	4	0.749833	0.740733	0.749833	0.740733	0.000892528	2.2	0	1	0.5
1323	LG7(N4)	0	ATC-caac-290	0.16	4	0.749833	0.740733	0.749833	0.740733	0.000892528	2.2	0	1	0.5
1324	LG7(N4)	1		0.19	4	0.750073	0.740187	0.750073	0.740187	0.000888945	2.6	0	0.967	0.484
1325	LG7(N4)	2		0.22	4	0.750277	0.739676	0.750277	0.739676	0.000885486	3	0	0.97	0.485
1326	LG7(N4)	2.837	AAC-ccgt330	0.24	4	0.750421	0.739286	0.750421	0.739286	0.000882772	3.3	0	1	0.5
1327	LG7(N4)	3.837		0.1	8	0.749525	0.740613	0.749525	0.740613	0.000893596	2.1	0	0.95	0.475
1328	LG7(N4)	4.837		0	12	0.744843	0.746865	0.744843	0.746865	0.000912063	0.1	0	0.943	0.472
1329	LG7(N4)	5.837		0.1	5	0.742395	0.750208	0.742395	0.750208	0.000898167	1.6	0	0.98	0.49
1330	LG7(N4)	6.144	GGG-cttg	0.14	4	0.742105	0.750571	0.742105	0.750571	0.000895552	1.9	0	1	0.5
1331	LG7(N4)	7.144		0.15	4	0.741895	0.750759	0.741895	0.750759	0.000893816	2.1	0	0.967	0.483
1332	LG7(N4)	8.144		0.16	4	0.741691	0.750934	0.741691	0.750934	0.00089208	2.3	0	0.943	0.472
1333	LG7(N4)	9.144		0.18	4	0.741495	0.751098	0.741495	0.751098	0.000890367	2.5	0	0.929	0.464
1334	LG7(N4)	10.144		0.19	4	0.741308	0.751249	0.741308	0.751249	0.000888693	2.7	0	0.924	0.462
1335	LG7(N4)	11.144		0.2	4	0.741131	0.751388	0.741131	0.751388	0.000887074	2.8	0	0.929	0.465
1336	LG7(N4)	12.144		0.22	4	0.740964	0.751515	0.740964	0.751515	0.000885521	3	0	0.944	0.472
1337	LG7(N4)	13.144		0.23	4	0.740807	0.751631	0.740807	0.751631	0.000884042	3.2	0	0.968	0.484
1338	LG7(N4)	14.107	LmSSR10-7A	0.24	4	0.740667	0.751733	0.740667	0.751733	0.000882695	3.3	0	1	0.5
1339	LG7(N4)	15.107		0.22	4	0.740757	0.75121	0.740757	0.75121	0.000885826	3	0	0.978	0.489
1340	LG7(N4)	15.729	GTT-cgag-210	0.2	4	0.740824	0.750875	0.740824	0.750875	0.000887825	2.8	0	1	0.5
1341	LG7(N4)	15.729	GTT-cgag-220	0.2	4	0.740824	0.750875	0.740824	0.750875	0.000887825	2.8	0	1	0.5
1342	LG7(N4)	16.729		0.15	4	0.741691	0.750368	0.741691	0.750368	0.000894347	2	0	0.992	0.496
1343	LG7(N4)	16.997	AAT-cgct410	0.13	4	0.741944	0.7502	0.741944	0.7502	0.000896162	1.9	0	1	0.5
1344	LG7(N4)	17.566	ATA-cctt130	0.13	4	0.741944	0.7502	0.741944	0.7502	0.000896162	1.9	0	1	0.5
1345	LG7(N4)	18.566		0.13	4	0.741944	0.7502	0.741944	0.7502	0.000896161	1.9	0	0.992	0.496
1346	LG7(N4)	18.873	LmSSR18-5D*	0.13	4	0.741944	0.7502	0.741944	0.7502	0.000896162	1.9	0	1	0.5
1347	LG7(N4)	19.873		0.16	4	0.74151	0.750438	0.74151	0.750438	0.000893206	2.2	0	0.967	0.483
1348	LG7(N4)	20.873		0.18	4	0.741077	0.750647	0.741077	0.750647	0.000890189	2.5	0	0.952	0.476
1349	LG7(N4)	21.873		0.2	4	0.740652	0.750827	0.740652	0.750827	0.000887179	2.8	0	0.956	0.478
1350	LG7(N4)	22.873		0.23	4	0.74024	0.750979	0.74024	0.750979	0.000884237	3.2	0	0.978	0.489
1351	LG7(N4)	23.477	ATG-ctag-160	0.24	4	0.74	0.751059	0.74	0.751059	0.000882513	3.3	0	1	0.5
1352	LG7(N4)	24.477		0.2	4	0.74069	0.750676	0.74069	0.750676	0.000888129	2.7	0	0.965	0.482
1353	LG7(N4)	25.443	TAG-cctg-150	0.15	4	0.741471	0.750188	0.741471	0.750188	0.000894081	2.1	0	1	0.5
1354	LG7(N4)	26.443		0.15	4	0.741419	0.75014	0.741419	0.75014	0.000894048	2.1	0	0.956	0.478
1355	LG7(N4)	27.443		0.15	4	0.741366	0.750094	0.741366	0.750094	0.000894017	2.1	0	0.932	0.466
1356	LG7(N4)	28.443		0.15	4	0.741313	0.750048	0.741313	0.750048	0.000893988	2.1	0	0.929	0.464
1357	LG7(N4)	29.443		0.15	4	0.74126	0.750002	0.74126	0.750002	0.000893959	2.1	0	0.946	0.473
1358	LG7(N4)	30.443		0.15	4	0.741207	0.749956	0.741207	0.749956	0.000893933	2.1	0	0.984	0.492
1359	LG7(N4)	30.759	TAA-ctga-200	0.15	4	0.74119	0.749942	0.74119	0.749942	0.000893925	2.1	0	1	0.5
1360	LG7(N4)	31.759		0.13	4	0.741532	0.749711	0.741532	0.749711	0.000896343	1.8	0	0.95	0.475
1361	LG7(N4)	32.759		0.11	4	0.741883	0.749458	0.741883	0.749458	0.000898714	1.6	0	0.91	0.455
1362	LG7(N4)	33.759		0.09	4	0.74224	0.749184	0.74224	0.749184	0.000901004	1.3	0	0.881	0.44
1363	LG7(N4)	34.759		0.07	5	0.742601	0.748889	0.742601	0.748889	0.000903176	1.1	0	0.861	0.43
1364	LG7(N4)	35.759		0.06	5	0.742966	0.748576	0.742966	0.748576	0.000905196	0.9	0	0.851	0.426
1365	LG7(N4)	36.759		0.05	4	0.743331	0.748246	0.743331	0.748246	0.000907028	0.7	0	0.851	0.426
1366	LG7(N4)	37.759		0.03	4	0.743694	0.747902	0.743694	0.747902	0.000908643	0.5	0	0.862	0.431
1367	LG7(N4)	38.759		0.02	4	0.744053	0.747547	0.744053	0.747547	0.000910018	0.3	0	0.882	0.441
1368	LG7(N4)	39.759		0.01	4	0.744404	0.747184	0.744404	0.747184	0.000911137	0.2	0	0.912	0.456
1369	LG7(N4)	40.759		0.01	4	0.744745	0.746816	0.744745	0.746816	0.000911994	0.1	0	0.952	0.476
1370	LG7(N4)	41.707	TAT-ctat-390	0	4	0.745056	0.746467	0.745056	0.746467	0.000912566	0.1	0	1	0.5
1371	LG7(N4)	42.707		0.06	5	0.743004	0.748711	0.743004	0.748711	0.000904945	0.9	0	0.93	0.465
1372	LG7(N4)	43.544	GTC-cgct-260	0.15	4	0.741412	0.75025	0.741412	0.75025	0.000893549	2.1	0	1	0.5
1373	LG7(N4)	44.544		0.13	4	0.741641	0.749827	0.741641	0.749827	0.000896306	1.8	0	0.958	0.479
1374	LG7(N4)	45.544		0.1	5	0.741943	0.749361	0.741943	0.749361	0.000899303	1.5	0	0.934	0.467
1375	LG7(N4)	46.544		0.08	5	0.742316	0.74886	0.742316	0.74886	0.000902368	1.2	0	0.927	0.464
1376	LG7(N4)	47.544		0.06	5	0.742754	0.748336	0.742754	0.748336	0.000905291	0.9	0	0.939	0.469
1377	LG7(N4)	48.544		0.04	4	0.743238	0.74781	0.743238	0.74781	0.000907863	0.6	0	0.968	0.484
1378	LG7(N4)	49.257	TTA-ccga-100	0.03	4	0.7436	0.747444	0.7436	0.747444	0.000909395	0.4	0	1	0.5
1379	LG7(N4)	50.257		0.02	4	0.743936	0.747243	0.743936	0.747243	0.000910338	0.3	0	0.94	0.47
1380	LG7(N4)	51.257		0.01	4	0.744273	0.747017	0.744273	0.747017	0.00091118	0.2	0	0.891	0.445
1381	LG7(N4)	52.257		0.01	4	0.744606	0.746765	0.744606	0.746765	0.000911894	0.1	0	0.851	0.425
1382	LG7(N4)	53.257		0	4	0.744932	0.746488	0.744932	0.746488	0.000912455	0.1	0	0.821	0.41
1383	LG7(N4)	54.257		0	4	0.74525	0.746186	0.74525	0.746186	0.000912841	0	0	0.801	0.4
1384	LG7(N4)	55.257		0	4	0.745557	0.74586	0.745557	0.74586	0.000913037	0	0	0.79	0.395
1385	LG7(N4)	56.257		0	4	0.74585	0.745509	0.74585	0.745509	0.000913031	0	0	0.79	0.395
1386	LG7(N4)	57.257		0	4	0.746127	0.745137	0.746127	0.745137	0.000912819	0	0	0.799	0.399
1387	LG7(N4)	58.257		0	4	0.746387	0.744744	0.746387	0.744744	0.000912402	0.1	0	0.818	0.409
1388	LG7(N4)	59.257		0.01	4	0.746627	0.744335	0.746627	0.744335	0.000911793	0.1	0	0.846	0.423
1389	LG7(N4)	60.257		0.02	4	0.746847	0.743914	0.746847	0.743914	0.00091101	0.2	0	0.885	0.442
1390	LG7(N4)	61.257		0.02	4	0.747044	0.743485	0.747044	0.743485	0.000910081	0.3	0	0.933	0.467
1391	LG7(N4)	62.257		0.03	4	0.747217	0.743056	0.747217	0.743056	0.000909044	0.4	0	0.992	0.496
1392	LG7(N4)	62.387	GTC-ccac-190	0.03	4	0.747238	0.743	0.747238	0.743	0.000908903	0.5	0	1	0.5
1393	LG7(N4)	63.387		0.02	4	0.747058	0.743345	0.747058	0.743345	0.00090986	0.4	0	0.966	0.483
1394	LG7(N4)	64.387		0.02	4	0.746865	0.743705	0.746865	0.743705	0.000910733	0.3	0	0.94	0.47
1395	LG7(N4)	65.387		0.01	4	0.746662	0.744075	0.746662	0.744075	0.000911495	0.2	0	0.922	0.461
1396	LG7(N4)	66.387		0.01	4	0.74645	0.744449	0.74645	0.744449	0.00091212	0.1	0	0.913	0.456
1397	LG7(N4)	67.387		0	4	0.746232	0.744824	0.746232	0.744824	0.000912593	0.1	0	0.911	0.455
1398	LG7(N4)	68.387		0	4	0.74601	0.745193	0.74601	0.745193	0.000912902	0	0	0.917	0.458
1399	LG7(N4)	69.387		0	3	0.745787	0.745554	0.745787	0.745554	0.000913047	0	0	0.931	0.466
1400	LG7(N4)	70.387		0	3	0.745565	0.745903	0.745565	0.745903	0.000913033	0	0	0.953	0.477
1401	LG7(N4)	71.387		0	3	0.745348	0.746237	0.745348	0.746237	0.000912871	0	0	0.983	0.492
1402	LG7(N4)	71.844	LmSSR10-10D-140	0	4	0.74525	0.746385	0.74525	0.746385	0.000912752	0	0	1	0.5
1403	LG7(N4)	71.844	GAG-cacc-220	0	4	0.74525	0.746385	0.74525	0.746385	0.000912752	0	0	1	0.5
1404	LG7(N4)	71.844	GAG-cacc-230	0	4	0.74525	0.746385	0.74525	0.746385	0.000912752	0	0	1	0.5
1405	LG7(N4)	72.844		0.01	4	0.74488	0.746987	0.74488	0.746987	0.000912005	0.1	0	0.969	0.485
[truncated: 5 more rows]

## Sheet: FVFM30
Nr	Group	Position	Locus	LOD	# Iter.	mu_ac{00}	mu_ad{00}	mu_bc{00}	mu_bd{00}	Variance	% Expl.	GIC_1	GIC_2	GIC_m
[truncated: 1,410 more rows]

[truncated: 10 more sheets: FVFM40, H2O2con, H2O2-40, MDAcon, MDA-40, LWC, LA, SLA, LT, LD]
